# Supplementary material for: Single-Cell Analyses Reveal Necroptosis's Potential Role in Neuron Degeneration and Show Enhanced Neuron-Immune Cell Interaction in Parkinson's Disease Progression
Source: Parkinsons Dis. 2023 Dec 19;2023:5057778. doi: 10.1155/2023/5057778 (PMC10751163; doi:10.1155/2023/5057778)
Supplement: Supplementary Materials — Figure S1: DA and GABA subclusters distribution. A: Heatmap showing DEGs expression of DA and GABA in single cells. B: KEGG enrichment of DEGs. C: PCA of two DA subclusters between PD and control samples. D: PCA of two GABA subclusters between PD and normal samples. Table S1: Detailed information of the patient samples and control samples were listed. Dataset column shows the sources of the samples. The sample name column shows the name of each sample appeared in the dataset. The brain position where samples came from includes Midbrain and substantia nigra. The patients and control samples' gender and ages were also provided. Table S2: Differential expression genes between Control and Parkinson's disease patients in cell subtypes (GABA, DA and GLU respectively) with statistical test. [file 5057778.f1.zip › Table S2-DA DEGs (1).txt]

	p_val	avg_log2FC	pct.1	pct.2	p_val_adj	BH	PFC	log_padj	color
MALAT1	2.29E-33	1.614445283	1	1	5.18E-29	2.15E-29	46.2821146	28.25148513	red
SNHG11	1.19E-32	1.062948095	1	1	2.70E-28	5.60E-29	30.02986229	28.25148513	red
PTGDS	1.28E-29	3.435930747	0.901	0.143	2.89E-25	4.00E-26	87.26670675	25.39827289	red
RTN1	2.09E-27	1.366424834	1	0.95	4.73E-23	4.91E-24	31.84978533	23.30884549	red
HSP90AB1	2.94E-23	2.111744179	0.934	0.307	6.64E-19	5.51E-20	40.66987788	19.25890375	red
CALM1	2.14E-21	1.766024712	0.978	0.436	4.84E-17	3.35E-18	30.86111022	17.47490282	red
AC149090.1	8.01E-21	-1.829535572	0.703	0.943	1.81E-16	1.07E-17	31.04587081	16.96926329	blue
PLP1	1.76E-18	2.637091795	0.835	0.286	3.97E-14	2.06E-15	38.72762831	14.68573388	red
FTH1	1.71E-17	1.754271838	0.912	0.436	3.87E-13	1.68E-14	24.16439776	13.77460279	red
BSG	1.79E-17	1.702296077	0.901	0.343	4.05E-13	1.68E-14	23.4484523	13.77460279	red
APOD	6.30E-17	2.96449818	0.495	0.029	1.42E-12	5.37E-14	39.33832716	13.26980986	red
CDR1OS	1.62E-16	-1.084981098	0.934	0.943	3.67E-12	1.27E-13	13.99233484	12.89638581	blue
ITM2B	4.61E-16	1.590856082	0.912	0.486	1.04E-11	3.33E-13	19.85071729	12.47800949	red
TRIM35	5.74E-16	1.706877898	0.747	0.207	1.30E-11	3.85E-13	21.19058434	12.41482144	red
ATP6V0C	1.93E-15	1.180841836	1	0.707	4.35E-11	1.21E-12	14.07441031	11.91896314	red
SLC25A4	2.16E-15	1.582107985	0.868	0.371	4.88E-11	1.27E-12	18.82339811	11.89766962	red
SCG5	6.18E-15	1.333208735	0.978	0.621	1.40E-10	3.41E-12	15.2881915	11.46721522	red
ATP1B1	7.25E-15	1.297939967	0.989	0.757	1.64E-10	3.78E-12	14.82616715	11.42284507	red
UBB	1.48E-14	1.492365615	0.857	0.471	3.33E-10	7.29E-12	16.6213107	11.13755941	red
COX6A1	2.20E-14	1.517717748	0.714	0.171	4.98E-10	1.03E-11	16.67360106	10.98596961	red
NDUFA4	3.33E-14	1.596715273	0.813	0.3	7.52E-10	1.49E-11	17.28914706	10.82794619	red
SNHG14	4.12E-14	-0.855369054	0.989	0.986	9.32E-10	1.76E-11	9.199329711	10.75480773	black
MEG3	4.89E-14	0.503010344	1	1	1.10E-09	1.99E-11	5.382320281	10.70021788	black
HSP90AA1	6.90E-14	1.409471817	0.934	0.479	1.56E-09	2.70E-11	14.8964872	10.5688436	red
CAR2	7.75E-14	2.441682844	0.429	0.029	1.75E-09	2.91E-11	25.72596105	10.53615997	red
X6030458C11RIK	2.28E-13	1.891881176	0.604	0.129	5.14E-09	7.93E-11	19.10976406	10.1009325	red
SCG2	2.28E-13	1.69704371	0.978	0.607	5.16E-09	7.93E-11	17.14172397	10.1009325	red
AW209491	2.69E-13	2.010603072	0.484	0.057	6.09E-09	8.81E-11	20.21701122	10.05519762	red
MDH1	2.72E-13	1.476667959	0.846	0.393	6.15E-09	8.81E-11	14.84818814	10.05519762	red
LUC7L2	4.65E-13	-0.902069189	0.923	0.971	1.05E-08	1.46E-10	8.873584131	9.836921873	black
STMN1	7.70E-13	1.500608064	0.769	0.264	1.74E-08	2.33E-10	14.45435473	9.632331772	red
PRELID3A	1.34E-12	1.604610999	0.615	0.129	3.03E-08	3.93E-10	15.09193491	9.40535427	red
HSPA5	1.51E-12	1.494345142	0.78	0.257	3.42E-08	4.31E-10	13.99605235	9.366010538	red
PPIA	1.66E-12	1.403988963	0.802	0.343	3.75E-08	4.58E-10	13.11222996	9.339268541	red
CNP	2.28E-12	2.128677148	0.44	0.05	5.15E-08	6.10E-10	19.61434802	9.214336725	red
MAL	3.28E-12	2.959894828	0.308	0	7.42E-08	8.56E-10	26.83915623	9.067604694	red
NRXN1	4.38E-12	-0.475095746	1	1	9.90E-08	1.11E-09	4.254186757	8.954377715	black
APLP1	5.60E-12	1.300025114	0.934	0.514	1.27E-07	1.38E-09	11.51697985	8.85904413	red
CTSL	9.09E-12	1.561608294	0.626	0.171	2.05E-07	2.19E-09	13.524114	8.660375366	red
ACP1	9.71E-12	1.328160892	0.736	0.221	2.19E-07	2.28E-09	11.47859917	8.642476404	red
LRPAP1	1.33E-11	1.520509521	0.681	0.214	3.00E-07	3.04E-09	12.95068886	8.517334933	red
GALNTL6	1.74E-11	-1.079972586	0.945	0.964	3.94E-07	3.82E-09	9.091559169	8.41832403	blue
NDUFB8	1.75E-11	1.651229019	0.582	0.143	3.95E-07	3.82E-09	13.90058093	8.41832403	red
ATP5J	2.66E-11	1.484193784	0.648	0.186	6.02E-07	5.68E-09	12.23804585	8.245584893	red
EIF2S3Y	2.73E-11	1.107774728	0.923	0.529	6.17E-07	5.69E-09	9.133541742	8.244945034	red
APOE	3.11E-11	1.983664382	0.571	0.15	7.03E-07	6.34E-09	16.26144774	8.197680964	red
FKBP3	3.40E-11	1.543436757	0.604	0.157	7.68E-07	6.78E-09	12.60757989	8.168510842	red
UBC	3.52E-11	1.408940916	0.692	0.214	7.97E-07	6.89E-09	11.49955104	8.161840508	red
PSMA1	3.75E-11	1.226786061	0.835	0.4	8.47E-07	7.18E-09	9.990913853	8.143974053	red
NDFIP1	4.05E-11	0.888043998	0.989	0.757	9.15E-07	7.59E-09	7.210479383	8.119506917	black
GM48677	4.80E-11	1.968848097	0.341	0.021	1.09E-06	8.83E-09	15.85696617	8.053930719	red
GSTZ1	5.11E-11	1.65659965	0.571	0.136	1.15E-06	9.21E-09	13.3117121	8.03556375	red
SEC62	5.59E-11	1.103305347	0.956	0.643	1.26E-06	9.90E-09	8.83130957	8.004411104	red
LDHB	6.71E-11	1.639481664	0.659	0.25	1.52E-06	1.17E-08	13.00704416	7.933631985	red
CD81	7.02E-11	1.182840016	0.857	0.386	1.59E-06	1.20E-08	9.370223652	7.921801361	red
GLUL	7.65E-11	1.963463684	0.44	0.071	1.73E-06	1.28E-08	15.49616089	7.892257453	red
DNAJC3	8.80E-11	2.094777752	0.407	0.057	1.99E-06	1.45E-08	16.42082174	7.838932663	red
ATP6AP2	9.02E-11	1.291978428	0.758	0.271	2.04E-06	1.46E-08	10.12396099	7.836013952	red
TUBA1A	1.06E-10	1.19642486	0.868	0.379	2.39E-06	1.68E-08	9.300748151	7.773783764	red
CCSER1	1.13E-10	-0.668458142	1	0.986	2.55E-06	1.76E-08	5.183076862	7.75377924	black
FGF14	1.71E-10	-0.676641519	1	1	3.87E-06	2.63E-08	5.128917579	7.57996285	black
CNTNAP2	2.69E-10	-0.786377122	1	0.993	6.07E-06	4.07E-08	5.81191491	7.390747708	black
TXNDC15	2.77E-10	1.302300999	0.604	0.157	6.26E-06	4.13E-08	9.616879736	7.384529184	red
NUDT5	2.90E-10	1.620918981	0.429	0.064	6.56E-06	4.25E-08	11.94826265	7.371289242	red
TMX2	3.18E-10	1.155173679	0.736	0.279	7.20E-06	4.48E-08	8.488981876	7.348662831	red
X6430590A07RIK	3.19E-10	1.844612343	0.319	0.021	7.22E-06	4.48E-08	13.55543416	7.348662831	red
DDX24	3.20E-10	0.888383604	0.901	0.379	7.23E-06	4.48E-08	6.528431571	7.348662831	black
BCAP31	5.05E-10	1.382004151	0.505	0.107	1.14E-05	6.97E-08	9.890451957	7.156600761	red
CLDN11	6.85E-10	2.304397885	0.308	0.021	1.55E-05	9.31E-08	16.20186986	7.030847391	red
CST3	8.43E-10	0.915066263	0.945	0.593	1.90E-05	1.13E-07	6.357012339	6.947051375	black
ZFP933	9.65E-10	1.780109307	0.308	0.021	2.18E-05	1.28E-07	12.27283705	6.894428902	red
PNN	1.04E-09	1.132592586	0.846	0.414	2.34E-05	1.35E-07	7.780325184	6.869482709	red
RESP18	1.15E-09	1.091004965	0.967	0.707	2.60E-05	1.48E-07	7.451785192	6.830202821	red
RNPC3	1.22E-09	1.163974546	0.835	0.457	2.76E-05	1.55E-07	7.926479302	6.809839035	red
TSPAN3	1.54E-09	1.102100609	0.802	0.35	3.47E-05	1.92E-07	7.401838536	6.716118725	red
TECR	1.56E-09	0.800547252	0.978	0.793	3.53E-05	1.93E-07	5.375891786	6.715271048	black
EEF1A1	1.65E-09	0.957879265	0.912	0.436	3.74E-05	2.01E-07	6.413918048	6.695956662	black
ATP5H	1.89E-09	1.132314844	0.659	0.221	4.28E-05	2.28E-07	7.521969816	6.643002036	red
4-Sep	2.01E-09	1.54138626	0.484	0.114	4.55E-05	2.39E-07	10.20680185	6.621832643	red
CRYAB	2.05E-09	2.119353552	0.275	0.014	4.64E-05	2.41E-07	14.02582308	6.617972292	red
LAMP1	2.24E-09	1.388874727	0.593	0.171	5.06E-05	2.59E-07	9.146986574	6.585897487	red
CTSB	2.45E-09	1.184581021	0.747	0.307	5.53E-05	2.80E-07	7.762080004	6.552595276	red
CALM2	2.93E-09	0.97162082	0.879	0.486	6.63E-05	3.32E-07	6.295403259	6.47927991	black
TSPAN13	3.32E-09	1.012368854	0.78	0.293	7.51E-05	3.71E-07	6.510225021	6.430684817	red
COX5A	3.39E-09	1.259298779	0.56	0.15	7.66E-05	3.74E-07	8.093894923	6.427303084	red
ISCU	3.48E-09	1.645807114	0.473	0.114	7.87E-05	3.80E-07	10.56678187	6.420425444	red
LENG8	5.48E-09	-1.683323984	0.418	0.65	0.000123787	5.85E-07	10.49209347	6.232961435	blue
EMC4	5.49E-09	1.181115038	0.549	0.15	0.000123984	5.85E-07	7.361844479	6.232961435	red
HAGH	6.79E-09	1.329183175	0.538	0.15	0.000153385	7.15E-07	8.16842956	6.145450614	red
PTMA	7.54E-09	1.093126039	0.615	0.186	0.000170438	7.86E-07	6.673009508	6.10451976	red
RNF121	8.14E-09	1.472630032	0.593	0.2	0.000184065	8.40E-07	8.9475715	6.07591269	red
HSPA8	1.16E-08	0.902266892	0.846	0.429	0.000262355	1.18E-06	5.347503332	5.926742273	black
B4GAT1	1.26E-08	1.833810659	0.341	0.05	0.00028492	1.27E-06	10.81290182	5.896411264	red
PRAF2	1.27E-08	1.454592401	0.33	0.043	0.000287449	1.27E-06	8.57687502	5.896411264	red
RNF187	1.32E-08	1.237946803	0.495	0.129	0.000298882	1.31E-06	7.284161679	5.884066796	red
PCP4	1.36E-08	1.311800827	0.626	0.221	0.000306449	1.33E-06	7.710445272	5.877756067	red
SQSTM1	1.44E-08	1.019419022	0.582	0.179	0.00032584	1.39E-06	5.969320954	5.855610719	red
MOK	1.50E-08	1.615288359	0.429	0.1	0.000338992	1.43E-06	9.438742815	5.843379457	red
SNHG9	1.53E-08	-2.035756975	0.297	0.579	0.00034578	1.43E-06	11.89570049	5.843379457	blue
RPL4	1.54E-08	1.293848783	0.538	0.15	0.000347382	1.43E-06	7.560449396	5.843379457	red
ATP5A1	1.54E-08	0.933592313	0.714	0.279	0.000348968	1.43E-06	5.455334142	5.843379457	black
CFL1	1.58E-08	1.125072715	0.637	0.221	0.000357374	1.45E-06	6.567409901	5.83732039	red
NDUFB10	1.63E-08	1.36487573	0.396	0.079	0.000369276	1.49E-06	7.953581203	5.827329937	red
RPS7	1.77E-08	1.069562807	0.67	0.243	0.000400936	1.60E-06	6.198973546	5.795801334	red
UBE4BOS1	1.88E-08	1.870748577	0.209	0	0.000425696	1.68E-06	10.80407235	5.77526691	red
RAB3A	1.90E-08	1.221797205	0.593	0.207	0.000428607	1.68E-06	7.056204968	5.77526691	red
CADM2	1.91E-08	-0.864226166	0.989	0.993	0.000432474	1.68E-06	4.991136777	5.77526691	black
PGRMC1	2.03E-08	1.043060973	0.835	0.457	0.000458787	1.76E-06	6.003111565	5.755283458	red
TMBIM6	2.04E-08	1.335531912	0.571	0.207	0.000461303	1.76E-06	7.68636472	5.755283458	red
FTL1	2.16E-08	1.280977476	0.604	0.2	0.000487546	1.82E-06	7.351581583	5.739040476	red
SARAF	2.16E-08	1.01856857	0.835	0.443	0.00048767	1.82E-06	5.845606251	5.739040476	red
DAD1	2.27E-08	1.228006878	0.626	0.221	0.00051307	1.90E-06	7.025286587	5.720885373	red
RPS13	2.32E-08	1.068403231	0.67	0.264	0.000523506	1.92E-06	6.106993085	5.716000203	red
CAMK1	2.44E-08	1.298507023	0.604	0.221	0.000551572	2.01E-06	7.398217333	5.697479645	red
HINT1	2.46E-08	1.231319817	0.637	0.236	0.000555983	2.01E-06	7.015419593	5.697479645	red
ACTG1	2.86E-08	1.077097537	0.681	0.257	0.000647178	2.32E-06	6.069743899	5.635277854	red
A230057D06RIK	2.99E-08	-0.573166715	1	0.993	0.000675595	2.40E-06	3.221393671	5.620343236	black
TMX4	3.17E-08	0.932354654	0.868	0.486	0.000717164	2.52E-06	5.21942147	5.598107382	black
AGBL4	3.27E-08	-0.639778964	0.978	0.957	0.000740187	2.58E-06	3.575116109	5.588048858	black
SFR1	3.55E-08	1.440967457	0.319	0.043	0.000802163	2.77E-06	8.007113732	5.556762365	red
TMED9	3.65E-08	1.109506951	0.681	0.257	0.000824823	2.81E-06	6.158988323	5.551103862	red
MFAP3	3.66E-08	1.153397234	0.527	0.15	0.000826227	2.81E-06	6.402627839	5.551103862	red
RALYL	3.74E-08	-0.780711022	0.978	0.971	0.000844721	2.85E-06	4.329070172	5.545035292	black
ZRSR1	4.01E-08	1.7147181	0.297	0.036	0.000905514	3.03E-06	9.462449306	5.518370224	red
CDC42EP3	4.30E-08	1.537740749	0.484	0.157	0.000971256	3.23E-06	8.444380298	5.491419997	red
LRP1B	4.64E-08	-1.06819576	1	0.993	0.001049197	3.46E-06	5.833798419	5.461357026	blue
TMEM50A	4.69E-08	1.332495342	0.571	0.2	0.001060698	3.47E-06	7.27549884	5.460055739	red
FLRT1	4.73E-08	1.209125421	0.473	0.121	0.001069527	3.47E-06	6.601657773	5.45986186	red
MRFAP1	5.43E-08	1.153556027	0.582	0.193	0.001228406	3.95E-06	6.232768606	5.403091363	red
ACOT7	5.48E-08	0.948938731	0.769	0.329	0.001238339	3.95E-06	5.127066065	5.402947414	black
PIP4K2B	5.79E-08	1.15290971	0.462	0.114	0.001307728	4.11E-06	6.209934328	5.386314534	red
SNRNP70	5.80E-08	0.540803495	1	0.857	0.001310233	4.11E-06	2.912937723	5.386314534	black
ARPC1A	5.89E-08	1.106002228	0.549	0.164	0.001332222	4.11E-06	5.957275873	5.386314534	red
SLC25A5	5.92E-08	1.340130849	0.374	0.071	0.001338969	4.11E-06	7.218366269	5.386314534	red
SMS	5.94E-08	0.940872872	0.692	0.264	0.001343605	4.11E-06	5.067837226	5.386314534	black
CLTB	5.96E-08	0.984368768	0.692	0.286	0.001346071	4.11E-06	5.302119803	5.386314534	black
DNER	7.26E-08	0.836088111	0.857	0.479	0.001640896	4.97E-06	4.434179068	5.303482985	black
ATP6V1F	7.57E-08	1.375274348	0.495	0.15	0.001711019	5.15E-06	7.273094049	5.288467759	red
DCC	8.01E-08	-0.823999924	0.989	0.986	0.001811663	5.41E-06	4.339827196	5.266781061	black
HEATR5A	8.25E-08	1.03490861	0.681	0.293	0.001865255	5.53E-06	5.440756139	5.257233427	red
SDHB	8.48E-08	1.389286141	0.462	0.129	0.001917203	5.61E-06	7.294830852	5.250776377	red
SELENOS	8.51E-08	1.038839659	0.451	0.114	0.001922605	5.61E-06	5.454714738	5.250776377	red
MRI1	8.55E-08	1.561627535	0.352	0.064	0.001933763	5.61E-06	8.19975697	5.250776377	red
RSRP1	8.66E-08	-0.597737199	0.978	0.979	0.001958529	5.65E-06	3.137089875	5.248276133	black
NACA	9.01E-08	1.235072859	0.462	0.121	0.002035516	5.81E-06	6.466696187	5.235882354	red
OGFRL1	9.04E-08	1.323999011	0.407	0.1	0.002043215	5.81E-06	6.932303059	5.235882354	red
SERINC1	9.96E-08	0.866405898	0.923	0.564	0.002252438	6.36E-06	4.502285277	5.196508112	black
CTNNA2	1.06E-07	-0.656696424	1	1	0.002392195	6.71E-06	3.397293279	5.173308633	black
PEBP1	1.10E-07	1.093133092	0.593	0.214	0.002478404	6.90E-06	5.641504353	5.160857718	red
PTN	1.32E-07	1.506786762	0.462	0.143	0.002981265	8.14E-06	7.668648456	5.08940525	red
ATP6V1E1	1.33E-07	1.037206534	0.549	0.171	0.002996964	8.14E-06	5.278764379	5.08940525	red
MBP	1.33E-07	1.231684862	0.604	0.214	0.002999678	8.14E-06	6.268543405	5.08940525	red
KPTN	1.33E-07	1.384945236	0.286	0.036	0.003000059	8.14E-06	7.048547557	5.08940525	red
WBP2	1.51E-07	1.328551609	0.451	0.129	0.003417996	9.21E-06	6.690044878	5.035592772	red
FAU	1.54E-07	1.003324289	0.725	0.314	0.003481067	9.32E-06	5.047357695	5.030634415	red
PDCD7	1.55E-07	1.038758083	0.516	0.157	0.003502142	9.32E-06	5.22561216	5.030634415	red
SYT5	1.61E-07	1.296967304	0.484	0.15	0.003647401	9.64E-06	6.505276327	5.015759692	red
TM2D3	1.67E-07	0.890634455	0.637	0.236	0.003763603	9.89E-06	4.457533626	5.004896903	black
PPP1R1A	1.68E-07	1.315603846	0.451	0.129	0.00380368	9.93E-06	6.582014364	5.003036728	red
CACYBP	2.03E-07	1.46831363	0.341	0.064	0.004584207	1.18E-05	7.234337511	4.926970209	red
BC005537	2.03E-07	-1.674830134	0.319	0.571	0.004588801	1.18E-05	8.251838174	4.926970209	blue
TRF	2.06E-07	2.05137143	0.374	0.093	0.004646665	1.19E-05	10.10139853	4.924217223	red
RBM39	2.08E-07	0.528920263	0.989	0.914	0.004703946	1.20E-05	2.60311751	4.921568889	black
TCTA	2.10E-07	0.90878256	0.418	0.1	0.004753967	1.20E-05	4.470875092	4.919631263	black
SNHG20	2.13E-07	-1.296412334	0.648	0.707	0.00482168	1.21E-05	6.373330412	4.916129108	blue
SCPEP1OS	2.15E-07	1.522032637	0.242	0.021	0.004851862	1.21E-05	7.482378193	4.916043198	red
HERC1	2.22E-07	-0.755768464	0.868	0.864	0.005025936	1.25E-05	3.705792111	4.903343136	black
BTAF1	2.25E-07	0.893481027	0.868	0.45	0.005083362	1.26E-05	4.378952139	4.901001819	black
DNTTIP1	2.39E-07	1.426082204	0.407	0.1	0.005405736	1.33E-05	6.954825334	4.876875479	red
GABARAPL2	2.42E-07	1.061936326	0.571	0.2	0.005477907	1.34E-05	5.175535573	4.87367787	red
MBNL2	2.48E-07	0.755389656	0.89	0.571	0.005612404	1.36E-05	3.675492459	4.865690749	black
CALY	2.54E-07	0.866999984	0.879	0.55	0.005732617	1.38E-05	4.212769502	4.859019125	black
GNL3	2.63E-07	0.938923632	0.582	0.214	0.005942122	1.42E-05	4.551844185	4.847938672	black
TUBA1B	2.63E-07	1.037878749	0.736	0.357	0.00594914	1.42E-05	5.031572524	4.847938672	red
NAP1L5	2.76E-07	0.952748457	0.901	0.514	0.006228319	1.48E-05	4.602261705	4.830510795	black
PEX13	2.85E-07	1.12876493	0.571	0.207	0.006437225	1.52E-05	5.439131673	4.818657569	red
TSPAN5	2.98E-07	1.286955025	0.67	0.307	0.006731699	1.58E-05	6.179561813	4.801692128	red
GM11867	3.33E-07	-0.548641188	0.989	0.993	0.007523109	1.75E-05	2.609264112	4.75586625	black
TM7SF3	3.38E-07	1.545530827	0.33	0.064	0.007630233	1.77E-05	7.344607919	4.752158798	red
IFT122	3.66E-07	0.955763019	0.44	0.121	0.008275098	1.91E-05	4.510573434	4.719342917	black
GM27241	3.73E-07	1.393535854	0.319	0.057	0.008423908	1.93E-05	6.569139943	4.714008559	red
MORN1	3.82E-07	1.145454126	0.374	0.086	0.008624996	1.97E-05	5.390685874	4.706156059	red
SYS1	3.98E-07	1.105520774	0.44	0.121	0.009000814	2.04E-05	5.186079468	4.691073736	red
TMEM59L	4.01E-07	1.136507989	0.692	0.343	0.009063187	2.04E-05	5.33144278	4.691073736	red
X2610035D17RIK	4.02E-07	1.063449666	0.363	0.079	0.009076984	2.04E-05	4.988720796	4.691073736	red
HSPE1	4.16E-07	1.329422224	0.396	0.1	0.009413663	2.10E-05	6.21850255	4.67759786	red
PCYT2	4.21E-07	0.854652649	0.747	0.371	0.009513445	2.11E-05	3.995798005	4.675347359	black
DYNLRB1	4.40E-07	1.560487435	0.374	0.093	0.009935519	2.19E-05	7.270015863	4.658810895	red
TUBB4A	4.44E-07	1.057188459	0.538	0.179	0.010039203	2.20E-05	4.922910293	4.656606164	red
NSG1	4.79E-07	0.986962359	0.736	0.371	0.01081709	2.36E-05	4.567534912	4.62787144	black
DLG2	4.80E-07	-0.53015574	1	0.993	0.010839407	2.36E-05	2.453492606	4.62787144	black
ENDOD1	4.84E-07	0.991797517	0.44	0.121	0.010940855	2.37E-05	4.58814811	4.626093562	black
CWC15	4.98E-07	1.15469558	0.363	0.079	0.011258947	2.42E-05	5.329962905	4.615903098	red
SNX3	5.11E-07	0.985977035	0.462	0.136	0.011541678	2.47E-05	4.542767282	4.607376361	black
NRSN2	5.32E-07	0.912225579	0.758	0.357	0.012026306	2.56E-05	4.188708091	4.591745933	black
ALDOC	5.41E-07	1.230810305	0.44	0.121	0.012224433	2.59E-05	5.645568001	4.586870925	red
ECHDC1	5.82E-07	1.058728785	0.418	0.114	0.013149348	2.77E-05	4.825056472	4.557405579	red
DNAJA1	5.85E-07	0.695816194	0.626	0.221	0.0132311	2.77E-05	3.170773732	4.556912816	black
COX4I1	5.90E-07	0.83711479	0.813	0.457	0.013334326	2.78E-05	3.813665272	4.555725589	black
COX8A	5.99E-07	0.901747836	0.78	0.364	0.013544539	2.80E-05	4.104965467	4.552232125	black
GRIA2	6.01E-07	-0.471558364	1	1	0.013577116	2.80E-05	2.146643134	4.552232125	black
LNCPINT	6.47E-07	0.638057289	0.956	0.786	0.014614025	3.00E-05	2.885566295	4.522425091	black
LRRC29	6.68E-07	1.042763599	0.462	0.136	0.015109282	3.09E-05	4.702963733	4.510095804	red
UPP2	6.88E-07	-0.792847339	0.879	0.886	0.015549904	3.16E-05	3.567611673	4.499746038	black
SHISA4	6.95E-07	1.165988017	0.385	0.093	0.015709064	3.18E-05	5.24396947	4.497447138	red
PCLO	7.02E-07	-0.692479645	0.956	0.971	0.015862039	3.20E-05	3.112939605	4.49535178	black
ATP5C1	7.27E-07	0.889748031	0.538	0.171	0.016427232	3.29E-05	3.98807271	4.482249547	black
ERMN	7.38E-07	1.80768863	0.165	0	0.016687763	3.31E-05	8.097707047	4.479591736	red
OLIG1	7.38E-07	1.603573141	0.165	0	0.016687763	3.31E-05	7.183352991	4.479591736	red
FBXO21	7.47E-07	1.008842952	0.571	0.221	0.016880175	3.34E-05	4.516273056	4.476685939	red
LMX1A	7.66E-07	1.24643407	0.429	0.136	0.017320891	3.41E-05	5.568513782	4.467555819	red
MAP3K13	8.10E-07	1.316656224	0.44	0.136	0.018312662	3.56E-05	5.856650767	4.448124471	red
RAB11FIP4	8.11E-07	1.103791724	0.538	0.186	0.018328201	3.56E-05	4.909802979	4.448124471	red
ATP5F1	8.13E-07	0.844265767	0.659	0.264	0.018371004	3.56E-05	3.755399217	4.448124471	black
TPI1	8.37E-07	0.88135972	0.516	0.164	0.018919631	3.65E-05	3.910918637	4.437369384	black
EIF1	8.59E-07	0.866226171	0.747	0.35	0.019419781	3.73E-05	3.835889473	4.428277051	black
MRPS15	8.63E-07	0.999761308	0.538	0.186	0.019499625	3.73E-05	4.427220058	4.428277051	black
FBXL16	8.71E-07	0.958603437	0.527	0.171	0.019680659	3.75E-05	4.24302846	4.426260429	black
TUBB4B	8.79E-07	1.137773387	0.505	0.179	0.019873247	3.77E-05	5.033530924	4.424018863	red
RCN2	9.16E-07	0.949965861	0.615	0.25	0.020713409	3.91E-05	4.187463464	4.408014682	black
CYCS	9.41E-07	1.510979888	0.352	0.086	0.021276215	4.00E-05	6.645805511	4.398341477	red
KIF3A	9.49E-07	0.870356542	0.659	0.314	0.021447727	4.01E-05	3.826796948	4.396815287	black
QDPR	9.72E-07	1.432394495	0.33	0.071	0.021967211	4.09E-05	6.285882067	4.388373516	red
ANAPC13	9.77E-07	1.81428898	0.253	0.036	0.022073978	4.09E-05	7.961482852	4.388210996	red
TRMT6	9.88E-07	1.14602641	0.352	0.079	0.022341624	4.12E-05	5.025224234	4.384911368	red
JUND	1.02E-06	1.163809996	0.484	0.157	0.023168926	4.24E-05	5.088361334	4.372158129	red
FTL1.PS1	1.03E-06	1.498672009	0.22	0.021	0.023211933	4.24E-05	6.552431006	4.372158129	red
SNW1	1.05E-06	1.343237642	0.363	0.093	0.02380299	4.33E-05	5.860743182	4.36314692	red
X4930549G23RIK	1.08E-06	1.065842729	0.396	0.107	0.024480572	4.42E-05	4.640931626	4.354236794	red
SEC11C	1.08E-06	0.912195978	0.637	0.243	0.02450951	4.42E-05	3.97191729	4.354236794	black
DYNLT1B	1.10E-06	1.437497645	0.297	0.057	0.024918957	4.48E-05	6.251570464	4.348925708	red
MECR	1.11E-06	1.083923848	0.538	0.193	0.025111543	4.49E-05	4.712313584	4.347458164	red
PPP1R2	1.15E-06	1.0340732	0.626	0.243	0.025972011	4.63E-05	4.482390823	4.334693931	red
PGAM1	1.18E-06	0.885183967	0.604	0.229	0.026572073	4.71E-05	3.829867044	4.326633995	black
PKM	1.18E-06	0.769864973	0.802	0.429	0.026696703	4.72E-05	3.330785253	4.32645382	black
A230006K03RIK	1.19E-06	-0.657822919	0.934	0.914	0.026918516	4.73E-05	2.844889724	4.324704478	black
CHCHD2	1.23E-06	0.856193518	0.703	0.314	0.027726668	4.86E-05	3.69335705	4.313694246	black
TECPR1	1.26E-06	0.765084525	0.648	0.257	0.028527043	4.98E-05	3.292284022	4.303163789	black
GABARAP	1.34E-06	0.934934002	0.473	0.15	0.030181058	5.24E-05	4.001991555	4.280507018	black
TMED4	1.42E-06	1.169281805	0.462	0.157	0.032179755	5.57E-05	4.974676808	4.254472095	red
FSD1	1.45E-06	0.888993085	0.582	0.214	0.032690864	5.63E-05	3.777717647	4.249434231	black
LRP8	1.48E-06	1.016715228	0.571	0.221	0.033468876	5.74E-05	4.311907404	4.241017823	red
MOBP	1.50E-06	1.577685027	0.308	0.064	0.033943357	5.80E-05	6.684170362	4.236695061	red
SLC25A27	1.56E-06	0.843020142	0.78	0.379	0.035202003	5.99E-05	3.559973443	4.222880649	black
COX7C	1.57E-06	0.899822944	0.648	0.257	0.0353792	5.99E-05	3.7998449	4.222880649	black
SORBS1	1.57E-06	0.821745965	0.857	0.479	0.03547301	5.99E-05	3.470135134	4.222880649	black
ATF4	1.68E-06	1.215294667	0.385	0.107	0.037970205	6.38E-05	5.098279727	4.195097589	red
JKAMP	1.69E-06	1.031873434	0.571	0.236	0.038299069	6.41E-05	4.326755769	4.193107047	red
GDE1	1.73E-06	0.931541897	0.615	0.243	0.039025462	6.48E-05	3.901433538	4.188146074	black
GM32509	1.73E-06	1.03905756	0.626	0.286	0.039051482	6.48E-05	4.351724842	4.188146074	red
PGK1	1.80E-06	1.278123161	0.341	0.079	0.040778977	6.74E-05	5.331851529	4.171625779	red
GAS5	1.81E-06	-1.049137727	0.582	0.757	0.040890116	6.74E-05	4.376609988	4.171625779	blue
GPKOW	1.82E-06	1.356772068	0.297	0.057	0.041172119	6.76E-05	5.658229153	4.170360879	red
RCHY1	1.87E-06	0.920494168	0.571	0.221	0.042290798	6.91E-05	3.829652854	4.160431417	black
ZFP398	1.89E-06	0.9294264	0.67	0.321	0.042648358	6.94E-05	3.865002439	4.158481443	black
ATP1B2	1.92E-06	1.426968782	0.308	0.064	0.043307158	7.02E-05	5.926948887	4.153523864	red
XKR4	1.92E-06	-0.532401853	1	0.993	0.043478296	7.02E-05	2.211333326	4.153504189	black
THAP4	1.97E-06	1.264012204	0.352	0.086	0.044523849	7.16E-05	5.239167009	4.14487059	red
TBCB	1.98E-06	1.234672205	0.374	0.1	0.044783293	7.18E-05	5.116515349	4.144027321	red
BTBD9	2.00E-06	0.710202084	0.956	0.721	0.045196114	7.19E-05	2.942626086	4.143364476	black
RPL15	2.00E-06	0.929608855	0.549	0.193	0.045198041	7.19E-05	3.851708305	4.143364476	black
ZBTB16	2.04E-06	1.243016065	0.297	0.057	0.046052976	7.30E-05	5.142217219	4.136887175	red
RFC2	2.11E-06	1.113829353	0.385	0.1	0.04763916	7.52E-05	4.593248732	4.123835234	red
GTF2H5	2.14E-06	1.01777741	0.363	0.093	0.048336825	7.60E-05	4.192397552	4.119169387	red
VTI1B	2.17E-06	1.017571714	0.659	0.314	0.049158529	7.70E-05	4.18577166	4.11349058	red
RPL7	2.20E-06	1.132969681	0.44	0.143	0.049629371	7.74E-05	4.657623006	4.110986449	red
SYCP3	2.22E-06	1.079218298	0.341	0.079	0.050185013	7.80E-05	4.433192207	4.107780804	red
FKBP4	2.25E-06	1.009589266	0.451	0.143	0.050754022	7.86E-05	4.143867126	4.104507909	red
TAF11	2.35E-06	1.340688308	0.264	0.043	0.053149965	8.20E-05	5.478176953	4.086092882	red
DBNDD2	2.42E-06	1.071465647	0.462	0.157	0.054803601	8.43E-05	4.365577757	4.074398248	red
TTLL7	2.44E-06	0.79897667	0.67	0.329	0.055201819	8.46E-05	3.254119709	4.072859486	black
DDX17	2.48E-06	-1.198346474	0.571	0.693	0.056089177	8.56E-05	4.874314325	4.067533415	blue
HBB.BS	2.49E-06	1.330148941	0.275	0.05	0.056309592	8.56E-05	5.410279524	4.067423846	red
MRPS18A	2.59E-06	1.19662513	0.407	0.121	0.058498001	8.86E-05	4.849267241	4.052453118	red
TMSB4X	2.61E-06	0.944615665	0.725	0.357	0.059085707	8.92E-05	3.825404239	4.049693841	black
SPARCL1	2.68E-06	1.473758748	0.363	0.1	0.060473615	9.10E-05	5.955734307	4.041186737	red
CASR	2.76E-06	1.56564127	0.242	0.036	0.062414414	9.35E-05	6.308028887	4.029038457	red
SNCB	2.80E-06	0.665107891	0.802	0.357	0.063366875	9.44E-05	2.677043961	4.024976994	black
PDIA3	2.81E-06	0.822347241	0.56	0.207	0.063566963	9.44E-05	3.309928727	4.024976994	black
KTN1	2.82E-06	0.642458816	0.901	0.557	0.063683162	9.44E-05	2.585881953	4.024976994	black
SHC2	2.84E-06	1.162120546	0.374	0.107	0.064146357	9.48E-05	4.675650128	4.023377906	red
GM15478	2.98E-06	1.151496314	0.385	0.107	0.067265123	9.90E-05	4.610939856	4.004302748	red
ZKSCAN1	3.03E-06	0.857683831	0.473	0.157	0.068517233	0.000100279	3.429696403	3.998788688	black
SLC3A2	3.04E-06	0.763971757	0.582	0.221	0.068748319	0.000100279	3.05496162	3.998788688	black
APPBP2	3.05E-06	0.733621926	0.626	0.243	0.068849336	0.000100279	2.933599061	3.998788688	black
MYO9A	3.31E-06	-0.663250237	0.945	0.907	0.074823115	0.000108599	2.629239233	3.964173831	black
PDE4A	3.35E-06	0.761118897	0.615	0.243	0.075832962	0.000109681	3.013929953	3.959867457	black
TMEM246	3.41E-06	0.789513601	0.484	0.15	0.077036047	0.000111034	3.12216476	3.954542081	black
DDRGK1	3.52E-06	0.902802714	0.549	0.207	0.079517316	0.000114214	3.559100825	3.942279715	black
ANK2	3.60E-06	-0.355406747	1	1	0.081327237	0.000116411	1.39817212	3.934005564	black
XBP1	3.71E-06	0.964285466	0.418	0.121	0.083782601	0.000119514	3.782489518	3.922582732	black
SUMO2	3.81E-06	1.097519226	0.473	0.164	0.086157659	0.000122481	4.293421179	3.911932544	red
WDR34	3.84E-06	1.063136143	0.33	0.079	0.086809826	0.000122729	4.157982963	3.911054094	red
NDUFB9	3.85E-06	1.219546502	0.44	0.15	0.086923423	0.000122729	4.76971234	3.911054094	red
SIRT3	3.97E-06	1.228537604	0.429	0.136	0.089699622	0.000125963	4.790997423	3.899756432	red
NDUFC1	3.97E-06	1.460161016	0.352	0.1	0.089821202	0.000125963	5.694272312	3.899756432	red
SYP	4.02E-06	0.693459998	0.923	0.621	0.090823644	0.00012694	2.701998307	3.89640111	black
H13	4.19E-06	0.706008104	0.736	0.321	0.094678493	0.000131883	2.739177998	3.879810988	black
D130043K22RIK	4.20E-06	0.887904394	0.604	0.271	0.094995664	0.000131883	3.444901223	3.879810988	black
COX5B	4.24E-06	0.845902523	0.571	0.214	0.095766076	0.000132509	3.280201166	3.877753144	black
TTC3	4.33E-06	0.505098956	1	0.957	0.097768145	0.00013483	1.954840397	3.870212704	black
X1700016P03RIK	4.46E-06	1.772292485	0.143	0	0.100914318	0.000138708	6.837323163	3.857897735	red
MLLT11	4.55E-06	1.038834541	0.527	0.214	0.102764636	0.000140785	4.001011525	3.851442521	red
CCDC85A	4.64E-06	-0.844074171	0.802	0.864	0.104950904	0.000143308	3.244394044	3.843730984	black
RAB2A	4.69E-06	0.695329319	0.714	0.357	0.105911928	0.000144146	2.670897969	3.841198546	black
GPRC5B	4.75E-06	1.325192168	0.22	0.029	0.107408131	0.000145704	5.084136659	3.836527851	red
PKIG	4.80E-06	1.025035896	0.484	0.179	0.108579245	0.000146759	3.929366753	3.833394293	red
SRSF2	4.82E-06	-1.094161084	0.593	0.7	0.108893011	0.000146759	4.194350854	3.833394293	blue
JADE1	4.97E-06	0.777523693	0.484	0.164	0.112256859	0.000150803	2.971376128	3.821589177	black
MRPS10	5.09E-06	0.96594766	0.374	0.107	0.115074097	0.000154089	3.682412424	3.8122277	black
SH3BP5	5.17E-06	0.838417373	0.385	0.107	0.116843233	0.000155955	3.191855282	3.807000407	black
RPLP2	5.21E-06	0.730235692	0.692	0.314	0.117733073	0.000156459	2.778984262	3.805599059	black
SYT1	5.22E-06	-0.569720033	0.989	0.993	0.117974694	0.000156459	2.168126022	3.805599059	black
MAPK8IP1	5.30E-06	1.051573229	0.484	0.186	0.119867971	0.000158149	3.996960813	3.800934356	red
SLC35F3	5.31E-06	1.34954116	0.418	0.143	0.120010648	0.000158149	5.12951736	3.800934356	red
X2310058D17RIK	5.39E-06	1.215188555	0.22	0.029	0.121939578	0.000160031	4.612606475	3.795794864	red
CEP78	5.41E-06	1.08855164	0.385	0.114	0.122210348	0.000160031	4.131918724	3.795794864	red
RNF152	5.49E-06	1.103507735	0.418	0.136	0.124020963	0.000161892	4.183150198	3.790775601	red
RPS27A	5.58E-06	0.730567967	0.648	0.279	0.126191835	0.000163757	2.765783723	3.785799336	black
GPATCH8	5.58E-06	0.493816264	0.989	0.829	0.126239197	0.000163757	1.869489284	3.785799336	black
CSNK2A1	5.64E-06	0.593760004	0.582	0.221	0.127534438	0.000164751	2.246296398	3.783172297	black
RNF170	5.68E-06	0.932678275	0.473	0.164	0.128372472	0.000164751	3.52848261	3.783172297	black
MRPS21	5.68E-06	0.986590018	0.352	0.093	0.128449071	0.000164751	3.732440025	3.783172297	black
NFIC	5.69E-06	1.069199492	0.319	0.071	0.128592694	0.000164751	4.044965899	3.783172297	red
SPCS2	5.75E-06	0.785634019	0.615	0.264	0.130066396	0.000166126	2.969352356	3.779561837	black
CEMIP2	5.89E-06	1.109294616	0.308	0.071	0.13314674	0.000169539	4.182851206	3.770730646	red
ATP2B4	6.04E-06	0.903736037	0.615	0.264	0.136515194	0.000173296	3.399141329	3.761210344	black
RIMS2	6.08E-06	-0.646072002	0.967	0.993	0.137457576	0.000173492	2.429695774	3.760719807	black
PCSK1N	6.08E-06	0.655216542	1	0.843	0.137505375	0.000173492	2.464085829	3.760719807	black
NBEA	6.14E-06	-0.514253138	0.978	0.971	0.138754022	0.000174537	1.932620858	3.758111941	black
ACVR2B	6.52E-06	0.942609509	0.352	0.093	0.147420988	0.000184879	3.518867114	3.73311226	black
ATP5B	6.54E-06	0.691563181	0.78	0.364	0.147937641	0.000184968	2.581538255	3.732902976	black
MAP1B	6.61E-06	0.490307166	1	0.914	0.149521831	0.000186388	1.828641372	3.72958321	black
CD9	6.76E-06	1.572534795	0.198	0.021	0.152802451	0.000189907	5.852124912	3.721459729	red
TUBB2A	6.94E-06	0.802958728	0.67	0.3	0.156817975	0.000194316	2.980175333	3.711492547	black
CIRBP	7.12E-06	1.061391501	0.385	0.114	0.160943995	0.000198835	3.92874922	3.701508082	red
NUCB2	7.16E-06	0.932431762	0.341	0.086	0.161880984	0.000199399	3.450256409	3.700277648	black
ABHD16A	7.40E-06	0.821523168	0.648	0.271	0.167183974	0.000205321	3.029420604	3.687565637	black
SLC35B1	7.49E-06	0.924059038	0.505	0.179	0.169334388	0.000206768	3.404710557	3.684516267	black
FAM122A	7.49E-06	1.091717162	0.264	0.05	0.169358201	0.000206768	4.02244964	3.684516267	red
MAGEE1	7.55E-06	1.124444881	0.33	0.086	0.170623186	0.000207702	4.140835645	3.682559914	red
2-Mar	7.73E-06	1.056708203	0.319	0.079	0.174774424	0.000212133	3.881703256	3.673391809	red
MIR99AHG	7.81E-06	-0.580340056	0.945	0.986	0.176639643	0.000213189	2.13056478	3.671235093	black
LGI3	7.82E-06	0.835418832	0.407	0.121	0.176671677	0.000213189	3.067018933	3.671235093	black
ATE1	7.90E-06	0.889104889	0.44	0.143	0.178513423	0.000214787	3.261229444	3.6679918	black
MYO1C	7.96E-06	0.993563261	0.308	0.071	0.179887173	0.000215814	3.642322917	3.665919484	black
LYRM9	8.06E-06	1.166792856	0.231	0.036	0.182297096	0.000218075	4.272087556	3.661393308	red
EIF5A	8.15E-06	0.984417671	0.484	0.179	0.184258852	0.000219789	3.600994394	3.657994466	black
RHEB	8.18E-06	0.714521502	0.571	0.214	0.184884815	0.000219904	2.613553719	3.657767765	black
CALR	8.28E-06	0.826927204	0.681	0.336	0.18705371	0.000221848	3.021546772	3.6539453	black
M6PR	8.33E-06	1.088309463	0.33	0.086	0.18819071	0.00022256	3.97510747	3.652552517	red
TMEM101	8.48E-06	1.337938994	0.198	0.021	0.191744029	0.000226118	4.877676554	3.645664397	red
TIMM17A	8.56E-06	1.159102525	0.341	0.093	0.193490068	0.000227268	4.223144727	3.643460899	red
X5330438D12RIK	8.57E-06	0.815649152	0.429	0.136	0.193814357	0.000227268	2.971785793	3.643460899	black
UNC80	8.74E-06	-0.625410573	0.967	0.957	0.197663265	0.000231129	2.274084136	3.63614597	black
TGOLN1	8.90E-06	0.61222937	0.593	0.243	0.201189375	0.000234591	2.222201928	3.629688538	black
SZRD1	8.94E-06	1.211091019	0.231	0.036	0.202002428	0.000234879	4.39523728	3.629155208	red
NDUFB4	9.04E-06	1.147182552	0.341	0.093	0.204371082	0.000236721	4.159411424	3.625762454	red
SFXN1	9.06E-06	0.922003484	0.495	0.186	0.204727214	0.000236721	3.342965614	3.625762454	black
RETREG2	9.10E-06	1.030201557	0.462	0.164	0.20573315	0.000237224	3.734317674	3.624841807	red
FABP3	9.17E-06	1.06806878	0.319	0.079	0.207347798	0.000238423	3.869240816	3.622651357	red
ATPIF1	9.32E-06	0.722148033	0.835	0.457	0.210594298	0.000241487	2.612085653	3.617105544	black
NDUFC2	9.37E-06	0.860454332	0.538	0.221	0.211719146	0.000241983	3.111588642	3.616215908	black
CHCHD10	9.39E-06	0.715139433	0.538	0.214	0.212306961	0.000241983	2.586098594	3.616215908	black
RAPGEF4OS1	9.41E-06	1.199412257	0.396	0.136	0.21277497	0.000241983	4.337333683	3.616215908	red
GM5141	9.50E-06	0.911238281	0.264	0.05	0.214807273	0.000243626	3.292555125	3.613275686	black
TOMM6	9.57E-06	0.887643571	0.429	0.143	0.216256841	0.000244602	3.205760075	3.611539791	black
ZSCAN22	9.91E-06	1.311026874	0.209	0.029	0.224032882	0.000252709	4.716261378	3.597379636	red
PRDX2	9.97E-06	1.063543792	0.462	0.179	0.22532605	0.000253479	3.824565741	3.596058545	red
B230206L02RIK	1.01E-05	1.473347454	0.154	0.007	0.227710746	0.000255469	5.293239085	3.59266178	red
PEG3	1.02E-05	-0.684766694	0.879	0.9	0.230987563	0.000258447	2.456688778	3.587628896	black
BNIP3L	1.05E-05	1.147727095	0.407	0.136	0.23641883	0.000263813	4.107376071	3.578704458	red
ITM2C	1.05E-05	0.740255982	0.879	0.536	0.237749052	0.000264586	2.648216639	3.57743362	black
CSRP1	1.08E-05	1.483309335	0.209	0.029	0.245016297	0.000271944	5.288769416	3.565520212	red
TEK	1.09E-05	1.296638463	0.132	0	0.24629399	0.000272633	4.621765415	3.564421036	red
SCARB1	1.14E-05	1.078222418	0.385	0.121	0.256792348	0.000283498	3.824939416	3.547449349	red
PXMP4	1.14E-05	0.949806871	0.44	0.15	0.258198503	0.000283671	3.369140606	3.547184917	black
RBM26	1.14E-05	-1.038775177	0.659	0.714	0.258315499	0.000283671	3.684727639	3.547184917	blue
MACROD2	1.15E-05	-0.512098943	1	0.993	0.2591442	0.00028383	1.816384892	3.546941299	black
TMED5	1.17E-05	0.973611166	0.396	0.121	0.265027538	0.00028951	3.44496361	3.538336177	black
CHGB	1.18E-05	0.555137224	0.681	0.307	0.26713978	0.000291052	1.962981874	3.536029995	black
TM2D2	1.19E-05	1.033976823	0.33	0.086	0.269819076	0.00029294	3.653269335	3.533221686	red
ACHE	1.20E-05	0.816054209	0.648	0.314	0.270284207	0.00029294	2.883300428	3.533221686	black
PER2	1.21E-05	1.269478741	0.209	0.029	0.272676652	0.000294763	4.481928787	3.530526854	red
BACE1	1.21E-05	1.298783553	0.308	0.079	0.273833876	0.000295245	4.584468446	3.529817139	red
CD200	1.22E-05	0.70039053	0.769	0.4	0.276672017	0.000297532	2.469903146	3.52646565	black
MRPL40	1.23E-05	1.395563542	0.209	0.029	0.277567223	0.000297724	4.921017134	3.526186367	red
PRR5L	1.25E-05	2.197972946	0.187	0.021	0.282661515	0.000302407	7.735564948	3.519408626	red
SELENOK	1.29E-05	0.795987306	0.692	0.343	0.290943259	0.000309918	2.792922869	3.508753027	black
TXNRD1	1.29E-05	0.857996922	0.418	0.143	0.291744499	0.000309918	3.010499296	3.508753027	black
RRNAD1	1.29E-05	0.723510688	0.615	0.25	0.292019857	0.000309918	2.538620317	3.508753027	black
AMOTL1	1.29E-05	0.97842266	0.637	0.293	0.292670337	0.000309918	3.433043468	3.508753027	black
ATP8B1	1.30E-05	1.60836577	0.22	0.036	0.293415536	0.000309918	5.643358263	3.508753027	red
NDUFA10	1.33E-05	0.884511887	0.56	0.25	0.301206403	0.00031734	3.094443258	3.498475605	black
NDUFS5	1.35E-05	0.623044802	0.56	0.229	0.304055491	0.00031953	2.177845522	3.495487827	black
EIF3M	1.36E-05	0.966775362	0.286	0.064	0.306638452	0.000321431	3.376861412	3.492912155	black
DBP	1.37E-05	1.278262492	0.253	0.05	0.310446548	0.000323854	4.460690082	3.489651076	red
DDX18	1.37E-05	1.0245431	0.374	0.114	0.310509991	0.000323854	3.575297931	3.489651076	red
MRPL11	1.39E-05	1.168847683	0.209	0.029	0.314220374	0.000326902	4.074114603	3.485582137	red
SF3B6	1.40E-05	1.233009213	0.341	0.1	0.316178075	0.000328117	4.295769355	3.483971822	red
HNRNPH3	1.40E-05	0.712734224	0.714	0.393	0.317147151	0.000328301	2.482971561	3.48372714	black
TMEM186	1.41E-05	0.939241398	0.451	0.157	0.318683585	0.000329071	3.271105355	3.482709941	black
GM2516	1.41E-05	1.44190432	0.22	0.036	0.319515533	0.000329112	5.021657672	3.482656653	red
MIR124A.1HG	1.43E-05	-1.394465751	0.429	0.579	0.32337576	0.000332263	4.850673496	3.478517485	blue
NKIRAS1	1.45E-05	0.994464692	0.495	0.2	0.328151971	0.000336338	3.453998226	3.473223589	black
SNHG3	1.48E-05	1.135637339	0.242	0.043	0.335302928	0.000342821	3.934906462	3.46493227	red
MICU2	1.49E-05	0.909569195	0.615	0.279	0.33770245	0.000344426	3.149750604	3.46290378	black
MOG	1.51E-05	1.937464096	0.187	0.021	0.341230139	0.000347171	6.702572494	3.459456363	red
H3F3B	1.55E-05	0.999144259	0.473	0.171	0.35101127	0.000356249	3.445295025	3.44824583	black
ATP5G1	1.73E-05	0.922849085	0.571	0.236	0.390577342	0.000395439	3.140381973	3.402920394	black
GM15398	1.73E-05	1.349657863	0.44	0.186	0.391992281	0.000395906	4.59208656	3.402407889	red
NDN	1.76E-05	0.766838274	0.637	0.293	0.39672611	0.000399715	2.605908175	3.398250014	black
STK19	1.77E-05	1.000074102	0.473	0.179	0.400572947	0.000401881	3.39615403	3.395902388	red
NRIP1	1.77E-05	0.895795763	0.385	0.121	0.400812757	0.000401881	3.042034969	3.395902388	black
NNAT	1.79E-05	1.076838309	0.527	0.236	0.405447154	0.000405548	3.652589696	3.391957422	red
CMIP	1.81E-05	0.608041548	0.835	0.593	0.408057395	0.000407178	2.061391977	3.39021566	black
NRG1	1.81E-05	-0.743198959	0.978	0.964	0.409656091	0.000407437	2.519399925	3.38994006	black
PRXL2A	1.82E-05	1.215386532	0.264	0.057	0.410998814	0.000407437	4.120087494	3.38994006	red
ZSWIM7	1.82E-05	1.244012434	0.187	0.021	0.411261017	0.000407437	4.217127586	3.38994006	red
ZFP408	1.83E-05	1.141399493	0.275	0.064	0.413183975	0.000408367	3.868145131	3.388949403	red
ABLIM3	1.83E-05	0.645623932	0.747	0.386	0.414296086	0.000408494	2.187899967	3.388814847	black
RPL35A	1.89E-05	0.79340751	0.593	0.271	0.426999529	0.000420021	2.679121859	3.376728637	black
STXBP3	1.92E-05	1.027754795	0.297	0.071	0.432964434	0.000424882	3.46531345	3.371731727	red
CCDC117	1.93E-05	1.19269978	0.286	0.071	0.436806395	0.000427641	4.018110682	3.368920451	red
SLC25A3	1.94E-05	0.73831706	0.714	0.364	0.438195967	0.000427992	2.487068369	3.368564136	black
CISD2	2.00E-05	0.796424778	0.484	0.179	0.452881941	0.000440257	2.673035783	3.3562941	black
SWI5	2.01E-05	0.706830251	0.484	0.171	0.453273843	0.000440257	2.372330201	3.3562941	black
SRP14	2.01E-05	0.972022251	0.44	0.164	0.453934563	0.000440257	3.262392547	3.3562941	black
BC005624	2.02E-05	0.725123644	0.396	0.121	0.457414279	0.000442534	2.432103549	3.354053576	black
CPNE7	2.03E-05	-0.776103132	0.835	0.829	0.458414622	0.000442534	2.603091484	3.354053576	black
RPL13	2.04E-05	0.562832662	0.857	0.514	0.46053852	0.000443553	1.88720881	3.353054892	black
VMP1	2.12E-05	0.849467703	0.692	0.35	0.479838391	0.000460647	2.834360833	3.336631664	black
CDK8	2.13E-05	0.702709824	0.725	0.379	0.480507106	0.000460647	2.34468385	3.336631664	black
TMEM237	2.17E-05	0.767016386	0.363	0.107	0.490388538	0.000469037	2.553238778	3.328793001	black
KCNB1	2.19E-05	0.660322634	0.505	0.186	0.493979476	0.000471385	2.196645077	3.326623934	black
X5430405H02RIK	2.19E-05	0.914893865	0.374	0.114	0.495138539	0.000471408	3.043488986	3.32660334	black
ST3GAL5	2.20E-05	1.235514528	0.352	0.107	0.498416261	0.000473442	4.107755696	3.324732817	red
YIF1B	2.23E-05	1.203117406	0.22	0.036	0.503302723	0.000476993	3.996140524	3.321488413	red
LGMN	2.23E-05	0.706888368	0.538	0.214	0.505046101	0.000477395	2.34766275	3.32112234	black
ARFGAP2	2.24E-05	0.944642737	0.308	0.079	0.506027267	0.000477395	3.137274097	3.32112234	black
TMEM9	2.29E-05	0.78781283	0.505	0.193	0.517808113	0.000487401	2.609325367	3.312113321	black
BLOC1S2	2.31E-05	1.005810341	0.363	0.114	0.522155199	0.000490381	3.328695372	3.309466245	red
NCEH1	2.33E-05	0.838418786	0.516	0.214	0.525790608	0.000492133	2.773420199	3.307917528	black
ABHD3	2.33E-05	0.861096103	0.253	0.05	0.52639169	0.000492133	2.848434891	3.307917528	black
ZMYM6	2.34E-05	0.983756662	0.418	0.143	0.529676063	0.000494091	3.25248963	3.306193246	black
CNPY2	2.40E-05	1.24634469	0.33	0.1	0.541910598	0.00050437	4.109511024	3.297250797	red
RAB26OS	2.41E-05	-1.496316964	0.308	0.514	0.545560627	0.000506631	4.93082539	3.295308086	blue
EID1	2.44E-05	0.769450128	0.44	0.164	0.551463577	0.00051097	2.532725705	3.291604763	black
CRHBP	2.53E-05	2.326642187	0.143	0.007	0.571892089	0.000528718	7.623884893	3.276775834	red
ARFGAP1	2.56E-05	0.853393569	0.495	0.207	0.577935017	0.000533117	2.793308277	3.273177087	black
OSTC	2.56E-05	0.74947895	0.407	0.136	0.579472771	0.000533351	2.453034929	3.272987091	black
PPP1R11	2.57E-05	1.008305696	0.341	0.107	0.581719572	0.000534234	3.299446808	3.272268341	red
RPL23A	2.64E-05	0.888428912	0.604	0.271	0.596865762	0.000546565	2.898373189	3.262358022	black
CLDN10	2.65E-05	1.413374783	0.121	0	0.598456048	0.000546565	4.610934561	3.262358022	red
PGP	2.65E-05	0.939448781	0.363	0.114	0.59909674	0.000546565	3.064818267	3.262358022	black
CISD1	2.68E-05	0.96527421	0.429	0.15	0.606686787	0.000552276	3.144712685	3.257843889	black
BOD1L	2.72E-05	0.700132514	0.736	0.379	0.614268997	0.000555973	2.278893902	3.254946536	black
GFRA2	2.72E-05	1.450818198	0.198	0.029	0.614675827	0.000555973	4.722335666	3.254946536	red
EML6	2.72E-05	-0.76001295	0.879	0.836	0.614765846	0.000555973	2.473801518	3.254946536	black
POMP	2.73E-05	1.175411901	0.33	0.1	0.617233217	0.000556991	3.824969135	3.254152124	red
COX7A2	2.79E-05	0.891968773	0.495	0.207	0.629807756	0.000567105	2.895630788	3.246336503	black
WASL	2.84E-05	0.760326603	0.473	0.186	0.64154698	0.000576425	2.462893343	3.239257093	black
FUCA2	2.88E-05	0.885181971	0.319	0.086	0.651263412	0.000583891	2.862384519	3.233667893	black
ATP5J2	2.89E-05	0.927745073	0.484	0.193	0.652895078	0.000584093	2.999880548	3.233518168	black
GM20642	2.90E-05	0.770677054	0.615	0.293	0.656068193	0.000585669	2.491096089	3.232347552	black
CALB2	2.95E-05	0.710383215	0.374	0.114	0.666491222	0.000593697	2.292005314	3.226435065	black
RPS9	3.00E-05	0.830782787	0.571	0.25	0.678298848	0.000602921	2.67490406	3.219739383	black
FAM155A	3.05E-05	-0.498144619	0.989	1	0.688769662	0.000609393	1.601586108	3.215102699	black
CNBP	3.05E-05	0.728783276	0.418	0.136	0.689063871	0.000609393	2.343113078	3.215102699	black
SLC32A1	3.06E-05	1.743278164	0.264	0.064	0.691589582	0.000609393	5.604818331	3.215102699	red
GM26917	3.06E-05	-1.120773822	0.462	0.629	0.692792077	0.000609393	3.603402941	3.215102699	blue
NDUFS7	3.07E-05	0.882980031	0.505	0.207	0.692919658	0.000609393	2.838871482	3.215102699	black
UNC13C	3.19E-05	0.897941981	0.538	0.25	0.721453237	0.000633096	2.872094591	3.198530253	black
FGF1	3.20E-05	1.088017236	0.297	0.079	0.722922382	0.000633096	3.480056046	3.198530253	red
ARGLU1	3.26E-05	-0.750137545	0.758	0.814	0.737421569	0.000644434	2.393554898	3.190821356	black
RPS11	3.42E-05	0.62403842	0.615	0.271	0.7722421	0.000673446	1.979260822	3.171697061	black
ZCCHC12	3.44E-05	0.927122371	0.484	0.2	0.778337177	0.000676101	2.938967215	3.169988457	black
SOX2OT	3.44E-05	1.04246691	0.33	0.1	0.778543748	0.000676101	3.304608071	3.169988457	red
PHACTR3	3.48E-05	0.599728545	0.703	0.329	0.78719414	0.000682186	1.898798894	3.166097243	black
NAP1L1	3.55E-05	0.728317631	0.648	0.314	0.802130041	0.000693372	2.300779867	3.159033599	black
PRICKLE1	3.56E-05	0.658467763	0.846	0.614	0.804718483	0.000693372	2.080121788	3.159033599	black
YIPF3	3.57E-05	1.041995138	0.297	0.079	0.806174038	0.000693372	3.291697653	3.159033599	red
MPC2	3.57E-05	0.917371369	0.473	0.193	0.806783697	0.000693372	2.898006976	3.159033599	black
UBE2I	3.63E-05	1.141513306	0.363	0.121	0.820511833	0.000703714	3.598739524	3.152604095	red
SIPA1L2	3.68E-05	1.224217139	0.209	0.036	0.832651663	0.000711186	3.853855749	3.148016498	red
EEF1AKMT1	3.68E-05	1.148572019	0.209	0.036	0.832651663	0.000711186	3.615723666	3.148016498	red
HYAL1	3.74E-05	1.321585832	0.176	0.021	0.844474304	0.000719803	4.153461587	3.142786104	red
CMAS	3.76E-05	0.705814118	0.44	0.157	0.850824415	0.00072373	2.216555216	3.14042346	black
GM2694	3.81E-05	1.423792063	0.209	0.036	0.860628413	0.000730572	4.465491389	3.136336761	red
TVP23B	3.82E-05	0.967462138	0.374	0.129	0.863521693	0.000731532	3.033735275	3.13576641	black
ARL2	3.84E-05	0.782141741	0.396	0.129	0.867598511	0.000733489	2.451706409	3.134606276	black
EBF1	3.87E-05	0.893013691	0.637	0.364	0.873838827	0.000737263	2.797255857	3.132377347	black
MANBA	3.90E-05	0.867173524	0.385	0.129	0.882136486	0.000742598	2.713599605	3.129246373	black
RPS6	3.91E-05	0.745046339	0.626	0.271	0.883739278	0.000742598	2.331433555	3.129246373	black
ARMC6	3.92E-05	0.90465773	0.297	0.079	0.886413877	0.00074334	2.830504175	3.128812235	black
CDC37L1	4.00E-05	0.528228443	0.582	0.25	0.903043893	0.000755759	1.648926571	3.121616399	black
ALG2	4.01E-05	0.93973404	0.451	0.171	0.905330894	0.000756149	2.933278907	3.12139263	black
NDUFA6	4.06E-05	0.838183205	0.516	0.207	0.918265387	0.000765412	2.611866632	3.116104711	black
YEATS4	4.17E-05	1.25282377	0.176	0.021	0.942570237	0.000784097	3.890807593	3.105630406	red
FABP5	4.19E-05	0.731147098	0.407	0.136	0.94785361	0.00078599	2.269906667	3.10458275	black
DSCAM	4.20E-05	-0.350565043	0.989	0.993	0.948633721	0.00078599	1.088358185	3.10458275	black
SCARB2	4.21E-05	0.766669321	0.495	0.207	0.95264685	0.000787743	2.379446682	3.103615364	black
FNDC5	4.27E-05	0.779222435	0.33	0.093	0.96410344	0.000795632	2.415034692	3.099287935	black
ALKBH1	4.30E-05	0.931755319	0.374	0.129	0.972819384	0.000801232	2.884939861	3.096241903	black
SAT2	4.32E-05	1.060549046	0.264	0.064	0.977126096	0.000801991	3.283280222	3.09583063	red
UGT8A	4.32E-05	0.802420043	0.176	0.021	0.977605123	0.000801991	2.484156547	3.09583063	black
X2210016L21RIK	4.36E-05	0.603864641	0.516	0.2	0.9860452	0.000807319	1.867725991	3.092954718	black
LPIN2	4.40E-05	0.791271841	0.571	0.25	0.994393369	0.000811786	2.445471749	3.090558291	black
RPS17	4.40E-05	0.600982468	0.538	0.214	0.995412462	0.000811786	1.857371349	3.090558291	black
OAZ1	4.46E-05	0.794714231	0.714	0.4	1	0.000820528	2.452414035	3.085906783	black
ERLEC1	4.51E-05	0.767263006	0.56	0.257	1	0.000828154	2.364619202	3.081888719	black
TMSB15B2	4.56E-05	1.020173638	0.209	0.036	1	0.000834425	3.140719286	3.078612471	red
ATP5MPL	4.56E-05	0.778171411	0.549	0.236	1	0.000834425	2.39568821	3.078612471	black
TMEM127	4.57E-05	0.755460368	0.429	0.157	1	0.000834425	2.325769712	3.078612471	black
SOCS2	4.63E-05	0.758599752	0.484	0.193	1	0.000843443	2.331893526	3.073944486	black
CHGA	4.68E-05	0.566215416	0.626	0.279	1	0.00085177	1.738098675	3.069677418	black
CCDC93	4.71E-05	0.843646001	0.385	0.129	1	0.000855432	2.588149473	3.067814544	black
CYB561D2	4.82E-05	1.089098211	0.176	0.021	1	0.000873698	3.331157839	3.058638611	red
WDR47	4.84E-05	0.685447044	0.714	0.371	1	0.000874944	2.096110535	3.058019659	black
POLR2G	4.85E-05	0.858403314	0.275	0.064	1	0.000875686	2.624698193	3.057651514	black
AKR1A1	4.87E-05	0.59779479	0.626	0.279	1	0.000876829	1.827509632	3.057085247	black
RP9	4.90E-05	0.788460182	0.604	0.314	1	0.000880205	2.409074025	3.055416217	black
PSMB5	4.93E-05	0.967497272	0.352	0.114	1	0.000883603	2.954487875	3.053742849	black
NLGN1	5.06E-05	-0.484226703	1	0.993	1	0.000904115	1.473877725	3.043776225	black
RPL37A	5.06E-05	0.685233568	0.648	0.329	1	0.000904115	2.085697642	3.043776225	black
GLT8D1	5.08E-05	0.731693631	0.604	0.279	1	0.000905703	2.226554273	3.043014424	black
ERG28	5.12E-05	0.728797641	0.462	0.171	1	0.000911126	2.215852085	3.040421592	black
CNTN1	5.14E-05	-0.576161446	1	0.986	1	0.000913988	1.750989046	3.039059725	black
NRG3OS	5.28E-05	0.87526975	0.538	0.243	1	0.000936752	2.650645552	3.028375598	black
DNM2	5.33E-05	0.810713135	0.571	0.264	1	0.000944192	2.45235848	3.024939862	black
COX6C	5.34E-05	0.760990566	0.769	0.45	1	0.000944192	2.301950699	3.024939862	black
ATP5L	5.39E-05	0.613272868	0.615	0.279	1	0.000949901	1.853507771	3.022321497	black
SCN1B	5.43E-05	0.918364503	0.407	0.15	1	0.00095616	2.772973641	3.019469539	black
MAG	5.47E-05	1.550479563	0.253	0.064	1	0.000957019	4.681020773	3.019079313	red
PPT1	5.47E-05	0.748531772	0.637	0.321	1	0.000957019	2.259876788	3.019079313	black
NEDD8	5.47E-05	1.066950311	0.451	0.186	1	0.000957019	3.221207613	3.019079313	red
TPT1	5.48E-05	0.848410617	0.462	0.186	1	0.000957019	2.561418943	3.019079313	black
PRDX1	5.49E-05	0.674026069	0.385	0.129	1	0.000957019	2.034938162	3.019079313	black
OPALIN	5.56E-05	1.311613509	0.154	0.014	1	0.000966504	3.954247442	3.014796216	red
ADIPOR1	5.56E-05	0.726612637	0.374	0.121	1	0.000966504	2.190589028	3.014796216	black
HSPA9	5.63E-05	0.831584651	0.44	0.164	1	0.000977059	2.503135548	3.010079062	black
BCS1L	5.67E-05	0.508122156	0.308	0.086	1	0.00098093	1.528615301	3.008361835	black
SELENOT	5.70E-05	0.843225078	0.451	0.179	1	0.000984838	2.535270312	3.006635332	black
HMGCR	5.85E-05	0.809581621	0.56	0.271	1	0.0010079	2.425978125	2.996582508	black
RWDD3	5.86E-05	0.605301264	0.253	0.057	1	0.0010079	1.81383518	2.996582508	black
SSR2	5.87E-05	0.782599967	0.429	0.164	1	0.0010079	2.345125371	2.996582508	black
DNAJC8	5.92E-05	0.790863519	0.505	0.221	1	0.001015097	2.367444023	2.993492513	black
NME1	5.99E-05	0.895042708	0.418	0.157	1	0.001025128	2.675481101	2.989221717	black
TSN	6.00E-05	0.69986107	0.582	0.264	1	0.001025128	2.092039909	2.989221717	black
CTSO	6.01E-05	1.190555912	0.154	0.014	1	0.001025128	3.558835588	2.989221717	red
RANBP1	6.03E-05	0.837999392	0.341	0.107	1	0.001025345	2.50488895	2.989129793	black
BC051142	6.03E-05	0.7871742	0.253	0.057	1	0.001025345	2.352965852	2.989129793	black
KCNA1	6.05E-05	1.374910927	0.132	0.007	1	0.001026594	4.109060325	2.988601111	red
H2AFY	6.09E-05	0.874904649	0.462	0.186	1	0.001032225	2.612662563	2.986225489	black
EIF4H	6.14E-05	0.672125249	0.473	0.193	1	0.001037685	2.005577765	2.983934569	black
SF3B3	6.15E-05	0.745777848	0.484	0.193	1	0.001037685	2.2253523	2.983934569	black
ATCAY	6.16E-05	0.759901859	0.67	0.364	1	0.001037685	2.267497425	2.983934569	black
MORF4L1	6.17E-05	0.765603046	0.802	0.5	1	0.001037685	2.284509396	2.983934569	black
NYAP2	6.22E-05	-0.763318604	0.879	0.843	1	0.001043254	2.275918222	2.981609791	black
ELAVL2	6.25E-05	-0.629486998	0.923	0.871	1	0.001047086	1.875882365	2.980017651	black
ATP6V1G2	6.26E-05	0.801269839	0.418	0.157	1	0.001047299	2.387727431	2.979929252	black
PNMAL2	6.36E-05	0.566112214	0.451	0.164	1	0.001061532	1.683655504	2.974066737	black
RRS1	6.41E-05	1.187446092	0.11	0	1	0.00106426	3.530220425	2.972952162	red
TRIM59	6.41E-05	1.450562631	0.11	0	1	0.00106426	4.312453309	2.972952162	red
GM16168	6.41E-05	1.824218225	0.11	0	1	0.00106426	5.423313517	2.972952162	red
SCN3B	6.43E-05	0.714450316	0.538	0.236	1	0.001066285	2.123436832	2.972126661	black
STXBP6	6.66E-05	0.662359721	0.297	0.086	1	0.001102715	1.958953248	2.957536799	black
X2410004B18RIK	6.73E-05	1.318504089	0.132	0.007	1	0.001109905	3.895802759	2.954714203	red
PLLP	6.73E-05	1.297517649	0.132	0.007	1	0.001109905	3.833793825	2.954714203	red
AP2M1	6.95E-05	0.953661288	0.396	0.15	1	0.001142667	2.805748058	2.942080268	black
GM15680	6.95E-05	0.92025509	0.187	0.029	1	0.001142667	2.707464341	2.942080268	black
GM14204	7.02E-05	1.32660803	0.132	0.007	1	0.001151961	3.898320081	2.938562102	red
D330023K18RIK	7.04E-05	0.946658797	0.429	0.171	1	0.001152464	2.781636127	2.938372448	black
SELENOF	7.07E-05	0.754629898	0.495	0.207	1	0.001156479	2.216244001	2.936862172	black
TPRGL	7.09E-05	0.672195231	0.286	0.079	1	0.001157434	1.973903814	2.936503746	black
ELOB	7.11E-05	0.679976926	0.473	0.193	1	0.001157638	1.996702731	2.936427186	black
PSMD5	7.13E-05	0.514788143	0.374	0.129	1	0.001158751	1.511422995	2.936009724	black
NTN3	7.26E-05	0.979070841	0.22	0.043	1	0.001177123	2.867872978	2.929178216	black
RPL37	7.26E-05	0.768840086	0.681	0.357	1	0.001177123	2.252069631	2.929178216	black
CXXC5	7.28E-05	0.927803891	0.264	0.064	1	0.001177488	2.717578076	2.92904363	black
TTC19	7.33E-05	0.653717951	0.791	0.464	1	0.001183808	1.913248551	2.9267187	black
ZFP335OS	7.52E-05	0.834904609	0.363	0.121	1	0.001212225	2.434929831	2.916416805	black
PRKACA	7.54E-05	0.661413497	0.56	0.25	1	0.001212819	1.928816662	2.916203963	black
KCNIP1	7.65E-05	0.618989181	0.462	0.179	1	0.001228628	1.801617372	2.910579742	black
HBA.A1	7.76E-05	1.2309981	0.198	0.036	1	0.001244151	3.576205575	2.905126803	red
STMN4	7.77E-05	0.559133887	0.538	0.243	1	0.001244666	1.624254314	2.904947013	black
PLPBP	7.85E-05	0.822136838	0.396	0.15	1	0.001255429	2.385189877	2.901207884	black
GRP	7.90E-05	2.136390704	0.22	0.05	1	0.001259937	6.194788127	2.89965132	red
ZCCHC18	7.91E-05	0.542298056	0.912	0.6	1	0.001259937	1.572475274	2.89965132	black
VPS29	8.04E-05	1.005355369	0.33	0.107	1	0.001278065	2.908942626	2.893447149	red
GALNT2	8.11E-05	0.81614111	0.407	0.15	1	0.001288304	2.358632883	2.889981711	black
FBXO9	8.18E-05	0.668908919	0.33	0.1	1	0.00129683	1.931218308	2.887116994	black
NOB1	8.20E-05	0.520788555	0.418	0.143	1	0.001298197	1.503339191	2.886659425	black
GAPDH	8.30E-05	0.671825972	0.824	0.464	1	0.001311723	1.936308518	2.88215788	black
TRP53INP2	8.33E-05	0.869362917	0.33	0.107	1	0.001314355	2.504884369	2.881287343	black
STMN3	8.44E-05	0.490827449	0.967	0.743	1	0.001328764	1.411890683	2.876552004	black
MRPS12	8.46E-05	1.270086516	0.286	0.086	1	0.001329363	3.653221582	2.876356482	red
ELFN1	8.55E-05	0.774715301	0.308	0.086	1	0.001339284	2.225855617	2.873127216	black
AY036118	8.55E-05	1.155034891	0.341	0.121	1	0.001339284	3.318562181	2.873127216	red
MAN2B1	8.59E-05	0.821344123	0.33	0.1	1	0.001341549	2.359223435	2.872393397	black
DTNBOS	8.59E-05	0.939979806	0.242	0.057	1	0.001341549	2.699991787	2.872393397	black
NICN1	8.63E-05	0.654925916	0.297	0.086	1	0.001343348	1.880823855	2.871811619	black
MAGI2	8.63E-05	-0.35172726	1	1	1	0.001343348	1.010094433	2.871811619	black
ST13	8.76E-05	0.877231697	0.604	0.3	1	0.001356723	2.51546954	2.867508719	black
TMCO3	8.76E-05	0.740523754	0.44	0.171	1	0.001356723	2.12345832	2.867508719	black
NDUFB2	8.77E-05	0.759098566	0.374	0.129	1	0.001356723	2.176721755	2.867508719	black
RNASEK	8.78E-05	0.627068236	0.824	0.529	1	0.001356723	1.798123634	2.867508719	black
MIF	8.91E-05	0.84890406	0.56	0.264	1	0.001374473	2.429447904	2.861863924	black
MIR100HG	8.92E-05	-0.437618004	0.978	0.943	1	0.001374473	1.252403179	2.861863924	black
X1700025G04RIK	8.98E-05	0.669894926	0.681	0.357	1	0.001381877	1.915584989	2.859530525	black
GSTCD	9.04E-05	0.913135455	0.341	0.114	1	0.001387137	2.609632085	2.85788058	black
PLEKHH2	9.05E-05	1.021900989	0.429	0.179	1	0.001387137	2.920470992	2.85788058	red
GART	9.24E-05	0.840372599	0.44	0.171	1	0.001414493	2.394556982	2.849399163	black
TMBIM1	9.30E-05	1.125872968	0.165	0.021	1	0.001421129	3.205772833	2.847366376	red
CANX	9.35E-05	0.721388918	0.813	0.514	1	0.001426989	2.052769336	2.845579249	black
PTPN11	9.46E-05	0.72212161	0.593	0.257	1	0.001441626	2.051654034	2.841147537	black
FBXW17	9.56E-05	1.016751761	0.198	0.036	1	0.00145266	2.885374641	2.837835892	red
PSMA7	9.57E-05	0.698942341	0.505	0.214	1	0.00145266	1.983483662	2.837835892	black
EMC3	9.59E-05	0.81599638	0.418	0.157	1	0.001453338	2.315498515	2.837633319	black
ENPP2	9.66E-05	0.809930433	0.484	0.2	1	0.001461949	2.29620764	2.835067736	black
TNRC6A	9.75E-05	-0.56562112	0.901	0.9	1	0.001472765	1.601763578	2.831866634	black
DNPEP	9.77E-05	0.934030273	0.242	0.057	1	0.00147411	2.644678819	2.831470132	black
MB21D2	9.81E-05	1.191198354	0.209	0.043	1	0.001477375	3.371698103	2.830509371	red
DOCK10	9.83E-05	0.934995684	0.451	0.2	1	0.001477375	2.646514045	2.830509371	black
RPL18A	9.84E-05	0.601593146	0.56	0.257	1	0.001477375	1.702815036	2.830509371	black
RIMS1	9.91E-05	-0.490154061	0.989	0.993	1	0.001484912	1.386302316	2.828299156	black
MTTP	0.000100245	0.625674133	0.505	0.207	1	0.001500158	1.766818071	2.823863056	black
GM36560	0.000101699	1.071381541	0.165	0.021	1	0.0015195	3.019473779	2.818299238	red
ACTL6A	0.000101871	0.894865535	0.297	0.086	1	0.00151965	2.521960425	2.818256293	black
SCRN1	0.000103277	0.591352228	0.516	0.214	1	0.001537437	1.663593601	2.81320256	black
ANP32A	0.000103555	0.757272696	0.33	0.107	1	0.001537437	2.130361486	2.81320256	black
GM10827	0.000103555	1.096541464	0.33	0.107	1	0.001537437	3.084793254	2.81320256	red
PSMD9	0.000103771	0.663499113	0.44	0.171	1	0.001538198	1.866414797	2.812987629	black
TSPAN7	0.00010442	0.552355753	0.868	0.579	1	0.001544765	1.55274809	2.811137719	black
MT1	0.000104543	0.686261066	0.407	0.157	1	0.001544765	1.929174367	2.811137719	black
PFDN2	0.000105082	0.811803151	0.473	0.193	1	0.00154832	2.281280026	2.810139408	black
COPS8	0.000105113	0.888224432	0.286	0.079	1	0.00154832	2.49603448	2.810139408	black
PIGP	0.000105342	0.909059553	0.374	0.143	1	0.001549257	2.55434518	2.809876614	black
H2AFV	0.000106485	0.834478683	0.286	0.079	1	0.001563615	2.341438788	2.805870102	black
TRIP12	0.000107024	-0.919548788	0.648	0.693	1	0.001569071	2.578743413	2.804357361	black
PHAX	0.00010731	1.079355407	0.253	0.064	1	0.001569388	3.026803777	2.804269805	red
NME7	0.00010738	0.982116261	0.44	0.186	1	0.001569388	2.754118975	2.804269805	black
ADD3	0.000108119	0.70667152	0.352	0.114	1	0.001577729	1.980070707	2.801967606	black
QTRT1	0.000108339	0.898872025	0.462	0.2	1	0.001578108	2.518516617	2.801863388	black
NEMF	0.000108481	0.522989068	0.78	0.414	1	0.001578108	1.465343922	2.801863388	black
EBF3	0.000110636	0.895606499	0.495	0.243	1	0.001606962	2.502319436	2.79399428	black
X3110021N24RIK	0.000111538	0.771624584	0.462	0.186	1	0.001617562	2.153711502	2.791139041	black
NME2	0.000111918	0.693422589	0.429	0.164	1	0.001620569	1.93487962	2.790332547	black
MRPS5	0.000112973	0.916359667	0.418	0.164	1	0.001633315	2.553830205	2.786929956	black
NDUFA8	0.000113178	0.896678905	0.308	0.093	1	0.001633767	2.498873746	2.786810007	black
CADPS	0.000113561	-0.514684117	1	0.971	1	0.00163678	1.433914975	2.786009765	black
WDR18	0.000113817	1.049809958	0.363	0.136	1	0.001637949	2.924455171	2.785699591	red
COPS6	0.000114973	1.070945384	0.264	0.071	1	0.001651729	2.979435614	2.782061214	red
ATP5G2	0.000115126	0.64038753	0.352	0.121	1	0.001651729	1.78159731	2.782061214	black
COG4	0.000115363	0.833244618	0.484	0.214	1	0.001652594	2.31794801	2.78183376	black
LARS	0.000116239	0.710262343	0.615	0.3	1	0.001662608	1.973968295	2.779210124	black
EXT2	0.00011682	0.698689468	0.538	0.243	1	0.001668373	1.940754537	2.77770687	black
KCNH1	0.000117098	0.625772502	0.297	0.086	1	0.001669204	1.738077226	2.777490575	black
COL16A1	0.000117234	1.315526461	0.143	0.014	1	0.001669204	3.653862347	2.777490575	red
ATPAF2	0.000117656	0.909085307	0.198	0.036	1	0.001672678	2.524154963	2.77658757	black
DFFA	0.00011814	0.899198028	0.253	0.064	1	0.001677018	2.495690108	2.775462167	black
CLPP	0.000118907	0.663892437	0.681	0.35	1	0.001682945	1.84159121	2.773930092	black
PRPF31	0.000118916	0.852479538	0.308	0.093	1	0.001682945	2.364718642	2.773930092	black
NEU1	0.000119194	0.820265379	0.319	0.1	1	0.001683401	2.275262309	2.773812435	black
ROBO1	0.000119307	-0.521297559	0.967	0.986	1	0.001683401	1.445981651	2.773812435	black
PPM1L	0.00011973	0.672537514	0.703	0.393	1	0.001686828	1.864898933	2.772929234	black
SRP9	0.000120772	0.668005374	0.363	0.121	1	0.001696849	1.85061325	2.770356831	black
RANGAP1	0.000120803	0.691540397	0.527	0.25	1	0.001696849	1.915813662	2.770356831	black
NPHP4	0.000121163	0.767571034	0.286	0.079	1	0.001699361	2.125952418	2.769714236	black
GM42851	0.000121419	0.977149135	0.253	0.064	1	0.001700408	2.706162599	2.769446855	black
KRCC1	0.000123399	0.7559927	0.308	0.093	1	0.001725565	2.088859761	2.763068693	black
SNAP25	0.000125324	0.350622031	1	0.957	1	0.001749878	0.966662172	2.756992109	black
PHF20	0.000126251	0.630739437	0.527	0.264	1	0.001760191	1.737333987	2.754440082	black
SLC35A2	0.000126498	0.950255325	0.253	0.064	1	0.001761028	2.617225346	2.754233813	black
FAF1	0.000127061	-0.767788717	0.758	0.75	1	0.001766248	2.113682733	2.752948418	black
LRRC57	0.000127335	1.222031382	0.176	0.029	1	0.001767438	3.36383169	2.752655733	red
GSE1	0.000128567	0.583199154	0.736	0.407	1	0.001781904	1.603281989	2.749115766	black
WHAMM	0.000130559	0.769484806	0.44	0.171	1	0.001806831	2.110760214	2.743082382	black
SLC39A11	0.000131676	1.188742105	0.341	0.121	1	0.00181671	3.258002598	2.740714394	red
EMC10	0.000131973	0.552050964	0.626	0.286	1	0.00181671	1.513014023	2.740714394	black
FDPS	0.000131981	0.798330316	0.44	0.186	1	0.00181671	2.187995387	2.740714394	black
ACTR1A	0.000132047	0.791363643	0.473	0.186	1	0.00181671	2.168901728	2.740714394	black
DYNLL1	0.000133381	0.586960684	0.527	0.229	1	0.001832371	1.606503476	2.736986515	black
GM42439	0.000134093	1.003269726	0.143	0.014	1	0.001839469	2.744251282	2.735307576	red
METTL16	0.000135904	0.632943656	0.516	0.214	1	0.001861594	1.728009043	2.730115116	black
SPR	0.00013668	1.005872983	0.143	0.014	1	0.001869493	2.744299199	2.728276081	red
TMED2	0.000137925	0.62387173	0.593	0.264	1	0.001883768	1.700033409	2.724972664	black
GM47438	0.000138461	1.032980853	0.176	0.029	1	0.001888348	2.813755072	2.723917935	red
MESD	0.000140304	0.63572565	0.429	0.157	1	0.001910698	1.728415978	2.718807993	black
MID1IP1	0.000140938	1.246563494	0.121	0.007	1	0.001916557	3.387509214	2.717478275	red
ATAT1	0.000143857	0.776338956	0.571	0.286	1	0.00195341	2.103262538	2.70920649	black
THY1	0.000144599	0.80647993	0.604	0.307	1	0.001959594	2.183813656	2.707833853	black
GM16196	0.00014473	-2.190376434	0.066	0.25	1	0.001959594	5.931175457	2.707833853	blue
FXN	0.00014557	1.290679121	0.176	0.029	1	0.001968132	3.492507643	2.705945719	red
PPP4C	0.000145812	0.897698147	0.209	0.043	1	0.001968569	2.429035952	2.705849356	black
PDHB	0.000146342	0.692955199	0.374	0.136	1	0.001972618	1.874413953	2.704956909	black
TEF	0.000146533	0.599999497	0.626	0.3	1	0.001972618	1.622972785	2.704956909	black
PSMD7	0.000148925	0.506445077	0.549	0.236	1	0.002001952	1.366665482	2.698546287	black
PSMB6	0.000150033	0.716921735	0.385	0.136	1	0.00201328	1.932889621	2.696095721	black
NCL	0.000150197	0.655868378	0.418	0.164	1	0.00201328	1.768283927	2.696095721	black
NEMP1	0.000150499	1.059980239	0.176	0.029	1	0.002014448	2.857541321	2.695843956	red
AIDA	0.000150987	0.854612871	0.385	0.143	1	0.002018105	2.303229677	2.695056153	black
HJURP	0.000152007	-1.906726374	0.143	0.329	1	0.002028853	5.134336283	2.692749391	blue
TMCO1	0.000153136	0.622367497	0.33	0.107	1	0.002041013	1.674264595	2.690154296	black
GM26981	0.000153364	1.221669801	0.121	0.007	1	0.002041159	3.286442256	2.690123185	red
ZFP667	0.00015375	1.20447795	0.22	0.05	1	0.002042647	3.23981284	2.689806683	red
COPRS	0.000153911	0.91542699	0.264	0.071	1	0.002042647	2.462321635	2.689806683	black
NDUFAF7	0.000155865	0.620834673	0.473	0.186	1	0.002061197	1.667487727	2.685880476	black
SLIRP	0.000155914	0.848524271	0.451	0.193	1	0.002061197	2.279034772	2.685880476	black
RIT2	0.000155968	-0.535756782	0.967	0.929	1	0.002061197	1.438978682	2.685880476	black
SDF2	0.00015624	0.366260461	0.593	0.271	1	0.002061879	0.983679214	2.685736845	black
MAP2	0.000157436	-0.321236794	1	0.964	1	0.002074754	0.861889066	2.683033459	black
TCF7L2	0.000157726	1.080213356	0.242	0.064	1	0.002075651	2.898045721	2.682845665	red
NSMCE3	0.000158083	0.574015918	0.297	0.086	1	0.002077446	1.539780685	2.682470361	black
RPL27A	0.000158633	0.627656258	0.725	0.436	1	0.002081757	1.683104193	2.681570002	black
CHN1	0.00016013	0.576916541	0.846	0.543	1	0.002098457	1.54504015	2.678099933	black
SYT4	0.000162667	0.602151449	0.912	0.629	1	0.002128732	1.608875834	2.671879036	black
MRPL47	0.00016293	1.036523598	0.22	0.05	1	0.002129204	2.769365879	2.67178276	red
NDUFA11	0.000163172	0.943551818	0.407	0.164	1	0.002129406	2.520926527	2.671741476	black
IFT22	0.000163516	0.970854596	0.176	0.029	1	0.002129406	2.593872493	2.671741476	black
LMAN2L	0.000163626	0.611203826	0.549	0.257	1	0.002129406	1.632978613	2.671741476	black
TRAPPC2L	0.000163881	1.019325819	0.352	0.129	1	0.002129771	2.723299257	2.671667103	red
PDIA6	0.000164609	0.760193588	0.429	0.179	1	0.002136271	2.029978092	2.670343614	black
LCMT2	0.000165072	1.152562394	0.121	0.007	1	0.002139323	3.077023182	2.669723737	red
SMG9	0.000165304	1.00730632	0.22	0.05	1	0.002139372	2.689219397	2.669713614	red
ANTXR1	0.000166816	1.116421538	0.121	0.007	1	0.00215005	2.978111852	2.667551414	red
MRPS30	0.000166816	1.084494499	0.121	0.007	1	0.00215005	2.892944834	2.667551414	red
GM15965	0.000166816	0.872112687	0.121	0.007	1	0.00215005	2.326405432	2.667551414	black
TMCC3	0.000167572	0.526220388	0.637	0.321	1	0.002156829	1.403000495	2.666184222	black
TIMM23	0.000168709	0.60421525	0.516	0.221	1	0.00216849	1.609534279	2.663842529	black
SNRPE	0.000169889	1.09821499	0.253	0.071	1	0.002180664	2.922801679	2.661411205	red
DCTN2	0.000170701	0.725349805	0.407	0.157	1	0.002188098	1.929382067	2.659933254	black
LAPTM4A	0.000171163	0.800151532	0.593	0.293	1	0.002191024	2.127885226	2.65935281	black
RPL6	0.000172495	0.578146383	0.758	0.407	1	0.002205071	1.535890615	2.656577397	black
RPS15	0.000173305	0.49054192	0.725	0.4	1	0.002212406	1.302455105	2.655135171	black
PEX19	0.000173638	0.631896761	0.341	0.114	1	0.002213647	1.677617399	2.654891596	black
RPS15A	0.000174428	0.838787868	0.462	0.2	1	0.002220706	2.225731143	2.653508982	black
RNF114	0.000174718	0.850770219	0.385	0.143	1	0.002221382	2.25741394	2.653376775	black
AAMP	0.000177653	0.768900876	0.341	0.114	1	0.002252815	2.035491611	2.647274407	black
GPATCH11	0.000177671	0.836685826	0.22	0.05	1	0.002252815	2.214936973	2.647274407	black
OSBPL9	0.000178495	0.516026067	0.945	0.721	1	0.002260213	1.365327941	2.645850719	black
X6530401F13RIK	0.000180576	0.991560637	0.187	0.036	1	0.002283485	2.619110042	2.641401791	black
RBM6	0.000182526	-0.566864993	0.912	0.857	1	0.002305036	1.495005666	2.637322261	black
STXBP1	0.000183076	0.512884559	0.89	0.6	1	0.002308878	1.352270915	2.636598999	black
GFPT1	0.000183687	0.678346059	0.451	0.2	1	0.002313464	1.787941916	2.635737161	black
MEF2C	0.000184878	1.210780565	0.154	0.021	1	0.002323182	3.18909523	2.633916765	red
NRXN3	0.000184953	-0.502554718	1	0.971	1	0.002323182	1.323687297	2.633916765	black
RPS18	0.000185902	0.808949833	0.505	0.221	1	0.002331977	2.129379015	2.632275735	black
SYF2	0.000186352	1.115597664	0.187	0.036	1	0.002334504	2.936036014	2.631805452	red
WDR45B	0.000187667	0.655295015	0.352	0.121	1	0.002347836	1.72298831	2.62933224	black
PDXP	0.000188161	1.027871007	0.286	0.086	1	0.002348769	2.7024371	2.629159769	red
X6330403K07RIK	0.000188242	0.617489476	0.703	0.436	1	0.002348769	1.623478487	2.629159769	black
HBEGF	0.000189305	0.997233448	0.187	0.036	1	0.002358896	2.620022618	2.627291155	black
MAP1LC3A	0.000189684	0.614914618	0.473	0.193	1	0.002360478	1.615380727	2.627000043	black
CLU	0.000190835	0.751845127	0.626	0.314	1	0.00237166	1.973554067	2.624947606	black
P2RY14	0.000191313	1.16254709	0.33	0.121	1	0.002374237	3.05107694	2.624476004	red
COIL	0.000191548	0.803969783	0.275	0.079	1	0.002374237	2.109999404	2.624476004	black
ADGRB3	0.000192511	-0.489816785	0.989	0.993	1	0.002382868	1.284740441	2.622899992	black
SPCS1	0.000192753	0.722378554	0.429	0.179	1	0.002382868	1.894726703	2.622899992	black
UBXN2A	0.000196047	0.883296744	0.363	0.136	1	0.002417629	2.31124332	2.616610258	black
RPS23	0.00019608	0.632837382	0.593	0.3	1	0.002417629	1.655888785	2.616610258	black
X2810004N23RIK	0.00019646	0.86586776	0.275	0.079	1	0.002419136	2.265404157	2.616339655	black
TEX261	0.000197223	0.755659951	0.264	0.071	1	0.002425347	1.976221624	2.615226098	black
STK32C	0.000197715	0.846983159	0.286	0.086	1	0.002428214	2.214617976	2.614713117	black
UQCRFS1	0.000199532	0.858774681	0.308	0.1	1	0.00244733	2.242524702	2.611307426	black
NISCH	0.000199962	0.477564559	0.802	0.471	1	0.002448794	1.246943874	2.611047761	black
CCT2	0.000200173	0.875255174	0.286	0.086	1	0.002448794	2.285333062	2.611047761	black
ROBO2	0.000200884	-0.603045123	0.89	0.893	1	0.002454292	1.573992248	2.610073755	black
ERP29	0.000201218	0.545112619	0.659	0.329	1	0.002455147	1.422701691	2.609922504	black
STX12	0.000201477	0.671542142	0.396	0.15	1	0.002455147	1.75267295	2.609922504	black
MRPS18C	0.000202541	0.960227968	0.231	0.057	1	0.002464903	2.504466803	2.608200225	black
GNAZ	0.000203019	0.621637935	0.407	0.164	1	0.002467525	1.621069153	2.607738461	black
GM29536	0.000203731	1.319828149	0.209	0.05	1	0.002472974	3.440502264	2.606780486	red
GM13830	0.000206246	1.113427715	0.264	0.079	1	0.002500264	2.897154688	2.602014166	red
HIGD1A	0.00020763	0.635828097	0.44	0.179	1	0.002511888	1.653152874	2.599999719	black
SLC23A2	0.00020774	0.656177411	0.67	0.364	1	0.002511888	1.706061084	2.599999719	black
CHRNA6	0.00020899	0.731161298	0.429	0.179	1	0.002521202	1.899843889	2.598392305	black
NR4A1	0.000209172	1.110737715	0.154	0.021	1	0.002521202	2.886132331	2.598392305	red
LINGO2	0.000209316	-0.739017202	0.978	0.986	1	0.002521202	1.92025661	2.598392305	black
RPS5	0.000211431	0.843624198	0.473	0.221	1	0.002543411	2.188853371	2.594583437	black
DNAJB11	0.000213063	0.680088281	0.341	0.114	1	0.002555702	1.763121921	2.592489786	black
B230307C23RIK	0.000213124	0.667967461	0.264	0.071	1	0.002555702	1.731698821	2.592489786	black
SCD2	0.000213486	0.574766684	0.681	0.371	1	0.002555702	1.490076757	2.592489786	black
RPS4X	0.000213543	0.517491668	0.582	0.257	1	0.002555702	1.341591863	2.592489786	black
SNRPN	0.000214249	0.56933616	0.879	0.614	1	0.002560886	1.475497184	2.591609823	black
NAP1L3	0.000215327	1.112364032	0.198	0.043	1	0.002570503	2.881002666	2.589981861	red
MAPT	0.000219216	0.372216061	0.989	0.857	1	0.0026136	0.961345063	2.582760831	black
MDH2	0.000219923	0.660784198	0.451	0.186	1	0.002618703	1.706087853	2.58191382	black
WIPF1	0.000221351	0.956417387	0.187	0.036	1	0.00263237	2.46722504	2.579653062	black
IPO7	0.000222	0.54881238	0.44	0.171	1	0.002636748	1.415349506	2.57893145	black
B4GALT4	0.000223346	0.631229026	0.22	0.05	1	0.002649377	1.626586462	2.576856251	black
SAYSD1	0.000224368	0.952585978	0.154	0.021	1	0.002654791	2.453832591	2.575969673	black
TTC33	0.000224368	1.129403094	0.154	0.021	1	0.002654791	2.909308119	2.575969673	red
NLE1	0.000225456	1.154854274	0.209	0.05	1	0.002664302	2.973075994	2.574416582	red
FSD1L	0.000225904	0.642617768	0.549	0.257	1	0.002666237	1.654163162	2.574101189	black
TMEM223	0.000226391	0.68441516	0.286	0.086	1	0.002668625	1.761487766	2.573712373	black
RPS2	0.000227341	0.682711903	0.714	0.4	1	0.002673279	1.756587439	2.572955636	black
DDOST	0.000227356	0.726728508	0.385	0.15	1	0.002673279	1.869840211	2.572955636	black
FKRP	0.000228612	1.031473096	0.198	0.043	1	0.002684691	2.652026421	2.571105762	red
SCG3	0.000228901	0.615146825	0.681	0.364	1	0.002684725	1.58160416	2.571100258	black
POLR3A	0.000230189	0.898252565	0.242	0.064	1	0.002694453	2.308086323	2.569529344	black
SF3B2	0.000230305	0.522306943	0.681	0.35	1	0.002694453	1.342083016	2.569529344	black
MPHOSPH10	0.000231917	0.805269786	0.187	0.036	1	0.002707617	2.067459985	2.567412834	black
TRAPPC4	0.000232007	0.770973437	0.286	0.086	1	0.002707617	1.979407098	2.567412834	black
GM45435	0.000233422	0.597640329	0.505	0.221	1	0.002720738	1.533134635	2.565313217	black
CNTN2	0.000239321	0.876762077	0.374	0.15	1	0.002786038	2.240138443	2.555012928	black
MTMR1	0.000240401	0.625689601	0.549	0.264	1	0.002795147	1.597758056	2.553595352	black
CSGALNACT1	0.000242663	1.108839706	0.198	0.043	1	0.002814708	2.828169615	2.550566688	red
TELO2	0.000242683	0.806176222	0.341	0.121	1	0.002814708	2.056206215	2.550566688	black
NKAIN2	0.000243957	-0.697185586	0.923	0.957	1	0.002825987	1.777007421	2.548829833	black
RAB42	0.000245984	1.271905195	0.132	0.014	1	0.002845957	3.237980239	2.545771691	red
CREB3L2	0.000246742	0.850418597	0.187	0.036	1	0.002851207	2.164290869	2.544971238	black
PHF6	0.000247217	0.801854166	0.451	0.193	1	0.002853182	2.040454636	2.544670494	black
RBM24	0.000250585	0.660063556	0.187	0.036	1	0.002888497	1.676117935	2.539328099	black
RPAP1	0.000250935	-1.614232105	0.231	0.407	1	0.002888982	4.098947174	2.539255143	blue
ZADH2	0.000251534	0.860112591	0.253	0.071	1	0.002889109	2.184028881	2.539236031	black
NAGK	0.000251562	0.614427827	0.582	0.286	1	0.002889109	1.560177277	2.539236031	black
RGS3	0.000252647	0.793762227	0.264	0.079	1	0.002897585	2.014539759	2.537963751	black
CLMN	0.000252917	0.880467227	0.33	0.114	1	0.002897585	2.234593905	2.537963751	black
SLC8A1	0.000256069	-0.525042643	1	0.979	1	0.002925381	1.33036227	2.533817564	black
COX7A2L	0.000256283	0.953911681	0.352	0.136	1	0.002925381	2.417038171	2.533817564	black
DMAC2	0.00025659	1.142311858	0.209	0.05	1	0.002925381	2.894409849	2.533817564	red
PDCD6	0.00025659	1.138518984	0.209	0.05	1	0.002925381	2.8847994	2.533817564	red
GM16835	0.000257406	0.63031234	0.33	0.107	1	0.002931123	1.59655974	2.532966022	black
UBE2V1	0.000259386	0.843629267	0.341	0.121	1	0.002947316	2.134865654	2.530573247	black
MGST3	0.000259457	0.946445492	0.242	0.064	1	0.002947316	2.395049641	2.530573247	black
X3830406C13RIK	0.000260001	0.690077353	0.374	0.136	1	0.002947988	1.746222982	2.530474266	black
A830092H15RIK	0.000260421	1.347014987	0.132	0.014	1	0.002947988	3.408586762	2.530474266	red
SGMS1	0.000260459	0.513944106	0.736	0.393	1	0.002947988	1.300522334	2.530474266	black
WDR60	0.000262644	0.509504939	0.451	0.179	1	0.002969143	1.287706947	2.527368918	black
NTMT1	0.000263509	0.821504605	0.352	0.129	1	0.002975338	2.075501574	2.526463714	black
R3HDM1	0.000264477	-0.60217187	0.846	0.857	1	0.002982678	1.520720969	2.525393569	black
TMEM222	0.000265188	0.799046489	0.341	0.121	1	0.002987109	2.017391729	2.524748881	black
TMED7	0.000268291	0.726963036	0.253	0.071	1	0.003018432	1.832105763	2.520218597	black
PIK3R1	0.0002687	0.644359133	0.385	0.143	1	0.003019414	1.623834847	2.520077336	black
UBQLN2	0.000269964	0.725813731	0.242	0.064	1	0.003029994	1.828004188	2.51855829	black
UQCR11	0.000274392	0.598050291	0.385	0.143	1	0.003076007	1.502309878	2.512012618	black
APLP2	0.000275083	0.816578265	0.813	0.529	1	0.003080073	2.050786471	2.511438961	black
GM19938	0.000276595	-1.245065925	0.352	0.507	1	0.003093315	3.124587456	2.509575914	blue
ENO1	0.00027889	0.657594671	0.505	0.221	1	0.003115269	1.648263973	2.506504456	black
MAN2A1	0.000280232	0.855743768	0.341	0.121	1	0.003126538	2.143583637	2.50493631	black
TMEM9B	0.000284205	0.70710863	0.396	0.15	1	0.003167099	1.767303755	2.499338404	black
NSUN5	0.00028626	1.155275673	0.132	0.014	1	0.003186215	2.884405509	2.496724873	red
TMEM60	0.000288777	0.951023024	0.286	0.093	1	0.003206618	2.371806446	2.493952707	black
TTC1	0.000288777	0.840831796	0.286	0.093	1	0.003206618	2.096994734	2.493952707	black
SMYD4	0.000289596	0.964373435	0.275	0.086	1	0.003207501	2.404986492	2.493833203	black
NAE1	0.000289784	0.672931978	0.538	0.264	1	0.003207501	1.67818011	2.493833203	black
NDUFB5	0.000289882	0.552578421	0.516	0.25	1	0.003207501	1.378038415	2.493833203	black
X4921534H16RIK	0.000295893	0.96783578	0.209	0.05	1	0.003270155	2.405489658	2.485431628	black
ANKRD61	0.000297253	1.115375959	0.132	0.014	1	0.003281328	2.770538546	2.483950388	red
ABRAXAS2	0.00029934	0.742195278	0.341	0.121	1	0.003300479	1.841700487	2.481423073	black
NEFM	0.000300119	0.942170361	0.209	0.05	1	0.003303983	2.337489056	2.480962204	black
YPEL3	0.000300362	0.752441952	0.582	0.314	1	0.003303983	1.866780044	2.480962204	black
MED4	0.000301148	0.534421966	0.231	0.057	1	0.003308749	1.325546124	2.480336153	black
ECH1	0.000301926	1.091038942	0.165	0.029	1	0.003312933	2.705544497	2.479787286	red
PFDN5	0.000302235	0.645614757	0.429	0.179	1	0.003312933	1.600987265	2.479787286	black
TMEM107	0.000302897	1.089498521	0.132	0.014	1	0.003316317	2.701241612	2.479343993	red
ATP6V1A	0.000303389	0.51530547	0.747	0.429	1	0.003317834	1.277517146	2.479145321	black
XIAP	0.000306655	0.461018969	0.582	0.271	1	0.003345852	1.141249355	2.475493272	black
ETNK1	0.00030699	-0.623336266	0.769	0.843	1	0.003345852	1.543064732	2.475493272	black
TET3	0.000307255	0.584255027	0.593	0.293	1	0.003345852	1.446319389	2.475493272	black
FAM161B	0.000307378	0.702102016	0.198	0.043	1	0.003345852	1.738048818	2.475493272	black
CRAT	0.000307941	0.69419285	0.242	0.064	1	0.00334603	1.718453691	2.47547017	black
FAR1	0.000308107	-1.071172179	0.495	0.6	1	0.00334603	2.651654774	2.47547017	blue
TOB2	0.000308741	0.95874243	0.209	0.05	1	0.003348155	2.373073998	2.475194509	black
FMC1	0.000309016	0.66927598	0.297	0.093	1	0.003348155	1.65658823	2.475194509	black
MTMR12	0.000312572	0.617789678	0.264	0.079	1	0.003382771	1.526389916	2.470727448	black
PEX14	0.000316941	0.629733468	0.451	0.2	1	0.003421962	1.552749453	2.465724837	black
BIN3	0.000317051	1.065885202	0.165	0.029	1	0.003421962	2.628179615	2.465724837	red
NDUFA2	0.000317296	0.611179628	0.473	0.207	1	0.003421962	1.507000788	2.465724837	black
ARFIP2	0.000317652	0.929815635	0.286	0.093	1	0.003421962	2.292669506	2.465724837	black
IFT52	0.000318512	0.861874887	0.396	0.164	1	0.003424533	2.124865184	2.465398652	black
P4HTM	0.000318621	0.516066531	0.637	0.314	1	0.003424533	1.27230973	2.465398652	black
UQCC2	0.000321163	0.915706131	0.352	0.136	1	0.003447905	2.254875752	2.462444748	black
MOCS1	0.000322248	1.05082941	0.165	0.029	1	0.003455467	2.586609495	2.461493244	red
AMY1	0.000322604	-1.00389294	0.626	0.721	1	0.003455467	2.471075689	2.461493244	blue
ZC3H15	0.000323277	0.610297381	0.615	0.293	1	0.003458728	1.501992861	2.461083577	black
NCDN	0.000323699	0.331073421	0.527	0.221	1	0.003459301	0.814775537	2.461011621	black
SYNE1	0.000324694	-0.465409398	0.967	0.957	1	0.003465992	1.144987402	2.460172497	black
RPL3	0.000325169	0.560209011	0.736	0.414	1	0.003467112	1.378132196	2.460032181	black
RNF2	0.000331322	0.76376558	0.209	0.05	1	0.003528713	1.873046194	2.452383616	black
PRDM15	0.000331865	0.733110055	0.319	0.107	1	0.00352927	1.797816862	2.452315106	black
CX3CL1	0.000332127	0.668528743	0.429	0.186	1	0.00352927	1.639443136	2.452315106	black
CYS1	0.000335568	0.869704203	0.198	0.043	1	0.003561801	2.129323148	2.448330296	black
SERAC1	0.000337049	0.903894966	0.286	0.093	1	0.003572715	2.2118324	2.44700157	black
TRAM1L1	0.000337358	0.683953122	0.308	0.1	1	0.003572715	1.673634363	2.44700157	black
CAMKK2	0.000338128	0.653929573	0.407	0.171	1	0.003576834	1.599839462	2.446501165	black
NKTR	0.000340453	-0.521019537	0.912	0.929	1	0.003597377	1.273379048	2.444014012	black
GJC3	0.000340878	1.666249778	0.11	0.007	1	0.003597812	4.072250271	2.443961478	red
FAIM2	0.000342215	0.505701574	0.824	0.514	1	0.003607869	1.235302144	2.442749259	black
TPST1	0.000344923	0.643332745	0.385	0.143	1	0.00363234	1.569611953	2.439813558	black
TOR1B	0.000345603	1.024973848	0.209	0.05	1	0.003635421	2.500367649	2.439445313	red
MORF4L2	0.000346102	0.540136667	0.538	0.243	1	0.003636595	1.317558137	2.439305122	black
SCAMP5	0.000347819	0.466792501	0.604	0.3	1	0.003650548	1.137872977	2.437641939	black
GM12709	0.000348336	-1.148006909	0.374	0.529	1	0.003651887	2.798246976	2.437482697	blue
CCL27A	0.00035071	-1.759551515	0.11	0.286	1	0.003672675	4.284538815	2.435017548	blue
FAM160A2	0.000355231	0.741366701	0.253	0.071	1	0.003706487	1.802290275	2.431037531	black
DNAJC9	0.000355414	1.077998762	0.11	0.007	1	0.003706487	2.62065545	2.431037531	red
MAGEH1	0.000355442	0.756857601	0.209	0.05	1	0.003706487	1.839949234	2.431037531	black
PARK7	0.000355519	0.724686142	0.429	0.186	1	0.003706487	1.76173921	2.431037531	black
PIGT	0.000356325	0.944625974	0.22	0.057	1	0.003707728	2.296283831	2.430892113	black
RINT1	0.000356429	0.694135375	0.341	0.121	1	0.003707728	1.687368209	2.430892113	black
EMC7	0.000359095	0.922753642	0.473	0.236	1	0.003728495	2.24087629	2.428466482	black
ST3GAL3	0.000360433	0.566964992	0.615	0.321	1	0.003728495	1.37685548	2.428466482	black
PANK2	0.000360455	0.632231796	0.44	0.186	1	0.003728495	1.535353726	2.428466482	black
MAT2B	0.000360459	0.855887503	0.209	0.05	1	0.003728495	2.078494114	2.428466482	black
LRRC59	0.000360459	0.984057009	0.209	0.05	1	0.003728495	2.389749462	2.428466482	black
ATP5MD	0.000360809	0.534846905	0.593	0.314	1	0.003728495	1.298857783	2.428466482	black
GALNT14	0.000362584	1.385698773	0.187	0.043	1	0.003739009	3.363428396	2.427243541	red
POU3F1	0.000362897	1.061659879	0.11	0.007	1	0.003739009	2.576907084	2.427243541	red
AFG3L1	0.000363022	0.586296963	0.56	0.271	1	0.003739009	1.423085518	2.427243541	black
ZFP770	0.000365643	1.105228777	0.176	0.036	1	0.003758714	2.680136393	2.424960741	red
SLITRK3	0.00036612	0.989891126	0.22	0.057	1	0.003758714	2.400447118	2.424960741	black
HMGB1	0.00036633	0.542821723	0.505	0.229	1	0.003758714	1.316321368	2.424960741	black
HUWE1	0.000366538	-0.74727616	0.78	0.757	1	0.003758714	1.812115351	2.424960741	black
GM47283	0.000367015	0.540920294	0.769	0.486	1	0.003759501	1.311661297	2.424869823	black
LGALS8	0.000370708	0.695856237	0.374	0.143	1	0.003793193	1.684664543	2.420995105	black
UQCRC2	0.000371615	0.723263822	0.462	0.207	1	0.003798324	1.750593505	2.420407952	black
VSTM5	0.000376586	0.747375499	0.363	0.136	1	0.003844948	1.80499368	2.415109516	black
EEF1G	0.000377838	0.709623361	0.604	0.293	1	0.003853536	1.713130592	2.414140635	black
BORCS5	0.000379211	0.743968396	0.286	0.093	1	0.003863345	1.79522291	2.413036521	black
HIP1	0.000380287	0.758090295	0.385	0.157	1	0.003868177	1.828888073	2.412493718	black
RCAN1	0.00038051	0.727816307	0.341	0.129	1	0.003868177	1.755852269	2.412493718	black
LSM3	0.000382906	1.00511367	0.176	0.036	1	0.003879922	2.423506994	2.411177029	red
BMPER	0.000382906	0.981455025	0.176	0.036	1	0.003879922	2.366461811	2.411177029	black
TMED3	0.000382906	1.277523602	0.176	0.036	1	0.003879922	3.080335563	2.411177029	red
ZFP961	0.000385609	0.634711678	0.264	0.079	1	0.003901075	1.52890343	2.408815659	black
RGMA	0.000385942	0.59627274	0.308	0.107	1	0.003901075	1.436311113	2.408815659	black
PLEKHB1	0.000386241	1.006827834	0.11	0.007	1	0.003901075	2.425262653	2.408815659	red
GM3448	0.000388828	1.054566927	0.176	0.036	1	0.003918765	2.538185285	2.406850831	red
AC166172.1	0.000388828	1.012958224	0.176	0.036	1	0.003918765	2.438039342	2.406850831	red
FCHO1	0.000390354	0.724191361	0.374	0.143	1	0.003929928	1.742125866	2.405615366	black
MANBAL	0.000392791	0.772009884	0.286	0.093	1	0.003950225	1.855431716	2.403378188	black
TRAIP	0.00039432	1.164357644	0.11	0.007	1	0.003957209	2.797498558	2.402611063	red
HEPACAM	0.000394329	1.026450983	0.11	0.007	1	0.003957209	2.466162488	2.402611063	red
SPARC	0.000396129	1.03721164	0.187	0.043	1	0.003971019	2.490446776	2.401097982	red
ZCCHC9	0.000401918	0.887284353	0.385	0.164	1	0.004024643	2.12528796	2.395272669	black
TMEM147	0.000402604	0.670286648	0.505	0.236	1	0.004024643	1.605519289	2.395272669	black
GABRB1	0.000402765	-0.574910779	0.989	0.964	1	0.004024643	1.377068077	2.395272669	black
EEF1E1	0.000407872	0.642728655	0.22	0.057	1	0.004071346	1.536289889	2.390262012	black
RAB5IF	0.00040843	1.020408673	0.242	0.071	1	0.004072577	2.438910051	2.390130657	red
NAXD	0.000409953	0.599856946	0.264	0.079	1	0.004083429	1.433043273	2.388975044	black
VCP	0.000414087	0.510270234	0.725	0.379	1	0.004120234	1.217034366	2.385078109	black
FAM133B	0.000419267	0.703389039	0.505	0.236	1	0.004163841	1.674421694	2.380505811	black
GM46218	0.000419741	0.907470343	0.176	0.036	1	0.004163841	2.160238426	2.380505811	black
CD63	0.000419801	1.067211043	0.308	0.114	1	0.004163841	2.54050209	2.380505811	red
FAM210B	0.000421055	0.657572746	0.429	0.179	1	0.004171865	1.564805946	2.379669712	black
SNX21	0.000421776	0.828622982	0.484	0.236	1	0.004174601	1.971613147	2.379385064	black
CERS6	0.00042497	0.591503622	0.549	0.271	1	0.004201782	1.405747671	2.376566463	black
MIIP	0.000426057	0.662052714	0.209	0.05	1	0.004208094	1.572980684	2.375914562	black
AGPAT4	0.000429632	0.615461316	0.747	0.464	1	0.004238942	1.460331211	2.372742483	black
TAF13	0.000430378	0.753102446	0.22	0.057	1	0.004241847	1.786694133	2.372445	black
KMT2D	0.000432263	-1.529484072	0.143	0.329	1	0.004255955	3.626411323	2.371003	blue
PIP4K2A	0.000432765	0.832377253	0.319	0.114	1	0.004256432	1.973528456	2.370954334	black
IGSF3	0.000434411	0.545607051	0.396	0.164	1	0.004266748	1.293035795	2.369903017	black
TBRG1	0.000434724	1.072682172	0.143	0.021	1	0.004266748	2.542152716	2.369903017	red
MTCH1	0.000436943	0.623816045	0.747	0.436	1	0.004284054	1.477286902	2.368145087	black
CEP290	0.000437514	0.607850968	0.615	0.321	1	0.004285176	1.439410146	2.368031345	black
NDUFS6	0.000440047	0.753170328	0.33	0.114	1	0.00430524	1.782002981	2.366002636	black
MMP16	0.000440481	-0.636512177	0.912	0.9	1	0.00430524	1.505989487	2.366002636	black
ATP5O	0.000447103	0.926249101	0.429	0.193	1	0.004362121	2.186227898	2.360302314	black
CKB	0.000447535	0.498424394	0.813	0.407	1	0.004362121	1.176432251	2.360302314	black
LETM2	0.000447695	0.601334983	0.538	0.271	1	0.004362121	1.419332353	2.360302314	black
MPRIP	0.000449717	0.596513623	0.725	0.4	1	0.004364726	1.407797829	2.360043048	black
LANCL1	0.000449803	0.521277453	0.659	0.357	1	0.004364726	1.230237229	2.360043048	black
GM48003	0.000449966	1.100106503	0.143	0.021	1	0.004364726	2.596298705	2.360043048	red
MCCC1	0.000450288	0.638615592	0.462	0.214	1	0.004364726	1.507160289	2.360043048	black
KRTCAP2	0.000450288	0.621981283	0.484	0.2	1	0.004364726	1.467902604	2.360043048	black
AHSA1	0.000452352	0.899897682	0.374	0.15	1	0.004380201	2.122414029	2.358505942	black
ZFP64	0.000453435	0.712554379	0.495	0.229	1	0.00438617	1.680142352	2.357914569	black
GAB2	0.000456568	-0.762571178	0.824	0.8	1	0.004411017	1.796206872	2.355461265	black
SEL1L	0.000457595	0.658067015	0.582	0.307	1	0.004411017	1.550051364	2.355461265	black
PARD6G	0.000457774	1.098996107	0.143	0.021	1	0.004411017	2.588642761	2.355461265	red
HSPA4	0.000457885	0.474845356	0.659	0.343	1	0.004411017	1.118479844	2.355461265	black
TXN2	0.000461888	0.784563769	0.297	0.1	1	0.004445022	1.845392916	2.352126098	black
TMBIM4	0.000463434	0.794000993	0.407	0.171	1	0.004455332	1.86679153	2.351119892	black
TMEM130	0.000468484	0.432728097	0.89	0.55	1	0.004489119	1.015975858	2.347838895	black
MAP7	0.000469046	0.45766424	0.637	0.343	1	0.004489119	1.074521904	2.347838895	black
SLC22A17	0.000469208	0.472701577	0.89	0.671	1	0.004489119	1.109827148	2.347838895	black
HMGXB3	0.000469255	0.693796438	0.352	0.129	1	0.004489119	1.628922261	2.347838895	black
GM1992	0.000469341	0.877164909	0.242	0.071	1	0.004489119	2.059441891	2.347838895	black
D430042O09RIK	0.000471635	0.654791689	0.418	0.171	1	0.004506466	1.536248621	2.346163896	black
IFFO1	0.00047423	0.598848557	0.374	0.143	1	0.00452224	1.404088087	2.344646353	black
IFT140	0.00047425	0.752387016	0.352	0.136	1	0.00452224	1.764081473	2.344646353	black
MFAP1A	0.000477588	0.541202135	0.319	0.114	1	0.004549447	1.267517791	2.342041373	black
EBP	0.000481241	0.715279594	0.176	0.036	1	0.004579603	1.673162117	2.339172166	black
PTP4A2	0.000484084	0.694040607	0.538	0.271	1	0.004601989	1.622010698	2.337054463	black
GM49359	0.000486647	0.667617214	0.341	0.121	1	0.004621665	1.559020738	2.335201528	black
ANK	0.000489453	0.655910818	0.681	0.393	1	0.004643615	1.530334274	2.333143823	black
KAT14	0.000491817	0.816686131	0.22	0.057	1	0.004661328	1.904095814	2.331490325	black
SEZ6L2	0.000493917	0.708180162	0.604	0.321	1	0.004676515	1.650114794	2.330077685	black
MN1	0.000498741	0.893815966	0.143	0.021	1	0.004717097	2.079306561	2.326325151	black
NAPG	0.000499318	0.713777259	0.516	0.264	1	0.004717097	1.66047799	2.326325151	black
GTF2IRD1	0.000499712	0.558341274	0.626	0.336	1	0.004717097	1.298883348	2.326325151	black
PIGZ	0.000500292	1.033303361	0.187	0.043	1	0.00471783	2.403729954	2.326257752	red
PRDX4	0.000503543	0.737420917	0.176	0.036	1	0.00474372	1.713678456	2.323880997	black
GM10069	0.00050428	1.172464103	0.275	0.093	1	0.004745896	2.724433514	2.323681814	red
NXT1	0.000507334	0.926439871	0.143	0.021	1	0.004769858	2.150725152	2.321494595	black
PNPLA3	0.000511189	0.667281136	0.176	0.036	1	0.004796482	1.547476443	2.319077161	black
SFT2D3	0.000511189	0.862920104	0.176	0.036	1	0.004796482	2.001178304	2.319077161	black
YWHAG	0.000512356	0.415892918	0.703	0.393	1	0.004802637	0.964256131	2.318520199	black
RER1	0.00051992	0.673068883	0.363	0.143	1	0.004868672	1.556532045	2.312589521	black
DMD	0.000520983	-0.485464159	0.978	0.993	1	0.004873764	1.122458925	2.31213552	black
TNFRSF19	0.00052548	1.043774664	0.198	0.05	1	0.004910933	2.4099045	2.30883598	red
ZFP397	0.000526397	0.885112488	0.341	0.136	1	0.004914611	2.043291792	2.308510861	black
CSTF2	0.00053149	-1.17703303	0.363	0.507	1	0.004957227	2.71278007	2.304761209	blue
TMEM19	0.000532228	0.903181118	0.286	0.1	1	0.004959179	2.081462354	2.3045902	black
HLF	0.000537754	0.708497667	0.187	0.043	1	0.005005702	1.629923657	2.300534968	black
SLC22A15	0.000544105	0.835752096	0.319	0.114	1	0.005059798	1.918775489	2.295866798	black
IPMK	0.000545191	0.715430515	0.308	0.107	1	0.005064878	1.642221394	2.295431015	black
AARS	0.000548737	0.558162075	0.352	0.129	1	0.005092781	1.279890751	2.29304499	black
ZGPAT	0.000549615	0.718870037	0.286	0.093	1	0.005095891	1.648210757	2.29277988	black
FAM13C	0.000550886	0.484078075	0.473	0.207	1	0.005102631	1.1096066	2.292205858	black
DLK1	0.000558381	0.79829395	0.78	0.621	1	0.005166948	1.82551141	2.286765935	black
NARS	0.000559059	0.697626995	0.473	0.221	1	0.005168132	1.59524021	2.286666401	black
ANKRD11	0.000561539	0.44471182	0.879	0.579	1	0.005185942	1.016243151	2.285172342	black
ZMAT5	0.000564977	0.901980192	0.253	0.079	1	0.005212566	2.059174232	2.282948396	black
GRM5	0.000572401	-0.757298859	0.791	0.821	1	0.005275872	1.724903973	2.27770576	black
HSBP1	0.00057851	0.626912232	0.429	0.186	1	0.005324492	1.425424006	2.273721797	black
PAK1IP1	0.000578811	0.75857423	0.253	0.079	1	0.005324492	1.724786762	2.273721797	black
PDCD11	0.000583089	0.690390679	0.396	0.164	1	0.005354245	1.568085554	2.271301745	black
LNPK	0.000583186	0.447680789	0.747	0.429	1	0.005354245	1.016818158	2.271301745	black
ACAP2	0.000585263	0.603737214	0.615	0.314	1	0.005365467	1.370720414	2.270392452	black
GSTM5	0.000585552	0.929997094	0.297	0.114	1	0.005365467	2.111458382	2.270392452	black
MMUT	0.000587049	1.139873068	0.198	0.05	1	0.005371116	2.587438322	2.269935482	red
TCTN2	0.000587314	0.57632762	0.231	0.064	1	0.005371116	1.308226514	2.269935482	black
BC004004	0.000588291	0.587590359	0.418	0.171	1	0.005374818	1.333616391	2.269636272	black
DIXDC1	0.000589849	0.655079694	0.385	0.157	1	0.005383804	1.486317386	2.268910791	black
STXBP4	0.00059203	0.497724524	0.505	0.229	1	0.005396024	1.128802447	2.267926117	black
ACTR2	0.000592915	0.477105663	0.593	0.286	1	0.005396024	1.082040394	2.267926117	black
SRP68	0.000592955	0.856576456	0.253	0.079	1	0.005396024	1.942652115	2.267926117	black
CCT8	0.000593488	0.52217687	0.385	0.15	1	0.005396024	1.18425856	2.267926117	black
X0610030E20RIK	0.000602317	0.826679744	0.242	0.071	1	0.005471	1.869894397	2.261933246	black
KLHL23	0.000603457	0.920421962	0.198	0.05	1	0.005476054	2.081563986	2.26153229	black
CLCN4	0.000605445	0.651609006	0.418	0.179	1	0.005488785	1.472977679	2.26052382	black
ASPA	0.000607752	1.29041881	0.121	0.014	1	0.005504383	2.915432109	2.259291391	red
BRI3BP	0.000609809	0.744161311	0.242	0.071	1	0.005512368	1.680808711	2.258661779	black
RNF6	0.000609809	0.863607738	0.242	0.071	1	0.005512368	1.950597789	2.258661779	black
ATXN7L3B	0.000611617	0.608176186	0.473	0.221	1	0.005520177	1.373290405	2.258046989	black
TFAM	0.00061185	0.82786625	0.187	0.043	1	0.005520177	1.869360894	2.258046989	black
UBXN11	0.000614787	0.635264394	0.253	0.079	1	0.005541351	1.433400616	2.256384318	black
NECAB1	0.00061591	0.674594309	0.604	0.336	1	0.005546149	1.521890496	2.2560085	black
NDUFS2	0.000617732	0.631916753	0.352	0.143	1	0.005557223	1.425062131	2.255142192	black
BAHCC1	0.000620954	0.891511647	0.275	0.093	1	0.005580855	2.008842526	2.25329925	black
TEX2	0.000624928	0.384452795	0.451	0.2	1	0.005611192	0.865382045	2.250944863	black
A930005H10RIK	0.000625634	0.599110699	0.297	0.1	1	0.005612168	1.348519903	2.250869339	black
QPCT	0.000626747	1.264473858	0.231	0.071	1	0.005616779	2.845714418	2.250512654	red
ZFP637	0.000629557	0.623187322	0.187	0.043	1	0.005636576	1.401538706	2.248984626	black
EIF1B	0.000633313	1.021229749	0.352	0.15	1	0.005664799	2.2945148	2.246815472	red
TAF1	0.000637929	0.392751463	0.615	0.314	1	0.005700652	0.881363926	2.244075474	black
GGH	0.000640248	0.994606694	0.154	0.029	1	0.005715935	2.23081603	2.242912745	black
BTF3	0.000640876	0.844663619	0.319	0.121	1	0.005716101	1.89449614	2.242900129	black
SPOCK1	0.000642025	0.288479389	0.582	0.307	1	0.005720915	0.646924977	2.242534481	black
PODXL2	0.000644564	0.490483527	0.703	0.393	1	0.005738087	1.099287805	2.241232873	black
X3300002I08RIK	0.000646365	1.000582699	0.198	0.05	1	0.005748665	2.241738529	2.24043303	red
PLXNC1	0.000647238	0.517637902	0.429	0.186	1	0.005750031	1.159679616	2.240329797	black
RAB5B	0.000647744	0.639415212	0.56	0.286	1	0.005750031	1.432500951	2.240329797	black
PFN2	0.000649365	0.618812228	0.407	0.171	1	0.005758251	1.38595956	2.239709393	black
TUSC2	0.000650511	1.058632493	0.154	0.029	1	0.005758251	2.371029139	2.239709393	red
ANKRD9	0.000650511	0.961280919	0.154	0.029	1	0.005758251	2.152989903	2.239709393	black
MANF	0.000651536	0.590477075	0.484	0.221	1	0.005761883	1.322335367	2.239435574	black
EIF4G3	0.000654031	0.494873109	0.912	0.593	1	0.005776059	1.107708305	2.238368352	black
CNIH1	0.00065437	0.804785864	0.297	0.107	1	0.005776059	1.801407209	2.238368352	black
ANKRD17	0.000660704	-0.600695006	0.835	0.829	1	0.005826492	1.342308745	2.234592817	black
ERGIC1	0.000667677	0.598377588	0.527	0.264	1	0.005882454	1.334646167	2.230441436	black
ZMAT2	0.000668887	0.787832582	0.297	0.107	1	0.005887586	1.756916056	2.230062702	black
SPIN1	0.000669866	0.504326428	0.385	0.157	1	0.00589068	1.124564517	2.229834594	black
GM20275	0.000671341	0.631706216	0.341	0.129	1	0.005893981	1.408446664	2.22959127	black
ST3GAL6	0.000671498	1.136598376	0.154	0.029	1	0.005893981	2.534149816	2.22959127	red
YWHAQ	0.000676171	0.577984251	0.593	0.293	1	0.005929453	1.287162458	2.226985347	black
ZFP1	0.000677304	0.439834678	0.396	0.164	1	0.005933838	0.979364187	2.226664328	black
X2210016F16RIK	0.000679151	1.094553665	0.121	0.014	1	0.005944468	2.436352747	2.225886975	red
BMP2K	0.000682226	0.885469796	0.154	0.029	1	0.005964546	1.969659026	2.224422602	black
KLHL8	0.000682716	0.766833224	0.198	0.05	1	0.005964546	1.705761156	2.224422602	black
SNRNP27	0.000688361	0.598557041	0.374	0.15	1	0.006008274	1.329544996	2.221250282	black
TIAL1	0.000690255	-1.148956328	0.44	0.557	1	0.006019204	2.55121262	2.220460915	blue
CDK11B	0.00069114	0.798360732	0.429	0.193	1	0.006021328	1.772606467	2.220307684	black
SLC39A13	0.000693064	0.761707907	0.253	0.079	1	0.006032481	1.690613748	2.219504002	black
TRIM26	0.000697104	0.838794503	0.385	0.171	1	0.006062028	1.859927858	2.217382031	black
CAPZA1	0.000699131	0.83973871	0.462	0.229	1	0.006073173	1.861351709	2.216584383	black
SCAF11	0.000700328	0.47560716	0.505	0.236	1	0.006073173	1.054223404	2.216584383	black
HSPA12A	0.00070075	0.456774265	0.33	0.121	1	0.006073173	1.012478702	2.216584383	black
KCND2	0.000700975	-0.676545643	0.967	0.964	1	0.006073173	1.499620506	2.216584383	black
X1810037I17RIK	0.000702641	0.72590544	0.33	0.129	1	0.006081992	1.608573185	2.215954166	black
NPC2	0.000708778	0.876532958	0.308	0.114	1	0.006129457	1.939397549	2.212578011	black
BCL11B	0.000710742	1.205167958	0.165	0.036	1	0.006137913	2.665806543	2.211979273	red
ARPC3	0.000711216	0.829670419	0.198	0.05	1	0.006137913	1.835213771	2.211979273	black
MRPS16	0.000711718	1.103467539	0.22	0.064	1	0.006137913	2.440847325	2.211979273	red
PLA2G7	0.000715373	0.98941774	0.154	0.029	1	0.006163769	2.186765225	2.210153646	black
SIAE	0.000717704	0.772465462	0.121	0.014	1	0.006178181	1.706483847	2.209139348	black
PCDH8	0.000720848	0.989897173	0.22	0.064	1	0.00619956	2.185335719	2.207639116	black
GM43847	0.0007248	0.690798225	0.33	0.129	1	0.006222702	1.523915401	2.206021015	black
PICK1	0.000724866	0.586130712	0.363	0.143	1	0.006222702	1.293016669	2.206021015	black
UBE2E1	0.000729522	0.66030772	0.44	0.207	1	0.006256952	1.455078639	2.203637174	black
IL33	0.000731001	1.155516748	0.121	0.014	1	0.006263908	2.54578209	2.203154644	red
SRRM2	0.000733903	-0.515570606	0.978	0.9	1	0.006283043	1.135198823	2.201829993	black
GRIN2B	0.000734706	0.420619298	0.978	0.864	1	0.006284179	0.926099153	2.201751461	black
PRSS12	0.000743963	1.317182909	0.176	0.043	1	0.006357561	2.89346817	2.19670947	red
RAP1GAP	0.000750424	0.514476926	0.703	0.379	1	0.006406937	1.128427725	2.193349531	black
VPS37A	0.000752797	0.664313864	0.451	0.214	1	0.006421358	1.456423838	2.192373089	black
NCAPH2	0.000756154	0.641262283	0.396	0.164	1	0.006444138	1.404899943	2.190835141	black
ZFP958	0.000758283	0.898950947	0.121	0.014	1	0.006456414	1.968710344	2.190008643	black
WDR89	0.000768155	0.886676491	0.22	0.064	1	0.006534542	1.937197371	2.184784857	black
AURKAIP1	0.00077061	0.702943569	0.286	0.1	1	0.00654949	1.535082913	2.183792527	black
VPS9D1	0.000781972	0.56872117	0.374	0.15	1	0.006635898	1.238731767	2.178100328	black
PUF60	0.000782191	0.539570357	0.385	0.157	1	0.006635898	1.175238372	2.178100328	black
VDAC2	0.000784321	0.637544315	0.451	0.207	1	0.006647952	1.388132969	2.177312128	black
QRSL1	0.000788042	0.812461195	0.209	0.057	1	0.006663526	1.768155955	2.176295886	black
TIMM9	0.000788093	0.542149343	0.725	0.421	1	0.006663526	1.179877385	2.176295886	black
GM42418	0.000788289	0.549198369	0.648	0.393	1	0.006663526	1.195218151	2.176295886	black
HSP90B1	0.000793372	0.577442895	0.736	0.421	1	0.006695104	1.255500974	2.174242657	black
AKIRIN1	0.000793452	0.645849925	0.341	0.136	1	0.006695104	1.404234458	2.174242657	black
TSPOAP1	0.000801103	-1.488885875	0.275	0.429	1	0.006753592	3.231574907	2.170465153	blue
UVRAG	0.000803083	0.512323556	0.571	0.293	1	0.006761883	1.111707467	2.169932366	black
RPS19	0.000803528	0.405577213	0.736	0.386	1	0.006761883	0.880075122	2.169932366	black
TIAM1	0.000811056	0.505359542	0.505	0.243	1	0.006817774	1.094789385	2.166357405	black
NRAS	0.000811622	0.858662532	0.275	0.1	1	0.006817774	1.860169934	2.166357405	black
ADIPOR2	0.00081303	0.691283941	0.385	0.164	1	0.00682349	1.497316466	2.165993416	black
FOXK1	0.000815775	0.658893944	0.275	0.093	1	0.006840406	1.42645145	2.164918137	black
X2810013P06RIK	0.000819222	0.938559777	0.297	0.114	1	0.006863177	2.030550438	2.163474812	black
FH1	0.000822992	0.911733041	0.231	0.071	1	0.00688861	1.971046842	2.16186839	black
SMG5	0.000823922	0.399366867	0.582	0.279	1	0.006890249	0.863337346	2.161765074	black
CAMK2A	0.000828367	0.724612893	0.484	0.243	1	0.006921257	1.565029808	2.159815017	black
SMYD5	0.000832292	0.518296062	0.341	0.129	1	0.006947861	1.118560055	2.158148857	black
TMEM132E	0.000834195	1.189460664	0.176	0.043	1	0.006954088	2.566570442	2.157759831	red
TCP1	0.00083452	0.606335177	0.341	0.136	1	0.006954088	1.308325688	2.157759831	black
ZFP983	0.000837784	0.657361567	0.451	0.214	1	0.00697509	1.417567468	2.156450177	black
EFL1	0.00084173	0.670041774	0.286	0.1	1	0.007001259	1.443822004	2.154823864	black
MPPED2	0.000842419	0.53024702	0.846	0.679	1	0.007001259	1.142588932	2.154823864	black
EEFSEC	0.000843915	0.821463702	0.407	0.186	1	0.007007482	1.769792627	2.154438015	black
X9530068E07RIK	0.00084566	0.796792165	0.33	0.129	1	0.007015766	1.716230481	2.153924896	black
ATP2B3	0.000851041	0.576252127	0.56	0.271	1	0.007044326	1.240187093	2.152160547	black
CCDC12	0.000851741	0.38892527	0.385	0.15	1	0.007044326	0.837029621	2.152160547	black
ST18	0.000852157	1.945960621	0.132	0.021	1	0.007044326	4.188019673	2.152160547	red
LZTR1	0.000852643	0.527881327	0.495	0.229	1	0.007044326	1.136085366	2.152160547	black
A230087F16RIK	0.000852857	-1.681918871	0.022	0.157	1	0.007044326	3.619759436	2.152160547	blue
ZFP941	0.000857394	0.673834592	0.495	0.236	1	0.007075576	1.448904862	2.150238174	black
TMEM205	0.000860099	0.523013786	0.341	0.136	1	0.007091659	1.124088499	2.149252139	black
TTC28	0.000861383	0.50781253	0.725	0.45	1	0.007096012	1.091281841	2.148985654	black
GRIA4	0.000863157	-0.633979281	1	0.979	1	0.007098341	1.362322017	2.148843122	black
MT2	0.000863179	0.862187653	0.165	0.036	1	0.007098341	1.852706007	2.148843122	black
ATG3	0.000869086	0.804127602	0.385	0.164	1	0.007140661	1.725868157	2.146261554	black
KCNJ9	0.000870574	1.03959573	0.176	0.043	1	0.007140682	2.231243035	2.146260292	red
PSMD4	0.000871247	0.529638563	0.516	0.264	1	0.007140682	1.136742218	2.146260292	black
COX7B	0.000871372	0.520628705	0.692	0.429	1	0.007140682	1.117404717	2.146260292	black
X4932438A13RIK	0.000876607	-0.741930633	0.593	0.714	1	0.007172546	1.590941646	2.144326674	black
UQCRB	0.000877014	0.654952327	0.418	0.186	1	0.007172546	1.404431746	2.144326674	black
VSTM2L	0.000877553	0.630663436	0.341	0.136	1	0.007172546	1.352348427	2.144326674	black
PABPC4	0.000879379	-0.895158451	0.484	0.586	1	0.007181213	1.919042637	2.143802177	black
JPT1	0.000882064	0.794259103	0.396	0.179	1	0.00719667	1.701992727	2.142868393	black
MGAT2	0.000882806	0.751954898	0.198	0.05	1	0.00719667	1.611340383	2.142868393	black
PIP4P1	0.000884727	0.506383276	0.429	0.193	1	0.007206072	1.084825614	2.142301424	black
TRAPPC13	0.000889302	0.38186405	0.33	0.121	1	0.007237056	0.817356357	2.140438088	black
SH3GL1	0.000897971	0.703685812	0.33	0.136	1	0.007301266	1.503496388	2.136601822	black
PSMA5	0.000906228	0.750730239	0.396	0.186	1	0.007362024	1.601309675	2.133002765	black
NRP1	0.000909553	1.646662084	0.242	0.086	1	0.007382639	3.510335038	2.131788345	red
PFKL	0.000911398	0.974214104	0.297	0.114	1	0.007391229	2.076326302	2.131283352	black
BET1L	0.000918616	0.878680947	0.231	0.071	1	0.007443324	1.87003784	2.128233059	black
PIAS4	0.000919965	0.734103799	0.385	0.164	1	0.007444959	1.562273951	2.128137674	black
SNX6	0.000920404	0.41030894	0.549	0.279	1	0.007444959	0.873193914	2.128137674	black
B230219D22RIK	0.000926505	0.549547753	0.418	0.186	1	0.007487853	1.168142173	2.125642706	black
NUDT16	0.00092949	0.853887147	0.165	0.036	1	0.007505515	1.814185294	2.124619514	black
HARS	0.000943702	0.789200262	0.319	0.121	1	0.00761372	1.67184427	2.118403087	black
GM26944	0.000946949	-1.61744511	0.044	0.193	1	0.007633353	3.424591673	2.117284631	blue
CSPG5	0.000949413	0.604609715	0.659	0.421	1	0.007646647	1.279673966	2.116528951	black
JAGN1	0.000951418	0.760545099	0.22	0.064	1	0.007656219	1.609302534	2.115985674	black
ST3GAL1	0.000959123	0.95951734	0.132	0.021	1	0.007711615	2.02732069	2.112854667	black
CACNB2	0.000960514	-0.506950689	0.956	0.929	1	0.007716186	1.07098265	2.112597286	black
BCL2L1	0.000961866	0.49614655	0.44	0.193	1	0.007720439	1.048039134	2.112358002	black
IL6ST	0.000963368	0.548980759	0.22	0.064	1	0.007725882	1.159475872	2.112051932	black
FAM234B	0.000970421	0.693416156	0.286	0.1	1	0.007775802	1.462591351	2.109254793	black
NUP43	0.000974901	1.00966646	0.176	0.043	1	0.00779989	2.128287545	2.107911502	red
NDUFB11	0.00097509	0.758914423	0.33	0.129	1	0.00779989	1.599724441	2.107911502	black
RBM48	0.000985905	0.698971531	0.165	0.036	1	0.00787968	1.470280605	2.103491401	black
UGDH	0.000988791	0.701145919	0.505	0.25	1	0.007896018	1.474223703	2.102591862	black
NDRG3	0.000993692	0.390800835	0.692	0.371	1	0.007928409	0.820999857	2.100813978	black
PITPNA	0.000998162	0.365389667	0.758	0.479	1	0.007957311	0.767038284	2.099233649	black
GTF3C1	0.001001477	0.512383499	0.385	0.164	1	0.007976958	1.07506395	2.098162708	black
ADCYAP1	0.001002734	1.089434638	0.176	0.043	1	0.007980194	2.285619206	2.097986538	red
RNF103	0.0010058	0.564447856	0.451	0.207	1	0.007997818	1.183663219	2.09702846	black
CDK5RAP3	0.001007797	0.763251161	0.209	0.057	1	0.008006908	1.600182879	2.096535139	black
API5	0.001014411	0.669480745	0.253	0.086	1	0.008052637	1.401934114	2.094061891	black
PHF3	0.001022093	0.353945164	0.736	0.457	1	0.008106758	0.740153414	2.091152784	black
SCAPER	0.001026402	-0.571249434	0.846	0.821	1	0.008132304	1.19378928	2.089786369	black
ASTN2	0.001027047	-0.765525221	0.703	0.764	1	0.008132304	1.599784172	2.089786369	black
EPHB2	0.001032811	0.382045346	0.484	0.229	1	0.008171048	0.797604567	2.087722242	black
EPHB1	0.001037051	0.78967304	0.385	0.171	1	0.008194682	1.647627462	2.086467916	black
ANKFN1	0.001037545	0.555788058	0.352	0.15	1	0.008194682	1.159633951	2.086467916	black
MIA2	0.001038644	0.439722632	0.505	0.236	1	0.008196461	0.9174257	2.086373618	black
DCLK1	0.001043472	-0.419914607	0.956	0.943	1	0.008227643	0.87540629	2.08472455	black
S100B	0.001045475	0.685330377	0.165	0.036	1	0.008236521	1.428404093	2.084256209	black
FUT8	0.001047975	-0.763789477	0.747	0.771	1	0.008249288	1.591419168	2.08358352	black
MYCBP	0.001050506	0.365696007	0.264	0.086	1	0.008262281	0.761708232	2.082900053	black
SSB	0.001060444	0.518205049	0.67	0.386	1	0.008327474	1.077600528	2.07948674	black
TCEAL6	0.00106057	0.974356755	0.132	0.021	1	0.008327474	2.026161952	2.07948674	black
FAM220A.1	0.001065776	0.82125334	0.264	0.093	1	0.008361353	1.706337296	2.077723418	black
ZFP266	0.001068537	0.629300043	0.538	0.271	1	0.008376012	1.307032711	2.076962693	black
SMIM12	0.001077351	0.713973136	0.22	0.064	1	0.008433792	1.480763958	2.073977132	black
PPFIA2	0.001077706	-0.477964091	0.956	0.95	1	0.008433792	0.991286594	2.073977132	black
BICRA	0.001096573	0.671579596	0.385	0.171	1	0.008574286	1.388022059	2.066802012	black
SLC1A2	0.001102757	0.63214018	0.637	0.4	1	0.008608886	1.305402991	2.065053025	black
FYCO1	0.001103572	0.635151702	0.549	0.314	1	0.008608886	1.311621943	2.065053025	black
FBXO8	0.00110375	-1.172056754	0.363	0.493	1	0.008608886	2.420359344	2.065053025	blue
HIPK1	0.001104884	0.371018512	0.363	0.143	1	0.008610572	0.766141344	2.064967973	black
ZFP809	0.001106043	0.931769533	0.176	0.043	1	0.008612447	1.923986145	2.064873423	black
MCFD2	0.001114446	0.763750513	0.231	0.071	1	0.008670688	1.574812647	2.061946435	black
FAM20B	0.001116269	0.555580389	0.484	0.236	1	0.008677673	1.145382719	2.061596741	black
KCTD13	0.00112116	0.659714315	0.297	0.107	1	0.008708484	1.359049387	2.060057447	black
SH3BGRL3	0.001132468	0.784464595	0.286	0.107	1	0.008776898	1.613376123	2.05665894	black
RDX	0.001132966	0.573560399	0.495	0.25	1	0.008776898	1.179618123	2.05665894	black
CEP128	0.001133622	0.974391355	0.132	0.021	1	0.008776898	2.003990691	2.05665894	black
ARHGEF18	0.00113371	0.736087172	0.242	0.079	1	0.008776898	1.513880262	2.05665894	black
ZFP512B	0.001136744	-1.671271065	0.066	0.214	1	0.008790329	3.436124747	2.055994876	blue
MIR9.3HG	0.001137318	0.819044702	0.176	0.043	1	0.008790329	1.68395171	2.055994876	black
EIF3D	0.001139418	0.70182715	0.264	0.093	1	0.008799311	1.442641749	2.055551354	black
TPGS2	0.001141629	0.562780794	0.275	0.1	1	0.008809129	1.156552269	2.055067055	black
RTL8B	0.001144593	0.755066217	0.286	0.107	1	0.008824747	1.551130818	2.054297735	black
AGO3	0.001145544	0.535658561	0.846	0.557	1	0.00882483	1.100399977	2.054293644	black
SEM1	0.001151479	0.523407865	0.418	0.186	1	0.008863274	1.074245346	2.052405815	black
UBE2J2	0.001154953	0.358830069	0.473	0.214	1	0.008882727	0.736123274	2.051453701	black
TALDO1	0.001166692	0.806082999	0.275	0.1	1	0.008965657	1.650388737	2.04741787	black
WSB1	0.001168285	-0.711150856	0.703	0.736	1	0.008970553	1.455854379	2.047180802	black
CLGN	0.001169931	0.743805543	0.451	0.229	1	0.008975851	1.522513687	2.046924363	black
TIGD2	0.001176224	0.525322458	0.418	0.193	1	0.009016757	1.074257957	2.044949615	black
PFKFB4	0.001180179	0.610690367	0.33	0.129	1	0.009039691	1.248157316	2.043846412	black
CCNL2	0.001183426	0.393304172	0.703	0.4	1	0.009057166	0.803523449	2.043007694	black
SLC25A21	0.001185768	0.622516101	0.176	0.043	1	0.009067692	1.271491151	2.042503237	black
ALG5	0.001189944	0.49282791	0.253	0.086	1	0.009091517	1.006040982	2.041363651	black
SDHC	0.001190821	0.379453627	0.44	0.2	1	0.009091517	0.774602841	2.041363651	black
TRPM7	0.001200482	-0.790192916	0.648	0.686	1	0.009157821	1.610577392	2.038207834	black
SRM	0.001202337	0.664654293	0.176	0.043	1	0.00916452	1.35449253	2.03789029	black
N4BP2L1	0.001204629	0.5652938	0.571	0.3	1	0.009174539	1.151738498	2.037415761	black
ACADVL	0.001206026	0.645985116	0.319	0.121	1	0.009177729	1.316042719	2.037264769	black
TUBB3	0.001209061	0.423751473	0.769	0.471	1	0.009193368	0.86298062	2.03652536	black
CCK	0.001213514	0.088147269	0.604	0.307	1	0.009219761	0.179404406	2.035280359	black
ARHGEF28	0.001223503	0.475514762	0.593	0.329	1	0.009288127	0.966280158	2.032071841	black
INTS14	0.001227934	0.95638856	0.187	0.05	1	0.009304895	1.942701129	2.031288547	black
KIF13A	0.001228455	0.562178064	0.495	0.243	1	0.009304895	1.141945862	2.031288547	black
NDUFA12	0.00122927	0.307841734	0.341	0.136	1	0.009304895	0.625315389	2.031288547	black
FBXO25	0.001229678	0.471875252	0.275	0.093	1	0.009304895	0.958514794	2.031288547	black
EIF3I	0.001231267	0.613198707	0.264	0.093	1	0.009307983	1.245495138	2.031144428	black
RPN1	0.00123207	0.689441511	0.451	0.221	1	0.009307983	1.400355284	2.031144428	black
DNAL1	0.001236576	0.642682508	0.308	0.114	1	0.009334505	1.304586821	2.02990871	black
CCDC138	0.001241148	1.034431643	0.209	0.064	1	0.009361489	2.09850501	2.028655082	red
NDUFS4	0.001243606	0.448493166	0.703	0.436	1	0.009372494	0.909609088	2.02814481	black
PSMA6	0.001244964	0.797649452	0.275	0.1	1	0.009375199	1.617648647	2.028019505	black
TRANK1	0.001251843	-0.772874514	0.725	0.714	1	0.009419438	1.565824455	2.025975015	black
LSM6	0.001253335	0.622556337	0.176	0.043	1	0.009423111	1.261178178	2.025805704	black
DCAF12L1	0.001261043	0.892981859	0.187	0.05	1	0.009473472	1.806940615	2.023490844	black
DDX3Y	0.001265128	0.474754036	0.67	0.371	1	0.009496557	0.960158619	2.02243382	black
ASPH	0.001266791	0.458671713	0.56	0.286	1	0.009501439	0.927530814	2.02221063	black
ELMO1	0.001272942	0.712960897	0.484	0.257	1	0.009539446	1.440520973	2.02047683	black
DDX1	0.001274136	0.664339455	0.396	0.179	1	0.009539446	1.342282477	2.02047683	black
ZFR2	0.001274908	0.526889619	0.297	0.114	1	0.009539446	1.064568268	2.02047683	black
EIF3K	0.001285474	0.661606973	0.33	0.136	1	0.009606256	1.334756247	2.017445857	black
CCT6A	0.001285885	0.746392943	0.275	0.1	1	0.009606256	1.505807351	2.017445857	black
CDK5RAP1	0.001294975	0.806412551	0.187	0.05	1	0.009666466	1.624705382	2.01473226	black
YRDC	0.001300634	0.672488445	0.143	0.029	1	0.009700991	1.353842903	2.013183889	black
WDR13	0.001301707	0.617703539	0.308	0.114	1	0.009701281	1.243542802	2.013170921	black
NAPEPLD	0.001306324	0.630986756	0.176	0.043	1	0.009727969	1.269531357	2.011977818	black
TAOK3	0.001310141	0.445032872	0.527	0.264	1	0.009748653	0.894985753	2.011055385	black
ADD1	0.001317115	-0.892973681	0.637	0.671	1	0.009792783	1.794067928	2.009093847	black
RNF227	0.001319457	0.59487971	0.451	0.221	1	0.009802428	1.194914859	2.008666357	black
SNU13	0.001328061	0.762736102	0.275	0.1	1	0.009858541	1.530191522	2.006187353	black
RHOBTB3	0.001329526	0.583046616	0.33	0.129	1	0.009861615	1.169621798	2.006051944	black
SF3B1	0.00134062	0.496095168	0.802	0.493	1	0.009936048	0.993572615	2.002786318	black
NOM1	0.001344584	0.800757218	0.264	0.093	1	0.00994742	1.603347792	2.002289529	black
ANKRD55	0.001345051	0.435441336	0.637	0.329	1	0.00994742	0.871879628	2.002289529	black
BC1	0.00134634	-1.624456519	0.154	0.307	1	0.00994742	3.252632279	2.002289529	blue
NUCKS1	0.001347174	0.690735365	0.473	0.229	1	0.00994742	1.383052189	2.002289529	black
CABLES1	0.001347455	0.724123014	0.187	0.05	1	0.00994742	1.449903928	2.002289529	black
MRPL21	0.001350115	0.608577162	0.33	0.136	1	0.009959224	1.218234243	2.001774497	black
ERGIC3	0.001352204	0.670428201	0.44	0.214	1	0.009966792	1.341824894	2.001444588	black
GM45895	0.001353987	-1.767298407	0.088	0.243	1	0.009972101	3.536741149	2.001213341	blue
SERBP1	0.001366247	0.281317735	0.571	0.279	1	0.010054504	0.561971374	1.997639336	black
HEATR6	0.001373698	0.505555331	0.418	0.193	1	0.010101416	1.008895192	1.99561775	black
PARVB	0.001383525	0.863966879	0.187	0.05	1	0.01016571	1.721767008	1.992862285	black
BRD8	0.001385483	0.235778158	0.56	0.271	1	0.010172133	0.469808721	1.992587969	black
TSR2	0.001394369	0.883007548	0.143	0.029	1	0.010229367	1.757318557	1.990151229	black
SLC25A25	0.001396752	0.573033402	0.33	0.129	1	0.01023885	1.14019253	1.989748813	black
SECISBP2	0.001401186	0.569220802	0.275	0.1	1	0.010263332	1.132016036	1.98871164	black
INF2	0.001405636	1.139800538	0.11	0.014	1	0.010283775	2.265749596	1.987847453	black
SLC38A1	0.001406169	0.393633229	0.824	0.579	1	0.010283775	0.782482811	1.987847453	black
FAM57B	0.001407866	0.686615147	0.319	0.129	1	0.010288164	1.364758921	1.987662123	black
NRD1	0.001414763	0.369445953	0.692	0.364	1	0.010330524	0.733674468	1.985877668	black
LMBR1L	0.001418558	0.624902574	0.176	0.043	1	0.010343343	1.2406435	1.985339079	black
SENP8	0.001418723	0.515891937	0.44	0.193	1	0.010343343	1.024220423	1.985339079	black
X3830408C21RIK	0.001426997	1.193256639	0.143	0.029	1	0.010393483	2.366512964	1.983238884	black
DNAJA2	0.001427816	0.663145366	0.396	0.186	1	0.010393483	1.315175677	1.983238884	black
NPM1	0.001430192	0.561355996	0.516	0.257	1	0.010402709	1.113086718	1.98285353	black
GOLGB1	0.001437492	0.556772794	0.846	0.529	1	0.010447707	1.102955212	1.980978999	black
TYW1	0.001440628	0.862263079	0.396	0.186	1	0.010462393	1.707599047	1.980368971	black
FBXO10	0.001442126	0.464311105	0.648	0.35	1	0.010465175	0.919453692	1.980253502	black
X4732440D04RIK	0.001444742	0.820183598	0.198	0.057	1	0.010476052	1.623801402	1.979802335	black
CDH22	0.001452659	0.625846851	0.352	0.143	1	0.010517628	1.237976511	1.978082191	black
DHPS	0.001452717	0.182367171	0.341	0.129	1	0.010517628	0.360737253	1.978082191	black
GPR83	0.001457515	1.229130538	0.11	0.014	1	0.010544228	2.429972894	1.97698521	black
ARL3	0.001462516	0.48982993	0.703	0.393	1	0.010572259	0.96782176	1.975832226	black
CEP68	0.001464472	0.401047052	0.385	0.164	1	0.010578245	0.792303086	1.975586362	black
KRIT1	0.00147612	0.403234478	0.912	0.629	1	0.010654181	0.79537191	1.972479916	black
LY6E	0.001478008	0.576647305	0.275	0.1	1	0.010659606	1.137297754	1.972258857	black
MTO1	0.001480559	0.413829769	0.352	0.143	1	0.010669802	0.816007596	1.971843632	black
TM9SF1	0.001484111	1.008569284	0.11	0.014	1	0.010687194	1.98802755	1.971136324	black
PTDSS2	0.001488181	0.634351487	0.363	0.157	1	0.010708281	1.249850207	1.970280253	black
MAGT1	0.00149355	0.886886955	0.209	0.064	1	0.010735235	1.746447537	1.969188438	black
PIN1	0.001494337	0.854420629	0.143	0.029	1	0.010735235	1.682515223	1.969188438	black
ADAMTS2	0.001495359	1.088126204	0.231	0.079	1	0.010735235	2.142725539	1.969188438	black
EN1	0.001498983	0.559240168	0.769	0.521	1	0.010753026	1.100847106	1.968469305	black
TNIK	0.001501693	0.273300075	0.802	0.479	1	0.010762083	0.537882885	1.968103683	black
GM26691	0.001502539	0.335510516	0.813	0.543	1	0.010762083	0.660319482	1.968103683	black
AA465934	0.001511953	0.928272359	0.209	0.064	1	0.010821248	1.824726005	1.965722653	black
COMMD7	0.001514992	1.151897228	0.22	0.071	1	0.010834694	2.263689275	1.965183369	black
OMG	0.001516141	0.543641609	0.264	0.093	1	0.010834694	1.068355449	1.965183369	black
ALG8	0.001517427	0.795649383	0.143	0.029	1	0.010835627	1.563567159	1.965145945	black
SSBP3	0.00151975	0.579672306	0.593	0.357	1	0.010843968	1.138946982	1.964811791	black
TARDBP	0.001528015	-1.147871875	0.429	0.507	1	0.010894656	2.253027396	1.96278648	black
PAK6	0.001532697	0.780697596	0.264	0.093	1	0.010919742	1.531562886	1.961787629	black
AP3S2	0.001534235	0.478873142	0.429	0.193	1	0.010922406	0.939396679	1.961681699	black
RPS14	0.00153561	0.598870327	0.626	0.357	1	0.010923902	1.174757319	1.961622185	black
ZFP420	0.001536887	0.783076228	0.187	0.05	1	0.010924709	1.536074607	1.961590139	black
DUSP8	0.001540256	0.611422731	0.253	0.086	1	0.010932087	1.199181517	1.961296918	black
SMIM19	0.001540256	0.500238727	0.253	0.086	1	0.010932087	0.981116673	1.961296918	black
PURB	0.001546176	0.616647134	0.407	0.186	1	0.010965815	1.208603156	1.959959091	black
OTULINL	0.001548881	0.833198232	0.198	0.057	1	0.010976697	1.632675534	1.959528324	black
BTG2	0.001558698	0.84482114	0.198	0.057	1	0.011037932	1.653409831	1.957112285	black
GLUD1	0.001561834	0.443433996	0.681	0.379	1	0.011051799	0.867608337	1.956567033	black
USP45	0.001564189	0.300212786	0.736	0.407	1	0.011059252	0.587298545	1.956274261	black
CCDC32	0.001566605	0.845435372	0.11	0.014	1	0.011059252	1.653903458	1.956274261	black
MIR670HG	0.001567442	0.553114054	0.429	0.2	1	0.011059252	1.082042787	1.956274261	black
GM17276	0.001567601	-0.981324728	0.484	0.557	1	0.011059252	1.919740306	1.956274261	black
SLC30A5	0.001573418	0.673183687	0.363	0.157	1	0.011085195	1.316246881	1.955256651	black
PSMC1	0.001574495	0.66132074	0.451	0.229	1	0.011085195	1.293051775	1.955256651	black
PDXK	0.001574823	0.746549904	0.253	0.086	1	0.011085195	1.459696666	1.955256651	black
ZFP112	0.001585556	0.715416902	0.286	0.107	1	0.01115238	1.396946257	1.952632448	black
PCP4L1	0.001595028	0.895279085	0.11	0.014	1	0.011201839	1.746430464	1.95071067	black
X2810454H06RIK	0.001595028	0.879183374	0.11	0.014	1	0.011201839	1.715032389	1.95071067	black
MAU2	0.001596974	0.496623699	0.571	0.314	1	0.011201839	0.968769148	1.95071067	black
A930016O22RIK	0.001598485	0.829987992	0.198	0.057	1	0.011201839	1.619066432	1.95071067	black
GPR162	0.001598557	0.54699161	0.484	0.236	1	0.011201839	1.067022371	1.95071067	black
RABEPK	0.001603106	0.895752652	0.253	0.093	1	0.011225332	1.746539232	1.949800794	black
RET	0.001608431	0.482361745	0.758	0.514	1	0.011250043	0.940048673	1.948845825	black
TMEM128	0.001609033	0.600105432	0.275	0.1	1	0.011250043	1.169512965	1.948845825	black
SMIM20	0.001619305	0.780991699	0.187	0.05	1	0.011313431	1.520126666	1.946405664	black
D7ERTD443E	0.001623925	0.999366124	0.11	0.014	1	0.011337266	1.944258481	1.945491682	black
FARP1	0.001625626	0.408523892	0.813	0.514	1	0.011340709	0.794725958	1.945359803	black
BEX3	0.001629207	0.370231507	0.593	0.293	1	0.01135724	0.719999274	1.94472718	black
MDGA2	0.001630709	-0.471957598	0.989	1	1	0.011359277	0.917792017	1.944649308	black
TMEM126B	0.001637881	0.720498405	0.143	0.029	1	0.011384587	1.400420297	1.943682718	black
ACTB	0.001638044	0.413811745	0.791	0.55	1	0.011384587	0.804318737	1.943682718	black
GM37240	0.001638338	0.525102727	0.396	0.179	1	0.011384587	1.020633095	1.943682718	black
ELAVL3	0.001639196	-0.465705912	0.912	0.864	1	0.011384587	0.905184532	1.943682718	black
CLTA	0.001648518	0.445047914	0.571	0.3	1	0.011440863	0.864078863	1.941541207	black
CORO7	0.001654217	0.589556234	0.385	0.171	1	0.011471926	1.143953501	1.940363677	black
ZFP612	0.001662136	0.523061666	0.659	0.379	1	0.011507349	1.014229491	1.939024703	black
G6PC3	0.001662347	0.67546897	0.308	0.121	1	0.011507349	1.309751019	1.939024703	black
TPM4	0.001663004	0.690587297	0.143	0.029	1	0.011507349	1.339065828	1.939024703	black
SF3A3	0.00166439	0.411103051	0.253	0.086	1	0.011508454	0.797121833	1.938983016	black
MRPL23	0.00167848	0.640919331	0.275	0.1	1	0.011593353	1.240685836	1.935790942	black
TRMT13	0.001679504	0.616917258	0.44	0.207	1	0.011593353	1.19422284	1.935790942	black
LHFPL5	0.001680944	1.055401255	0.165	0.043	1	0.011593353	2.04303619	1.935790942	black
WSCD1	0.001681611	0.330289655	0.297	0.107	1	0.011593353	0.639371722	1.935790942	black
HNRNPAB	0.001683169	0.712518793	0.11	0.014	1	0.011595576	1.379228103	1.935707685	black
ARF1	0.001687106	0.567416676	0.418	0.193	1	0.01160655	1.098119708	1.935296852	black
RHOB	0.001687236	0.96728678	0.209	0.064	1	0.01160655	1.87198706	1.935296852	black
ATXN7L2	0.001688481	0.58446646	0.143	0.029	1	0.011606603	1.131114939	1.935294864	black
GNA11	0.00169011	0.809719037	0.341	0.15	1	0.011609302	1.566963336	1.935193894	black
FYN	0.001694062	0.515580834	0.692	0.4	1	0.011627933	0.997389825	1.934497482	black
ANGEL2	0.001695814	0.3956503	0.418	0.179	1	0.01163145	0.765332542	1.934366134	black
SERF1	0.00170172	0.977475577	0.154	0.036	1	0.011663433	1.889629979	1.933173599	black
RTRAF	0.001704692	0.537147095	0.286	0.107	1	0.011669393	1.038279416	1.932951747	black
KIF5C	0.001705077	0.451589531	0.901	0.643	1	0.011669393	0.872900773	1.932951747	black
ADAMTS6	0.001708593	-1.281061868	0.407	0.514	1	0.011684935	2.475490238	1.932373681	black
SH3D19	0.001713006	0.596795464	0.56	0.314	1	0.011706582	1.152752146	1.931569886	black
METTL2	0.001725777	0.605778306	0.407	0.186	1	0.011785274	1.168340569	1.928660298	black
POLR1C	0.001728644	0.723133618	0.209	0.064	1	0.011796266	1.394386335	1.928255442	black
ATP6V1D	0.001737025	0.616644356	0.462	0.236	1	0.011844847	1.187947179	1.92647053	black
CYSTM1	0.001740315	0.70801044	0.33	0.143	1	0.011851411	1.363790898	1.926229927	black
DSC2	0.001740514	0.524762436	0.143	0.029	1	0.011851411	1.010813108	1.926229927	black
FBXL15	0.001745219	0.52406363	0.198	0.057	1	0.011874833	1.009017699	1.925372495	black
MYNN	0.001750676	0.540502891	0.275	0.1	1	0.011903325	1.040106845	1.924331696	black
FAM131A	0.001758623	0.540987268	0.253	0.086	1	0.01194777	1.040163328	1.92271314	black
WWC1	0.001760112	0.581668568	0.505	0.271	1	0.01194777	1.118381798	1.92271314	black
ARL6IP5	0.001761032	0.750415623	0.275	0.107	1	0.01194777	1.442833979	1.92271314	black
RAB3IP	0.001763628	0.455681539	0.264	0.093	1	0.011956736	0.875996427	1.922387351	black
DYNC1I1	0.001768056	-0.403042782	0.934	0.85	1	0.011978102	0.774491839	1.921611984	black
E130311K13RIK	0.001776857	0.93688648	0.154	0.036	1	0.012029042	1.798605581	1.919768957	black
TBC1D9	0.001780869	0.558826371	0.571	0.3	1	0.012042571	1.072544719	1.91928079	black
MPC1	0.001781423	0.425563175	0.637	0.343	1	0.012042571	0.816775227	1.91928079	black
X9530062K07RIK	0.001789363	0.688622822	0.198	0.057	1	0.012087538	1.320545911	1.917662134	black
SELENOO	0.001792496	0.749204657	0.209	0.064	1	0.012099994	1.436386288	1.91721484	black
CHMP5	0.001802847	0.814153463	0.242	0.086	1	0.012161113	1.559125588	1.915026661	black
UBE2L3	0.001813296	0.47936845	0.407	0.179	1	0.012211314	0.917145739	1.913237594	black
HDAC1	0.001813304	0.602568293	0.286	0.107	1	0.012211314	1.152856311	1.913237594	black
CHUK	0.001814193	0.462958242	0.736	0.421	1	0.012211314	0.885749113	1.913237594	black
DSCAML1	0.001816164	0.57221439	0.341	0.143	1	0.012215816	1.094690485	1.913077519	black
ARFRP1	0.001822625	0.526928974	0.286	0.107	1	0.012250495	1.007407244	1.911846367	black
UBE2S	0.00182517	0.278169525	0.363	0.15	1	0.012258821	0.531735316	1.911551292	black
WDR5	0.001835687	0.761481582	0.275	0.107	1	0.012320635	1.453947739	1.909366914	black
NFIX	0.001855033	0.784668068	0.154	0.036	1	0.012438429	1.494976638	1.905234454	black
RPL10	0.001857388	0.535185508	0.78	0.436	1	0.012438429	1.019653868	1.905234454	black
FRMD4A	0.001857783	-0.284796407	1	0.993	1	0.012438429	0.542603927	1.905234454	black
LEPROT	0.00185854	0.920118323	0.209	0.064	1	0.012438429	1.753041131	1.905234454	black
MBD5	0.001869449	-0.465361553	0.989	0.929	1	0.012502523	0.88558413	1.903002354	black
UGGT2	0.001871318	-0.644302001	0.604	0.65	1	0.01250611	1.226027955	1.902877769	black
STX6	0.001873536	0.371972249	0.352	0.143	1	0.012511226	0.707751647	1.902700133	black
TCEAL5	0.00187511	0.49826097	0.484	0.236	1	0.012511226	0.948041215	1.902700133	black
RMDN1	0.001876084	0.522945024	0.824	0.607	1	0.012511226	0.995007567	1.902700133	black
DEGS1	0.00188449	0.658161531	0.33	0.136	1	0.012558357	1.251209293	1.901067192	black
PSIP1	0.001890941	0.464747428	0.714	0.414	1	0.012592402	0.882969647	1.899891413	black
MVB12A	0.001900833	0.442434627	0.264	0.093	1	0.012649302	0.839711476	1.897933447	black
SEC61A1	0.001903816	0.472049877	0.418	0.193	1	0.012660176	0.895743085	1.897560254	black
FLVCR1	0.001907821	0.38648875	0.319	0.129	1	0.012677825	0.733151864	1.896955253	black
MRAS	0.0019201	0.565681575	0.352	0.15	1	0.012750388	1.071670516	1.894476615	black
PDK3	0.001923667	0.578433048	0.231	0.079	1	0.012765043	1.095539308	1.893977723	black
MASP2	0.001927262	-1.405092339	0	0.1	1	0.012776864	2.660648756	1.893575733	black
GM26724	0.001928172	0.786227417	0.165	0.043	1	0.012776864	1.488781157	1.893575733	black
UTP3	0.001936358	0.86597648	0.154	0.036	1	0.012803982	1.638994675	1.892654955	black
PPP1R14A	0.001936358	0.838755428	0.154	0.036	1	0.012803982	1.587474617	1.892654955	black
ADRB1	0.001936358	0.796007046	0.154	0.036	1	0.012803982	1.506566679	1.892654955	black
TAGLN3	0.001944655	0.627818342	0.396	0.186	1	0.012849785	1.187269865	1.891104137	black
PIK3CB	0.001948037	0.545056524	0.286	0.107	1	0.012863073	1.030513981	1.890655252	black
COL4A3BP	0.001951913	-1.00247936	0.418	0.514	1	0.01287819	1.894831526	1.890145175	black
SUMO1	0.001953071	0.392001752	0.593	0.307	1	0.01287819	0.74094022	1.890145175	black
DIPK1B	0.001958064	0.67385121	0.407	0.186	1	0.012902047	1.273134977	1.889341383	black
OLFM2	0.001959521	0.58381859	0.582	0.336	1	0.012902587	1.103022018	1.88932322	black
MUS81	0.001964186	0.613312098	0.154	0.036	1	0.012917416	1.158438834	1.888824363	black
PCGF6	0.001964527	0.389793663	0.495	0.236	1	0.012917416	0.736251767	1.888824363	black
ITFG2	0.001974716	0.659071945	0.429	0.2	1	0.012975322	1.243590886	1.886881843	black
AKAP9	0.001977392	0.439024628	0.923	0.664	1	0.012983812	0.828262883	1.886597769	black
VDAC1	0.001979424	0.637061223	0.462	0.243	1	0.012988066	1.201787656	1.886455514	black
FUNDC1	0.001981458	0.751349035	0.165	0.043	1	0.01299233	1.417279414	1.88631295	black
GUF1	0.001989186	0.412675638	0.604	0.321	1	0.013033888	0.777863046	1.884926013	black
DAGLB	0.00199148	0.799382788	0.253	0.093	1	0.013039815	1.506619585	1.884728576	black
CRNKL1	0.001995842	1.005818995	0.176	0.05	1	0.01305659	1.895134222	1.884170245	black
B830012L14RIK	0.001998005	-0.536716631	0.824	0.8	1	0.01305659	1.011265506	1.884170245	black
ZFP239	0.001998641	0.71149073	0.286	0.114	1	0.01305659	1.340569664	1.884170245	black
HIVEP2	0.001999608	0.353730407	0.813	0.536	1	0.01305659	0.666488308	1.884170245	black
RAPH1	0.002002419	-0.726579909	0.681	0.707	1	0.013065857	1.368776359	1.883862108	black
GM10862	0.002011829	-1.130332836	0.385	0.471	1	0.013118131	2.127431128	1.882128042	black
PDHA1	0.002021388	0.673311769	0.209	0.064	1	0.013171307	1.266076013	1.880371131	black
EXOSC10	0.002023822	0.572523422	0.33	0.136	1	0.013178015	1.076429919	1.880150015	black
PABPC1	0.002025785	-1.232045116	0.363	0.471	1	0.013181651	2.316281996	1.880030176	black
CDIP1	0.002030492	0.53257548	0.758	0.443	1	0.013203125	1.000881496	1.879323277	black
GNG3	0.00203365	0.448294669	0.604	0.336	1	0.013208031	0.842418265	1.879161908	black
SNX9	0.002034062	0.915813173	0.264	0.1	1	0.013208031	1.72096123	1.879161908	black
TPM3	0.002037046	0.381949347	0.495	0.236	1	0.013218262	0.717616234	1.878825656	black
TAF7	0.002076489	0.551237408	0.198	0.057	1	0.013464888	1.031253426	1.870797248	black
GM15283	0.002081029	0.806984111	0.242	0.086	1	0.013485012	1.509180255	1.870148662	black
UBR7	0.002090468	0.345252184	0.275	0.1	1	0.013536826	0.64509789	1.868483154	black
GM10516	0.002094119	0.409937373	0.363	0.15	1	0.013551119	0.7657732	1.868024852	black
SEC61G	0.002099401	0.705726785	0.374	0.171	1	0.013575934	1.317754431	1.867230293	black
MXD4	0.002101219	0.767488718	0.253	0.093	1	0.013578333	1.433019292	1.86715356	black
HCN2	0.002102859	0.537367004	0.396	0.186	1	0.01357958	1.003325267	1.867113647	black
FAF2	0.002122872	0.408324322	0.495	0.25	1	0.013699385	0.760830275	1.863298937	black
YAF2	0.002125582	0.408583656	0.484	0.236	1	0.013703356	0.761262054	1.863173046	black
OTX2	0.002126408	1.22150909	0.121	0.021	1	0.013703356	2.275882811	1.863173046	black
MRPS17	0.002127997	0.627469928	0.22	0.071	1	0.013704181	1.169068662	1.863146918	black
ZFP536	0.002130238	0.633090821	0.363	0.171	1	0.01370921	1.179440338	1.862987582	black
SLC6A6	0.002139513	0.396189533	0.659	0.35	1	0.01375946	0.73746665	1.861398621	black
PARP2	0.002144449	0.688213948	0.286	0.114	1	0.013779811	1.280598736	1.86075673	black
FJX1	0.002145615	0.544245987	0.209	0.064	1	0.013779811	1.012709383	1.86075673	black
TMEM115	0.002161378	0.984380781	0.121	0.021	1	0.013862068	1.829148785	1.858171979	black
GEMIN8	0.002161378	1.064014465	0.121	0.021	1	0.013862068	1.977121865	1.858171979	black
RSAD1	0.00217123	0.971528892	0.187	0.057	1	0.013915746	1.803637076	1.856493504	black
NUDC	0.002181953	0.401912757	0.264	0.093	1	0.013974924	0.745407709	1.854650534	black
MAP9	0.002185189	0.492237318	0.429	0.2	1	0.013986105	0.912757241	1.854303214	black
LACTB	0.002202949	0.69027941	0.22	0.071	1	0.014090166	1.277765098	1.851083893	black
ZC3H13	0.002204936	0.508984203	0.56	0.286	1	0.014093265	0.942123853	1.850988397	black
ACTR10	0.002216807	0.452365936	0.484	0.229	1	0.014159496	0.836402998	1.848952211	black
IER3IP1	0.002224757	0.571773354	0.484	0.243	1	0.014185057	1.056733744	1.848168922	black
CDK5R1	0.002225379	0.57974105	0.319	0.129	1	0.014185057	1.071459391	1.848168922	black
METTL4	0.002228466	0.753428893	0.22	0.071	1	0.014185057	1.392463865	1.848168922	black
RAE1	0.002229407	0.458936136	0.418	0.193	1	0.014185057	0.848191505	1.848168922	black
ACACB	0.002232903	1.015192255	0.121	0.021	1	0.014185057	1.876246776	1.848168922	black
EZH2	0.002232903	0.997014795	0.121	0.021	1	0.014185057	1.84265176	1.848168922	black
APH1C	0.002232903	0.882415518	0.121	0.021	1	0.014185057	1.630852937	1.848168922	black
HEXIM2	0.002232903	0.911217574	0.121	0.021	1	0.014185057	1.684084001	1.848168922	black
CCDC25	0.002238382	0.939110299	0.165	0.043	1	0.014210239	1.73491106	1.84739861	black
ACIN1	0.002253497	0.363981913	0.67	0.407	1	0.01428357	0.671606038	1.84516322	black
ADGRG1	0.002254254	0.669793148	0.22	0.071	1	0.01428357	1.235877682	1.84516322	black
CCT5	0.002254499	0.704942589	0.286	0.114	1	0.01428357	1.300734138	1.84516322	black
MAT2A	0.002269336	0.413540014	0.868	0.636	1	0.014359066	0.762102056	1.842873796	black
EEF1A2	0.002270954	0.593305811	0.473	0.236	1	0.014359066	1.093387732	1.842873796	black
DNAJC18	0.002271007	0.326481088	0.495	0.243	1	0.014359066	0.601663442	1.842873796	black
LETMD1	0.002276806	0.584873711	0.209	0.064	1	0.014386043	1.077371668	1.842058633	black
RHOQ	0.002278406	0.366507306	0.374	0.157	1	0.014386463	0.675123302	1.84204596	black
MYEF2	0.002288042	-1.006433154	0.484	0.557	1	0.014437591	1.852345525	1.840505271	black
NF2	0.002303563	0.561694682	0.374	0.171	1	0.014525334	1.03232398	1.837873872	black
C230034O21RIK	0.002306591	0.880510343	0.121	0.021	1	0.014525334	1.618266954	1.837873872	black
ZNHIT3	0.002306591	0.863137135	0.121	0.021	1	0.014525334	1.586337188	1.837873872	black
RTL1	0.002310837	0.916950371	0.187	0.057	1	0.014542311	1.68477395	1.837366561	black
MOB4	0.002315976	0.380228393	0.418	0.193	1	0.014564882	0.698362843	1.83669304	black
NAV1	0.002331278	-0.584844617	0.857	0.807	1	0.014651292	1.072677601	1.83412409	black
RPL30	0.002338245	0.448069091	0.626	0.343	1	0.014685241	0.821363928	1.833118921	black
PTRH2	0.002344265	0.603686152	0.121	0.021	1	0.014703368	1.10630509	1.832583183	black
MYCBPAP	0.002344265	0.920181379	0.121	0.021	1	0.014703368	1.686308921	1.832583183	black
NIPSNAP2	0.002347529	0.520324475	0.505	0.257	1	0.014714005	0.953374455	1.832269096	black
NENF	0.002350346	0.537319078	0.648	0.386	1	0.014721829	0.984389098	1.832038241	black
RBMS3	0.002358874	-0.430211139	0.945	0.936	1	0.014765386	0.787611276	1.830755192	black
ATG16L2	0.002376247	0.682563554	0.44	0.214	1	0.01486422	1.24762917	1.827857879	black
THOC6	0.002382501	0.963729437	0.121	0.021	1	0.01489341	1.760739331	1.827005863	black
NDFIP2	0.002390941	0.406727911	0.648	0.4	1	0.014928267	0.742681345	1.825990608	black
ZFHX4	0.002391259	-0.738449016	0.615	0.679	1	0.014928267	1.348400967	1.825990608	black
NPTXR	0.002395767	0.327048646	0.341	0.136	1	0.014946461	0.597014752	1.82546162	black
CCDC191	0.002398095	0.565859583	0.242	0.086	1	0.014951048	1.032879544	1.82532836	black
CKLF	0.002407995	0.70164488	0.231	0.079	1	0.015002801	1.279679341	1.823827661	black
ATP1A1	0.002410278	0.551320491	0.538	0.286	1	0.01500706	1.00544559	1.823704374	black
SLC5A3	0.002414807	0.596237698	0.22	0.071	1	0.015025285	1.087047024	1.82317728	black
CAMK2N2	0.002420687	0.538791604	0.352	0.157	1	0.015040697	0.982072722	1.822732044	black
GPR37	0.002421307	0.939784762	0.121	0.021	1	0.015040697	1.7129758	1.822732044	black
INTS3	0.002422092	0.468179093	0.505	0.257	1	0.015040697	0.853365035	1.822732044	black
DLD	0.002423747	0.566791846	0.341	0.143	1	0.01504102	1.033104375	1.822722719	black
PRKAA2	0.002436179	0.40076249	0.418	0.193	1	0.015108176	0.729703513	1.820787953	black
ARXES1	0.002442561	0.707785668	0.22	0.071	1	0.015137748	1.288126547	1.819938727	black
TMEM219	0.002445249	0.706753854	0.275	0.107	1	0.015144405	1.286113754	1.819747775	black
PRKN	0.002450117	-0.420251018	0.934	0.9	1	0.015164541	0.764508347	1.819170719	black
LTA4H	0.002453376	0.693700425	0.264	0.1	1	0.015174702	1.261757707	1.818879824	black
GM48960	0.002458935	0.668875856	0.165	0.043	1	0.015199068	1.216138738	1.818183041	black
PPP1CA	0.002464541	0.391149594	0.275	0.1	1	0.01522369	0.710906592	1.817480069	black
DAB2IP	0.00247105	0.572322657	0.319	0.129	1	0.015253859	1.039692935	1.816620262	black
PPP1R9A	0.002476147	-0.554152267	0.835	0.821	1	0.015275271	1.006346659	1.816011083	black
SNX30	0.002483329	0.550084859	0.505	0.264	1	0.015309511	0.998425293	1.815038674	black
GM19705	0.002487396	0.46023128	0.209	0.064	1	0.015324513	0.835141809	1.814613314	black
FEZ1	0.002489924	0.419338566	0.473	0.236	1	0.015330022	0.760871895	1.814457234	black
CNTROB	0.002492017	0.76707704	0.165	0.043	1	0.015332851	1.391767007	1.81437709	black
TOMM20	0.002498809	0.495184391	0.495	0.264	1	0.01534981	0.898213483	1.813897004	black
TMEM59	0.002499359	0.716817641	0.626	0.379	1	0.01534981	1.300233372	1.813897004	black
BAIAP2L1	0.002500661	0.894904869	0.121	0.021	1	0.01534981	1.623265261	1.813897004	black
ZFP2	0.002502578	0.917988784	0.264	0.107	1	0.01534981	1.665137106	1.813897004	black
ASCC2	0.002502953	0.312855977	0.352	0.15	1	0.01534981	0.567488519	1.813897004	black
STAM2	0.00253192	0.556891965	0.352	0.157	1	0.015517313	1.007519735	1.809183466	black
BICD1	0.002533742	-0.496946572	0.945	0.857	1	0.015518342	0.899053218	1.809154682	black
ZFP940	0.002541223	0.668846092	0.121	0.021	1	0.015554012	1.209379133	1.808157582	black
AGFG2	0.00254301	0.62335732	0.396	0.193	1	0.015554798	1.127114573	1.808135617	black
GM20342	0.002554614	0.868434667	0.242	0.093	1	0.015611394	1.568877879	1.806558326	black
CBY1	0.002556523	0.598534261	0.22	0.071	1	0.015611394	1.081287053	1.806558326	black
CHCHD6	0.002557254	0.567647422	0.418	0.2	1	0.015611394	1.025488177	1.806558326	black
MICOS13	0.002564385	0.627885987	0.297	0.121	1	0.015644746	1.133730699	1.805631472	black
TCF25	0.002575985	0.414610312	0.879	0.529	1	0.015705305	0.747937778	1.803953631	black
NELFB	0.002580756	0.617874765	0.462	0.243	1	0.015724177	1.114295168	1.803432074	black
HNRNPF	0.002586585	0.672448918	0.242	0.086	1	0.015749468	1.212246599	1.802734106	black
STIP1	0.002592783	0.791920447	0.363	0.179	1	0.015772456	1.427120367	1.802100669	black
CCDC134	0.002593723	0.528312337	0.165	0.043	1	0.015772456	0.952072016	1.802100669	black
TPR	0.002608811	0.358579488	0.835	0.493	1	0.015853933	0.645393941	1.799862968	black
YWHAB	0.002612809	0.44852116	0.505	0.25	1	0.015867954	0.807104441	1.799479072	black
ZCCHC10	0.002624159	0.801336534	0.121	0.021	1	0.015923503	1.440772153	1.797961395	black
FUCA1	0.00262535	0.393938103	0.253	0.093	1	0.015923503	0.708285501	1.797961395	black
GRHPR	0.002628459	0.574703469	0.165	0.043	1	0.015932061	1.033160548	1.797728051	black
UBXN1	0.002631214	0.614023709	0.231	0.079	1	0.015938463	1.10374051	1.797553569	black
RBM4	0.002636241	0.490322344	0.484	0.236	1	0.01595861	0.88111168	1.797004951	black
PRRC2C	0.002639319	-0.573302541	0.681	0.771	1	0.015966943	1.030097517	1.796778216	black
ANXA7	0.002648587	0.401697649	0.495	0.243	1	0.01601269	0.721262472	1.795535708	black
ITGAE	0.002651167	0.785308199	0.176	0.05	1	0.016017964	1.409936593	1.795392682	black
SLC25A36	0.002654262	-0.923080469	0.429	0.529	1	0.016026343	1.657082284	1.795165578	black
CCNH	0.002657148	0.477026209	0.473	0.243	1	0.016033451	0.856249164	1.794972997	black
BAG1	0.002660408	0.548441563	0.231	0.079	1	0.016042807	0.984298841	1.794719634	black
RGS7	0.002678793	0.273019319	0.989	0.857	1	0.016143095	0.48925422	1.792013186	black
SPIRE1	0.00268048	0.415076232	0.835	0.514	1	0.016143095	0.743822081	1.792013186	black
PSMB4	0.002691514	0.459089325	0.297	0.121	1	0.016199153	0.822002964	1.790507683	black
FAM207A	0.00269921	0.825563371	0.165	0.043	1	0.016235057	1.47738377	1.789546171	black
SRP19	0.002703475	0.894002439	0.253	0.1	1	0.016241888	1.599695334	1.789363502	black
MFSD11	0.002703808	0.381801422	0.505	0.264	1	0.016241888	0.68318153	1.789363502	black
TBCE	0.002710437	0.502369675	0.604	0.336	1	0.016271295	0.898527287	1.788577879	black
X1700010K24RIK	0.002719577	0.859965285	0.176	0.05	1	0.01631572	1.537096572	1.787393745	black
MTA3	0.002735335	0.370066399	0.56	0.286	1	0.016399775	0.66062851	1.785162101	black
GMCL1	0.002746524	0.38596234	0.659	0.393	1	0.016440336	0.688591288	1.784089318	black
ATP1A2	0.002746609	0.73489385	0.187	0.057	1	0.016440336	1.311116268	1.784089318	black
VDAC3	0.002747357	0.418093937	0.516	0.264	1	0.016440336	0.745916926	1.784089318	black
GM17106	0.002754383	0.596677307	0.176	0.05	1	0.016471876	1.064028943	1.78325693	black
TM2D1	0.002757546	0.588303952	0.44	0.221	1	0.016480292	1.048966594	1.783035097	black
SRSF7	0.002764127	0.409662155	0.692	0.407	1	0.016509105	0.730131218	1.782276467	black
BCAS1	0.002775151	0.992326063	0.132	0.029	1	0.016558303	1.767317012	1.780984173	black
SSH1	0.002775894	0.634186861	0.341	0.157	1	0.016558303	1.129476762	1.780984173	black
NDUFA13	0.002783566	0.388511376	0.604	0.329	1	0.01658731	0.691637294	1.780224046	black
RPS25	0.002787291	0.476789162	0.571	0.307	1	0.01658731	0.848791531	1.780224046	black
LMAN1	0.002787297	0.391374567	0.308	0.121	1	0.01658731	0.696734414	1.780224046	black
MAP3K10	0.002788532	0.371221761	0.242	0.086	1	0.01658731	0.660857905	1.780224046	black
CRELD2	0.002789596	0.79826834	0.176	0.05	1	0.01658731	1.421096494	1.780224046	black
SNRPD1	0.002794697	0.737123761	0.319	0.143	1	0.016607122	1.311863311	1.779705635	black
RPL9	0.002799862	0.413952407	0.681	0.421	1	0.016627279	0.73649535	1.779178807	black
RPL19	0.002802776	0.423422729	0.648	0.364	1	0.016634058	0.753269793	1.779001791	black
SYT10	0.002817047	0.981182351	0.132	0.029	1	0.016708187	1.743630389	1.777070681	black
X4930555F03RIK	0.002819378	0.996195541	0.198	0.064	1	0.016711448	1.770225443	1.776985913	black
EFNB2	0.002825219	0.730487936	0.176	0.05	1	0.016735498	1.297610539	1.776361353	black
CIT	0.002843417	0.403820645	0.901	0.671	1	0.016832668	0.716316053	1.773847034	black
EBPL	0.002851433	0.684688479	0.341	0.157	1	0.016862274	1.214010088	1.773083856	black
RPS3	0.002852012	0.470986018	0.527	0.271	1	0.016862274	0.835097705	1.773083856	black
ARXES2	0.002855994	0.680574429	0.341	0.15	1	0.016875182	1.206489361	1.77275153	black
RNF165	0.002866644	0.433051776	0.44	0.214	1	0.016927454	0.767111533	1.771408351	black
RPL8	0.002879611	0.550381948	0.571	0.336	1	0.01698182	0.974184723	1.770015761	black
PPA1	0.002879622	0.489967718	0.308	0.129	1	0.01698182	0.867250583	1.770015761	black
MBD3	0.002884233	0.768616343	0.187	0.057	1	0.01698182	1.36046304	1.770015761	black
UTP6	0.002884233	0.58246481	0.187	0.057	1	0.01698182	1.030971893	1.770015761	black
PSTK	0.002885814	0.572844288	0.396	0.193	1	0.01698182	1.013943418	1.770015761	black
DCPS	0.00288671	0.791777248	0.198	0.064	1	0.01698182	1.401458208	1.770015761	black
TRP53I11	0.002902576	0.980494819	0.132	0.029	1	0.017053771	1.733690898	1.768179561	black
MEIS2	0.002902576	1.54570994	0.132	0.029	1	0.017053771	2.733092723	1.768179561	black
CCDC59	0.002907841	0.425224111	0.341	0.15	1	0.017074014	0.751653511	1.76766437	black
PPIL2	0.002921493	0.799867671	0.407	0.221	1	0.017143448	1.412487784	1.765901831	black
H2AFZ	0.002928846	0.650017132	0.341	0.157	1	0.017175849	1.147333397	1.76508178	black
VGLL4	0.002934419	0.562388013	0.308	0.129	1	0.017197787	0.99234908	1.764527439	black
A330076H08RIK	0.002937439	0.298603803	1	0.921	1	0.01720474	0.526842185	1.764351893	black
FHOD3	0.00295163	0.516589669	0.593	0.35	1	0.017277072	0.910504711	1.762529848	black
RAB9B	0.002965471	0.621355625	0.264	0.1	1	0.017347266	1.094063705	1.760768973	black
EIF1A	0.002969063	0.508555417	0.231	0.079	1	0.01735746	0.89531885	1.760513838	black
HPCA	0.002971879	0.696451123	0.176	0.05	1	0.017363102	1.226013537	1.760372691	black
CCNT2	0.00297536	0.39436669	0.89	0.729	1	0.017372624	0.694138445	1.760134571	black
2-Mar	0.002978515	0.436990197	0.451	0.221	1	0.017380225	0.769078535	1.759944594	black
PA2G4	0.00299047	0.961401855	0.132	0.029	1	0.01743914	1.690601071	1.758474942	black
GOT1	0.00300641	0.531467484	0.407	0.193	1	0.017515401	0.933565104	1.756579906	black
CNOT8	0.003007646	0.441949214	0.308	0.121	1	0.017515401	0.776319109	1.756579906	black
PCSK2OS1	0.003009646	0.55634361	0.176	0.05	1	0.017515401	0.977262007	1.756579906	black
ACOT13	0.003011014	0.652278601	0.264	0.1	1	0.017515401	1.145779483	1.756579906	black
MRPS14	0.003019697	0.882063936	0.22	0.079	1	0.01755503	1.548550045	1.755598413	black
UBQLN1	0.003021931	0.786610386	0.297	0.129	1	0.01755714	1.380930893	1.755546224	black
STMN2	0.003048124	0.389407822	0.868	0.657	1	0.017698359	0.682268598	1.75206701	black
LMO7	0.003051698	0.439220047	0.352	0.164	1	0.01770815	0.76943745	1.751826802	black
SNTG1	0.003053615	-0.402924351	0.967	0.921	1	0.017708327	0.705851934	1.751822476	black
COPB1	0.003056074	0.542915526	0.56	0.314	1	0.01771164	0.951047511	1.751741228	black
GM15614	0.003061512	0.742539938	0.198	0.064	1	0.017732202	1.300363664	1.751237338	black
PAFAH1B3	0.003080785	0.924250388	0.132	0.029	1	0.01783282	1.616310561	1.748779966	black
PFN1	0.003108236	0.596725024	0.297	0.121	1	0.017980628	1.041401609	1.745195135	black
EIF2B3	0.003114505	0.600329707	0.407	0.2	1	0.018005789	1.047327904	1.744587834	black
LMO4	0.003116988	0.545383545	0.341	0.157	1	0.018009049	0.951426628	1.744509228	black
KCNIP2	0.003126869	0.656311808	0.132	0.029	1	0.01805502	1.144215328	1.743402015	black
NFXL1	0.00314884	-1.295763819	0.088	0.236	1	0.018170703	2.255443135	1.74062827	black
CADM4	0.003153404	0.183760831	0.319	0.129	1	0.01818586	0.319792756	1.740266162	black
SMARCD1	0.003161472	0.598312596	0.352	0.157	1	0.018221185	1.040718925	1.73942339	black
FARSA	0.003168001	0.482948944	0.319	0.136	1	0.018247608	0.839748751	1.738794051	black
TMEM33	0.003171786	0.430200971	0.275	0.107	1	0.018258203	0.747922441	1.738541963	black
LINGO1	0.003174546	0.48774194	0.451	0.221	1	0.018262883	0.847905548	1.73843067	black
RELL1	0.003178535	0.697272012	0.187	0.057	1	0.018274628	1.211964366	1.738151461	black
DISP2	0.003194021	0.427834486	0.714	0.414	1	0.018349336	0.742883096	1.736379649	black
CTNNBIP1	0.00319544	0.763550835	0.275	0.114	1	0.018349336	1.325814132	1.736379649	black
SRPR	0.003213253	0.278742948	0.473	0.229	1	0.01844034	0.483404679	1.734231065	black
CAV2	0.003220927	0.996419934	0.132	0.029	1	0.018470589	1.727313131	1.733519244	black
CACNG7	0.003224826	0.43495741	0.363	0.164	1	0.018470589	0.754007041	1.733519244	black
NEFL	0.003226215	0.777562754	0.22	0.079	1	0.018470589	1.347919997	1.733519244	black
SNF8	0.003226398	0.517367569	0.33	0.143	1	0.018470589	0.896866636	1.733519244	black
NFAT5	0.003231527	-0.541568576	0.78	0.793	1	0.018488672	0.938589406	1.733094289	black
HIVEP3	0.003244218	0.344896469	0.813	0.486	1	0.018538763	0.59733283	1.731919241	black
ACTN1	0.003244234	0.501308732	0.473	0.243	1	0.018538763	0.868226239	1.731919241	black
HS2ST1	0.003251012	0.45370259	0.681	0.386	1	0.018566186	0.785485001	1.731277313	black
CALCRL	0.003268917	0.898871548	0.132	0.029	1	0.018635812	1.554734688	1.729651685	black
PLS1	0.003268917	0.707963317	0.132	0.029	1	0.018635812	1.224529943	1.729651685	black
TRPC5	0.003270386	0.703047948	0.286	0.121	1	0.018635812	1.216028067	1.729651685	black
PDE8B	0.003271148	0.469829606	0.495	0.264	1	0.018635812	0.81264157	1.729651685	black
TNFAIP8	0.003277088	-1.510240772	0.066	0.193	1	0.018658323	2.611398696	1.729127398	black
ATXN10	0.003279692	0.43430698	0.824	0.571	1	0.018661825	0.750936701	1.729045895	black
SLC38A2	0.003284711	0.427726389	0.67	0.4	1	0.018668416	0.739492955	1.728892523	black
SDR39U1	0.003286317	0.560130434	0.176	0.05	1	0.018668416	0.968405319	1.728892523	black
KLHL26	0.003289771	0.792457721	0.242	0.093	1	0.018668416	1.370074229	1.728892523	black
EIF3C	0.003289887	0.712543007	0.297	0.129	1	0.018668416	1.231910277	1.728892523	black
RRAGA	0.003290798	0.540348463	0.297	0.121	1	0.018668416	0.934204417	1.728892523	black
TRA2A	0.003307931	0.360100162	0.945	0.714	1	0.018754271	0.621856901	1.726899808	black
MAP3K14	0.003317557	0.556697516	0.132	0.029	1	0.018797486	0.960804367	1.725900222	black
TMEM80	0.003320165	0.293199354	0.418	0.186	1	0.018800909	0.506009647	1.725821154	black
X4930578M01RIK	0.003322469	0.757428209	0.198	0.064	1	0.018802612	1.307155834	1.72578182	black
SMIM8	0.00332768	0.430255832	0.176	0.05	1	0.018820748	0.742347548	1.725363125	black
THSD7B	0.003336634	0.577328415	0.527	0.321	1	0.018860022	0.995578495	1.72445781	black
NRXN2	0.003354198	0.33334652	0.934	0.714	1	0.018947889	0.574169101	1.722439165	black
TCEAL8	0.003366856	0.620244139	0.132	0.029	1	0.019007945	1.067480369	1.721064824	black
SLIT3	0.003371072	0.70122907	0.209	0.071	1	0.019018297	1.206694882	1.720828377	black
REPS2	0.003372743	0.513715877	0.549	0.321	1	0.019018297	0.884016859	1.720828377	black
TRAPPC6B	0.003378105	0.524579571	0.319	0.136	1	0.019037091	0.902486388	1.720399419	black
ATP5G3	0.003386098	0.531370536	0.363	0.171	1	0.019061431	0.913874698	1.719844509	black
CDH4	0.003386487	0.548827838	0.582	0.336	1	0.019061431	0.943898544	1.719844509	black
FNBP4	0.003397363	0.496076253	0.473	0.236	1	0.019111183	0.852612426	1.718712439	black
ARRDC1	0.003403768	0.501158258	0.253	0.093	1	0.019135741	0.861067419	1.718154706	black
CINP	0.003406859	0.841866396	0.143	0.036	1	0.01914165	1.44634383	1.718020622	black
NUMA1	0.003420232	0.641959525	0.484	0.264	1	0.019204012	1.101992873	1.716608027	black
NUDT13	0.003422468	0.808501556	0.253	0.1	1	0.019204012	1.387880261	1.716608027	black
IFITM7	0.003424098	0.479539547	0.308	0.129	1	0.019204012	0.823181436	1.716608027	black
SLC30A9	0.00344218	0.314210904	0.571	0.3	1	0.01929389	0.538739792	1.714580192	black
TARSL2	0.003447845	0.765533419	0.209	0.071	1	0.019314108	1.312220227	1.714125335	black
TOMM22	0.003450995	0.405513405	0.352	0.157	1	0.019320218	0.6950451	1.713987975	black
GM49179	0.00345467	0.935935667	0.143	0.036	1	0.019329257	1.603992356	1.71378484	black
PSMC3	0.003459355	0.302797514	0.374	0.164	1	0.019343935	0.518829966	1.713455171	black
DCUN1D5	0.003462138	0.221249192	0.626	0.321	1	0.01934797	0.379080532	1.71336459	black
SLC35D1	0.003503765	0.359231074	0.374	0.171	1	0.019549724	0.613875383	1.70885936	black
SPOUT1	0.003503785	0.600840583	0.319	0.136	1	0.019549724	1.026752054	1.70885936	black
DDX55	0.003504491	0.442623595	0.451	0.221	1	0.019549724	0.756381474	1.70885936	black
X9030622O22RIK	0.003511116	0.231317462	0.725	0.443	1	0.019568929	0.395190372	1.708432941	black
DDX23	0.003512104	0.775237811	0.231	0.086	1	0.019568929	1.324441814	1.708432941	black
SLC4A4	0.00351878	0.630085746	0.132	0.029	1	0.019594488	1.076102077	1.707866085	black
MXRA7	0.0035211	0.734958552	0.198	0.064	1	0.019595779	1.255189746	1.70783746	black
GSR	0.003537615	0.522902751	0.341	0.15	1	0.019676016	0.892104954	1.706062842	black
TSG101	0.003543578	0.476610237	0.319	0.143	1	0.019697509	0.812901028	1.705588688	black
MAN2C1OS	0.003549592	0.519495598	0.231	0.086	1	0.019719256	0.885796862	1.705109468	black
SEC23A	0.003557693	0.271436001	0.484	0.243	1	0.019752566	0.462629136	1.704376481	black
CEP19	0.003579617	0.696293839	0.22	0.079	1	0.019862537	1.185067945	1.701965288	black
ADGRL1	0.003585636	0.395576994	0.626	0.35	1	0.019884176	0.673071245	1.701492391	black
PXK	0.003598801	0.402140192	0.495	0.236	1	0.019945394	0.683701616	1.700157383	black
C1QL1	0.003601789	1.122171768	0.143	0.036	1	0.019950168	1.907751988	1.700053453	black
GMDS	0.003606595	-0.460590375	0.824	0.821	1	0.019965006	0.782879536	1.699730559	black
AKAP8L	0.003620906	-0.703064539	0.659	0.693	1	0.020032407	1.19399121	1.698266863	black
HMGCL	0.003641077	0.350794661	0.374	0.164	1	0.020132132	0.59498641	1.696110221	black
UROS	0.003645405	0.70001663	0.198	0.064	1	0.020144192	1.187123299	1.695850138	black
MINPP1	0.003673776	0.710389949	0.319	0.143	1	0.020286876	1.202537324	1.692784824	black
FKBP8	0.00367555	0.377349747	0.495	0.257	1	0.020286876	0.638771925	1.692784824	black
NRSN1	0.003686426	0.384368312	0.374	0.171	1	0.020330121	0.650297382	1.691860026	black
RTF2	0.003687719	0.579350847	0.198	0.064	1	0.020330121	0.98018054	1.691860026	black
RABAC1	0.003702377	0.427813203	0.835	0.593	1	0.02039046	0.723249435	1.690572966	black
T2	0.00370301	0.806509924	0.143	0.036	1	0.02039046	1.363463874	1.690572966	black
C1GALT1C1	0.003707081	1.044101625	0.154	0.043	1	0.020400904	1.764897784	1.690350577	black
PRDX6	0.003715239	0.628647138	0.297	0.129	1	0.020433813	1.062194007	1.689650589	black
DISC1	0.003754585	0.771594907	0.143	0.036	1	0.020638118	1.300391969	1.685329903	black
GAD2	0.003762618	0.934031184	0.33	0.157	1	0.020670167	1.573521247	1.684656009	black
GAD1	0.003773688	0.636242885	0.198	0.064	1	0.020718852	1.071200351	1.683634311	black
TENM1	0.003785765	-0.402663501	0.956	0.993	1	0.020773	0.677481659	1.682500789	black
UTP4	0.003805184	0.497007852	0.187	0.057	1	0.020863144	0.835281456	1.680620242	black
CDK14	0.003808423	-0.334441701	0.989	0.929	1	0.020863144	0.562069492	1.680620242	black
RPS8	0.003809418	0.460800384	0.802	0.514	1	0.020863144	0.774430453	1.680620242	black
PTPRG	0.003811087	0.429234195	0.934	0.729	1	0.020863144	0.721379677	1.680620242	black
AAMDC	0.0038134	0.734310813	0.209	0.071	1	0.020863635	1.234090107	1.680610016	black
COX6B1	0.003827654	0.559905626	0.56	0.314	1	0.020929414	0.940217559	1.679242922	black
TRIM32	0.003841375	0.577634286	0.22	0.079	1	0.020981283	0.969367345	1.678167948	black
11-Sep	0.003842394	0.561161884	0.418	0.214	1	0.020981283	0.941723888	1.678167948	black
PYGB	0.003843848	0.540110151	0.462	0.243	1	0.020981283	0.906395544	1.678167948	black
PLS3	0.003849171	0.311377254	0.484	0.25	1	0.020998122	0.522434843	1.677819546	black
HDX	0.003852645	-1.149283854	0.22	0.364	1	0.02100486	1.92813078	1.677680213	black
CGREF1	0.003862346	0.504846607	0.297	0.121	1	0.021045523	0.846547128	1.676840284	black
DHX29	0.003874512	0.38608507	0.286	0.114	1	0.021099564	0.646972993	1.675726524	black
ORAI2	0.003886762	0.401885712	0.253	0.093	1	0.021153993	0.673000886	1.674607645	black
MED21	0.003943245	0.524988071	0.187	0.057	1	0.021448965	0.875991762	1.668593653	black
FOXN3	0.003967796	0.287049108	0.835	0.614	1	0.021570004	0.478266805	1.666149769	black
ANKRD10	0.003971774	0.418021677	0.527	0.286	1	0.021579131	0.696409925	1.665966055	black
BASP1	0.003993313	0.26770594	0.747	0.45	1	0.021683598	0.445427522	1.663868652	black
TOX2	0.003996918	0.45993579	0.571	0.329	1	0.021690619	0.765208074	1.663728048	black
X9530077C05RIK	0.004003227	0.616652233	0.242	0.093	1	0.021712299	1.025674077	1.663294192	black
AKAP8	0.004010674	0.454521321	0.659	0.386	1	0.021730283	0.755839238	1.662934616	black
MEGF11	0.004011174	1.473258561	0.154	0.043	1	0.021730283	2.44993266	1.662934616	black
MOSMO	0.004013892	0.476177396	0.319	0.136	1	0.02173246	0.791831161	1.662891114	black
ZC3H4	0.004031379	0.602148979	0.209	0.071	1	0.021814547	1.000322281	1.661253801	black
RPS16	0.004042081	0.34637477	0.527	0.279	1	0.021859853	0.57510431	1.660352771	black
SBF2	0.00405375	-0.536167766	0.824	0.764	1	0.021902	0.889779108	1.659516226	black
GM9856	0.004054543	0.54586972	0.341	0.157	1	0.021902	0.905879658	1.659516226	black
STX7	0.004062	0.294145295	0.429	0.207	1	0.02192786	0.487988145	1.659003745	black
SYT2	0.004064004	1.039911984	0.154	0.043	1	0.02192786	1.725217876	1.659003745	black
PTPA	0.004077636	0.42001965	0.593	0.35	1	0.021988769	0.696308188	1.657799076	black
CHD3	0.004105253	0.509460446	0.527	0.293	1	0.022124979	0.843216713	1.655117132	black
GAS6	0.004115194	0.613969624	0.396	0.193	1	0.022153108	1.015852857	1.654565335	black
CNNM2	0.004115194	0.424028111	0.396	0.193	1	0.022153108	0.701582214	1.654565335	black
PFDN1	0.004120194	0.495182113	0.527	0.293	1	0.022167304	0.819173393	1.654287121	black
GM28960	0.004134274	0.673069753	0.143	0.036	1	0.02221758	1.112788409	1.65330325	black
TTC7	0.004134274	0.721611579	0.143	0.036	1	0.02221758	1.193042768	1.65330325	black
ELOVL5	0.004136839	0.482632151	0.33	0.15	1	0.022218638	0.79792732	1.653282563	black
BC031181	0.004180495	0.374296033	0.473	0.229	1	0.022440268	0.617203664	1.648971963	black
CREG2	0.004184764	0.687065088	0.253	0.1	1	0.02245034	1.13281717	1.64877708	black
EFNB3	0.004189101	0.121155228	0.319	0.129	1	0.022460762	0.199733543	1.648575516	black
X4933434E20RIK	0.004198398	0.412531256	0.44	0.221	1	0.022497756	0.679794088	1.647860805	black
CBL	0.004215914	0.299128491	0.571	0.307	1	0.022578722	0.492455429	1.646300649	black
TMC7	0.004228941	0.932852549	0.11	0.021	1	0.02263557	1.534736995	1.645208556	black
PRKCZ	0.004234139	0.437565153	0.681	0.436	1	0.022650469	0.719760895	1.644922795	black
GALNT18	0.004237009	0.39268457	0.352	0.164	1	0.022651684	0.645926657	1.644899512	black
TMEM165	0.004239194	0.517655312	0.396	0.2	1	0.022651684	0.85149097	1.644899512	black
BBIP1	0.004246061	0.368428342	0.571	0.307	1	0.022663727	0.605942552	1.644668672	black
PDCD2L	0.004246279	0.533284926	0.308	0.136	1	0.022663727	0.877077011	1.644668672	black
COQ7	0.004248981	0.33131682	0.143	0.036	1	0.02266526	0.54489666	1.644639291	black
ZFP592	0.00425505	0.539693063	0.352	0.164	1	0.022677565	0.887473201	1.644403574	black
TMEM120B	0.004256122	0.405998331	0.242	0.093	1	0.022677565	0.667625106	1.644403574	black
THOC7	0.004261873	0.41293189	0.484	0.25	1	0.022695321	0.678886318	1.644063666	black
ZFP516	0.004279927	0.62409355	0.198	0.064	1	0.022770357	1.025154892	1.642630167	black
GM40375	0.004281696	0.761953764	0.154	0.043	1	0.022770357	1.251608238	1.642630167	black
SREBF1	0.004283244	0.449637901	0.187	0.057	1	0.022770357	0.738588781	1.642630167	black
MIA3	0.004287978	0.438703066	0.527	0.293	1	0.022782612	0.720524372	1.642396481	black
GRIA1	0.004291742	0.42663935	0.868	0.664	1	0.022789707	0.700653274	1.642261253	black
CCDC90B	0.00430308	0.709901806	0.286	0.121	1	0.022836988	1.16520526	1.641361172	black
DNAJB9	0.004333767	0.948329459	0.264	0.114	1	0.022974716	1.554074765	1.638749857	black
ARL4A	0.004333928	0.454593031	0.187	0.057	1	0.022974716	0.744964264	1.638749857	black
NAAA	0.004337746	0.840338551	0.154	0.043	1	0.02298197	1.376989457	1.638612743	black
MT.ND3	0.004343587	0.608031613	0.242	0.093	1	0.022989673	0.996239858	1.638467207	black
ZFP692	0.0043441	0.39121343	0.604	0.35	1	0.022989673	0.640990375	1.638467207	black
INTS10	0.00435996	0.309134427	0.527	0.271	1	0.023060602	0.506093048	1.637129368	black
DLGAP1	0.004368546	-0.418302167	0.956	0.957	1	0.023092995	0.684559754	1.636519741	black
HK1	0.004372292	0.499399678	0.582	0.357	1	0.023099786	0.817213659	1.636392043	black
MAPK14	0.00438101	0.428142429	0.56	0.307	1	0.023132818	0.700343163	1.635771453	black
GCH1	0.004395969	0.870010141	0.352	0.186	1	0.023198748	1.422062411	1.634535444	black
PRMT9	0.004407838	0.388788942	0.308	0.129	1	0.023248311	0.635128956	1.63360859	black
STOML2	0.00442646	0.680033911	0.143	0.036	1	0.023328621	1.109890777	1.632110928	black
DPM1	0.004428037	0.383264113	0.56	0.307	1	0.023328621	0.625529548	1.632110928	black
SOX4	0.004465078	0.665862318	0.22	0.079	1	0.023510566	1.084514542	1.628736923	black
SLC35G2	0.00447021	0.456343715	0.352	0.157	1	0.023524385	0.743147398	1.628481719	black
DRG2	0.004477842	0.531002418	0.242	0.093	1	0.023539984	0.864574863	1.628193835	black
MAPRE2	0.004478192	0.511358315	0.56	0.329	1	0.023539984	0.832590455	1.628193835	black
TXNDC5	0.004486506	0.269166985	0.286	0.114	1	0.023570487	0.438104647	1.627631439	black
SYNDIG1L	0.004505695	1.088773652	0.176	0.057	1	0.023658049	1.770368908	1.626021078	black
X6330562C20RIK	0.00450991	0.664684951	0.154	0.043	1	0.023666937	1.080683309	1.625857946	black
MGAT4C	0.004519045	-0.633818318	0.824	0.893	1	0.023701619	1.030095466	1.625221985	black
RPL22L1	0.004539924	0.529091297	0.505	0.271	1	0.023788284	0.859052147	1.623636887	black
GM32618	0.004541926	-1.389055172	0.264	0.393	1	0.023788284	2.255321215	1.623636887	black
VEZF1	0.004543174	0.554804506	0.264	0.107	1	0.023788284	0.90080106	1.623636887	black
CLDND1	0.004550922	0.489423613	0.385	0.186	1	0.023813652	0.794419678	1.623173989	black
B230118H07RIK	0.004553095	0.70179256	0.374	0.186	1	0.023813652	1.13913143	1.623173989	black
MRPL18	0.004568659	0.915118043	0.154	0.043	1	0.023881742	1.484261069	1.621934002	black
GNB4	0.004585846	0.714053732	0.341	0.164	1	0.023958239	1.157156288	1.620545115	black
LAMTOR2	0.004645753	0.575327968	0.319	0.15	1	0.02425771	0.929241084	1.615150205	black
CETN3	0.004676423	0.599753805	0.297	0.129	1	0.024404268	0.967123535	1.612534221	black
MYO9B	0.004682786	0.318195188	0.44	0.214	1	0.024411636	0.513058911	1.612403113	black
DLAT	0.004683339	0.301115316	0.538	0.3	1	0.024411636	0.485519274	1.612403113	black
GM11817	0.004688241	0.835274326	0.154	0.043	1	0.024411636	1.346798924	1.612403113	black
RCE1	0.004688241	0.746602981	0.154	0.043	1	0.024411636	1.203824971	1.612403113	black
NRP2	0.00469473	0.450469428	0.275	0.114	1	0.024431864	0.726176265	1.612043394	black
X2310033P09RIK	0.004701847	0.591537879	0.275	0.121	1	0.024455336	0.953338042	1.611626364	black
REEP5	0.004707289	0.356639227	0.813	0.536	1	0.024460137	0.574738781	1.611541124	black
NDUFA1	0.004709177	0.550775899	0.22	0.079	1	0.024460137	0.887598012	1.611541124	black
CDK7	0.00471059	0.668587201	0.352	0.171	1	0.024460137	1.077455769	1.611541124	black
AIFM1	0.004714504	0.674814068	0.308	0.143	1	0.024466918	1.087409382	1.611420734	black
ALYREF2	0.004724462	0.811370778	0.11	0.021	1	0.024505047	1.306910987	1.610744462	black
UBA1	0.004729801	0.560180151	0.308	0.136	1	0.024519184	0.902166765	1.610493987	black
LAGE3	0.00473694	0.439762707	0.418	0.2	1	0.024524461	0.708194095	1.610400528	black
GPX1	0.004737238	0.615032587	0.143	0.036	1	0.024524461	0.990448802	1.610400528	black
SORCS2	0.00473866	0.743747572	0.297	0.136	1	0.024524461	1.197731482	1.610400528	black
WDR4	0.004746445	0.218695591	0.275	0.107	1	0.024551208	0.352083964	1.609927128	black
HDGF	0.004755778	0.674265133	0.418	0.229	1	0.024572394	1.085265154	1.609552533	black
CBX1	0.004755778	0.577887456	0.429	0.221	1	0.024572394	0.930140219	1.609552533	black
TUBG1	0.004759116	0.831593016	0.165	0.05	1	0.024576105	1.338438105	1.609486948	black
CCT4	0.004769807	0.444241284	0.352	0.164	1	0.024617766	0.714673767	1.608751353	black
ANAPC16	0.004785159	0.451938728	0.363	0.171	1	0.024683425	0.726534247	1.607594574	black
RPL29	0.004797521	-1.510717138	0.187	0.314	1	0.024716077	2.427753351	1.607020461	black
RAB8A	0.004799389	0.874090919	0.11	0.021	1	0.024716077	1.404681992	1.607020461	black
EPDR1	0.004799392	0.479783574	0.396	0.2	1	0.024716077	0.77102202	1.607020461	black
MT.ND4	0.004809319	0.578938996	0.692	0.443	1	0.024746893	0.930053526	1.606479324	black
DNAJC14	0.00481065	0.746850219	0.154	0.043	1	0.024746893	1.199799435	1.606479324	black
ULK4	0.004825282	0.733121435	0.341	0.164	1	0.024808562	1.17695199	1.605398416	black
DZIP1	0.004830646	-0.835876136	0.44	0.564	1	0.024822537	1.341709785	1.605153835	black
EMB	0.004836602	0.812109436	0.297	0.143	1	0.024839538	1.303319102	1.604856492	black
THAP2	0.004846443	0.440748266	0.527	0.293	1	0.024876461	0.707053393	1.604211402	black
YDJC	0.004859741	0.50926231	0.209	0.071	1	0.024929577	0.816492673	1.603285098	black
FLNB	0.0048682	0.331495588	0.736	0.457	1	0.024929577	0.531481936	1.603285098	black
MTIF3	0.004872933	0.56211555	0.154	0.043	1	0.024929577	0.901231484	1.603285098	black
LRRC75B	0.004872933	0.640364111	0.154	0.043	1	0.024929577	1.026686237	1.603285098	black
KLHDC1	0.004874945	0.36055918	0.374	0.171	1	0.024929577	0.57807916	1.603285098	black
DNTTIP2	0.004875389	0.794729123	0.11	0.021	1	0.024929577	1.27417736	1.603285098	black
ACAD12	0.004875389	0.795398206	0.11	0.021	1	0.024929577	1.27525009	1.603285098	black
FRRS1L	0.004895478	0.266989365	0.505	0.257	1	0.025010004	0.427686589	1.601886237	black
TOM1	0.004899928	0.719688757	0.418	0.236	1	0.025010004	1.152859515	1.601886237	black
P4HA1	0.004899928	0.342258889	0.44	0.221	1	0.025010004	0.548259804	1.601886237	black
ARSK	0.00490178	0.354295649	0.198	0.064	1	0.025010004	0.567541324	1.601886237	black
BCL7C	0.004923608	0.807844269	0.297	0.143	1	0.025095201	1.292881502	1.600409327	black
RPL32	0.004925408	0.637122692	0.571	0.314	1	0.025095201	1.019657099	1.600409327	black
PSMG2	0.004926501	0.283996466	0.286	0.114	1	0.025095201	0.454510592	1.600409327	black
DCTN3	0.004950497	0.564786705	0.253	0.1	1	0.025153054	0.9033251	1.599409285	black
LIFR	0.00495241	0.872982593	0.11	0.021	1	0.025153054	1.396256466	1.599409285	black
FKBP7	0.004952476	0.727913397	0.11	0.021	1	0.025153054	1.164231447	1.599409285	black
CITED2	0.004952476	0.868769344	0.11	0.021	1	0.025153054	1.389517756	1.599409285	black
CETN2	0.004952476	0.79741557	0.11	0.021	1	0.025153054	1.275393867	1.599409285	black
NDRG1	0.004954755	0.805088498	0.176	0.057	1	0.025153054	1.287666019	1.599409285	black
CSMD1	0.004956623	-0.293444331	1	0.971	1	0.025153054	0.469337588	1.599409285	black
MRPS27	0.004965293	0.475704023	0.22	0.079	1	0.02518343	0.760596085	1.598885121	black
CTNND2	0.004972245	-0.270730312	0.989	0.993	1	0.025205063	0.432765709	1.598512207	black
TMEM208	0.00499931	0.590426091	0.495	0.286	1	0.02532858	0.942549813	1.596389161	black
PNKD	0.005005904	0.562769794	0.385	0.193	1	0.025343576	0.89825494	1.596132112	black
SLC2A8	0.005008852	0.59922326	0.33	0.15	1	0.025343576	0.956439488	1.596132112	black
SMIM7	0.005010373	0.542844079	0.231	0.086	1	0.025343576	0.866450867	1.596132112	black
AGAP1	0.005016696	0.339906719	0.835	0.579	1	0.025361884	0.542429425	1.595818483	black
NAGA	0.005030664	0.837052407	0.11	0.021	1	0.025418804	1.334968755	1.594844891	black
PTPN1	0.005040898	0.512655629	0.429	0.214	1	0.025456807	0.817273593	1.594196078	black
LY6H	0.005047133	0.325027674	0.967	0.829	1	0.025464543	0.518114953	1.594064119	black
TSPAN2	0.005048453	0.402112921	0.253	0.1	1	0.025464543	0.640993779	1.594064119	black
SNRPD3	0.005050572	0.612943373	0.264	0.107	1	0.025464543	0.977071039	1.594064119	black
DLGAP2	0.005058425	0.570756139	0.703	0.514	1	0.025490441	0.909569911	1.593622652	black
TYMS	0.005109966	0.766185221	0.11	0.021	1	0.025736345	1.217815494	1.589453125	black
DPP10	0.005133737	-0.456021815	0.934	0.907	1	0.025842194	0.724012434	1.587670611	black
DBI	0.005148157	0.674345497	0.253	0.1	1	0.025900887	1.069974125	1.586685356	black
ARL2BP	0.005158908	0.417997601	0.385	0.186	1	0.025941067	0.662949281	1.586012165	black
LSM12	0.005166621	0.530622375	0.297	0.129	1	0.025965935	0.841352733	1.585596035	black
ANKS1	0.005171779	0.404548606	0.407	0.2	1	0.025977944	0.641369429	1.585395228	black
X4930430F08RIK	0.005186652	0.704579646	0.165	0.05	1	0.026001863	1.11675559	1.584995531	black
NDUFAB1	0.005186738	0.558107948	0.352	0.164	1	0.026001863	0.884598603	1.584995531	black
NANS	0.005190396	0.760653959	0.11	0.021	1	0.026001863	1.205633125	1.584995531	black
SORBS2OS	0.005190396	0.787346941	0.11	0.021	1	0.026001863	1.247941382	1.584995531	black
GM48512	0.005190396	0.742154883	0.11	0.021	1	0.026001863	1.176312173	1.584995531	black
TTLL4	0.005198673	0.398493325	0.253	0.1	1	0.026015547	0.631519086	1.584767038	black
WSB2	0.005198673	0.474685606	0.253	0.1	1	0.026015547	0.752266102	1.584767038	black
X2300009A05RIK	0.005216135	0.18034067	0.407	0.193	1	0.026089014	0.285577085	1.583542331	black
UBE2J1	0.005226711	0.559467566	0.286	0.121	1	0.026127984	0.885577907	1.582894097	black
WDR36	0.005230192	0.417605308	0.352	0.164	1	0.026131463	0.661000832	1.582836281	black
OCIAD1	0.00523872	0.302685681	0.681	0.45	1	0.026160142	0.478957683	1.582359896	black
X4931415C17RIK	0.005264267	1.019714406	0.121	0.029	1	0.026273734	1.611636388	1.580478199	black
PPP2R3A	0.005268287	0.292097145	0.67	0.393	1	0.026279818	0.461623799	1.580377649	black
TEX264	0.005277141	0.293635379	0.308	0.129	1	0.026309995	0.463908436	1.579879229	black
SLC22A3	0.005300939	-1.815449784	0.066	0.193	1	0.02641461	2.865062595	1.578155794	black
TMCC1	0.005309365	-0.453214586	0.912	0.871	1	0.026442552	0.715035129	1.57769664	black
DHDDS	0.005318911	0.33482551	0.593	0.343	1	0.026476042	0.52806903	1.577146945	black
TPP1	0.005323409	0.446177625	0.286	0.121	1	0.026484382	0.703626647	1.577010158	black
GM16894	0.005329733	0.483044262	0.154	0.043	1	0.026501792	0.761627852	1.576724767	black
SON	0.005332557	0.305411557	0.934	0.729	1	0.026501792	0.481549966	1.576724767	black
CAB39	0.005336864	0.485314161	0.429	0.221	1	0.026509156	0.765148298	1.576604105	black
KBTBD2	0.005347832	0.738746076	0.187	0.064	1	0.026549582	1.1642212	1.575942313	black
GPM6B	0.005362227	0.504413707	0.659	0.414	1	0.026592895	0.794569816	1.575234386	black
ZRANB2	0.005363457	0.353438455	0.857	0.7	1	0.026592895	0.556748407	1.575234386	black
COTL1	0.005365059	0.424673027	0.33	0.15	1	0.026592895	0.668959555	1.575234386	black
RNF157	0.005375884	0.303340646	0.637	0.379	1	0.02663248	0.47763666	1.574588395	black
ENPP5	0.005399589	0.574810887	0.374	0.186	1	0.026735801	0.904123953	1.572906801	black
UBL5	0.005404425	0.493300531	0.275	0.114	1	0.026745633	0.775836985	1.572747112	black
EFCAB5	0.005438597	0.649170461	0.11	0.021	1	0.026900558	1.01935259	1.570238715	black
CTIF	0.005458037	0.370962157	0.714	0.45	1	0.026982486	0.58200922	1.568918042	black
LRP12	0.005493682	0.508168543	0.231	0.086	1	0.027143321	0.795963203	1.566337024	black
KIF22	0.005497667	-1.755145958	0.066	0.186	1	0.027143321	2.749150095	1.566337024	black
X5330434G04RIK	0.005499249	0.271640132	0.967	0.893	1	0.027143321	0.425479996	1.566337024	black
THAP3	0.005504847	0.405660887	0.604	0.35	1	0.027156666	0.635315065	1.566123541	black
CFDP1	0.005509715	0.305176147	0.527	0.264	1	0.027166397	0.477896067	1.565967956	black
MTFR1L	0.005512965	0.687529747	0.165	0.05	1	0.027168149	1.0766303	1.565939954	black
CRELD1	0.005520063	0.616342665	0.341	0.164	1	0.027188844	0.964951786	1.565609265	black
SAMD15	0.005523682	0.619490488	0.11	0.021	1	0.027192395	0.969844909	1.565552544	black
NACC2	0.005532352	0.813766679	0.187	0.064	1	0.027220798	1.273625532	1.565099144	black
SUDS3	0.005559938	0.4889675	0.341	0.157	1	0.027342188	0.764337729	1.563166731	black
PRCP	0.005565012	0.326080957	0.253	0.1	1	0.027352806	0.509663923	1.562998119	black
FAM89B	0.005579323	0.968521316	0.121	0.029	1	0.027408789	1.512936978	1.562110149	black
SIK3	0.005603015	0.386889602	0.89	0.679	1	0.027501727	0.603795403	1.560640035	black
IPO9	0.005609239	0.468657062	0.495	0.286	1	0.027501727	0.731404974	1.560640035	black
PHLDA3	0.005609965	0.6774612	0.11	0.021	1	0.027501727	1.057273072	1.560640035	black
GM47352	0.005609965	0.493334667	0.11	0.021	1	0.027501727	0.769917832	1.560640035	black
KCNH5	0.005616207	0.739504033	0.297	0.136	1	0.027517946	1.153910256	1.560383994	black
RPL27	0.00562848	0.451260822	0.473	0.264	1	0.027563691	0.703814638	1.559662624	black
BCAP29	0.005636921	0.283476986	0.407	0.2	1	0.02759021	0.44201007	1.559244988	black
MIAT	0.005644644	-0.632587412	0.736	0.7	1	0.02759021	0.986358752	1.559244988	black
PSAP	0.005646081	0.426339034	0.901	0.779	1	0.02759021	0.664767002	1.559244988	black
PCOLCE2	0.005648598	0.627407034	0.165	0.05	1	0.02759021	0.978281274	1.559244988	black
GM50240	0.005648598	0.439048198	0.165	0.05	1	0.02759021	0.684583702	1.559244988	black
WSCD2	0.005661686	0.481199081	0.275	0.114	1	0.027639751	0.749932349	1.558465881	black
ZFP160	0.005670191	0.214622139	0.418	0.2	1	0.027654238	0.334432437	1.558238303	black
KIF1BP	0.005670548	0.299411861	0.319	0.136	1	0.027654238	0.466555029	1.558238303	black
ZW10	0.005673875	0.371809193	0.253	0.1	1	0.02765609	0.579356512	1.558209219	black
TPM1	0.005686658	0.564420356	0.385	0.193	1	0.027704004	0.879060692	1.557457456	black
SRPRB	0.005722599	0.731853575	0.187	0.064	1	0.027864632	1.137993297	1.554946694	black
CEP44	0.005734797	0.320729238	0.363	0.171	1	0.027909541	0.498492552	1.554247302	black
AGPAT5	0.005743003	0.390884669	0.418	0.207	1	0.027934993	0.607376703	1.553851432	black
ZFP62	0.005756751	0.480764036	0.253	0.1	1	0.027987353	0.7466449	1.553038171	black
PUS7	0.005765175	0.371906199	0.418	0.207	1	0.028013796	0.577431992	1.55262804	black
KCNK13	0.005771362	0.72476547	0.176	0.057	1	0.028017394	1.125250761	1.552572255	black
DMXL1	0.005771888	-0.836362055	0.582	0.593	1	0.028017394	1.298512521	1.552572255	black
ZFP771	0.005777215	0.390486118	0.396	0.2	1	0.028028751	0.606189186	1.552396253	black
TRP53BP1	0.005789655	-0.803907581	0.538	0.593	1	0.02807459	1.247412596	1.55168657	black
MACO1	0.005801918	0.38290725	0.725	0.486	1	0.028119523	0.593886102	1.550992054	black
SHISAL1	0.005814721	0.600703466	0.264	0.114	1	0.028167023	0.931245983	1.550259048	black
SPRED1	0.00582352	0.504696651	0.308	0.136	1	0.028181274	0.782299685	1.550039382	black
ABCB8	0.005825014	0.342641508	0.264	0.107	1	0.028181274	0.531107831	1.550039382	black
STARD3	0.005826673	0.808293996	0.121	0.029	1	0.028181274	1.252887526	1.550039382	black
RHBDL3	0.005831563	0.447843726	0.286	0.121	1	0.028189091	0.694121466	1.549918924	black
PRKAG2	0.005836875	0.517493768	0.473	0.264	1	0.028189091	0.802073385	1.549918924	black
GM37529	0.005837302	-1.651178823	0.077	0.2	1	0.028189091	2.559193305	1.549918924	black
IRS2	0.005842281	0.704710855	0.198	0.071	1	0.028198622	1.092141235	1.549772118	black
MED28	0.005857695	0.638051605	0.165	0.05	1	0.028243963	0.988389385	1.549074365	black
DDX39	0.005857695	0.334854383	0.165	0.05	1	0.028243963	0.51871434	1.549074365	black
SCP2	0.005880265	0.485926801	0.264	0.107	1	0.028338225	0.752033611	1.547627356	black
SLC17A6	0.005909298	0.636424526	0.374	0.193	1	0.028463525	0.983728595	1.545711321	black
ACAD10	0.005938294	0.535774864	0.286	0.121	1	0.028588514	0.827133744	1.543808417	black
YPEL4	0.005942356	0.357266519	0.33	0.15	1	0.028593397	0.551524559	1.543734239	black
MARK3	0.00596059	0.305141011	0.769	0.486	1	0.028666434	0.470718556	1.542626327	black
OAZ2	0.005964053	0.583842965	0.385	0.2	1	0.028668397	0.900634171	1.542596597	black
ATP6V0E2	0.005988633	0.160031204	0.604	0.329	1	0.028771808	0.246613342	1.541032848	black
CHST11	0.005992374	0.569105783	0.374	0.186	1	0.028775049	0.876982869	1.540983935	black
SLC35E3	0.006000943	0.629433142	0.165	0.05	1	0.028801457	0.969695597	1.540585541	black
ARVCF	0.006012087	0.334695563	0.253	0.1	1	0.028840191	0.515431791	1.540001864	black
UBXN2B	0.006018682	0.561336565	0.231	0.086	1	0.028857074	0.864316693	1.539747714	black
CFAP36	0.006026196	0.412907345	0.549	0.321	1	0.028864148	0.635729185	1.53964126	black
NSD1	0.00602631	-0.510090101	0.901	0.85	1	0.028864148	0.785355766	1.53964126	black
RNF220	0.006060958	0.753385815	0.407	0.221	1	0.02901529	1.158235078	1.53737309	black
ABHD12	0.006068094	0.277909136	0.571	0.293	1	0.02903464	0.427169561	1.537083552	black
GAA	0.006082765	0.344581548	0.857	0.607	1	0.029080169	0.529416151	1.536403076	black
PRMT1	0.006083808	0.809104723	0.297	0.143	1	0.029080169	1.243110985	1.536403076	black
YWHAE	0.00608707	0.271764024	0.824	0.493	1	0.029080947	0.417535924	1.536391456	black
CACNB4	0.00610362	-0.532167444	0.769	0.793	1	0.029145172	0.817107654	1.535433373	black
PTPRA	0.006123654	0.428055853	0.692	0.429	1	0.029214918	0.6568069	1.534395324	black
PRPSAP1	0.006124453	0.44105587	0.275	0.114	1	0.029214918	0.676754064	1.534395324	black
LYNX1	0.006146987	0.469517468	0.341	0.157	1	0.029294306	0.719872062	1.533216785	black
MRPS34	0.00614734	0.456552479	0.165	0.05	1	0.029294306	0.699993924	1.533216785	black
SMG7	0.006155307	0.479396087	0.505	0.286	1	0.029317384	0.734854175	1.532874787	black
NDUFV2	0.006183748	0.137874649	0.451	0.229	1	0.029437905	0.211098925	1.531093108	black
ELOVL4	0.006198991	0.318058366	0.33	0.15	1	0.029495505	0.486706959	1.530244169	black
BORA	0.006221737	0.499679217	0.165	0.05	1	0.02957875	0.76401961	1.529020187	black
SSH2	0.006222791	-0.370770742	0.956	0.857	1	0.02957875	0.56691595	1.529020187	black
SLC25A17	0.006248393	0.364951974	0.22	0.079	1	0.029685401	0.557448477	1.527457081	black
TNS3	0.006260963	0.838049089	0.121	0.029	1	0.029730068	1.27953678	1.526804094	black
ADD2	0.006278087	0.478017131	0.538	0.307	1	0.029796303	0.729376521	1.525837617	black
ACSL3	0.006285459	0.574259837	0.495	0.3	1	0.02981621	0.876060694	1.525547562	black
CUEDC1	0.006310347	0.37571352	0.582	0.329	1	0.029919145	0.572606497	1.524050816	black
POR	0.006321286	0.397556928	0.44	0.229	1	0.029955874	0.605685138	1.523518007	black
CCNQ	0.00635124	0.715247057	0.121	0.029	1	0.03006745	1.088536926	1.521903397	black
X2310026I22RIK	0.00635124	0.794455395	0.121	0.029	1	0.03006745	1.209084365	1.521903397	black
MBNL1	0.006366736	-0.780088851	0.429	0.536	1	0.03011369	1.186699268	1.521236031	black
MTERF2	0.006368356	0.408373397	0.253	0.1	1	0.03011369	0.621232325	1.521236031	black
PPP1R7	0.006370636	0.503155686	0.198	0.071	1	0.03011369	0.765418558	1.521236031	black
SBK1	0.006405814	0.60077043	0.176	0.057	1	0.030264729	0.912608257	1.519063211	black
CLUAP1	0.006409795	0.412277303	0.297	0.136	1	0.030268299	0.626254162	1.519011978	black
MCTS1	0.006416086	0.422980076	0.451	0.221	1	0.030282764	0.642424039	1.518804491	black
MSMO1	0.006420204	0.170369189	0.516	0.271	1	0.030286968	0.258747218	1.518744206	black
GM13112	0.006442687	0.836430786	0.121	0.029	1	0.030377756	1.269237137	1.51744431	black
COL25A1	0.006446974	-0.949418668	0.462	0.593	1	0.030382701	1.440622843	1.517373621	black
ZFP942	0.00645931	0.364653632	0.264	0.107	1	0.030425554	0.55309259	1.516761502	black
X2900060N12RIK	0.006471685	0.474223379	0.187	0.064	1	0.03046855	0.718992932	1.516148218	black
ANK1	0.006479094	0.42204134	0.659	0.429	1	0.030488133	0.639759457	1.515869171	black
HUNK	0.006488401	0.703690535	0.231	0.093	1	0.030516624	1.066417333	1.515463517	black
PCYT1A	0.006497908	0.573522267	0.319	0.15	1	0.030542022	0.868944858	1.515102216	black
ETV6	0.006500311	0.417589369	0.462	0.25	1	0.030542022	0.632690579	1.515102216	black
BFAR	0.00651292	0.37420591	0.418	0.2	1	0.030585952	0.566726618	1.514478	black
IQSEC3	0.006516725	0.365436166	0.604	0.343	1	0.030588508	0.553431769	1.514441702	black
[truncated: 7,384 more rows]
