# Supplementary material for: Single-Cell Analyses Reveal Necroptosis's Potential Role in Neuron Degeneration and Show Enhanced Neuron-Immune Cell Interaction in Parkinson's Disease Progression
Source: Parkinsons Dis. 2023 Dec 19;2023:5057778. doi: 10.1155/2023/5057778 (PMC10751163; doi:10.1155/2023/5057778)
Supplement: Supplementary Materials — Figure S1: DA and GABA subclusters distribution. A: Heatmap showing DEGs expression of DA and GABA in single cells. B: KEGG enrichment of DEGs. C: PCA of two DA subclusters between PD and control samples. D: PCA of two GABA subclusters between PD and normal samples. Table S1: Detailed information of the patient samples and control samples were listed. Dataset column shows the sources of the samples. The sample name column shows the name of each sample appeared in the dataset. The brain position where samples came from includes Midbrain and substantia nigra. The patients and control samples' gender and ages were also provided. Table S2: Differential expression genes between Control and Parkinson's disease patients in cell subtypes (GABA, DA and GLU respectively) with statistical test. [file 5057778.f1.zip › Table S2-GABA DEGs (1).txt]

	p_val	avg_log2FC	pct.1	pct.2	p_val_adj	BH	PFC	log_padj	color
PTGDS	0	2.970599613	0.875	0.127	0	0	456.5928192	235.1248573	red
SNHG11	0	1.118375499	0.999	1	0	0	456.5928192	235.1248573	red
MALAT1	0	1.805655881	1	1	0	0	456.5928192	235.1248573	red
UBB	3.54E-239	1.833724483	0.906	0.304	8.01E-235	7.50E-236	431.1542074	235.1248573	red
PLP1	7.93E-231	2.012560212	0.83	0.218	1.79E-226	1.34E-227	456.5928192	226.8716317	red
RTN1	9.51E-220	1.168104404	0.995	0.869	2.15E-215	1.34E-216	252.1610873	215.8720457	red
SLC25A4	3.98E-199	1.662428938	0.849	0.29	8.99E-195	4.82E-196	324.7011967	195.3173391	red
HSP90AA1	4.80E-196	1.539082927	0.908	0.363	1.08E-191	5.08E-193	295.9567277	192.2942049	red
PPIA	2.32E-191	1.688102325	0.826	0.252	5.25E-187	2.19E-188	316.7900707	187.660467	red
HSP90AB1	1.28E-188	1.635559943	0.837	0.28	2.90E-184	1.09E-185	302.5191707	184.9636706	red
AC149090.1	4.12E-175	-1.58746148	0.641	0.844	9.31E-171	3.17E-172	272.2472805	171.4985113	blue
FTH1	5.71E-168	1.34390265	0.903	0.395	1.29E-163	4.03E-165	220.9305543	164.3947605	red
ITM2B	1.12E-165	1.336312569	0.915	0.442	2.54E-161	7.33E-163	216.6630309	162.1349944	red
APOD	1.55E-165	2.393838355	0.43	0.029	3.50E-161	9.36E-163	387.8708686	162.028847	red
SNHG14	7.93E-162	-0.771199977	0.985	0.988	1.79E-157	4.48E-159	122.1184916	158.3486713	black
STMN1	2.27E-160	1.699137692	0.677	0.17	5.13E-156	1.20E-157	266.6288907	156.9201201	red
SCG5	3.37E-158	1.104579632	0.966	0.63	7.62E-154	1.68E-155	170.961178	154.7748782	red
FGF14	2.34E-156	-0.623522968	0.999	0.998	5.28E-152	1.10E-153	95.3732349	152.9586556	black
MEG3	1.56E-154	0.464751362	1	1	3.52E-150	6.95E-152	70.25079453	151.1578023	black
PRELID3A	5.37E-151	1.646329267	0.62	0.14	1.21E-146	2.28E-148	243.0689237	147.6429585	red
CALM1	9.99E-143	1.160431857	0.931	0.494	2.26E-138	4.03E-140	161.757798	139.3944824	red
TUBA1A	1.50E-140	1.439542249	0.69	0.199	3.39E-136	5.78E-138	197.5597614	137.2379043	red
CAR2	7.42E-129	2.224059358	0.358	0.029	1.68E-124	2.73E-126	279.2604332	125.5633903	red
NRXN3	1.00E-128	-0.444307023	0.999	0.998	2.27E-124	3.54E-126	55.73890607	125.451328	black
NRXN1	1.86E-125	-0.556966724	1	0.996	4.21E-121	6.31E-123	68.06115755	122.1996839	black
SCG2	6.12E-124	1.43523326	0.77	0.319	1.38E-119	2.00E-121	173.2326467	120.6999946	red
CD81	3.83E-123	1.288803644	0.727	0.257	8.65E-119	1.20E-120	154.5539039	119.920443	red
NDUFA4	5.24E-122	1.230349772	0.74	0.26	1.19E-117	1.59E-119	146.1648801	118.7994532	red
MDH1	1.25E-120	1.164955539	0.798	0.33	2.83E-116	3.66E-118	136.8079173	117.4361706	red
CCSER1	9.84E-119	-0.712986704	0.992	0.986	2.22E-114	2.78E-116	82.38988642	115.5559928	black
IL1RAPL1	2.32E-116	-0.723401098	0.98	0.976	5.25E-112	6.35E-114	81.88711474	113.197388	black
RNPC3	3.03E-114	1.101557576	0.783	0.312	6.86E-110	8.03E-112	122.3778052	111.0952417	red
COX5A	2.19E-113	1.370538972	0.597	0.172	4.95E-109	5.62E-111	151.1021009	110.2501308	red
RNF121	1.68E-110	1.479846013	0.542	0.145	3.79E-106	4.18E-108	158.9041463	107.3788387	red
CHCHD2	1.05E-107	1.23803421	0.625	0.193	2.38E-103	2.54E-105	129.4916595	104.594573	red
ATP5A1	2.52E-107	1.185020176	0.686	0.243	5.70E-103	5.94E-105	123.5104317	104.2264378	red
HSPA8	7.89E-107	1.108997149	0.773	0.32	1.78E-102	1.81E-104	115.0510353	103.7433102	red
PSMA1	3.70E-106	1.130678163	0.671	0.23	8.37E-102	8.25E-104	116.5540307	103.0832951	red
CDR1OS	2.27E-105	-0.999929771	0.869	0.872	5.12E-101	4.92E-103	102.3007995	102.3079845	black
PEBP1	6.26E-105	1.23272154	0.555	0.152	1.42E-100	1.33E-102	125.5861867	101.8771739	red
UBC	1.89E-104	1.312008355	0.547	0.15	4.28E-100	3.92E-102	133.0470893	101.4071967	red
TSPAN3	6.70E-104	1.131385054	0.745	0.295	1.52E-99	1.35E-101	114.1217048	100.8690228	red
CNP	2.07E-103	1.854867991	0.322	0.034	4.68E-99	4.08E-101	186.2090477	100.38938	red
GM48677	2.29E-103	2.213752131	0.243	0.004	5.18E-99	4.39E-101	222.1659138	100.3571767	red
CALM2	2.33E-103	0.93898599	0.903	0.501	5.28E-99	4.39E-101	94.23398297	100.3571767	black
ATPIF1	1.17E-102	1.047214801	0.758	0.304	2.64E-98	2.15E-100	104.3735253	99.66773304	red
APLP1	3.00E-102	0.996298292	0.855	0.449	6.78E-98	5.41E-100	98.89966902	99.26712697	black
4-Sep	7.90E-101	1.211997212	0.58	0.177	1.78E-96	1.39E-98	118.60096	97.85580268	red
APOE	4.44E-100	1.272580773	0.533	0.144	1.00E-95	7.67E-98	123.5867083	97.11502088	red
CTSL	1.96E-99	1.39385419	0.478	0.117	4.42E-95	3.32E-97	134.4782645	96.47943488	red
X6030458C11RIK	4.56E-99	1.449733499	0.414	0.081	1.03E-94	7.57E-97	139.3496188	96.12085182	red
TRIM35	7.63E-99	1.134405937	0.587	0.182	1.72E-94	1.24E-96	108.7959202	95.9056337	red
NDFIP1	3.28E-98	0.83155798	0.952	0.644	7.42E-94	5.25E-96	79.23068035	95.27980276	black
GLUL	1.03E-97	1.495956386	0.379	0.065	2.32E-93	1.61E-95	141.8064658	94.79318193	red
ATP1B1	1.66E-97	0.74416005	0.974	0.773	3.74E-93	2.55E-95	70.39276196	94.59357835	black
BSG	5.22E-96	0.963116178	0.854	0.433	1.18E-91	7.90E-94	89.66840088	93.10237225	black
LUC7L2	5.95E-96	-0.776859025	0.93	0.916	1.35E-91	8.85E-94	72.28916237	93.05312816	black
EEF1A1	2.44E-95	1.007212055	0.734	0.293	5.51E-91	3.56E-93	93.11537393	92.44862931	red
COX4I1	2.59E-95	0.934869535	0.824	0.388	5.86E-91	3.72E-93	86.40918577	92.42913858	black
ZFP933	2.82E-95	1.961764456	0.26	0.017	6.37E-91	3.98E-93	181.2680606	92.40052245	red
TRF	8.98E-95	1.728788022	0.334	0.047	2.03E-90	1.25E-92	158.8828525	91.90418401	red
NAP1L5	2.87E-94	0.8844215	0.886	0.456	6.49E-90	3.92E-92	80.84177969	91.40639357	black
SNX21	2.23E-93	1.404768501	0.432	0.099	5.04E-89	3.00E-91	127.1636005	90.52281599	red
BTAF1	2.21E-92	0.93611804	0.742	0.311	4.99E-88	2.92E-90	83.81494613	89.53459129	black
HAGH	4.46E-92	1.078564042	0.532	0.15	1.01E-87	5.82E-90	96.2461384	89.2354414	red
LDHB	4.61E-92	1.030874452	0.683	0.264	1.04E-87	5.92E-90	91.98244718	89.22759411	red
CLDN11	4.78E-92	1.873732798	0.273	0.024	1.08E-87	6.05E-90	167.1716612	89.21851686	red
ATP6V0C	5.06E-91	0.701890147	0.971	0.739	1.14E-86	6.30E-89	61.90695038	88.2003411	black
CST3	7.06E-91	0.911229473	0.815	0.383	1.60E-86	8.67E-89	80.24451906	88.06181257	black
ATP5J	6.47E-90	1.108637109	0.584	0.192	1.46E-85	7.83E-88	96.56949102	87.10649339	red
ZRSR1	2.29E-89	1.754938999	0.261	0.022	5.18E-85	2.73E-87	151.9136339	86.56348396	red
MAL	9.90E-89	2.066762231	0.236	0.012	2.24E-84	1.16E-86	177.6046312	85.93375111	red
NRG3	2.31E-88	-0.542753644	0.986	0.993	5.22E-84	2.68E-86	46.44425187	85.57151557	black
COX8A	4.97E-88	0.951565339	0.756	0.325	1.12E-83	5.69E-86	81.11591531	85.24471416	black
AW209491	5.88E-88	1.76384429	0.271	0.027	1.33E-83	6.64E-86	150.240104	85.17764565	red
PSMD7	1.44E-86	1.058711895	0.535	0.163	3.26E-82	1.61E-84	88.7140604	83.79433615	red
ACP1	2.05E-86	1.133585	0.598	0.217	4.64E-82	2.26E-84	94.82040167	83.64648583	red
COX6A1	3.69E-86	0.982529417	0.609	0.21	8.35E-82	4.01E-84	81.93985879	83.39685041	black
OSBPL9	1.26E-85	0.762533329	0.92	0.596	2.84E-81	1.35E-83	63.19186057	82.87094898	black
SNHG9	1.03E-84	-2.409246415	0.147	0.427	2.33E-80	1.09E-82	197.4663079	81.96185605	blue
EIF1	2.03E-84	0.968093529	0.663	0.255	4.58E-80	2.12E-82	79.06762651	81.67354097	black
JKAMP	8.72E-84	1.015523445	0.547	0.176	1.97E-79	9.00E-82	82.30366057	81.04555434	red
EIF2S3Y	5.80E-83	0.862831878	0.829	0.429	1.31E-78	5.92E-81	69.22309886	80.22779483	black
MAPK8IP1	8.86E-83	1.130806813	0.465	0.127	2.00E-78	8.94E-81	90.51957	80.04865993	red
CNTNAP2	1.01E-82	-0.629127295	0.999	0.998	2.28E-78	1.01E-80	50.32816482	79.99679121	black
RPL23A	1.21E-82	1.003367252	0.588	0.2	2.73E-78	1.19E-80	80.19436517	79.92523675	red
SLC25A27	1.23E-82	1.002158116	0.617	0.221	2.78E-78	1.20E-80	80.09418878	79.9217085	red
ANKRD24	1.62E-82	1.015379426	0.646	0.256	3.67E-78	1.56E-80	81.03388798	79.80650966	red
COX7B	3.78E-82	0.894569987	0.778	0.353	8.55E-78	3.60E-80	71.06796291	79.44371482	black
GM15478	9.11E-82	1.461598215	0.325	0.057	2.06E-77	8.58E-80	115.5636215	79.06661376	red
RPS23	9.58E-82	1.008391184	0.62	0.227	2.17E-77	8.92E-80	79.71299366	79.04967328	red
RPS13	1.10E-81	0.958477562	0.598	0.21	2.48E-77	1.01E-79	75.71566553	78.99576218	black
GAPDH	1.47E-81	0.881969358	0.737	0.316	3.33E-77	1.34E-79	69.5631608	78.87253697	black
CRYAB	6.59E-81	1.953962837	0.227	0.016	1.49E-76	5.94E-79	152.8508039	78.22605477	red
PCP4	2.40E-80	1.025462078	0.628	0.244	5.44E-76	2.14E-78	79.64625856	77.66865326	red
RPL6	3.66E-80	0.942675804	0.674	0.275	8.27E-76	3.23E-78	73.04892869	77.49104025	black
SNRNP70	7.81E-80	0.62942019	0.961	0.738	1.77E-75	6.82E-78	48.56982433	77.16597768	black
ATP6V1E1	1.21E-79	1.173891281	0.476	0.141	2.75E-75	1.05E-77	90.36468911	76.97875485	red
HINT1	1.29E-79	0.967570719	0.558	0.187	2.92E-75	1.10E-77	74.46145549	76.95711958	black
SPARCL1	3.86E-79	1.081131861	0.639	0.268	8.73E-75	3.27E-77	82.69074901	76.48535019	red
KCNA1	1.80E-78	1.375577032	0.425	0.12	4.08E-74	1.51E-76	104.2965321	75.82020466	red
UNC80	1.83E-78	-0.720834052	0.951	0.921	4.13E-74	1.52E-76	54.65286671	75.81893023	black
ACOT7	1.86E-78	1.006493658	0.567	0.199	4.20E-74	1.53E-76	76.30845199	75.81612797	red
GRIA2	1.85E-77	-0.59564172	0.987	0.977	4.18E-73	1.51E-75	44.56697147	74.82177616	black
COX7C	1.94E-77	0.915819457	0.612	0.223	4.39E-73	1.57E-75	68.50782943	74.80495081	black
CSMD3	3.52E-77	-0.58025765	0.979	0.978	7.95E-73	2.81E-75	43.25894188	74.55126514	black
CCNL2	3.58E-77	0.892556472	0.62	0.231	8.10E-73	2.84E-75	66.53760251	74.54721866	black
TPT1	5.27E-77	0.981672557	0.503	0.158	1.19E-72	4.13E-75	73.02035935	74.38362093	black
SNCB	6.08E-77	0.864446609	0.707	0.301	1.37E-72	4.72E-75	64.25060366	74.32570504	black
X5430405H02RIK	4.30E-76	1.449458365	0.3	0.052	9.72E-72	3.31E-74	106.5060786	73.47991578	red
NACA	5.28E-76	1.117361309	0.452	0.132	1.19E-71	4.03E-74	82.00811808	73.39444939	red
AHSA1	7.60E-76	1.250215399	0.323	0.062	1.72E-71	5.75E-74	91.56597504	73.24015933	red
VTI1B	2.71E-75	0.899348162	0.546	0.187	6.13E-71	2.03E-73	65.37503418	72.69157479	black
GM27241	2.85E-75	1.705758562	0.228	0.021	6.44E-71	2.12E-73	123.9644236	72.67407383	red
NME2	2.91E-75	1.204569891	0.359	0.079	6.58E-71	2.14E-73	87.53442003	72.66861036	red
MDGA2	3.48E-75	-0.525454739	0.996	0.991	7.87E-71	2.54E-73	38.14562514	72.59545367	black
IDE	3.51E-75	0.978999845	0.451	0.129	7.92E-71	2.54E-73	71.07093792	72.59545367	black
RAB3A	2.98E-74	0.923080548	0.593	0.221	6.73E-70	2.14E-72	66.15730597	71.67013334	black
ISCU	1.02E-73	1.138947461	0.433	0.125	2.30E-69	7.25E-72	81.02434371	71.13966752	red
RPL7	1.14E-73	1.084542755	0.412	0.112	2.58E-69	8.04E-72	77.1050008	71.09447781	red
PCYT2	1.63E-73	0.899441025	0.658	0.276	3.68E-69	1.14E-71	63.80926374	70.94324361	black
ALDOA	2.84E-73	0.90167103	0.689	0.294	6.43E-69	1.97E-71	63.75218007	70.70447866	black
TMSB4X	5.18E-73	0.945826924	0.645	0.261	1.17E-68	3.57E-71	66.63091848	70.44726343	black
NME7	6.95E-73	1.477215656	0.366	0.092	1.57E-68	4.75E-71	103.8831048	70.32358778	red
H3F3A	1.01E-72	1.167491757	0.394	0.103	2.28E-68	6.83E-71	81.91806895	70.16586497	red
FKBP3	1.38E-72	1.093780373	0.446	0.135	3.13E-68	9.31E-71	76.5985511	70.03101628	red
GNG3	1.58E-72	1.015417241	0.503	0.166	3.56E-68	1.05E-70	71.05705046	69.97818001	red
CLTA	2.47E-72	0.871660378	0.499	0.158	5.58E-68	1.63E-70	60.83052178	69.78695298	black
P2RY14	3.92E-72	1.23741214	0.365	0.09	8.86E-68	2.58E-70	86.11051235	69.58919309	red
NDUFB8	4.61E-71	0.914260661	0.489	0.159	1.04E-66	3.00E-69	62.64754926	68.52263468	black
TECR	4.71E-71	0.597352051	0.972	0.765	1.06E-66	3.05E-69	40.92830131	68.51621462	black
X9530059O14RIK	6.46E-71	1.123330573	0.679	0.353	1.46E-66	4.15E-69	76.81597367	68.38234044	red
RPL3	6.82E-71	0.804762977	0.677	0.284	1.54E-66	4.34E-69	55.01526965	68.36207832	black
PPT1	8.80E-71	0.830340857	0.674	0.284	1.99E-66	5.56E-69	56.67477533	68.25483157	black
TMEM59	1.52E-70	0.875117694	0.625	0.249	3.44E-66	9.54E-69	59.52581751	68.02035649	black
NTMT1	2.42E-70	1.198861281	0.32	0.066	5.46E-66	1.51E-68	81.30949428	67.82227064	red
ATE1	6.04E-70	1.103926303	0.383	0.1	1.37E-65	3.74E-68	74.43506858	67.42757045	red
DYNLL1	8.93E-70	1.151420595	0.374	0.095	2.02E-65	5.48E-68	77.44589255	67.26116667	red
MRI1	1.42E-69	1.357766532	0.271	0.044	3.20E-65	8.64E-68	91.05671124	67.06359972	red
MECR	1.83E-69	1.079293521	0.421	0.123	4.13E-65	1.11E-67	72.26559305	66.95638549	red
GRIK2	5.72E-69	-0.743529546	0.977	0.973	1.29E-64	3.44E-67	49.41795727	66.46401278	black
EMC3	8.98E-69	1.135185688	0.349	0.084	2.03E-64	5.36E-67	75.23012061	66.27120252	red
FTL1	9.67E-69	1.032178725	0.413	0.118	2.19E-64	5.73E-67	68.37327552	66.24170204	red
TIMM23	1.15E-68	0.955336264	0.445	0.134	2.61E-64	6.78E-67	63.2132587	66.16859534	black
SEC11C	1.68E-68	1.038681187	0.426	0.126	3.80E-64	9.81E-67	68.5615305	66.00825294	red
UBE4BOS1	3.75E-68	1.716253239	0.168	0.004	8.47E-64	2.18E-66	112.6933793	65.66244229	red
NDUFB2	1.00E-67	1.039455665	0.402	0.114	2.26E-63	5.76E-66	67.81356296	65.23949531	red
ATP5J2	4.96E-67	0.893844234	0.546	0.202	1.12E-62	2.84E-65	57.69443581	64.54640933	black
CAMK1	5.66E-67	0.977830996	0.4	0.112	1.28E-62	3.22E-65	63.06236098	64.49208628	black
SIRT3	6.18E-67	1.066750672	0.369	0.098	1.40E-62	3.49E-65	68.75999849	64.45742225	red
DBNDD2	7.45E-67	1.047978111	0.361	0.091	1.68E-62	4.18E-65	67.46753947	64.37876781	red
HSBP1	1.19E-66	1.049306942	0.388	0.108	2.68E-62	6.61E-65	67.34460315	64.1800797	red
CHCHD10	1.48E-66	0.904028634	0.5	0.171	3.35E-62	8.20E-65	57.93562438	64.08605016	black
BC005624	1.72E-66	1.159856163	0.327	0.075	3.88E-62	9.45E-65	74.25908046	64.02438751	red
GM5141	1.93E-66	1.376965339	0.249	0.038	4.37E-62	1.06E-64	88.09331199	63.9764194	red
ATP5H	2.81E-66	0.853086282	0.582	0.222	6.36E-62	1.53E-64	54.440347	63.81575717	black
PNN	6.08E-66	0.748042691	0.743	0.347	1.38E-61	3.28E-64	47.48857262	63.48377334	black
NDUFS4	1.15E-65	0.756172138	0.732	0.347	2.59E-61	6.14E-64	47.79900781	63.21180778	black
GABARAPL2	1.23E-65	0.940963111	0.447	0.141	2.79E-61	6.57E-64	59.45228988	63.18238107	black
LZTR1	5.14E-65	0.979556067	0.423	0.129	1.16E-60	2.72E-63	61.28620676	62.56528731	black
SEC62	9.71E-65	0.691499625	0.883	0.537	2.19E-60	5.11E-63	43.07465223	62.29164941	black
X6330403K07RIK	1.44E-64	0.866371859	0.558	0.211	3.27E-60	7.56E-63	53.82054773	62.12176347	black
MBP	6.76E-64	0.833260115	0.527	0.193	1.53E-59	3.51E-62	51.20743097	61.45431665	black
EMC4	9.09E-64	0.959681233	0.452	0.148	2.05E-59	4.69E-62	58.85573841	61.32842488	black
YWHAH	1.11E-63	0.906407378	0.536	0.205	2.50E-59	5.68E-62	55.51339872	61.24552829	black
GM42418	1.15E-63	0.70842929	0.607	0.242	2.61E-59	5.89E-62	43.37697389	61.22978606	black
X3110021N24RIK	1.29E-63	0.849359566	0.495	0.175	2.92E-59	6.56E-62	51.9663869	61.18302418	black
GM47283	1.48E-63	0.73372859	0.696	0.323	3.35E-59	7.48E-62	44.84990303	61.1260126	black
ATP6AP2	1.50E-63	0.841890441	0.61	0.254	3.39E-59	7.51E-62	51.46003555	61.12438514	black
SLC25A5	1.58E-63	1.227037589	0.298	0.064	3.56E-59	7.85E-62	74.97828741	61.10512675	red
UQCRQ	2.53E-63	0.90532622	0.473	0.163	5.71E-59	1.25E-61	55.13647515	60.90232881	black
RNASEK	2.80E-63	0.74523545	0.704	0.324	6.33E-59	1.38E-61	45.35552468	60.86066452	black
MFAP3	4.04E-63	1.036943524	0.347	0.089	9.13E-59	1.98E-61	62.94644725	60.70383369	red
SYNGR3	6.69E-63	0.809754436	0.598	0.243	1.51E-58	3.26E-61	48.97948913	60.48684264	black
PTMA	1.68E-62	0.920478528	0.515	0.192	3.79E-58	8.12E-61	55.31176509	60.09022852	black
BTBD9	1.94E-62	0.712422252	0.813	0.441	4.39E-58	9.35E-61	42.76596622	60.02895912	black
CTNNA2	2.30E-62	-0.572050198	0.995	0.984	5.19E-58	1.10E-60	34.29935512	59.95864565	black
ARGLU1	2.51E-62	-1.111487016	0.662	0.696	5.68E-58	1.20E-60	66.6027911	59.92223942	blue
STMN2	4.56E-62	0.706791064	0.727	0.351	1.03E-57	2.16E-60	42.17110876	59.66559412	black
MT1	4.62E-62	1.01669791	0.394	0.118	1.04E-57	2.17E-60	60.65878754	59.66254767	red
ACTG1	6.63E-62	0.848782502	0.535	0.204	1.50E-57	3.10E-60	50.50976486	59.50848982	black
CHGB	7.44E-62	0.809169278	0.68	0.316	1.68E-57	3.46E-60	48.11372902	59.4606473	black
RPL13	9.63E-62	0.711506485	0.723	0.342	2.18E-57	4.46E-60	42.2286188	59.35099637	black
CEP19	9.77E-62	1.265640723	0.266	0.052	2.21E-57	4.50E-60	75.11176854	59.34683292	red
GMCL1	1.03E-61	0.759770616	0.711	0.329	2.32E-57	4.71E-60	45.07501997	59.32714297	black
BLOC1S2	2.38E-61	1.068070865	0.334	0.084	5.39E-57	1.09E-59	62.97791864	58.96417619	red
PPP1R1A	2.79E-61	1.225711545	0.301	0.07	6.30E-57	1.26E-59	72.19320641	58.89901804	red
RPS6	3.36E-61	0.728329463	0.512	0.184	7.58E-57	1.51E-59	42.84064219	58.82041627	black
RPL35A	5.76E-61	0.738766669	0.579	0.233	1.30E-56	2.58E-59	43.2830329	58.58823183	black
CKB	9.14E-61	0.729409021	0.728	0.345	2.07E-56	4.08E-59	42.59007697	58.38984128	black
PRDX5	1.07E-60	0.818852951	0.432	0.14	2.43E-56	4.76E-59	47.75731748	58.32221452	black
NOVA1	1.61E-60	-1.442014452	0.479	0.603	3.63E-56	7.10E-59	83.85169663	58.14899879	blue
RPL19	2.49E-60	0.679101651	0.637	0.266	5.62E-56	1.09E-58	39.36198239	57.96184171	black
HSPA5	2.54E-60	0.732601036	0.61	0.257	5.75E-56	1.11E-58	42.45748906	57.95444858	black
MDH2	6.88E-60	0.896868299	0.446	0.15	1.55E-55	2.99E-58	51.59212861	57.5247544	black
NDUFB6	7.80E-60	1.250460569	0.257	0.049	1.76E-55	3.37E-58	71.86648405	57.47201137	red
ZFP740	9.26E-60	0.790887856	0.474	0.167	2.09E-55	3.98E-58	45.39693975	57.39997065	black
SUB1	2.10E-59	1.015671773	0.339	0.09	4.75E-55	8.98E-58	57.94051301	57.04649332	red
LRPAP1	2.62E-59	0.812689177	0.563	0.226	5.92E-55	1.11E-57	46.28536888	56.95334723	black
RAPGEF4OS1	2.63E-59	1.090082484	0.342	0.093	5.94E-55	1.11E-57	62.08384622	56.95334723	red
NDUFA6	3.53E-59	0.797409219	0.452	0.152	7.99E-55	1.49E-57	45.31428301	56.82688627	black
MRFAP1	3.78E-59	0.82850107	0.417	0.134	8.54E-55	1.58E-57	47.05905284	56.80023179	black
RPS9	5.25E-59	0.883538385	0.443	0.15	1.19E-54	2.19E-57	50.0603486	56.65894027	black
PRDX2	7.05E-59	0.920085473	0.417	0.136	1.59E-54	2.93E-57	52.01571008	56.53356302	black
RPS2	9.85E-59	0.709527775	0.578	0.232	2.23E-54	4.07E-57	40.0104533	56.39025662	black
ADGRB3	2.08E-58	-0.559004461	0.976	0.973	4.71E-54	8.57E-57	31.34163393	56.06687627	black
SMDT1	2.90E-58	1.00977998	0.331	0.088	6.55E-54	1.19E-56	56.47297296	55.92601762	red
TPI1	3.14E-58	0.823322516	0.471	0.167	7.09E-54	1.28E-56	46.01839825	55.89352573	black
NME1	4.05E-58	0.916879395	0.369	0.109	9.15E-54	1.64E-56	51.14813308	55.78501749	black
D030068K23RIK	4.34E-58	1.062178185	0.44	0.16	9.81E-54	1.75E-56	59.2238245	55.75695806	red
DNAJC3	6.89E-58	0.899673485	0.331	0.089	1.56E-53	2.77E-56	49.98411904	55.55806623	black
PGP	8.57E-58	1.089632778	0.286	0.065	1.94E-53	3.43E-56	60.43683537	55.46532429	red
ALDOC	9.37E-58	0.924830051	0.408	0.133	2.12E-53	3.73E-56	51.2622018	55.4287804	black
MFSD11	9.99E-58	0.774844508	0.448	0.153	2.26E-53	3.96E-56	42.92846298	55.40268085	black
TMEM59L	1.83E-57	0.733973714	0.689	0.328	4.14E-53	7.21E-56	40.47275035	55.1419616	black
PTPN1	1.85E-57	0.973976128	0.349	0.099	4.18E-53	7.25E-56	53.70476498	55.13971382	black
MOBP	2.37E-57	1.230383411	0.247	0.047	5.35E-53	9.25E-56	67.7129628	55.03403426	red
DBI	2.39E-57	1.190056307	0.266	0.056	5.40E-53	9.29E-56	65.49118042	55.03200148	red
LAMP1	3.01E-57	0.809117356	0.505	0.191	6.81E-53	1.16E-55	44.44782948	54.93372393	black
GNAS	3.70E-57	0.596867579	0.941	0.669	8.36E-53	1.42E-55	32.73595838	54.84626667	black
MYL12B	3.72E-57	0.976150405	0.387	0.122	8.41E-53	1.43E-55	53.53765901	54.84570689	black
PACSIN1	4.03E-57	0.618507575	0.884	0.531	9.10E-53	1.54E-55	33.90242601	54.81327532	black
TMEM246	6.03E-57	0.821032351	0.467	0.169	1.36E-52	2.29E-55	44.86129667	54.64010841	black
RPL10	6.20E-57	0.641917665	0.591	0.24	1.40E-52	2.35E-55	35.0677606	54.62968617	black
ATP5L	8.50E-57	0.711543485	0.622	0.27	1.92E-52	3.20E-55	38.77554608	54.49497731	black
BNIP3L	1.05E-56	1.048854328	0.324	0.087	2.38E-52	3.94E-55	57.06242148	54.40452498	red
PGAM1	1.06E-56	0.807627959	0.489	0.183	2.40E-52	3.97E-55	43.93598585	54.40126901	black
TUBB3	1.24E-56	0.715963489	0.65	0.299	2.80E-52	4.60E-55	38.90339072	54.33711536	black
PCGF6	1.60E-56	0.837567011	0.378	0.117	3.62E-52	5.93E-55	45.41888711	54.22716811	black
PDCD7	1.79E-56	0.762220663	0.456	0.16	4.06E-52	6.61E-55	41.29690395	54.17972243	black
CFL1	2.01E-56	0.798748514	0.539	0.22	4.55E-52	7.38E-55	43.237891	54.13204565	black
SRP14	2.69E-56	0.91123894	0.334	0.091	6.08E-52	9.83E-55	49.2136764	54.00743341	black
UBL5	2.74E-56	0.979421878	0.361	0.108	6.19E-52	9.97E-55	52.89026979	54.00151964	black
RCHY1	3.12E-56	0.727843877	0.482	0.174	7.06E-52	1.13E-54	39.26476561	53.94668674	black
RAB5B	3.84E-56	0.817734883	0.459	0.165	8.69E-52	1.39E-54	44.04175262	53.85822902	black
DLG2	5.06E-56	-0.405387664	0.998	0.993	1.14E-51	1.82E-54	21.78593135	53.74098247	black
TMED9	6.45E-56	0.733036249	0.529	0.209	1.46E-51	2.31E-54	39.31797482	53.63714939	black
NLGN1	7.10E-56	-0.601062821	0.972	0.959	1.60E-51	2.53E-54	32.21537788	53.59735581	black
CSRP1	7.73E-56	1.47540777	0.167	0.014	1.75E-51	2.74E-54	79.02652921	53.56250036	red
ATP2C1	8.46E-56	0.652021854	0.693	0.329	1.91E-51	2.98E-54	34.89953672	53.52510272	black
COX6C	1.09E-55	0.635278978	0.729	0.353	2.46E-51	3.82E-54	33.93504615	53.4175493	black
MAG	1.17E-55	1.376447113	0.21	0.032	2.64E-51	4.09E-54	73.48658246	53.38859863	red
TUBB2A	1.21E-55	0.77998043	0.49	0.184	2.75E-51	4.24E-54	41.62997129	53.37309719	black
SF3B2	1.23E-55	0.763735904	0.539	0.217	2.78E-51	4.27E-54	40.76026973	53.36958692	black
GM43713	1.29E-55	1.103326215	0.286	0.068	2.91E-51	4.45E-54	58.86435434	53.35172278	red
BABAM1	2.64E-55	0.864232784	0.375	0.117	5.96E-51	9.08E-54	45.84073253	53.0421125	black
GM15398	3.62E-55	1.26097681	0.298	0.078	8.18E-51	1.24E-53	66.71321084	52.90597758	red
YPEL3	4.22E-55	0.753872309	0.533	0.212	9.55E-51	1.44E-53	39.83511816	52.84067038	black
CIT	4.35E-55	0.629988156	0.873	0.571	9.83E-51	1.48E-53	33.28211859	52.82975284	black
SPCS2	5.13E-55	0.804491778	0.448	0.159	1.16E-50	1.74E-53	42.44502108	52.76004337	black
HBA.A1	5.29E-55	1.317077521	0.173	0.017	1.20E-50	1.79E-53	69.47356215	52.74827111	red
SCPEP1OS	8.24E-55	1.556898861	0.129	0.001	1.86E-50	2.77E-53	81.82682366	52.5575718	red
PFDN2	9.63E-55	0.824241893	0.424	0.148	2.18E-50	3.22E-53	43.26577957	52.49160461	black
RPS27A	1.09E-54	0.688602675	0.57	0.237	2.46E-50	3.63E-53	36.11074858	52.44061616	black
CADM2	1.30E-54	-0.6000231	0.982	0.97	2.93E-50	4.31E-53	31.42034005	52.36521732	black
NDUFC2	1.50E-54	0.754099806	0.427	0.146	3.38E-50	4.95E-53	39.44324006	52.30506592	black
ACTL6A	1.73E-54	1.229300537	0.244	0.049	3.91E-50	5.70E-53	64.22368554	52.2440881	red
X4930549G23RIK	1.81E-54	1.000939981	0.287	0.07	4.09E-50	5.95E-53	52.2746911	52.22560003	red
RPS5	1.85E-54	0.767081013	0.411	0.137	4.18E-50	6.05E-53	40.05566432	52.21829719	black
ATP5O	2.48E-54	0.797510494	0.399	0.133	5.61E-50	8.06E-53	41.54515234	52.09354943	black
FAU	2.48E-54	0.604627941	0.675	0.312	5.61E-50	8.06E-53	31.49721551	52.09354943	black
NELFB	2.51E-54	0.768841479	0.372	0.113	5.66E-50	8.10E-53	40.05009004	52.09147937	black
BCAP31	3.00E-54	0.923854389	0.383	0.123	6.79E-50	9.68E-53	48.05361188	52.0142703	black
FSD1	3.47E-54	0.882687756	0.399	0.134	7.85E-50	1.12E-52	45.85802675	51.95271652	black
GDE1	4.66E-54	0.765036057	0.459	0.169	1.05E-49	1.49E-52	39.64966946	51.82719047	black
CWC15	6.00E-54	0.969930739	0.29	0.072	1.36E-49	1.91E-52	50.16365703	51.71880322	black
MCCC1	6.66E-54	0.726424161	0.481	0.179	1.51E-49	2.11E-52	37.53787354	51.67486923	black
TAGLN3	7.87E-54	0.862876193	0.375	0.118	1.78E-49	2.49E-52	44.52794318	51.60409285	black
NDUFA8	1.04E-53	0.993005396	0.304	0.081	2.34E-49	3.27E-52	51.12591785	51.48604234	black
NDUFB5	1.11E-53	0.721176149	0.525	0.211	2.51E-49	3.49E-52	37.11009446	51.45773954	black
SDHB	1.13E-53	0.806734847	0.404	0.136	2.56E-49	3.55E-52	41.50681666	51.45038278	black
ANKRD11	1.36E-53	0.648563996	0.749	0.376	3.08E-49	4.25E-52	33.31799616	51.37194847	black
PITPNA	1.46E-53	0.690543422	0.668	0.315	3.31E-49	4.54E-52	35.45447106	51.34285539	black
RAE1	1.88E-53	0.70344614	0.416	0.14	4.25E-49	5.81E-52	36.04162785	51.23580299	black
CDC37L1	1.98E-53	0.731515818	0.497	0.194	4.49E-49	6.11E-52	37.46356695	51.21361158	black
JUND	2.05E-53	0.991812496	0.339	0.1	4.64E-49	6.31E-52	50.78099947	51.20020135	black
FRMPD3	2.29E-53	0.762809521	0.575	0.257	5.17E-49	7.00E-52	39.02162284	51.15513348	black
ARPC1A	2.57E-53	0.803500796	0.443	0.16	5.82E-49	7.84E-52	41.06323704	51.10540928	black
ATAT1	3.33E-53	0.861407983	0.416	0.146	7.53E-49	1.01E-51	43.92744938	50.99494114	black
MAN2B1	3.71E-53	1.008145991	0.266	0.06	8.38E-49	1.12E-51	51.3653355	50.95029487	red
TIMMDC1	3.87E-53	0.836514148	0.405	0.137	8.75E-49	1.17E-51	42.60614687	50.93296622	black
NAXD	4.39E-53	1.029428281	0.274	0.066	9.93E-49	1.32E-51	52.37692072	50.87962093	red
ATP5F1	5.10E-53	0.747218292	0.579	0.256	1.15E-48	1.53E-51	37.97072647	50.81610937	black
CYCS	5.23E-53	0.992171738	0.307	0.083	1.18E-48	1.55E-51	50.41085784	50.8086009	black
METTL2	5.23E-53	0.850369402	0.326	0.091	1.18E-48	1.55E-51	43.20607956	50.8086009	black
COPE	5.90E-53	0.795931378	0.388	0.128	1.33E-48	1.75E-51	40.39967275	50.75773347	black
NRG3OS	6.99E-53	0.766222397	0.496	0.199	1.58E-48	2.06E-51	38.83629165	50.68540385	black
ENO1	9.15E-53	0.888296035	0.376	0.123	2.07E-48	2.69E-51	44.92102419	50.56988033	black
TTC19	1.06E-52	0.645973586	0.759	0.397	2.39E-48	3.10E-51	32.62754456	50.50910019	black
RPL27A	1.54E-52	0.662807446	0.687	0.335	3.47E-48	4.49E-51	33.3711393	50.34816596	black
MRPS18A	1.58E-52	0.794967273	0.378	0.121	3.58E-48	4.61E-51	40.01572077	50.33631212	black
PTN	1.79E-52	0.729862174	0.586	0.261	4.05E-48	5.19E-51	36.70075181	50.28449632	black
SCN1B	1.92E-52	0.70645473	0.58	0.251	4.33E-48	5.54E-51	35.50397666	50.25654887	black
PTPN11	1.95E-52	0.7794917	0.415	0.146	4.41E-48	5.62E-51	39.16989124	50.25055588	black
COX5B	3.15E-52	0.684878832	0.53	0.217	7.11E-48	9.04E-51	34.27407522	50.04399845	black
CISD1	3.72E-52	0.823496736	0.377	0.123	8.41E-48	1.06E-50	41.15248328	49.97285537	black
RPS17	5.06E-52	0.781107636	0.457	0.169	1.14E-47	1.44E-50	38.93107996	49.84086462	black
TMBIM6	5.40E-52	0.708008229	0.512	0.204	1.22E-47	1.54E-50	35.26858446	49.81380589	black
X6430590A07RIK	6.01E-52	1.271481109	0.192	0.028	1.36E-47	1.70E-50	63.28023081	49.7689115	red
SELENOK	6.53E-52	0.691511984	0.53	0.215	1.48E-47	1.85E-50	34.3915919	49.73390582	black
ATP5B	9.42E-52	0.622938049	0.702	0.345	2.13E-47	2.65E-50	30.88315466	49.57660667	black
GM14204	1.10E-51	0.789013684	0.446	0.164	2.48E-47	3.08E-50	39.06568885	49.51205488	black
PEX19	1.37E-51	0.902001587	0.309	0.085	3.09E-47	3.83E-50	44.57424085	49.4170315	black
SF3B6	1.66E-51	0.87320323	0.34	0.102	3.76E-47	4.64E-50	43.07816376	49.33349108	black
PRICKLE1	1.81E-51	0.615469812	0.844	0.539	4.08E-47	5.02E-50	30.34225379	49.29933715	black
GM41231	1.96E-51	1.490277338	0.142	0.008	4.43E-47	5.43E-50	73.41874696	49.26515694	red
RPL24	2.70E-51	0.654471737	0.599	0.265	6.11E-47	7.46E-50	32.15246463	49.12735387	black
RPL14	3.57E-51	0.662012147	0.587	0.261	8.08E-47	9.83E-50	32.44356839	49.00751222	black
STX16	4.04E-51	0.634564862	0.665	0.312	9.14E-47	1.11E-49	31.06531667	48.95530552	black
RPL11	4.52E-51	0.651513784	0.632	0.287	1.02E-46	1.24E-49	31.86436988	48.9082053	black
TUBB4B	4.67E-51	0.852343357	0.358	0.115	1.06E-46	1.27E-49	41.67561003	48.8953304	black
RNF114	4.96E-51	0.889497436	0.309	0.087	1.12E-46	1.35E-49	43.47053188	48.87089061	black
CCK	6.18E-51	1.129161794	0.225	0.043	1.40E-46	1.67E-49	55.07644918	48.77640164	red
CFDP1	6.27E-51	0.731781525	0.479	0.186	1.42E-46	1.69E-49	35.69022333	48.77169223	black
CHGA	6.67E-51	0.676771343	0.665	0.328	1.51E-46	1.79E-49	32.99003079	48.74619935	black
HDGF	7.01E-51	0.602483549	0.511	0.199	1.58E-46	1.88E-49	29.35659883	48.72597582	black
DNM2	8.17E-51	0.746793917	0.475	0.187	1.85E-46	2.18E-49	36.33957891	48.6607859	black
TCEAL9	8.21E-51	0.849978184	0.331	0.098	1.85E-46	2.19E-49	41.36023748	48.66035185	black
BORCS5	8.38E-51	1.061628371	0.26	0.062	1.89E-46	2.22E-49	51.6510762	48.65269018	red
MXI1	1.05E-50	0.977429347	0.278	0.07	2.37E-46	2.77E-49	47.46103162	48.55699469	black
CNIH1	1.21E-50	0.873171264	0.332	0.099	2.72E-46	3.18E-49	42.34663998	48.49751904	black
GM20642	1.85E-50	0.76207839	0.574	0.261	4.18E-46	4.86E-49	36.81832772	48.31304525	black
MRPL21	1.97E-50	0.87593035	0.315	0.091	4.46E-46	5.17E-49	42.295443	48.28630837	black
NRSN2	2.66E-50	0.657856053	0.665	0.322	6.02E-46	6.96E-49	31.68066061	48.15743572	black
LINGO2	2.85E-50	-0.530985296	0.954	0.963	6.45E-46	7.44E-49	25.55557078	48.12858469	black
KIF3A	3.20E-50	0.683589566	0.519	0.215	7.24E-46	8.32E-49	32.86673497	48.07963226	black
YPEL2	3.33E-50	0.830493404	0.365	0.12	7.53E-46	8.63E-49	39.91703141	48.06423654	black
SQSTM1	3.64E-50	0.810796168	0.357	0.114	8.23E-46	9.40E-49	38.94005353	48.02693338	black
ERG28	7.89E-50	0.837224148	0.362	0.118	1.78E-45	2.03E-48	39.92886273	47.69196259	black
RPS16	8.22E-50	0.639096278	0.473	0.182	1.86E-45	2.11E-48	30.46924756	47.67552028	black
VPS9D1	8.93E-50	0.785057109	0.361	0.117	2.02E-45	2.28E-48	37.40108052	47.64122266	black
PVALB	9.34E-50	1.130355561	0.282	0.077	2.11E-45	2.38E-48	53.83049495	47.62262141	red
STMN3	1.03E-49	0.529427174	0.909	0.62	2.34E-45	2.63E-48	25.19013663	47.5799843	black
RPS15A	1.17E-49	0.691808354	0.447	0.166	2.65E-45	2.97E-48	32.87961565	47.52705783	black
CTIF	1.25E-49	0.710032111	0.605	0.281	2.82E-45	3.15E-48	33.72765085	47.50158524	black
NARF	1.28E-49	0.809024595	0.356	0.114	2.90E-45	3.24E-48	38.42041771	47.48980182	black
SEC61A1	1.73E-49	0.786691067	0.344	0.108	3.92E-45	4.35E-48	37.25878921	47.36139861	black
DCTN4	1.74E-49	0.680771544	0.47	0.183	3.92E-45	4.35E-48	32.24229248	47.36139861	black
CACYBP	2.04E-49	1.146182498	0.228	0.048	4.60E-45	5.09E-48	54.20674402	47.2932924	red
SLC35B1	2.23E-49	0.757982715	0.39	0.135	5.03E-45	5.55E-48	35.81908059	47.25580135	black
CLTB	2.85E-49	0.642819394	0.529	0.218	6.45E-45	7.09E-48	30.30871485	47.14965839	black
COX7A2L	2.94E-49	0.882981839	0.325	0.099	6.64E-45	7.28E-48	41.62206102	47.13807148	black
EVL	3.75E-49	0.623679255	0.723	0.381	8.47E-45	9.26E-48	29.33387869	47.03359692	black
LRRC4C	4.01E-49	-0.637855121	0.954	0.96	9.07E-45	9.89E-48	29.98233986	47.00493714	black
KRTCAP2	4.20E-49	0.796933964	0.361	0.12	9.49E-45	1.03E-47	37.44546219	46.98690719	black
UQCRB	4.29E-49	0.764537493	0.404	0.143	9.69E-45	1.05E-47	35.91700173	46.97873168	black
RPL18A	4.73E-49	0.605122992	0.547	0.228	1.07E-44	1.16E-47	28.40282478	46.9372758	black
OAZ1	5.03E-49	0.585389786	0.641	0.292	1.14E-44	1.22E-47	27.46230929	46.91286039	black
ARL3	5.03E-49	0.614257572	0.636	0.294	1.14E-44	1.22E-47	28.81657972	46.91286039	black
NOB1	5.44E-49	0.829277019	0.327	0.099	1.23E-44	1.32E-47	38.8772082	46.88084595	black
CNOT3	5.57E-49	0.609117593	0.432	0.157	1.26E-44	1.34E-47	28.55043901	46.87180164	black
NDUFS5	6.53E-49	0.667746126	0.516	0.213	1.48E-44	1.57E-47	31.25290269	46.80357018	black
RPS11	7.05E-49	0.60583437	0.536	0.224	1.59E-44	1.69E-47	28.33570844	46.77137816	black
SNHG3	8.53E-49	1.148602776	0.196	0.033	1.93E-44	2.04E-47	53.62847429	46.69018342	red
RBM39	1.14E-48	0.410242738	0.982	0.843	2.57E-44	2.71E-47	19.10366822	46.56674323	black
DPM1	1.28E-48	0.615255168	0.518	0.211	2.89E-44	3.04E-47	28.61961512	46.51665945	black
RPS7	1.54E-48	0.660477374	0.536	0.228	3.48E-44	3.65E-47	30.67094394	46.43753921	black
WBP2	1.79E-48	0.747431544	0.351	0.112	4.05E-44	4.24E-47	34.6605502	46.37287585	black
OSTC	2.06E-48	0.920026577	0.29	0.081	4.65E-44	4.85E-47	42.6099472	46.31382206	black
RPL4	2.11E-48	0.758567663	0.407	0.146	4.76E-44	4.96E-47	35.12524929	46.30470161	black
SERINC1	2.57E-48	0.556459348	0.846	0.509	5.81E-44	6.03E-47	25.71924931	46.21945774	black
SRP9	2.64E-48	0.859098938	0.285	0.078	5.98E-44	6.19E-47	39.6976156	46.20843285	black
B230206L02RIK	3.26E-48	1.245085555	0.16	0.018	7.38E-44	7.62E-47	57.42094882	46.11807485	red
GM32509	3.69E-48	0.71615151	0.505	0.21	8.35E-44	8.59E-47	32.990121	46.06584016	black
TIMM17A	3.87E-48	0.985428203	0.29	0.082	8.74E-44	8.98E-47	45.37590185	46.04688773	black
SCG3	4.09E-48	0.670334394	0.574	0.254	9.24E-44	9.46E-47	30.85151458	46.02406627	black
SHISA4	5.01E-48	0.690748864	0.394	0.137	1.13E-43	1.16E-46	31.73102425	45.93713564	black
ZFP398	5.14E-48	0.629998535	0.647	0.315	1.16E-43	1.18E-46	28.93391797	45.92696073	black
TXNDC15	5.22E-48	0.648714319	0.533	0.225	1.18E-43	1.20E-46	29.79011649	45.92178036	black
NCEH1	5.32E-48	0.614280231	0.551	0.24	1.20E-43	1.22E-46	28.20449758	45.91470826	black
RPL15	7.64E-48	0.770383345	0.4	0.143	1.73E-43	1.74E-46	35.25156471	45.75847197	black
HNRNPH3	8.85E-48	0.652449831	0.674	0.337	2.00E-43	2.02E-46	29.8139662	45.69541564	black
PGK1	8.93E-48	0.808797875	0.32	0.098	2.02E-43	2.03E-46	36.95617212	45.69271662	black
BEX2	8.98E-48	0.579627735	0.59	0.264	2.03E-43	2.03E-46	26.48409575	45.69156053	black
SPIRE1	9.01E-48	0.586364102	0.693	0.331	2.04E-43	2.04E-46	26.79180139	45.69140795	black
RPS14	9.82E-48	0.603189627	0.596	0.273	2.22E-43	2.21E-46	27.53856522	45.65490516	black
FAM220A.1	1.22E-47	1.075774565	0.192	0.033	2.77E-43	2.75E-46	49.0126029	45.56029163	red
RSAD1	1.29E-47	0.917031481	0.238	0.054	2.91E-43	2.89E-46	41.7609274	45.53925168	black
FDPS	1.42E-47	1.022966087	0.243	0.057	3.20E-43	3.17E-46	46.54437575	45.49943183	red
RPL9	1.49E-47	0.624848411	0.621	0.289	3.37E-43	3.33E-46	28.41673465	45.47780572	black
KCND2	1.72E-47	-0.687664921	0.941	0.93	3.88E-43	3.82E-46	31.23264682	45.41840929	black
CYP51	1.75E-47	0.846896116	0.304	0.088	3.96E-43	3.88E-46	38.45848772	45.41110416	black
TMED2	2.06E-47	0.747276188	0.38	0.133	4.67E-43	4.57E-46	33.88179499	45.34039158	black
SLC25A23	2.20E-47	0.580383702	0.647	0.312	4.98E-43	4.86E-46	26.29910274	45.31330336	black
RPS3	2.88E-47	0.803344885	0.391	0.142	6.50E-43	6.33E-46	36.31024768	45.19882851	black
RPS4X	3.80E-47	0.708515032	0.399	0.143	8.58E-43	8.33E-46	31.93934162	45.07927169	black
ATP5MD	6.22E-47	0.668606574	0.531	0.231	1.41E-42	1.36E-45	29.99758211	44.86581988	black
ELOB	6.39E-47	0.651003551	0.449	0.173	1.44E-42	1.40E-45	29.20090678	44.85521888	black
GLO1	7.52E-47	0.982543938	0.266	0.07	1.70E-42	1.64E-45	44.00405904	44.78584352	black
PSMB7	8.91E-47	0.793623173	0.339	0.109	2.01E-42	1.94E-45	35.48541132	44.71317439	black
ERMN	9.53E-47	1.428577004	0.131	0.008	2.15E-42	2.07E-45	63.83593614	44.68498091	red
PEX13	9.73E-47	0.657758256	0.473	0.19	2.20E-42	2.10E-45	29.38684192	44.67726802	black
LETM2	9.99E-47	0.632324101	0.516	0.223	2.26E-42	2.15E-45	28.24383446	44.66670557	black
ARHGAP23	1.10E-46	0.779115059	0.403	0.149	2.50E-42	2.37E-45	34.76753228	44.62438748	black
ABRAXAS2	1.12E-46	0.862033243	0.279	0.076	2.52E-42	2.40E-45	38.46438662	44.62053746	black
DNAJC15	1.46E-46	0.707422666	0.368	0.127	3.30E-42	3.12E-45	31.48397506	44.50518283	black
TTLL7	1.47E-46	0.596579077	0.628	0.296	3.33E-42	3.14E-45	26.54959301	44.50305756	black
MORF4L1	1.78E-46	0.597371946	0.711	0.364	4.03E-42	3.80E-45	26.53547191	44.42035165	black
ABLIM3	1.95E-46	0.582564406	0.508	0.21	4.41E-42	4.14E-45	25.85604345	44.38315005	black
VDAC2	2.01E-46	0.658912776	0.409	0.151	4.53E-42	4.25E-45	29.23715515	44.37181404	black
NKIRAS1	2.24E-46	0.693670261	0.362	0.123	5.07E-42	4.74E-45	30.74665343	44.3245951	black
RAB2A	2.46E-46	0.634381153	0.579	0.266	5.56E-42	5.18E-45	28.09377986	44.28533183	black
MOK	2.62E-46	0.899033695	0.26	0.068	5.92E-42	5.50E-45	39.7906197	44.25931969	black
ATP5G3	2.76E-46	0.684669819	0.454	0.18	6.25E-42	5.79E-45	30.28772513	44.23698004	black
ZDHHC14	3.02E-46	0.707044136	0.441	0.173	6.82E-42	6.31E-45	31.25127821	44.1998973	black
MAPRE2	3.09E-46	0.629264776	0.553	0.246	6.98E-42	6.45E-45	27.80765283	44.19070303	black
SAR1B	3.36E-46	0.812976207	0.328	0.105	7.60E-42	7.00E-45	35.89693389	44.15496245	black
RPL37A	3.69E-46	0.575832909	0.615	0.286	8.33E-42	7.66E-45	25.40345034	44.11600993	black
HERC1	3.89E-46	-0.777741008	0.819	0.769	8.79E-42	8.05E-45	34.29377685	44.09408335	black
NAGK	4.42E-46	0.712356104	0.412	0.153	9.98E-42	9.12E-45	31.37204598	44.03983596	black
NDUFB10	4.43E-46	0.803510046	0.339	0.112	1.00E-41	9.14E-45	35.38589476	44.0391442	black
CALB2	4.47E-46	1.155921267	0.22	0.049	1.01E-41	9.20E-45	50.90266456	44.0364461	red
RPS8	4.83E-46	0.539249967	0.75	0.391	1.09E-41	9.92E-45	23.72895698	44.00363175	black
SLC32A1	5.79E-46	0.542223033	0.819	0.488	1.31E-41	1.19E-44	23.81780285	43.92621008	black
BASP1	6.03E-46	0.608549635	0.624	0.303	1.36E-41	1.23E-44	26.7213107	43.90982949	black
TPM1	6.41E-46	0.786105572	0.351	0.12	1.45E-41	1.30E-44	34.49784609	43.88449506	black
FBXO21	7.51E-46	0.664216461	0.45	0.177	1.70E-41	1.53E-44	29.10351887	43.81631681	black
PKIG	7.63E-46	0.783236143	0.324	0.102	1.72E-41	1.55E-44	34.31414519	43.81072745	black
MIF	7.97E-46	0.755006532	0.395	0.144	1.80E-41	1.61E-44	33.06376628	43.79268902	black
EEF1G	8.76E-46	0.574811924	0.526	0.223	1.98E-41	1.77E-44	25.14957843	43.75270828	black
MORN1	9.99E-46	0.821057595	0.287	0.081	2.26E-41	2.01E-44	35.87751284	43.69670663	black
PSMA5	1.17E-45	0.772889245	0.332	0.108	2.63E-41	2.34E-44	33.72182851	43.63086785	black
DNAJB9	1.27E-45	0.874007132	0.252	0.064	2.88E-41	2.55E-44	38.10083007	43.59327135	black
TRIM26	1.28E-45	0.866446423	0.281	0.079	2.89E-41	2.56E-44	37.77035411	43.59225579	black
RPL8	1.31E-45	0.612647506	0.549	0.241	2.96E-41	2.61E-44	26.70099862	43.58297122	black
COPB1	1.44E-45	0.63209957	0.482	0.198	3.25E-41	2.86E-44	27.52393925	43.54367659	black
MAU2	1.56E-45	0.591267646	0.5	0.206	3.53E-41	3.10E-44	25.72520441	43.50856095	black
D130043K22RIK	1.63E-45	0.846519431	0.326	0.106	3.69E-41	3.23E-44	36.81547917	43.49041242	black
ATP6V1F	1.70E-45	0.643302131	0.369	0.128	3.84E-41	3.35E-44	27.9674188	43.47478028	black
BAIAP2	1.71E-45	0.7419667	0.322	0.101	3.88E-41	3.38E-44	32.25426256	43.47130745	black
PSMB5	1.76E-45	0.807692606	0.319	0.1	3.98E-41	3.46E-44	35.1028651	43.46067409	black
MOG	1.92E-45	1.471517639	0.154	0.018	4.35E-41	3.77E-44	63.89794354	43.42315842	red
VSTM5	2.03E-45	0.855580306	0.296	0.089	4.59E-41	3.98E-44	37.132611	43.40049755	black
POLB	2.23E-45	0.606059865	0.786	0.457	5.04E-41	4.35E-44	26.27944088	43.36113046	black
NDUFA10	2.33E-45	0.57805762	0.538	0.234	5.26E-41	4.53E-44	25.05526553	43.34388938	black
PSMB6	2.44E-45	0.742663679	0.32	0.102	5.51E-41	4.73E-44	32.17577429	43.32482548	black
SIPA1L1	2.93E-45	0.575100522	0.634	0.312	6.62E-41	5.68E-44	24.87059993	43.24565704	black
MRPS10	3.02E-45	0.866674603	0.285	0.082	6.83E-41	5.84E-44	37.46926156	43.23336746	black
BTF3	4.85E-45	0.906776249	0.261	0.07	1.10E-40	9.36E-44	39.01724712	43.02852787	black
TUBB4A	5.91E-45	0.694928197	0.421	0.161	1.34E-40	1.14E-43	29.84286602	42.94381223	black
NDUFB4	6.15E-45	0.859578256	0.307	0.095	1.39E-40	1.18E-43	36.89936307	42.92728765	black
PSMD9	7.37E-45	0.642712125	0.351	0.119	1.67E-40	1.41E-43	27.54004296	42.84973303	black
CISD2	7.53E-45	0.657676164	0.406	0.15	1.70E-40	1.44E-43	28.17578625	42.84142837	black
RPL17	9.15E-45	0.532951235	0.594	0.269	2.07E-40	1.75E-43	22.78795404	42.75804713	black
EMC7	9.32E-45	0.72796095	0.462	0.188	2.11E-40	1.78E-43	31.12089673	42.75077765	black
PIK3IP1	9.67E-45	0.775170416	0.315	0.1	2.19E-40	1.84E-43	33.1275603	42.73584184	black
SNRPB	1.03E-44	0.704416364	0.358	0.123	2.33E-40	1.96E-43	30.08442144	42.70829436	black
VDAC1	1.04E-44	0.653546387	0.455	0.184	2.34E-40	1.96E-43	27.91154566	42.70782644	black
MAFG	2.38E-44	0.580297551	0.492	0.205	5.39E-40	4.50E-43	24.57391442	42.34709308	black
TMX2	2.72E-44	0.58931051	0.633	0.303	6.15E-40	5.12E-43	24.92228018	42.29057473	black
ZBTB16	3.25E-44	0.981644528	0.236	0.059	7.34E-40	6.09E-43	41.44041523	42.21529692	black
PDE4A	3.25E-44	0.578081087	0.611	0.289	7.35E-40	6.09E-43	24.40386472	42.21529692	black
ANK	3.99E-44	0.586659984	0.587	0.273	9.03E-40	7.47E-43	24.71399563	42.12660881	black
COQ5	4.94E-44	0.675602149	0.379	0.138	1.12E-39	9.22E-43	28.39918079	42.03536184	black
TIMM9	5.77E-44	0.55328566	0.669	0.339	1.31E-39	1.08E-42	23.22061159	41.96857659	black
ATP6V1G1	5.84E-44	0.848048403	0.268	0.075	1.32E-39	1.09E-42	35.58779887	41.96434865	black
GM45435	5.95E-44	0.716562189	0.347	0.117	1.34E-39	1.10E-42	30.06508319	41.95739552	black
RPL30	7.03E-44	0.633084181	0.498	0.212	1.59E-39	1.30E-42	26.51729025	41.88588348	black
TPR	8.16E-44	0.519860906	0.732	0.376	1.85E-39	1.51E-42	21.74160478	41.82196535	black
LARS	8.30E-44	0.574419661	0.497	0.209	1.88E-39	1.53E-42	24.01984701	41.81585106	black
TRAPPC2L	1.05E-43	0.896826088	0.26	0.072	2.37E-39	1.93E-42	37.41125343	41.7151708	black
AY036118	1.15E-43	0.875068874	0.285	0.085	2.60E-39	2.11E-42	36.46918978	41.67579358	black
COX6B1	1.26E-43	0.597419435	0.557	0.251	2.84E-39	2.30E-42	24.87556404	41.63835752	black
ZCCHC17	1.27E-43	0.849565013	0.309	0.099	2.87E-39	2.32E-42	35.37125195	41.63454403	black
BC031181	1.67E-43	0.679103371	0.407	0.154	3.77E-39	3.04E-42	28.19483765	41.51774068	black
FXN	1.69E-43	1.115005276	0.154	0.02	3.83E-39	3.08E-42	46.28527237	41.51125863	red
TMCO1	1.90E-43	0.781406312	0.331	0.111	4.29E-39	3.45E-42	32.39911797	41.46257522	black
CNBP	2.18E-43	0.674515841	0.34	0.114	4.92E-39	3.94E-42	27.92774064	41.40412862	black
NDUFA11	2.29E-43	0.62998709	0.391	0.145	5.18E-39	4.14E-42	26.07066798	41.38286066	black
MACROD1	2.46E-43	0.838228452	0.274	0.079	5.56E-39	4.43E-42	34.66337128	41.35313137	black
ZFP408	2.67E-43	0.980333542	0.225	0.054	6.03E-39	4.80E-42	40.50603832	41.31862939	black
ATP5G1	2.98E-43	0.596877374	0.519	0.227	6.75E-39	5.36E-42	24.63380837	41.27113784	black
SENP8	3.00E-43	0.728347123	0.317	0.104	6.78E-39	5.37E-42	30.05892512	41.270054	black
MLLT11	3.17E-43	0.622697375	0.416	0.16	7.17E-39	5.67E-42	25.68416846	41.24663036	black
HSPA4	3.52E-43	0.52175699	0.571	0.257	7.96E-39	6.28E-42	21.49740493	41.20194909	black
EIF3H	3.72E-43	0.848843796	0.312	0.102	8.40E-39	6.61E-42	34.95504579	41.17959742	black
RBM4B	4.16E-43	0.638201815	0.454	0.187	9.39E-39	7.38E-42	26.25040741	41.13182817	black
NDUFB9	4.19E-43	0.676011856	0.402	0.155	9.47E-39	7.42E-42	27.8040114	41.12947306	black
GUK1	4.23E-43	0.842374481	0.267	0.076	9.55E-39	7.48E-42	34.64375289	41.12630861	black
ATG16L2	4.74E-43	0.675926799	0.396	0.149	1.07E-38	8.36E-42	27.76565294	41.07789925	black
TMEM175	5.71E-43	0.608440979	0.465	0.192	1.29E-38	1.01E-41	24.94463762	40.99762914	black
VCP	5.87E-43	0.598033833	0.504	0.217	1.33E-38	1.03E-41	24.5114515	40.98673041	black
GM26724	8.42E-43	1.111307541	0.17	0.028	1.90E-38	1.48E-41	45.37548429	40.83071751	red
DCTN3	1.10E-42	0.963339144	0.223	0.054	2.49E-38	1.93E-41	39.22166544	40.71428601	black
PPP1R11	1.19E-42	0.772080861	0.252	0.068	2.68E-38	2.07E-41	31.41073791	40.68322309	black
XPNPEP1	1.30E-42	0.863247606	0.257	0.072	2.95E-38	2.27E-41	35.08549306	40.64360308	black
HARS	1.33E-42	0.894413762	0.259	0.072	3.01E-38	2.31E-41	36.34504584	40.63560666	black
SYCP3	1.55E-42	0.788806362	0.305	0.098	3.51E-38	2.69E-41	32.00179051	40.56989403	black
NUDC	1.65E-42	0.778531692	0.29	0.089	3.73E-38	2.86E-41	31.5650032	40.54427523	black
RPL23	1.70E-42	0.579316841	0.548	0.247	3.85E-38	2.95E-41	23.48019389	40.5308326	black
PDHB	1.71E-42	0.638583896	0.422	0.167	3.87E-38	2.95E-41	25.88175127	40.52991539	black
TECPR1	1.81E-42	0.592440457	0.451	0.183	4.09E-38	3.11E-41	23.997786	40.50666314	black
DPY30	1.99E-42	0.777427234	0.293	0.091	4.50E-38	3.42E-41	31.45954931	40.46623006	black
WASL	2.15E-42	0.69714079	0.394	0.153	4.87E-38	3.70E-41	28.18705672	40.43237338	black
ARF1	2.31E-42	0.679644567	0.383	0.144	5.22E-38	3.95E-41	27.45970827	40.40304243	black
UQCRFS1	2.56E-42	0.859640514	0.242	0.064	5.79E-38	4.38E-41	34.69405134	40.35879044	black
RPS19	3.04E-42	0.552999357	0.554	0.252	6.88E-38	5.19E-41	22.27747771	40.28481668	black
TM2D3	3.07E-42	0.511247913	0.514	0.219	6.93E-38	5.22E-41	20.59430236	40.28241845	black
GM2516	3.09E-42	1.132662177	0.212	0.049	6.98E-38	5.24E-41	45.62406654	40.28038323	red
CCDC58	3.11E-42	0.748141687	0.331	0.115	7.03E-38	5.27E-41	30.13389294	40.27832355	black
FEZ1	3.27E-42	0.582139451	0.474	0.199	7.40E-38	5.54E-41	23.43508069	40.25681586	black
AARSD1	3.38E-42	0.666321358	0.364	0.133	7.65E-38	5.71E-41	26.81504705	40.24341518	black
GUF1	3.67E-42	0.476110148	0.493	0.204	8.30E-38	6.19E-41	19.1436613	40.20847143	black
X2310058D17RIK	3.80E-42	1.071757376	0.151	0.02	8.59E-38	6.39E-41	43.07899126	40.19472339	red
MGLL	3.93E-42	1.079042368	0.245	0.067	8.88E-38	6.59E-41	43.35729098	40.18126837	red
CMIP	4.04E-42	0.499675143	0.786	0.437	9.12E-38	6.76E-41	20.07204932	40.17019777	black
TCTA	6.53E-42	0.896475006	0.217	0.051	1.47E-37	1.09E-40	35.82532015	39.96243054	black
RNF227	9.48E-42	0.594007678	0.478	0.204	2.14E-37	1.58E-40	23.64214562	39.80107746	black
GSTZ1	9.71E-42	0.722371733	0.309	0.102	2.19E-37	1.62E-40	28.74434243	39.79162128	black
FBXO28	1.16E-41	0.818988542	0.281	0.086	2.61E-37	1.92E-40	32.52764169	39.71684587	black
BACH2	1.25E-41	0.517990664	0.636	0.315	2.82E-37	2.07E-40	20.5560589	39.6842266	black
SLC38A2	1.44E-41	0.520412965	0.656	0.329	3.24E-37	2.37E-40	20.62105952	39.62441545	black
SCARB1	1.45E-41	0.778290444	0.275	0.082	3.27E-37	2.39E-40	30.83698362	39.62143423	black
IER3IP1	1.51E-41	0.617020545	0.388	0.148	3.41E-37	2.49E-40	24.4365909	39.60417706	black
MAP1B	1.66E-41	0.448143037	0.946	0.746	3.75E-37	2.73E-40	17.73052811	39.56443955	black
RHEB	1.91E-41	0.576772807	0.415	0.164	4.33E-37	3.14E-40	22.78412905	39.50277955	black
MRPS21	2.27E-41	0.790057678	0.282	0.087	5.12E-37	3.71E-40	31.15226128	39.43036329	black
TMBIM4	2.49E-41	0.669890783	0.331	0.114	5.62E-37	4.07E-40	26.38757197	39.3908569	black
TMED5	2.57E-41	0.833502102	0.249	0.069	5.80E-37	4.19E-40	32.82153464	39.37786668	black
NDUFA2	2.66E-41	0.589453541	0.405	0.159	6.02E-37	4.34E-40	23.20227377	39.36234522	black
NDUFC1	3.14E-41	0.787118232	0.302	0.099	7.09E-37	5.10E-40	30.92775711	39.29239073	black
SH3GL1	3.24E-41	0.808608331	0.268	0.079	7.32E-37	5.25E-40	31.76179197	39.27957548	black
SLCO3A1	3.33E-41	0.563535583	0.729	0.409	7.53E-37	5.39E-40	22.12897569	39.26810721	black
H3F3B	3.98E-41	0.671184058	0.41	0.163	9.00E-37	6.44E-40	26.30444769	39.19110915	black
TAF6	4.08E-41	0.831655476	0.259	0.075	9.22E-37	6.59E-40	32.58544047	39.18141754	black
EMC10	4.17E-41	0.49102868	0.576	0.263	9.43E-37	6.72E-40	19.23497869	39.17282121	black
SELENOF	4.41E-41	0.698682425	0.352	0.128	9.97E-37	7.09E-40	27.35284673	39.14918386	black
NDUFAF7	4.44E-41	0.545461562	0.44	0.181	1.00E-36	7.13E-40	21.35329141	39.14719734	black
DNTTIP1	4.54E-41	0.736551479	0.281	0.086	1.03E-36	7.28E-40	28.82726109	39.13814842	black
CALY	6.21E-41	0.563883742	0.724	0.406	1.40E-36	9.93E-40	21.99320171	39.00307827	black
B4GAT1	6.68E-41	0.651342655	0.305	0.099	1.51E-36	1.07E-39	25.38427597	38.97223034	black
FAM133B	7.85E-41	0.504043207	0.486	0.206	1.78E-36	1.25E-39	19.60871305	38.9028416	black
UBE2I	8.48E-41	0.758534488	0.275	0.084	1.92E-36	1.35E-39	29.48457881	38.87045253	black
CBY1	1.01E-40	0.99186074	0.192	0.041	2.29E-36	1.61E-39	38.47771536	38.79346546	black
GABARAP	1.07E-40	0.76232697	0.284	0.09	2.42E-36	1.70E-39	29.55594597	38.77069438	black
TUBB5	1.18E-40	0.638247728	0.407	0.161	2.66E-36	1.86E-39	24.72015408	38.73128409	black
PSIP1	1.18E-40	0.525149235	0.619	0.299	2.66E-36	1.86E-39	20.33970421	38.73128409	black
ZFP30	1.19E-40	0.845786143	0.246	0.068	2.68E-36	1.87E-39	32.75595192	38.72840931	black
UBE2J2	1.23E-40	0.58472612	0.383	0.144	2.79E-36	1.94E-39	22.63600297	38.71214607	black
SNW1	1.60E-40	0.792815682	0.287	0.091	3.61E-36	2.50E-39	30.60371317	38.60129646	black
QDPR	1.77E-40	0.94214097	0.212	0.051	4.01E-36	2.78E-39	36.32576618	38.55661449	black
SF3B3	1.82E-40	0.578889923	0.372	0.138	4.11E-36	2.84E-39	22.31408256	38.54633098	black
MBNL2	1.87E-40	0.553828149	0.739	0.413	4.23E-36	2.92E-39	21.34170624	38.534889	black
PDCD2L	2.15E-40	0.670519165	0.328	0.114	4.86E-36	3.35E-39	25.79860198	38.4755624	black
LRRC29	2.27E-40	0.774653674	0.252	0.073	5.12E-36	3.52E-39	29.78780895	38.45306611	black
RPS25	2.41E-40	0.57112524	0.454	0.191	5.46E-36	3.75E-39	21.94633096	38.42647713	black
AP1S1	2.60E-40	0.862232717	0.257	0.074	5.89E-36	4.03E-39	33.10489115	38.39438065	black
BTBD1	2.79E-40	0.524496522	0.543	0.248	6.31E-36	4.31E-39	20.12240828	38.36518918	black
PFDN5	3.11E-40	0.662965436	0.364	0.136	7.03E-36	4.80E-39	25.40424061	38.31910266	black
SNRNP27	3.35E-40	0.829413754	0.256	0.075	7.56E-36	5.15E-39	31.7565735	38.28797551	black
CALR	4.31E-40	0.552457428	0.625	0.315	9.74E-36	6.62E-39	21.09227383	38.17900305	black
EIF1B	4.51E-40	0.563223456	0.317	0.108	1.02E-35	6.92E-39	21.4927109	38.1601843	black
CCDC191	4.55E-40	0.801795743	0.244	0.069	1.03E-35	6.97E-39	30.5940884	38.15696036	black
CCDC174	5.79E-40	0.563698495	0.446	0.186	1.31E-35	8.85E-39	21.45037039	38.05291407	black
DTNBOS	5.84E-40	0.942546714	0.176	0.034	1.32E-35	8.92E-39	35.86348537	38.04955747	black
GM15283	6.58E-40	1.099997559	0.157	0.026	1.49E-35	1.00E-38	41.79855575	37.99877136	red
EIF5	6.79E-40	0.542325918	0.469	0.199	1.53E-35	1.03E-38	20.60096284	37.98631441	black
EEF1A2	7.01E-40	0.647342091	0.437	0.18	1.58E-35	1.06E-38	24.58141961	37.97284302	black
PARK7	7.18E-40	0.753245811	0.323	0.113	1.62E-35	1.09E-38	28.59572666	37.96333977	black
RPL37	7.59E-40	0.5205708	0.625	0.305	1.72E-35	1.15E-38	19.75037411	37.93984238	black
OLIG1	7.98E-40	1.264538828	0.121	0.01	1.80E-35	1.20E-38	47.95009042	37.91903368	red
MAP1LC3B	8.08E-40	0.807836062	0.243	0.067	1.83E-35	1.22E-38	30.62873157	37.9145386	black
NAP1L3	8.39E-40	0.837971245	0.214	0.053	1.90E-35	1.26E-38	31.75798156	37.89865312	black
SPCS1	8.41E-40	0.576864999	0.403	0.158	1.90E-35	1.26E-38	21.86217157	37.8982459	black
NEFM	8.56E-40	1.029772962	0.26	0.08	1.93E-35	1.28E-38	39.01983498	37.89168722	red
CAMK2G	8.77E-40	0.562855049	0.596	0.297	1.98E-35	1.31E-38	21.32207236	37.88199536	black
DNAJB11	9.61E-40	0.820848574	0.246	0.07	2.17E-35	1.44E-38	31.06315757	37.84273805	black
TMEM165	9.98E-40	0.673692551	0.335	0.118	2.26E-35	1.49E-38	25.48392924	37.82723917	black
IFT122	1.14E-39	0.825386382	0.257	0.076	2.58E-35	1.70E-38	31.1750005	37.77019002	black
TEK	1.15E-39	1.298728637	0.102	0.004	2.60E-35	1.71E-38	49.04978383	37.76753853	red
CPNE5	1.25E-39	0.643302218	0.326	0.115	2.83E-35	1.86E-38	24.27212634	37.73051864	black
DYNLRB1	1.34E-39	0.684648383	0.318	0.111	3.02E-35	1.98E-38	25.8135412	37.70335524	black
DAD1	1.67E-39	0.621692574	0.408	0.166	3.79E-35	2.48E-38	23.37954005	37.60627199	black
TSN	1.80E-39	0.50004178	0.475	0.2	4.08E-35	2.66E-38	18.78904784	37.57495588	black
IFT20	2.18E-39	0.427504273	0.58	0.273	4.92E-35	3.20E-38	16.02893574	37.49421179	black
NDN	2.42E-39	0.452744422	0.593	0.282	5.47E-35	3.55E-38	16.9549108	37.44918761	black
SFR1	2.42E-39	0.875017159	0.207	0.05	5.47E-35	3.55E-38	32.76868174	37.44918761	black
DIP2B	2.81E-39	0.510123158	0.731	0.408	6.36E-35	4.12E-38	19.07077659	37.38465168	black
GRID2	2.84E-39	-0.500991584	0.982	0.966	6.42E-35	4.16E-38	18.72775911	37.38138469	black
ZMAT2	2.91E-39	0.837287314	0.263	0.08	6.57E-35	4.25E-38	31.2909645	37.37183635	black
FKBP4	3.01E-39	0.583277699	0.349	0.126	6.81E-35	4.39E-38	21.78956721	37.35710663	black
TIGD2	3.20E-39	0.525221653	0.326	0.112	7.23E-35	4.65E-38	19.6076664	37.33217451	black
EEFSEC	3.32E-39	0.623107884	0.361	0.136	7.50E-35	4.82E-38	23.25241493	37.31683631	black
NEDD8	3.37E-39	0.584506301	0.396	0.156	7.62E-35	4.89E-38	21.80830575	37.31064272	black
PGAM5	3.42E-39	0.864803493	0.248	0.072	7.72E-35	4.95E-38	32.26188994	37.30545748	black
UQCR11	6.39E-39	0.615822178	0.338	0.123	1.45E-34	9.24E-38	22.80648894	37.03421176	black
TSPAN5	6.65E-39	0.570441761	0.71	0.401	1.50E-34	9.60E-38	21.11648667	37.01777834	black
CAMK2N2	7.26E-39	0.612880078	0.319	0.112	1.64E-34	1.05E-37	22.66466059	36.98057973	black
ANAPC5	7.31E-39	0.48439129	0.584	0.277	1.65E-34	1.05E-37	17.91201294	36.97839602	black
ADIPOR1	7.67E-39	0.670161466	0.29	0.095	1.73E-34	1.10E-37	24.76789498	36.95810076	black
ACTB	8.26E-39	0.448392312	0.773	0.427	1.87E-34	1.18E-37	16.55751833	36.92640991	black
BBIP1	1.06E-38	0.559893443	0.446	0.191	2.39E-34	1.52E-37	20.6148928	36.81931458	black
DPP10	1.27E-38	-0.81909949	0.881	0.886	2.88E-34	1.82E-37	30.09387204	36.74019139	black
TAL1	1.29E-38	0.635615775	0.318	0.111	2.92E-34	1.84E-37	23.34933892	36.73498967	black
STMN4	1.30E-38	0.588271372	0.44	0.188	2.95E-34	1.86E-37	21.60807716	36.73147837	black
D330023K18RIK	1.31E-38	0.702436644	0.268	0.083	2.97E-34	1.87E-37	25.79980133	36.7290083	black
VAMP4	1.34E-38	0.475997658	0.504	0.224	3.02E-34	1.90E-37	17.47965608	36.72214719	black
ZFP397	1.53E-38	0.697984654	0.298	0.1	3.47E-34	2.17E-37	25.59040584	36.66327861	black
RPL36A	1.54E-38	0.628284877	0.352	0.131	3.47E-34	2.17E-37	23.0349835	36.66327861	black
DDX18	1.63E-38	0.721175215	0.274	0.087	3.68E-34	2.30E-37	26.42257931	36.63822433	black
MFSD4A	1.71E-38	0.808576951	0.297	0.101	3.87E-34	2.41E-37	29.60834727	36.61784722	black
TCP1	1.75E-38	0.498723171	0.305	0.102	3.96E-34	2.46E-37	18.25745659	36.60839853	black
2-Mar	1.75E-38	0.659921539	0.441	0.191	3.96E-34	2.46E-37	24.15867071	36.60839853	black
SLC43A2	1.77E-38	0.546327429	0.38	0.147	4.00E-34	2.48E-37	19.99831313	36.60499557	black
CHUK	1.90E-38	0.493978069	0.521	0.235	4.29E-34	2.66E-37	18.06768532	36.57588557	black
GM42851	1.92E-38	0.899338929	0.173	0.034	4.33E-34	2.68E-37	32.89078056	36.57217484	black
PSMC5	1.98E-38	0.716760069	0.313	0.11	4.47E-34	2.76E-37	26.20394187	36.55887513	black
GPKOW	2.16E-38	0.640359403	0.23	0.062	4.87E-34	3.00E-37	23.38731341	36.52216754	black
TSNAX	3.16E-38	0.622423475	0.327	0.117	7.14E-34	4.40E-37	22.62943388	36.35697366	black
TGS1	3.59E-38	0.541616096	0.383	0.15	8.12E-34	4.99E-37	19.66181329	36.30212143	black
POMP	3.83E-38	0.813977477	0.265	0.083	8.65E-34	5.31E-37	29.52727575	36.27529826	black
KCNJ9	4.57E-38	0.833421439	0.279	0.092	1.03E-33	6.33E-37	30.16860766	36.19850206	black
NDUFA1	4.62E-38	0.754934727	0.244	0.072	1.04E-33	6.39E-37	27.32471594	36.19480593	black
IFT52	4.89E-38	0.655880065	0.333	0.122	1.11E-33	6.75E-37	23.7234974	36.17048097	black
PLPBP	5.26E-38	0.644587124	0.299	0.102	1.19E-33	7.25E-37	23.29534937	36.13995457	black
ASAP2	5.49E-38	0.568609052	0.514	0.24	1.24E-33	7.55E-37	20.53942681	36.12222977	black
TIMM8B	5.54E-38	0.715215242	0.286	0.094	1.25E-33	7.61E-37	25.83271808	36.11880249	black
ITM2C	6.14E-38	0.521625195	0.746	0.416	1.39E-33	8.42E-37	18.81739285	36.07454746	black
AKAP8	6.54E-38	0.459198125	0.548	0.256	1.48E-33	8.95E-37	16.55315114	36.04795019	black
TBCB	6.60E-38	0.573333562	0.282	0.09	1.49E-33	9.02E-37	20.66580216	36.04498942	black
ADGRL3	7.37E-38	-0.466296822	0.981	0.957	1.67E-33	1.01E-36	16.78561787	35.99771024	black
SLC6A6	7.51E-38	0.480192532	0.59	0.286	1.70E-33	1.02E-36	17.28229004	35.99033492	black
RBIS	7.66E-38	0.592726553	0.461	0.203	1.73E-33	1.04E-36	21.32766132	35.98229436	black
THAP4	8.01E-38	0.733267341	0.252	0.076	1.81E-33	1.09E-36	26.37080231	35.96342129	black
MRPL19	8.15E-38	0.99414014	0.173	0.035	1.84E-33	1.10E-36	35.74623738	35.95694	black
CRTC3	9.23E-38	0.429434759	0.548	0.254	2.09E-33	1.25E-36	15.41821175	35.90350204	black
TMED4	9.36E-38	0.618420024	0.338	0.124	2.11E-33	1.26E-36	22.20018823	35.89823642	black
TRAM1L1	9.62E-38	0.685627519	0.271	0.085	2.17E-33	1.30E-36	24.60507254	35.88693841	black
PMS2	9.91E-38	0.721233604	0.262	0.082	2.24E-33	1.33E-36	25.8742761	35.87502852	black
X2210016L21RIK	9.92E-38	0.507977593	0.425	0.178	2.24E-33	1.33E-36	18.22371063	35.87502852	black
TEX261	9.97E-38	0.851852835	0.199	0.048	2.25E-33	1.34E-36	30.55880458	35.87333791	black
RNF115	1.10E-37	0.56279114	0.383	0.152	2.49E-33	1.47E-36	20.16568419	35.83155944	black
TOMM20	1.13E-37	0.586019951	0.451	0.196	2.57E-33	1.52E-36	20.99035185	35.81849359	black
SUMO2	1.15E-37	0.613656929	0.412	0.172	2.59E-33	1.53E-36	21.97822459	35.81516567	black
VMP1	1.15E-37	0.517734518	0.676	0.361	2.60E-33	1.53E-36	18.54223037	35.81416679	black
COTL1	1.16E-37	0.886978159	0.212	0.055	2.62E-33	1.55E-36	31.76352065	35.8109389	black
URGCP	1.33E-37	0.521853559	0.59	0.286	3.01E-33	1.77E-36	18.6575145	35.75239487	black
MYCBP	1.34E-37	0.781420251	0.234	0.066	3.02E-33	1.77E-36	27.93647135	35.75089243	black
RMDN1	1.34E-37	0.515168586	0.774	0.453	3.03E-33	1.78E-36	18.41757034	35.7505695	black
USP20	1.39E-37	0.533714187	0.377	0.147	3.15E-33	1.84E-36	19.07182685	35.73415757	black
NRIP1	1.42E-37	0.60601267	0.44	0.19	3.20E-33	1.87E-36	21.65141094	35.7276539	black
DYNC1LI2	1.55E-37	0.543795163	0.473	0.207	3.51E-33	2.05E-36	19.40746223	35.68892029	black
RNF152	2.11E-37	0.544354521	0.497	0.231	4.77E-33	2.78E-36	19.35510465	35.55606484	black
TET3	2.12E-37	0.569778321	0.505	0.234	4.79E-33	2.79E-36	20.25855033	35.55514412	black
NLE1	2.19E-37	0.940050144	0.17	0.034	4.94E-33	2.87E-36	33.41123997	35.54197633	black
PIGP	2.29E-37	0.825499831	0.225	0.062	5.17E-33	3.00E-36	29.32420144	35.5229648	black
NDUFS6	2.53E-37	0.90229543	0.239	0.071	5.71E-33	3.31E-36	32.01378988	35.48038571	black
GOT2	2.57E-37	0.514503187	0.48	0.214	5.80E-33	3.36E-36	18.25153043	35.47408628	black
NBEA	2.64E-37	-0.462557832	0.957	0.922	5.98E-33	3.45E-36	16.40317668	35.46189369	black
STK19	3.17E-37	0.597609755	0.334	0.124	7.17E-33	4.13E-36	21.14565817	35.38372326	black
PRAF2	3.42E-37	0.66279705	0.278	0.09	7.73E-33	4.45E-36	23.43092486	35.35158288	black
ARL2	3.60E-37	0.684143698	0.266	0.085	8.14E-33	4.68E-36	24.17084415	35.33006913	black
MRPL43	3.86E-37	0.7401715	0.219	0.059	8.72E-33	5.00E-36	26.12863394	35.30078356	black
CLPP	3.88E-37	0.460184336	0.579	0.281	8.77E-33	5.03E-36	16.24388332	35.29864457	black
SNAP25	4.09E-37	0.371913573	0.985	0.882	9.24E-33	5.29E-36	13.11990463	35.27675674	black
PSMB1	4.23E-37	0.54221959	0.386	0.154	9.57E-33	5.47E-36	19.11990878	35.26229805	black
RTF1	4.68E-37	0.441552223	0.558	0.261	1.06E-32	6.03E-36	15.55132131	35.21966488	black
DYNLT1B	5.10E-37	0.867188656	0.188	0.043	1.15E-32	6.57E-36	30.50973254	35.1823474	black
TM2D1	5.20E-37	0.566148278	0.358	0.138	1.18E-32	6.69E-36	19.91401625	35.17455942	black
UBXN2A	5.42E-37	0.677742689	0.272	0.089	1.23E-32	6.96E-36	23.82765944	35.15738324	black
PARP2	5.48E-37	0.701468828	0.237	0.068	1.24E-32	7.03E-36	24.65876845	35.15304953	black
SGK1	5.72E-37	0.630365412	0.495	0.235	1.29E-32	7.31E-36	22.14842589	35.13585213	black
TM2D2	6.11E-37	0.82864927	0.231	0.066	1.38E-32	7.81E-36	29.09189356	35.1076078	black
ABHD6	6.38E-37	0.52021797	0.435	0.188	1.44E-32	8.14E-36	18.25401787	35.08917206	black
TMEM186	6.72E-37	0.606344351	0.309	0.109	1.52E-32	8.56E-36	21.26306672	35.06764214	black
HBEGF	6.85E-37	1.119838707	0.132	0.018	1.55E-32	8.72E-36	39.26122657	35.05971557	red
GOT1	7.26E-37	0.533085021	0.435	0.188	1.64E-32	9.23E-36	18.67659987	35.03493649	black
YWHAQ	8.25E-37	0.539612771	0.456	0.202	1.86E-32	1.05E-35	18.87590867	34.9804706	black
GM37240	8.49E-37	0.728843089	0.282	0.094	1.92E-32	1.08E-35	25.48653177	34.96847561	black
BCS1L	1.07E-36	0.852493871	0.19	0.045	2.42E-32	1.35E-35	29.72575989	34.86917724	black
EIF2B3	1.33E-36	0.595683353	0.302	0.105	3.01E-32	1.68E-35	20.71435856	34.77411021	black
SLC3A2	1.42E-36	0.543040588	0.413	0.174	3.21E-32	1.79E-35	18.86940552	34.74768908	black
LRP1B	1.47E-36	-0.61636969	0.974	0.957	3.32E-32	1.85E-35	21.40862143	34.73341046	black
RNF6	1.53E-36	1.025172709	0.167	0.034	3.46E-32	1.93E-35	35.58934596	34.71546368	red
RAB6B	1.76E-36	0.474395096	0.538	0.255	3.98E-32	2.21E-35	16.44062343	34.65597259	black
ZFP74	1.94E-36	0.755865093	0.291	0.102	4.39E-32	2.43E-35	26.16323433	34.61362958	black
RPS20	2.00E-36	0.564024337	0.354	0.139	4.51E-32	2.50E-35	19.51668713	34.60256205	black
ITFG2	2.35E-36	0.559821332	0.353	0.136	5.32E-32	2.94E-35	19.3313988	34.53137221	black
ATP5E	2.96E-36	0.645224104	0.309	0.111	6.69E-32	3.70E-35	22.21660459	34.43238471	black
D130017N08RIK	3.11E-36	0.863693385	0.191	0.046	7.03E-32	3.87E-35	29.72137317	34.41194952	black
CTNNA3	3.73E-36	0.55406414	0.483	0.219	8.44E-32	4.64E-35	19.02305501	34.33366938	black
PTPRA	3.73E-36	0.446972205	0.519	0.241	8.44E-32	4.64E-35	15.34619592	34.33366938	black
CDK8	3.77E-36	0.536107002	0.53	0.257	8.52E-32	4.68E-35	18.40465066	34.33018143	black
WDR47	3.82E-36	0.450926812	0.535	0.246	8.63E-32	4.73E-35	15.47812363	34.32513483	black
TELO2	3.85E-36	0.684577235	0.245	0.075	8.71E-32	4.77E-35	23.49588148	34.32173944	black
ABHD16A	4.55E-36	0.52246962	0.422	0.179	1.03E-31	5.62E-35	17.89463364	34.25009408	black
HK1	4.60E-36	0.476810616	0.467	0.207	1.04E-31	5.68E-35	16.32875304	34.2457833	black
PDIA6	4.64E-36	0.623254665	0.363	0.144	1.05E-31	5.72E-35	21.34193702	34.24272325	black
SRSF7	5.00E-36	0.477763962	0.619	0.314	1.13E-31	6.15E-35	16.34487746	34.21119791	black
RTCA	5.22E-36	0.586219302	0.347	0.133	1.18E-31	6.41E-35	20.0448026	34.19335139	black
HSPE1	5.27E-36	0.657192476	0.259	0.083	1.19E-31	6.46E-35	22.46932322	34.18986682	black
GM10827	5.38E-36	1.045312511	0.159	0.031	1.22E-31	6.58E-35	35.73034253	34.18149325	red
COG4	5.54E-36	0.619627864	0.368	0.147	1.25E-31	6.78E-35	21.17203529	34.16895285	black
CLU	5.62E-36	0.537062343	0.492	0.227	1.27E-31	6.86E-35	18.34809212	34.16380308	black
MAP2	5.66E-36	-0.484089851	0.946	0.895	1.28E-31	6.90E-35	16.53691629	34.16084071	black
CCDC47	5.73E-36	0.530289491	0.449	0.198	1.29E-31	6.97E-35	18.11296523	34.15674938	black
PDCD6	5.83E-36	0.780635965	0.211	0.057	1.32E-31	7.08E-35	26.65864154	34.14990181	black
CDC42EP3	6.78E-36	0.881848456	0.197	0.05	1.53E-31	8.23E-35	30.05759227	34.08475921	black
RPL22L1	6.88E-36	0.536951107	0.469	0.208	1.55E-31	8.34E-35	18.29878882	34.07905968	black
CEP78	7.08E-36	0.650556884	0.28	0.096	1.60E-31	8.57E-35	22.16239218	34.06680141	black
PPP1R14A	7.77E-36	1.11540496	0.14	0.022	1.76E-31	9.39E-35	37.95414155	34.02723039	red
HIGD1A	8.20E-36	0.664998245	0.313	0.114	1.85E-31	9.90E-35	22.6128695	34.0044048	black
FOXK1	8.73E-36	0.812656201	0.217	0.06	1.97E-31	1.05E-34	27.61245347	33.97802593	black
XNDC1	9.58E-36	0.740276432	0.245	0.076	2.17E-31	1.15E-34	25.12358184	33.93810845	black
ARFGAP3	9.83E-36	0.72273778	0.239	0.072	2.22E-31	1.18E-34	24.52072119	33.92754867	black
BBS5	1.09E-35	0.675879881	0.317	0.118	2.47E-31	1.31E-34	22.90007213	33.88186684	black
ARXES2	1.10E-35	0.667689949	0.311	0.113	2.49E-31	1.32E-34	22.62050616	33.87875795	black
SH3BP5	1.19E-35	0.750061674	0.279	0.096	2.70E-31	1.43E-34	25.38612773	33.84538713	black
SMC3	1.30E-35	0.490467461	0.44	0.189	2.93E-31	1.55E-34	16.58265201	33.80989224	black
PPP2R5C	1.32E-35	0.466251051	0.604	0.305	2.98E-31	1.57E-34	15.76079761	33.80324306	black
ACAT1	1.33E-35	0.471571306	0.595	0.302	3.00E-31	1.58E-34	15.93940262	33.80062023	black
LRRC59	1.38E-35	0.843490535	0.176	0.039	3.12E-31	1.64E-34	28.49750643	33.78521187	black
PNOC	1.46E-35	0.918869983	0.272	0.095	3.29E-31	1.73E-34	31.02277409	33.76187565	black
EPN2	1.60E-35	0.557658056	0.402	0.172	3.63E-31	1.90E-34	18.80452406	33.72052792	black
MICAL2	1.62E-35	0.562277346	0.355	0.141	3.65E-31	1.92E-34	18.95871779	33.71773364	black
SNHG20	1.74E-35	-1.128456694	0.5	0.559	3.94E-31	2.06E-34	38.01227971	33.6851914	blue
GPRC5B	1.83E-35	0.809926953	0.232	0.07	4.14E-31	2.17E-34	27.26572343	33.66442284	black
PHF20	1.94E-35	0.473930871	0.424	0.18	4.38E-31	2.29E-34	15.94353082	33.64104722	black
TMEM60	2.08E-35	0.794317012	0.241	0.075	4.69E-31	2.45E-34	26.69828435	33.6116235	black
GSTM5	2.19E-35	0.836738367	0.22	0.063	4.96E-31	2.58E-34	28.10435674	33.58798623	black
CAPN2	2.28E-35	0.580138794	0.38	0.156	5.15E-31	2.68E-34	19.4767833	33.57262693	black
GNG11	2.40E-35	1.15854985	0.109	0.01	5.43E-31	2.82E-34	38.86954596	33.55017134	red
MAP1LC3A	2.67E-35	0.583910525	0.377	0.154	6.03E-31	3.13E-34	19.5638421	33.50486293	black
MPPED2	2.92E-35	0.561625693	0.634	0.356	6.59E-31	3.41E-34	18.7959683	33.4670734	black
INSIG2	3.16E-35	0.535800183	0.371	0.149	7.15E-31	3.70E-34	17.91302906	33.43229364	black
CNOT8	3.18E-35	0.836273574	0.187	0.046	7.18E-31	3.71E-34	27.95742719	33.43095853	black
RSKR	3.33E-35	0.792515378	0.328	0.13	7.54E-31	3.89E-34	26.47839457	33.41057512	black
TM7SF3	3.65E-35	0.743015513	0.205	0.054	8.24E-31	4.24E-34	24.79612098	33.37227896	black
PGRMC1	3.84E-35	0.477162101	0.664	0.36	8.67E-31	4.46E-34	15.91375381	33.35083355	black
SAT2	3.86E-35	0.91762404	0.184	0.044	8.73E-31	4.48E-34	30.60122647	33.34832692	black
ATP5C1	4.21E-35	0.562809078	0.426	0.186	9.51E-31	4.88E-34	18.74826262	33.3119407	black
RPS3A1	4.24E-35	0.443408838	0.405	0.168	9.58E-31	4.90E-34	14.7697258	33.30949801	black
MED21	4.71E-35	0.927977862	0.175	0.04	1.06E-30	5.44E-34	30.86862039	33.26439311	black
DDX1	4.74E-35	0.612237789	0.345	0.134	1.07E-30	5.47E-34	20.36406808	33.2616974	black
USO1	4.85E-35	0.492150797	0.397	0.163	1.10E-30	5.59E-34	16.3653905	33.25279692	black
RCN2	5.08E-35	0.480216949	0.467	0.212	1.15E-30	5.85E-34	15.95890192	33.2326919	black
SORCS2	5.67E-35	0.791210357	0.318	0.125	1.28E-30	6.52E-34	26.2569474	33.1857984	black
BOD1L	5.97E-35	0.402007198	0.575	0.286	1.35E-30	6.85E-34	13.33225717	33.16422499	black
DNAJA1	6.38E-35	0.532205362	0.439	0.195	1.44E-30	7.31E-34	17.63510626	33.1359049	black
NUDT5	6.39E-35	0.674411116	0.254	0.081	1.44E-30	7.31E-34	22.34722262	33.1359049	black
ATP5MPL	6.77E-35	0.478964174	0.446	0.197	1.53E-30	7.73E-34	15.85924309	33.11154352	black
ATP2B3	6.87E-35	0.490163952	0.497	0.232	1.55E-30	7.85E-34	16.22702739	33.10530553	black
NEMF	7.16E-35	0.431948278	0.669	0.348	1.62E-30	8.17E-34	14.29226717	33.08791333	black
NDUFB1.PS	7.55E-35	0.534011039	0.448	0.201	1.71E-30	8.60E-34	17.65739878	33.06560633	black
ITGB1	7.73E-35	0.528823496	0.433	0.189	1.75E-30	8.79E-34	17.48089197	33.05619377	black
SOX14	7.90E-35	0.998955206	0.162	0.034	1.79E-30	8.98E-34	33.01238808	33.0469153	black
PNKP	8.26E-35	0.61320455	0.284	0.099	1.87E-30	9.37E-34	20.2531683	33.0284051	black
TXN1	9.15E-35	0.784386079	0.206	0.055	2.07E-30	1.04E-33	25.87248248	32.98437231	black
CFL2	9.36E-35	0.656166679	0.315	0.119	2.12E-30	1.06E-33	21.63714777	32.97507854	black
IGSF3	1.07E-34	0.56504741	0.421	0.185	2.42E-30	1.21E-33	18.60041895	32.91833326	black
RPL32	1.14E-34	0.527237564	0.472	0.213	2.57E-30	1.28E-33	17.34215905	32.89249522	black
LINGO1	1.19E-34	0.476329776	0.475	0.218	2.69E-30	1.34E-33	15.65835743	32.87293429	black
AKAP9	1.24E-34	0.440303164	0.838	0.516	2.80E-30	1.40E-33	14.46624831	32.85519956	black
DLD	1.39E-34	0.571539618	0.345	0.136	3.13E-30	1.56E-33	18.75077424	32.80747941	black
MRPS33	1.40E-34	0.736513977	0.244	0.077	3.17E-30	1.57E-33	24.16009698	32.80331093	black
ANAPC16	1.52E-34	0.775337065	0.258	0.086	3.44E-30	1.70E-33	25.40648521	32.76830989	black
C78859	1.53E-34	0.523758812	0.459	0.21	3.46E-30	1.71E-33	17.16147346	32.76598516	black
ACSL1	1.57E-34	0.464459666	0.359	0.144	3.55E-30	1.76E-33	15.21357823	32.75543462	black
CSPG5	1.60E-34	0.493212298	0.647	0.347	3.61E-30	1.78E-33	16.15202976	32.74863547	black
SDF2	1.65E-34	0.523441981	0.383	0.158	3.74E-30	1.84E-33	17.13458603	32.73445128	black
HDAC1	1.66E-34	0.629108185	0.285	0.1	3.76E-30	1.85E-33	20.59225352	32.73245207	black
ZFP266	1.67E-34	0.464198159	0.454	0.199	3.79E-30	1.86E-33	15.19324494	32.73008444	black
MAT2A	1.87E-34	0.43337884	0.846	0.532	4.22E-30	2.07E-33	14.1642469	32.68329138	black
NDUFA12	1.93E-34	0.505509655	0.382	0.158	4.36E-30	2.14E-33	16.51512947	32.67025524	black
X2610035D17RIK	2.02E-34	0.629692807	0.331	0.13	4.57E-30	2.24E-33	20.55915152	32.64949398	black
ARFGAP1	2.06E-34	0.556316813	0.361	0.146	4.66E-30	2.28E-33	18.15939499	32.6421826	black
MYO1C	2.11E-34	0.778869731	0.192	0.049	4.76E-30	2.33E-33	25.41689054	32.63304442	black
COX7A2	2.20E-34	0.510628325	0.486	0.224	4.98E-30	2.43E-33	16.65371877	32.61416952	black
VPS29	2.27E-34	0.63495933	0.252	0.081	5.12E-30	2.50E-33	20.70129405	32.60255116	black
ATP6V0B	2.33E-34	0.422131341	0.898	0.623	5.27E-30	2.57E-33	13.75749473	32.5905551	black
DDRGK1	2.42E-34	0.507848799	0.432	0.19	5.46E-30	2.65E-33	16.54371553	32.57606509	black
SUCLA2	2.66E-34	0.561843052	0.34	0.133	6.01E-30	2.92E-33	18.27947213	32.53483704	black
X2310033P09RIK	2.96E-34	0.825365668	0.221	0.066	6.69E-30	3.25E-33	26.81508242	32.48873008	black
PRKCA	3.22E-34	0.534479523	0.529	0.27	7.27E-30	3.52E-33	17.34558148	32.45321986	black
ERLEC1	3.28E-34	0.478335827	0.497	0.232	7.42E-30	3.59E-33	15.51964887	32.44508984	black
LNCPINT	3.80E-34	0.429818889	0.881	0.596	8.59E-30	4.15E-33	13.9183983	32.38200703	black
COMT	3.89E-34	0.381320786	0.47	0.212	8.80E-30	4.25E-33	12.344134	32.37204593	black
DSCAM	3.91E-34	-0.358058535	0.993	0.974	8.83E-30	4.25E-33	11.59080947	32.37126985	black
UBE2S	3.92E-34	0.630467274	0.29	0.104	8.86E-30	4.26E-33	20.40844967	32.37035531	black
GPATCH8	4.77E-34	0.398865711	0.935	0.702	1.08E-29	5.18E-33	12.87778029	32.28600489	black
MIGA1	5.09E-34	0.529950011	0.437	0.195	1.15E-29	5.52E-33	17.09530789	32.25834049	black
NDUFB11	5.27E-34	0.508073092	0.312	0.115	1.19E-29	5.71E-33	16.38185619	32.24310924	black
ZKSCAN1	5.43E-34	0.657865083	0.283	0.1	1.23E-29	5.88E-33	21.20355594	32.23085779	black
ZFP335OS	5.71E-34	0.730908634	0.244	0.078	1.29E-29	6.17E-33	23.54240813	32.20978248	black
TMEM237	5.94E-34	0.739114682	0.238	0.076	1.34E-29	6.41E-33	23.7943724	32.19307228	black
KCNN3	6.18E-34	0.732947121	0.232	0.072	1.40E-29	6.66E-33	23.5838385	32.17672573	black
MPC1	6.33E-34	0.5037994	0.581	0.297	1.43E-29	6.81E-33	16.20551466	32.16660172	black
RBM26	6.39E-34	-0.96020596	0.601	0.621	1.44E-29	6.87E-33	30.8830018	32.16289327	black
SUGP1	6.82E-34	0.445674441	0.433	0.19	1.54E-29	7.32E-33	14.32201107	32.13558987	black
ATP6V1D	6.92E-34	0.509413767	0.446	0.201	1.56E-29	7.42E-33	16.36712956	32.12934281	black
ZMIZ1	7.69E-34	0.52431377	0.402	0.174	1.74E-29	8.24E-33	16.82214143	32.08411147	black
FOXN3	8.43E-34	0.442516092	0.804	0.5	1.91E-29	9.02E-33	14.18039679	32.0449291	black
MICAL3	1.04E-33	0.400956466	0.797	0.468	2.35E-29	1.11E-32	12.81208523	31.95380624	black
GPX4	1.06E-33	0.354792082	0.481	0.217	2.40E-29	1.13E-32	11.33414255	31.94587236	black
NDFIP2	1.07E-33	0.473814578	0.543	0.265	2.42E-29	1.14E-32	15.13469828	31.94223859	black
DUSP12	1.10E-33	0.613870041	0.236	0.073	2.49E-29	1.17E-32	19.60097423	31.93016912	black
ZBTB38	1.13E-33	0.421584935	0.579	0.284	2.56E-29	1.21E-32	13.45657174	31.91900524	black
PNPLA3	1.15E-33	0.876127112	0.184	0.047	2.59E-29	1.22E-32	27.96140431	31.91478032	black
MANBAL	1.15E-33	0.706323696	0.244	0.078	2.61E-29	1.22E-32	22.54066307	31.91265309	black
YWHAE	1.19E-33	0.408221147	0.63	0.324	2.70E-29	1.26E-32	13.02158036	31.89834835	black
TLN2	1.22E-33	0.429577717	0.66	0.354	2.75E-29	1.29E-32	13.69944222	31.8904861	black
DDX3Y	1.31E-33	0.47271489	0.519	0.246	2.96E-29	1.38E-32	15.06055198	31.8596945	black
EEF1B2	1.34E-33	0.591954253	0.281	0.099	3.03E-29	1.42E-32	18.85315948	31.84901429	black
CRYZL1	1.36E-33	0.453126074	0.514	0.248	3.08E-29	1.43E-32	14.42898359	31.84319861	black
ZFP182	1.47E-33	0.55474526	0.372	0.155	3.32E-29	1.54E-32	17.64718509	31.81133103	black
KLHL33	1.67E-33	0.517417776	0.356	0.145	3.78E-29	1.76E-32	16.43057372	31.75494634	black
FAF2	1.74E-33	0.441662208	0.457	0.204	3.94E-29	1.83E-32	14.01748922	31.73803184	black
KTN1	1.86E-33	0.417047844	0.852	0.546	4.20E-29	1.95E-32	13.22467451	31.71020953	black
INTS10	1.89E-33	0.444331837	0.469	0.215	4.28E-29	1.98E-32	14.08650935	31.70267845	black
HIVEP2	1.96E-33	0.428836234	0.877	0.617	4.43E-29	2.05E-32	13.58903924	31.68817877	black
RGS10	2.26E-33	0.928836026	0.17	0.04	5.11E-29	2.36E-32	29.376079	31.62676531	black
BEX3	2.27E-33	0.385066615	0.435	0.192	5.13E-29	2.37E-32	12.17781447	31.62521493	black
LIMK2	2.49E-33	0.455103013	0.459	0.209	5.63E-29	2.60E-32	14.37479431	31.58580341	black
UGDH	2.81E-33	0.460909072	0.352	0.141	6.34E-29	2.92E-32	14.53453353	31.53449217	black
AIMP1	2.82E-33	0.689171952	0.27	0.095	6.37E-29	2.93E-32	21.73194715	31.53341788	black
MEST	2.87E-33	0.801453883	0.198	0.054	6.48E-29	2.98E-32	25.26687819	31.5263033	black
PDIA3	3.18E-33	0.452786941	0.366	0.15	7.18E-29	3.29E-32	14.25476958	31.48228958	black
MANF	3.32E-33	0.555563484	0.349	0.141	7.51E-29	3.44E-32	17.47983194	31.46324847	black
RBX1	3.47E-33	0.459732267	0.432	0.193	7.84E-29	3.59E-32	14.45623846	31.44490716	black
NDUFA5	4.55E-33	0.473088731	0.443	0.2	1.03E-28	4.70E-32	14.82087584	31.3278987	black
GGPS1	5.12E-33	0.378332453	0.583	0.291	1.16E-28	5.28E-32	11.83320425	31.27726459	black
NCAPD3	5.13E-33	0.542974073	0.369	0.154	1.16E-28	5.29E-32	16.98236441	31.27656597	black
SLC38A9	5.29E-33	0.365114725	0.598	0.304	1.20E-28	5.44E-32	11.41498901	31.26411574	black
CPEB3	5.32E-33	0.413365567	0.931	0.701	1.20E-28	5.47E-32	12.92275207	31.26228475	black
SMAD1	5.65E-33	0.589865121	0.361	0.153	1.28E-28	5.80E-32	18.42545802	31.23673086	black
FGFBP3	6.27E-33	1.064301882	0.102	0.009	1.42E-28	6.43E-32	33.19773022	31.19202434	red
INTS9	6.75E-33	0.559422634	0.281	0.101	1.53E-28	6.91E-32	17.43179701	31.16033556	black
OSBPL10	6.84E-33	0.588627165	0.353	0.146	1.55E-28	7.00E-32	18.33870766	31.15504814	black
CASTOR2	6.89E-33	0.455806012	0.477	0.227	1.56E-28	7.04E-32	14.19956813	31.15265652	black
EIF4H	7.50E-33	0.452043347	0.373	0.154	1.70E-28	7.65E-32	14.06581861	31.11608364	black
RNF149	8.79E-33	0.765153698	0.222	0.068	1.99E-28	8.97E-32	23.75604303	31.04741322	black
RRNAD1	8.90E-33	0.40594183	0.437	0.196	2.01E-28	9.07E-32	12.6014623	31.04253213	black
NEFL	9.59E-33	0.552545732	0.307	0.117	2.17E-28	9.76E-32	17.13481766	31.0106778	black
PSMA7	9.71E-33	0.373193323	0.406	0.173	2.20E-28	9.87E-32	11.5711924	31.00589341	black
TBL3	1.06E-32	0.64750877	0.231	0.073	2.39E-28	1.07E-31	20.05341364	30.97010353	black
RIMS1	1.32E-32	-0.426573053	0.958	0.927	2.98E-28	1.34E-31	13.17002438	30.87401864	black
ZCCHC9	1.43E-32	0.632114606	0.282	0.104	3.22E-28	1.44E-31	19.49497141	30.84088112	black
ZCCHC14	1.43E-32	0.465567263	0.402	0.175	3.23E-28	1.44E-31	14.35820563	30.84023891	black
ASPH	1.66E-32	0.40780992	0.475	0.224	3.76E-28	1.68E-31	12.55023831	30.77472542	black
ALKBH1	1.68E-32	0.65327291	0.282	0.103	3.79E-28	1.69E-31	20.10248921	30.7719621	black
LRP8	1.84E-32	0.452349027	0.388	0.164	4.16E-28	1.85E-31	13.90174976	30.73235249	black
PRDX1	1.89E-32	0.636982192	0.26	0.09	4.27E-28	1.90E-31	19.56901797	30.72145223	black
FBXO9	1.99E-32	0.565085554	0.267	0.094	4.50E-28	2.00E-31	17.34759603	30.69906122	black
RHOQ	1.99E-32	0.685839581	0.272	0.098	4.51E-28	2.00E-31	21.05431498	30.69860004	black
ZADH2	2.12E-32	0.802641613	0.183	0.048	4.78E-28	2.12E-31	24.61957397	30.67318413	black
LGMN	2.17E-32	0.483023899	0.455	0.211	4.91E-28	2.17E-31	14.81082001	30.6627064	black
ID2	2.22E-32	0.964311306	0.154	0.034	5.03E-28	2.22E-31	29.55893888	30.65290089	black
NDUFA9	2.35E-32	0.681043001	0.234	0.076	5.31E-28	2.35E-31	20.85983949	30.62925463	black
NIPSNAP2	2.40E-32	0.404345115	0.436	0.195	5.42E-28	2.39E-31	12.38145429	30.62100624	black
RWDD3	2.72E-32	0.923398695	0.125	0.02	6.16E-28	2.71E-31	28.22490855	30.56632925	black
WDFY1	2.83E-32	0.552959386	0.328	0.13	6.40E-28	2.82E-31	16.89274686	30.54970635	black
GNAO1	2.93E-32	0.437142236	0.757	0.442	6.61E-28	2.91E-31	13.34867624	30.53623083	black
NAPB	3.06E-32	0.384051155	0.618	0.323	6.92E-28	3.04E-31	11.7201482	30.51715386	black
SSR2	3.21E-32	0.600926976	0.292	0.108	7.26E-28	3.19E-31	18.32637247	30.49683775	black
SMS	3.21E-32	0.486159946	0.538	0.269	7.27E-28	3.19E-31	14.82632622	30.49680734	black
NDUFAB1	3.23E-32	0.588160803	0.339	0.138	7.29E-28	3.19E-31	17.93641777	30.49577206	black
ZFP692	3.31E-32	0.410722886	0.579	0.292	7.47E-28	3.27E-31	12.52113597	30.48560572	black
NOVA2	3.34E-32	0.484097295	0.406	0.178	7.54E-28	3.29E-31	14.75643317	30.48237063	black
CTR9	3.39E-32	0.611025618	0.257	0.089	7.67E-28	3.35E-31	18.62134511	30.47555545	black
TVP23B	3.56E-32	0.669076403	0.212	0.063	8.05E-28	3.51E-31	20.37651529	30.45469125	black
PEG3	3.64E-32	-0.645825278	0.816	0.754	8.23E-28	3.58E-31	19.66279057	30.44599095	black
TAOK3	3.93E-32	0.439410939	0.47	0.221	8.88E-28	3.86E-31	13.36393704	30.41330075	black
ANP32A	4.27E-32	0.529449221	0.295	0.11	9.65E-28	4.19E-31	16.08337259	30.37755456	black
CORO2B	4.81E-32	0.523048739	0.317	0.125	1.09E-27	4.71E-31	15.86236083	30.32673564	black
TRP53INP2	4.88E-32	0.624442669	0.246	0.082	1.10E-27	4.78E-31	18.93333914	30.32038019	black
MRPL20	5.03E-32	0.796500075	0.186	0.049	1.14E-27	4.92E-31	24.14039512	30.30808893	black
ZRANB2	5.11E-32	0.414473878	0.83	0.54	1.15E-27	4.99E-31	12.5593436	30.30189422	black
KIF5C	5.20E-32	0.431267145	0.73	0.406	1.18E-27	5.08E-31	13.06501018	30.29447137	black
NRGN	5.28E-32	0.767261372	0.149	0.031	1.19E-27	5.15E-31	23.2388436	30.28804063	black
SELENOS	5.35E-32	0.670487415	0.26	0.092	1.21E-27	5.21E-31	20.30439511	30.28303684	black
HMGB1	5.37E-32	0.418669136	0.433	0.198	1.21E-27	5.22E-31	12.67828502	30.2823493	black
DFFA	5.38E-32	0.760987968	0.191	0.053	1.22E-27	5.22E-31	23.04423534	30.28199697	black
LRRC58	5.70E-32	0.458861912	0.376	0.159	1.29E-27	5.53E-31	13.88373351	30.25688807	black
BSDC1	6.11E-32	0.654534402	0.265	0.094	1.38E-27	5.92E-31	19.78507882	30.22771416	black
TMSB15B2	6.32E-32	0.869688025	0.149	0.032	1.43E-27	6.12E-31	26.27637853	30.21356828	black
SNRPN	6.49E-32	0.375251685	0.924	0.638	1.47E-27	6.28E-31	11.3334203	30.20218365	black
X0610030E20RIK	6.69E-32	0.638053205	0.238	0.079	1.51E-27	6.47E-31	19.26242917	30.18937766	black
GPR162	7.57E-32	0.433892641	0.476	0.227	1.71E-27	7.31E-31	13.07592464	30.13631351	black
COA3	7.61E-32	0.855291983	0.193	0.054	1.72E-27	7.33E-31	25.77405258	30.13479969	black
NSG1	7.63E-32	0.390026789	0.712	0.402	1.72E-27	7.35E-31	11.75303135	30.13390793	black
FGF1	8.56E-32	0.873579843	0.159	0.037	1.94E-27	8.23E-31	26.28115722	30.08443638	black
CMAS	9.15E-32	0.563057803	0.303	0.116	2.07E-27	8.79E-31	16.92321679	30.05591377	black
EXOSC1	9.29E-32	0.632123607	0.249	0.085	2.10E-27	8.91E-31	18.99527582	30.04993899	black
SLIRP	9.92E-32	0.537575637	0.35	0.144	2.24E-27	9.51E-31	16.13906895	30.02195012	black
CCDC32	1.00E-31	0.922516116	0.132	0.023	2.26E-27	9.58E-31	27.69246995	30.0184132	black
TAC1	1.03E-31	0.881840653	0.154	0.034	2.32E-27	9.83E-31	26.46165207	30.00729437	black
SNTG1	1.06E-31	-0.437722324	0.973	0.928	2.40E-27	1.01E-30	13.1288779	29.99362194	black
X2300009A05RIK	1.07E-31	0.49840141	0.297	0.112	2.42E-27	1.02E-30	14.94734859	29.99058248	black
FYCO1	1.24E-31	0.401254514	0.438	0.198	2.80E-27	1.18E-30	12.00869068	29.92786442	black
S100B	1.25E-31	0.923962996	0.154	0.034	2.82E-27	1.19E-30	27.65009996	29.92554904	black
MSMO1	1.31E-31	0.626108779	0.272	0.098	2.96E-27	1.24E-30	18.72375623	29.90495719	black
INA	1.38E-31	0.437120832	0.457	0.214	3.11E-27	1.31E-30	13.0628041	29.88373728	black
DCC	1.52E-31	-0.750697331	0.849	0.844	3.44E-27	1.44E-30	22.40143696	29.84083737	black
CLCN4	1.55E-31	0.457791972	0.41	0.182	3.51E-27	1.47E-30	13.65709242	29.8325293	black
MTMR1	1.56E-31	0.519252861	0.375	0.161	3.53E-27	1.48E-30	15.48925998	29.82989818	black
SLC22A17	1.61E-31	0.393460938	0.904	0.641	3.63E-27	1.52E-30	11.73235582	29.81834962	black
MOB4	1.62E-31	0.450011254	0.377	0.162	3.66E-27	1.53E-30	13.41728879	29.81545169	black
B230219D22RIK	1.63E-31	0.517171616	0.281	0.103	3.68E-27	1.54E-30	15.41879163	29.81368499	black
RAN	1.78E-31	0.575971705	0.316	0.124	4.02E-27	1.68E-30	17.15010605	29.77595236	black
CMC2	1.88E-31	0.723249948	0.188	0.052	4.25E-27	1.77E-30	21.51845923	29.75245182	black
SYCP2	1.91E-31	0.534049333	0.271	0.098	4.32E-27	1.80E-30	15.88576856	29.74588221	black
ACTR10	2.01E-31	0.456577121	0.354	0.147	4.55E-27	1.89E-30	13.57123629	29.72386407	black
COX17	2.01E-31	0.698250976	0.259	0.093	4.55E-27	1.89E-30	20.75467894	29.72380942	black
DBP	2.44E-31	0.798203969	0.187	0.051	5.50E-27	2.28E-30	23.66009541	29.64166597	black
GM15614	2.65E-31	0.805430351	0.162	0.039	5.98E-27	2.48E-30	23.8455353	29.60595569	black
ATL1	2.71E-31	0.416080478	0.585	0.301	6.12E-27	2.53E-30	12.31447516	29.59637817	black
AKR1A1	2.79E-31	0.465670657	0.402	0.178	6.30E-27	2.60E-30	13.77660267	29.58443371	black
PPP1R10	2.79E-31	0.633867997	0.244	0.083	6.31E-27	2.60E-30	18.75262575	29.58443371	black
THAP2	2.82E-31	0.423084809	0.407	0.182	6.36E-27	2.62E-30	12.51526184	29.5809766	black
PSMB3	2.94E-31	0.585951707	0.319	0.128	6.64E-27	2.73E-30	17.32267285	29.5633115	black
PPA1	2.95E-31	0.486261763	0.266	0.095	6.66E-27	2.74E-30	14.37494035	29.5621442	black
DIPK1B	3.12E-31	0.517983186	0.391	0.171	7.04E-27	2.89E-30	15.30040252	29.5384154	black
ELOVL5	3.16E-31	0.580332076	0.258	0.091	7.15E-27	2.94E-30	17.13844832	29.53214036	black
U2AF1	3.35E-31	0.414613702	0.401	0.177	7.58E-27	3.11E-30	12.23418574	29.5074323	black
IDH3A	3.60E-31	0.637369536	0.261	0.094	8.14E-27	3.33E-30	18.78781132	29.47710907	black
FAM32A	3.65E-31	0.649577577	0.225	0.073	8.26E-27	3.38E-30	19.14374352	29.47106582	black
ARPC3	3.72E-31	0.750681073	0.198	0.057	8.41E-27	3.44E-30	22.11774747	29.46357415	black
CXXC5	3.98E-31	0.820394266	0.195	0.056	9.00E-27	3.68E-30	24.14798461	29.4346092	black
TXN2	4.00E-31	0.681721554	0.217	0.067	9.04E-27	3.69E-30	20.06549271	29.43356064	black
ADCY3	4.24E-31	0.42571184	0.344	0.141	9.58E-27	3.90E-30	12.5195823	29.40858378	black
KLHL26	4.43E-31	0.747991325	0.181	0.049	1.00E-26	4.07E-30	21.98339743	29.38990961	black
BUB3	4.49E-31	0.619923959	0.219	0.068	1.01E-26	4.12E-30	18.21620656	29.38458223	black
GM13830	5.11E-31	0.549598243	0.244	0.083	1.15E-26	4.69E-30	16.11924785	29.32914732	black
MRPL15	5.17E-31	0.644123278	0.233	0.078	1.17E-26	4.74E-30	18.88861561	29.32453501	black
PFN2	5.45E-31	0.53409381	0.32	0.129	1.23E-26	4.99E-30	15.64978457	29.30156514	black
FAM162A	5.48E-31	0.6696126	0.226	0.074	1.24E-26	5.02E-30	19.61941203	29.29964586	black
X1500004A13RIK	5.76E-31	0.41457996	0.625	0.331	1.30E-26	5.27E-30	12.13829309	29.27853312	black
AA465934	5.89E-31	0.709500971	0.18	0.048	1.33E-26	5.37E-30	20.76688391	29.26970471	black
LURAP1	6.06E-31	0.95514404	0.111	0.015	1.37E-26	5.53E-30	27.94509238	29.25746403	black
PSTK	6.46E-31	0.410859098	0.354	0.147	1.46E-26	5.89E-30	12.00942217	29.23002615	black
DNAJC18	6.83E-31	0.402583385	0.481	0.225	1.54E-26	6.21E-30	11.75816069	29.2067709	black
RPL28	6.96E-31	0.389596916	0.481	0.227	1.57E-26	6.33E-30	11.37573408	29.19872726	black
SLC35G2	7.25E-31	0.580958564	0.282	0.105	1.64E-26	6.59E-30	16.95318949	29.18140903	black
SARAF	7.28E-31	0.40974659	0.604	0.318	1.65E-26	6.60E-30	11.95648646	29.18019762	black
ERGIC1	7.81E-31	0.426474869	0.424	0.193	1.76E-26	7.07E-30	12.43192548	29.15042921	black
PUF60	7.91E-31	0.524207863	0.271	0.099	1.79E-26	7.16E-30	15.27804995	29.1450225	black
ZFP2	7.98E-31	0.535209354	0.252	0.087	1.80E-26	7.22E-30	15.59692939	29.1417354	black
GM9993	8.04E-31	0.91698681	0.114	0.016	1.82E-26	7.26E-30	26.71988562	29.13878947	black
RPL34	8.15E-31	0.438967735	0.446	0.206	1.84E-26	7.35E-30	12.78863929	29.13343801	black
KLF9	8.42E-31	0.487753177	0.3	0.116	1.90E-26	7.58E-30	14.20340211	29.12006067	black
EIF4A2	8.81E-31	0.404769331	0.538	0.268	1.99E-26	7.93E-30	11.77899575	29.10051443	black
ANKRA2	9.30E-31	0.568302952	0.23	0.076	2.10E-26	8.36E-30	16.52498648	29.07777697	black
NMT1	9.43E-31	0.479962349	0.406	0.183	2.13E-26	8.47E-30	13.95345423	29.07197672	black
UBE4B	9.89E-31	0.406700173	0.56	0.283	2.24E-26	8.88E-30	11.81538226	29.05182504	black
PREB	1.01E-30	0.418060349	0.38	0.163	2.29E-26	9.06E-30	12.14160403	29.04270655	black
KDM5D	1.20E-30	0.392138522	0.43	0.194	2.71E-26	1.07E-29	11.35994714	28.96922006	black
GM13112	1.37E-30	0.656506938	0.214	0.067	3.10E-26	1.23E-29	18.98077353	28.91176383	black
ITPA	1.39E-30	0.553845937	0.25	0.086	3.14E-26	1.24E-29	16.00935932	28.90579897	black
CLUAP1	1.41E-30	0.536050586	0.274	0.102	3.18E-26	1.26E-29	15.49210484	28.90045312	black
ARFGAP2	1.43E-30	0.573131507	0.215	0.067	3.23E-26	1.27E-29	16.56068117	28.89508073	black
TRAPPC4	1.51E-30	0.73863988	0.193	0.056	3.41E-26	1.34E-29	21.32564994	28.87151171	black
GFPT1	1.51E-30	0.51288445	0.376	0.165	3.42E-26	1.35E-29	14.80737066	28.87077324	black
PRDX4	1.53E-30	0.850678445	0.143	0.03	3.45E-26	1.36E-29	24.55723103	28.8678186	black
SLC25A3	1.55E-30	0.423380279	0.652	0.36	3.51E-26	1.38E-29	12.21908994	28.86079147	black
A930005H10RIK	1.61E-30	0.628235954	0.217	0.068	3.64E-26	1.43E-29	18.12170961	28.84538762	black
CGREF1	1.62E-30	0.683953398	0.199	0.059	3.66E-26	1.43E-29	19.7275442	28.84340404	black
SWI5	1.73E-30	0.53424315	0.321	0.129	3.92E-26	1.54E-29	15.39356403	28.81377893	black
SEMA4D	1.77E-30	0.527947181	0.364	0.158	4.01E-26	1.57E-29	15.20726364	28.8045172	black
EIF4A1	1.81E-30	0.515472736	0.381	0.167	4.09E-26	1.60E-29	14.84381812	28.79651452	black
POLR2M	1.83E-30	0.727892123	0.22	0.072	4.13E-26	1.61E-29	20.95770516	28.79232305	black
PRSS12	1.85E-30	1.007252513	0.144	0.031	4.18E-26	1.63E-29	28.99693672	28.78815029	red
X6430548M08RIK	1.91E-30	0.58740196	0.26	0.094	4.32E-26	1.68E-29	16.90208774	28.77431279	black
GM16638	1.95E-30	0.781495387	0.149	0.033	4.41E-26	1.72E-29	22.47964124	28.76490588	black
PSMB2	2.08E-30	0.451022665	0.484	0.235	4.70E-26	1.83E-29	12.96170258	28.73847277	black
MAPT	2.11E-30	0.415288559	0.863	0.625	4.77E-26	1.85E-29	11.93228599	28.73251797	black
GPS2	2.16E-30	0.45227175	0.307	0.12	4.88E-26	1.89E-29	12.99061648	28.72303314	black
DDOST	2.21E-30	0.713657678	0.249	0.088	5.00E-26	1.94E-29	20.49109167	28.71277408	black
OS9	2.32E-30	0.508409028	0.361	0.154	5.25E-26	2.03E-29	14.58717324	28.6918061	black
FUCA1	2.37E-30	0.773315512	0.212	0.067	5.36E-26	2.07E-29	22.18140634	28.68351404	black
GM20275	2.41E-30	0.649512241	0.216	0.069	5.45E-26	2.11E-29	18.62563912	28.67634811	black
SPOUT1	2.60E-30	0.586440095	0.263	0.096	5.88E-26	2.27E-29	16.79818843	28.64433824	black
YWHAG	2.82E-30	0.401819876	0.598	0.317	6.38E-26	2.46E-29	11.49578954	28.60931038	black
RAPGEF1	2.94E-30	0.446047126	0.459	0.219	6.64E-26	2.56E-29	12.7535351	28.59234902	black
FIS1	2.99E-30	0.520104895	0.285	0.108	6.77E-26	2.60E-29	14.86683111	28.58429379	black
OGFRL1	3.04E-30	0.550409421	0.307	0.123	6.86E-26	2.64E-29	15.73005505	28.57882597	black
SFXN1	3.05E-30	0.389920566	0.403	0.181	6.90E-26	2.65E-29	11.14260437	28.57660079	black
FLRT1	3.11E-30	0.58775945	0.274	0.103	7.02E-26	2.69E-29	16.79213417	28.56973916	black
UQCC2	3.41E-30	0.575182727	0.252	0.09	7.72E-26	2.96E-29	16.40943448	28.52908077	black
SNRPD2	3.54E-30	0.626011326	0.221	0.072	8.01E-26	3.07E-29	17.84974641	28.51345601	black
KCTD13	3.57E-30	0.680271691	0.211	0.066	8.08E-26	3.09E-29	19.39464096	28.51013973	black
GPATCH11	3.90E-30	0.743835235	0.177	0.048	8.81E-26	3.37E-29	21.17907896	28.47280952	black
MOCS2	4.03E-30	0.674285453	0.209	0.065	9.11E-26	3.48E-29	19.1892131	28.4585898	black
ST3GAL3	4.42E-30	0.436695119	0.527	0.267	9.98E-26	3.81E-29	12.41067335	28.4195376	black
PCP4L1	4.57E-30	0.63935795	0.202	0.061	1.03E-25	3.93E-29	18.16102991	28.40510531	black
LRCH3	4.89E-30	0.3746256	0.586	0.3	1.10E-25	4.20E-29	10.63059453	28.37658327	black
MIR670HG	5.37E-30	0.613051499	0.386	0.181	1.21E-25	4.62E-29	17.37124018	28.33569484	black
ATP6V1G2	5.58E-30	0.455555642	0.435	0.204	1.26E-25	4.79E-29	12.90110303	28.3194891	black
OSBP2	5.59E-30	0.63340983	0.272	0.103	1.26E-25	4.79E-29	17.9377334	28.31931642	black
FABP5	5.60E-30	0.664435231	0.233	0.079	1.27E-25	4.80E-29	18.81597766	28.31875369	black
SMIM7	6.14E-30	0.792598429	0.168	0.043	1.39E-25	5.25E-29	22.41449042	28.27975631	black
MPC2	6.27E-30	0.473181419	0.421	0.194	1.42E-25	5.36E-29	13.37733484	28.27104848	black
LSM3	6.29E-30	0.909459563	0.138	0.029	1.42E-25	5.37E-29	25.71048004	28.27006398	black
GPI1	7.26E-30	0.408103974	0.506	0.251	1.64E-25	6.19E-29	11.51188644	28.20821943	black
CCDC25	7.33E-30	0.703096796	0.175	0.047	1.66E-25	6.25E-29	19.83022387	28.20411639	black
HMGCR	8.03E-30	0.603574684	0.273	0.103	1.82E-25	6.84E-29	16.99961889	28.16489712	black
ENSA	8.14E-30	0.451139463	0.281	0.106	1.84E-25	6.93E-29	12.70382469	28.15941794	black
LSAMP	8.43E-30	-0.364379388	0.997	0.992	1.91E-25	7.17E-29	10.25536461	28.14474403	black
CBX1	8.69E-30	0.456049335	0.369	0.161	1.96E-25	7.38E-29	12.82968818	28.13223745	black
SPRED2	9.28E-30	0.377869971	0.489	0.238	2.10E-25	7.87E-29	10.61964623	28.10396973	black
QTRT1	9.78E-30	0.505757615	0.313	0.127	2.21E-25	8.29E-29	14.2025345	28.08170175	black
GIN1	9.85E-30	0.721289021	0.189	0.055	2.23E-25	8.34E-29	20.25301126	28.07891243	black
HYAL1	9.88E-30	0.848869117	0.115	0.018	2.23E-25	8.35E-29	23.83465866	28.07813148	black
GART	1.03E-29	0.506139184	0.241	0.083	2.32E-25	8.68E-29	14.20293226	28.06131733	black
GAP43	1.06E-29	0.414270996	0.625	0.345	2.39E-25	8.92E-29	11.62018382	28.04971608	black
DEGS1	1.07E-29	0.641963435	0.231	0.078	2.42E-25	9.02E-29	18.00367545	28.04470548	black
KLHDC1	1.08E-29	0.552097124	0.275	0.104	2.45E-25	9.13E-29	15.48057478	28.03958598	black
TMEM50A	1.16E-29	0.437876056	0.348	0.148	2.62E-25	9.76E-29	12.26506811	28.01036492	black
TMEM108	1.16E-29	0.534999454	0.706	0.439	2.63E-25	9.79E-29	14.98490569	28.00919812	black
OSBPL1A	1.22E-29	0.439249884	0.407	0.188	2.76E-25	1.02E-28	12.2944529	27.98965543	black
ALS2	1.24E-29	0.476473901	0.282	0.107	2.81E-25	1.04E-28	13.33264201	27.98189363	black
PIM2	1.32E-29	0.611877872	0.239	0.083	2.98E-25	1.10E-28	17.10653819	27.95743884	black
RIMS2	1.39E-29	-0.397230738	0.966	0.932	3.14E-25	1.16E-28	11.09646381	27.93455477	black
GRM5	1.96E-29	-0.475434481	0.962	0.932	4.43E-25	1.64E-28	13.21035701	27.78586227	black
CHST11	1.96E-29	0.552166822	0.285	0.111	4.44E-25	1.64E-28	15.3420637	27.78519658	black
MT2	1.97E-29	0.787714384	0.153	0.036	4.45E-25	1.64E-28	21.88591275	27.78407147	black
MRPS14	1.98E-29	0.744550759	0.224	0.077	4.48E-25	1.65E-28	20.68532964	27.7822961	black
DLGAP4	2.02E-29	0.357765792	0.509	0.251	4.57E-25	1.69E-28	9.936333349	27.77329072	black
BFAR	2.09E-29	0.461963603	0.344	0.146	4.73E-25	1.74E-28	12.82354982	27.75878823	black
TPRGL	2.18E-29	0.773429841	0.163	0.042	4.92E-25	1.81E-28	21.45685068	27.74246552	black
LSM12	2.24E-29	0.589727958	0.236	0.081	5.06E-25	1.86E-28	16.35347117	27.73053397	black
NGDN	2.24E-29	0.505182372	0.249	0.088	5.07E-25	1.86E-28	14.00880911	27.73020176	black
MTO1	2.30E-29	0.446451595	0.26	0.095	5.20E-25	1.91E-28	12.37531378	27.7192733	black
TMEM9	2.39E-29	0.476904778	0.366	0.161	5.41E-25	1.98E-28	13.211652	27.7029139	black
DMAC2	2.51E-29	0.626092928	0.197	0.059	5.68E-25	2.08E-28	17.3315492	27.68207152	black
SYT11	2.60E-29	0.371104335	0.87	0.603	5.88E-25	2.15E-28	10.26755445	27.66756808	black
PPIL2	2.87E-29	0.48138365	0.345	0.147	6.49E-25	2.37E-28	13.2981753	27.62490026	black
TCF25	2.99E-29	0.398179667	0.748	0.428	6.77E-25	2.47E-28	10.99267536	27.60732468	black
COPS8	3.01E-29	0.691762484	0.228	0.078	6.81E-25	2.48E-28	19.09640124	27.60543058	black
ZCCHC18	3.01E-29	0.444815061	0.795	0.509	6.81E-25	2.48E-28	12.27931128	27.60543058	black
MRPS5	3.27E-29	0.461761772	0.391	0.177	7.39E-25	2.69E-28	12.73106815	27.57064126	black
DNAJC30	3.29E-29	0.807866401	0.141	0.031	7.44E-25	2.70E-28	22.27128031	27.56802396	black
RNF13	3.67E-29	0.478143637	0.42	0.196	8.30E-25	3.01E-28	13.15891333	27.52083751	black
STXBP1	3.77E-29	0.382416703	0.816	0.515	8.53E-25	3.09E-28	10.52008911	27.50949166	black
TBC1D8	3.80E-29	0.458975873	0.3	0.117	8.59E-25	3.11E-28	12.62503871	27.50697687	black
RABL6	3.89E-29	0.357388674	0.601	0.317	8.79E-25	3.18E-28	9.827123918	27.49702115	black
DNAJA3	3.92E-29	0.633139341	0.244	0.087	8.85E-25	3.20E-28	17.40789916	27.49457826	black
MAGI2	4.03E-29	-0.337412652	0.996	0.988	9.11E-25	3.29E-28	9.273006902	27.48268881	black
EDF1	4.07E-29	0.53605888	0.298	0.119	9.20E-25	3.32E-28	14.73020144	27.47870054	black
AJAP1	4.21E-29	0.548405559	0.35	0.155	9.52E-25	3.44E-28	15.06144959	27.46407167	black
PTPRD	4.60E-29	-0.465509109	0.982	0.969	1.04E-24	3.75E-28	12.76701699	27.42592304	black
PHACTR3	4.82E-29	0.385396743	0.62	0.329	1.09E-24	3.92E-28	10.56237574	27.40649974	black
PLLP	4.87E-29	1.065100463	0.1	0.012	1.10E-24	3.96E-28	29.18631992	27.40241031	red
TMEM63C	5.00E-29	0.474514844	0.283	0.11	1.13E-24	4.06E-28	12.99757512	27.391293	black
RPL31	5.24E-29	0.384542049	0.52	0.263	1.18E-24	4.25E-28	10.52548069	27.37146875	black
RABAC1	5.60E-29	0.368024812	0.751	0.439	1.27E-24	4.54E-28	10.06290327	27.34300227	black
CERK	5.69E-29	0.443273492	0.334	0.142	1.29E-24	4.61E-28	12.11748288	27.33635802	black
AFG3L1	5.70E-29	0.348249176	0.421	0.193	1.29E-24	4.61E-28	9.519864154	27.33635802	black
PSMD5	5.94E-29	0.591851159	0.224	0.076	1.34E-24	4.80E-28	16.16854654	27.31860246	black
NFU1	5.98E-29	0.637640013	0.211	0.069	1.35E-24	4.83E-28	17.41770163	27.31588556	black
NDUFA3	6.01E-29	0.467395211	0.385	0.174	1.36E-24	4.85E-28	12.76659314	27.31434308	black
SLC2A8	6.12E-29	0.57153365	0.266	0.101	1.38E-24	4.93E-28	15.60671697	27.30673333	black
X5330438D12RIK	6.44E-29	0.50309012	0.256	0.093	1.46E-24	5.19E-28	13.72688324	27.2851378	black
DNAJC8	6.47E-29	0.435966349	0.44	0.209	1.46E-24	5.20E-28	11.89483754	27.28384325	black
GRCC10	7.35E-29	0.492696547	0.305	0.122	1.66E-24	5.90E-28	13.41555133	27.22883164	black
LYSMD2	7.43E-29	0.734061569	0.17	0.046	1.68E-24	5.97E-28	19.98425657	27.22422396	black
DISC1	7.47E-29	0.855222873	0.142	0.032	1.69E-24	5.99E-28	23.28118646	27.22236178	black
IGF2BP3	7.51E-29	0.467910673	0.349	0.151	1.70E-24	6.02E-28	12.73685797	27.22070409	black
ZFP112	7.70E-29	0.522015197	0.23	0.079	1.74E-24	6.17E-28	14.20403192	27.20999696	black
GLE1	7.93E-29	0.396336632	0.361	0.159	1.79E-24	6.34E-28	10.77953558	27.19792902	black
AGAP1	7.93E-29	0.392623133	0.755	0.464	1.79E-24	6.34E-28	10.67853609	27.19792902	black
AP2M1	8.39E-29	0.493719006	0.312	0.129	1.90E-24	6.70E-28	13.41626367	27.17388537	black
SNX3	8.54E-29	0.427729379	0.32	0.132	1.93E-24	6.82E-28	11.61987963	27.16642857	black
TEF	8.62E-29	0.361032114	0.522	0.264	1.95E-24	6.87E-28	9.806765171	27.1631381	black
GPM6B	8.69E-29	0.379821185	0.601	0.323	1.96E-24	6.92E-28	10.31587185	27.15981167	black
SCFD1	8.86E-29	0.39333158	0.5	0.25	2.00E-24	7.04E-28	10.67980774	27.15217464	black
CTBP2	9.32E-29	0.586438336	0.225	0.077	2.11E-24	7.41E-28	15.91019972	27.13021768	black
GLMN	9.50E-29	0.348203075	0.423	0.194	2.15E-24	7.54E-28	9.44411904	27.12244584	black
ZFP612	1.00E-28	0.336816445	0.51	0.253	2.26E-24	7.94E-28	9.127809394	27.10024864	black
CTSB	1.02E-28	0.374493041	0.766	0.46	2.30E-24	8.08E-28	10.14604232	27.09273929	black
X2810013P06RIK	1.02E-28	0.65022295	0.197	0.061	2.31E-24	8.10E-28	17.61543209	27.09137242	black
URM1	1.10E-28	0.442614261	0.258	0.095	2.48E-24	8.69E-28	11.97765968	27.06116982	black
COX19	1.11E-28	0.49780054	0.247	0.089	2.51E-24	8.79E-28	13.46860902	27.05623625	black
SLC39A13	1.13E-28	0.516015778	0.216	0.071	2.56E-24	8.94E-28	13.95748325	27.04855905	black
ITPR1	1.18E-28	0.389006074	0.525	0.276	2.67E-24	9.33E-28	10.51485228	27.03004655	black
RESP18	1.33E-28	0.526458196	0.814	0.552	3.00E-24	1.05E-27	14.20423585	26.98074786	black
TBC1D9	1.38E-28	0.435667479	0.434	0.207	3.12E-24	1.09E-27	11.74731773	26.96395371	black
REXO2	1.39E-28	0.591118263	0.2	0.062	3.14E-24	1.09E-27	15.93747608	26.96156939	black
PXMP4	1.41E-28	0.668676644	0.198	0.062	3.18E-24	1.11E-27	18.02501051	26.95624362	black
HMGCL	1.41E-28	0.461516795	0.293	0.117	3.19E-24	1.11E-27	12.4406841	26.95608098	black
ABCG1	1.44E-28	0.564276833	0.264	0.1	3.25E-24	1.13E-27	15.20574444	26.947313	black
POLR3E	1.55E-28	0.486103923	0.259	0.097	3.50E-24	1.21E-27	13.08371776	26.91547451	black
SOX4	1.63E-28	0.78870387	0.181	0.053	3.68E-24	1.28E-27	21.21163297	26.894293	black
RAB5IF	1.63E-28	0.510263812	0.23	0.079	3.69E-24	1.28E-27	13.72275667	26.89345461	black
FKBP1A	1.64E-28	0.406266252	0.376	0.169	3.70E-24	1.28E-27	10.92576458	26.8931139	black
X5330439K02RIK	1.72E-28	0.701406396	0.183	0.054	3.90E-24	1.35E-27	18.84756067	26.87109895	black
SGCZ	1.79E-28	-0.532985057	0.942	0.946	4.04E-24	1.39E-27	14.31365267	26.85563597	black
ANKS1	1.85E-28	0.450002167	0.427	0.203	4.19E-24	1.45E-27	12.078062	26.84000854	black
EIF3K	1.96E-28	0.499696453	0.272	0.104	4.43E-24	1.53E-27	13.40003937	26.81635882	black
PLEKHH2	2.03E-28	0.603135198	0.262	0.1	4.59E-24	1.58E-27	16.1650005	26.80162019	black
PSENEN	2.22E-28	0.463409023	0.291	0.115	5.03E-24	1.73E-27	12.40193974	26.76240452	black
GAREM1	2.26E-28	0.53094246	0.326	0.14	5.12E-24	1.76E-27	14.20529419	26.75486565	black
SERF2	2.34E-28	0.416209705	0.367	0.163	5.30E-24	1.82E-27	11.12958963	26.74034148	black
CCDC117	2.38E-28	0.884171976	0.138	0.031	5.38E-24	1.85E-27	23.63737388	26.73390984	black
GATM	2.42E-28	0.796213357	0.164	0.044	5.46E-24	1.87E-27	21.2811325	26.72792703	black
MAP3K10	2.43E-28	0.557463733	0.223	0.076	5.49E-24	1.88E-27	14.89897579	26.72635887	black
PEA15A	2.48E-28	0.502371036	0.314	0.13	5.61E-24	1.92E-27	13.4217868	26.71688023	black
GTPBP2	2.49E-28	0.448044035	0.331	0.141	5.63E-24	1.92E-27	11.96977765	26.71562773	black
C2CD3	2.49E-28	0.366813813	0.329	0.138	5.64E-24	1.92E-27	9.799661281	26.71562773	black
REEP5	2.55E-28	0.364936678	0.608	0.325	5.76E-24	1.96E-27	9.746364384	26.70700146	black
KPTN	2.65E-28	0.709330392	0.151	0.037	5.98E-24	2.04E-27	18.93270943	26.69096045	black
GM40841	2.67E-28	-0.885570232	0.661	0.651	6.03E-24	2.05E-27	23.63392542	26.68780471	black
TNRC6A	2.68E-28	-0.59022454	0.839	0.779	6.05E-24	2.06E-27	15.75123453	26.68685128	black
KHDRBS1	2.69E-28	0.420602856	0.435	0.21	6.08E-24	2.06E-27	11.22382641	26.6850932	black
NDUFA13	2.81E-28	0.280232278	0.628	0.327	6.35E-24	2.15E-27	7.472876382	26.66672243	black
HSPA12A	2.81E-28	0.486437033	0.322	0.138	6.36E-24	2.16E-27	12.97135659	26.66605483	black
D430042O09RIK	3.02E-28	0.372072349	0.337	0.144	6.82E-24	2.31E-27	9.910492092	26.63592747	black
P4HA1	3.14E-28	0.48312029	0.29	0.115	7.11E-24	2.41E-27	12.86004697	26.6187267	black
RPLP2	3.19E-28	0.352408485	0.523	0.263	7.21E-24	2.44E-27	9.378536106	26.61268526	black
TPRKB	3.22E-28	0.642873708	0.209	0.069	7.27E-24	2.46E-27	17.10657296	26.60953891	black
GLUD1	3.42E-28	0.399424564	0.52	0.262	7.72E-24	2.61E-27	10.61817115	26.58367086	black
M6PR	3.45E-28	0.500712427	0.253	0.092	7.80E-24	2.63E-27	13.30890221	26.57993192	black
GM46218	3.75E-28	0.856276515	0.118	0.021	8.47E-24	2.85E-27	22.72951447	26.54459635	black
ATXN7L3B	3.88E-28	0.356545701	0.486	0.238	8.77E-24	2.95E-27	9.45899121	26.52953379	black
H2AFZ	4.01E-28	0.471189202	0.339	0.147	9.08E-24	3.05E-27	12.49369185	26.51523377	black
SRSF5	4.05E-28	0.354227301	0.605	0.322	9.16E-24	3.08E-27	9.391049918	26.51136682	black
MRPL42	4.19E-28	0.538974575	0.266	0.102	9.48E-24	3.18E-27	14.28127094	26.49711434	black
SHC2	4.51E-28	0.461505009	0.247	0.09	1.02E-23	3.42E-27	12.2142217	26.46606531	black
MCRIP1	4.57E-28	0.598249467	0.245	0.09	1.03E-23	3.47E-27	15.82979547	26.46019154	black
TUBA1B	4.59E-28	0.345983474	0.642	0.347	1.04E-23	3.48E-27	9.154335412	26.45888054	black
SSU72	4.73E-28	0.518494925	0.253	0.095	1.07E-23	3.58E-27	13.71248341	26.44670707	black
H2AFV	5.01E-28	0.722555648	0.196	0.062	1.13E-23	3.78E-27	19.09145531	26.42212453	black
UBXN4	5.06E-28	0.363067605	0.655	0.361	1.14E-23	3.82E-27	9.591495458	26.41793241	black
PDCD5	5.10E-28	0.586277426	0.242	0.089	1.15E-23	3.85E-27	15.4865021	26.4149725	black
GFOD2	5.20E-28	0.44511678	0.43	0.206	1.18E-23	3.92E-27	11.75415843	26.40690927	black
SETD7	5.26E-28	0.37873929	0.396	0.181	1.19E-23	3.96E-27	9.999667071	26.40250782	black
TALDO1	5.51E-28	0.62639921	0.2	0.064	1.25E-23	4.15E-27	16.5257134	26.38207893	black
PDZD11	5.62E-28	0.904008618	0.111	0.018	1.27E-23	4.22E-27	23.84276287	26.37448627	black
NACC2	6.00E-28	0.63734969	0.247	0.092	1.36E-23	4.51E-27	16.79177141	26.3462455	black
PSMD4	6.54E-28	0.426780065	0.376	0.17	1.48E-23	4.91E-27	11.22819301	26.30908504	black
X4930578M01RIK	6.70E-28	0.675836834	0.168	0.046	1.52E-23	5.03E-27	17.77366751	26.2987553	black
SC5D	6.94E-28	0.588135073	0.273	0.108	1.57E-23	5.20E-27	15.45859153	26.28408378	black
TXNRD1	6.97E-28	0.536910385	0.23	0.081	1.58E-23	5.22E-27	14.11140976	26.2826165	black
EIF4EBP2	7.23E-28	0.505325897	0.251	0.093	1.64E-23	5.41E-27	13.27343053	26.26706965	black
RER1	7.24E-28	0.562234985	0.262	0.1	1.64E-23	5.41E-27	14.76826552	26.26706965	black
PTPA	7.42E-28	0.295309595	0.478	0.23	1.68E-23	5.54E-27	7.753879624	26.25678186	black
SMIM10L1	7.54E-28	0.314722715	0.381	0.171	1.71E-23	5.63E-27	8.261389591	26.24974049	black
NARS	7.66E-28	0.35922558	0.383	0.172	1.73E-23	5.71E-27	9.427355372	26.24355254	black
XPR1	7.69E-28	0.371049193	0.721	0.416	1.74E-23	5.72E-27	9.737253712	26.24248721	black
ACOT13	7.79E-28	0.708509029	0.198	0.064	1.76E-23	5.79E-27	18.58923302	26.23711521	black
LMAN2L	7.86E-28	0.44146735	0.3	0.123	1.78E-23	5.84E-27	11.58122852	26.23348822	black
ACSL3	8.63E-28	0.395438363	0.413	0.192	1.95E-23	6.41E-27	10.35788719	26.19343026	black
HS2ST1	8.85E-28	0.324000093	0.544	0.281	2.00E-23	6.56E-27	8.483264567	26.18290783	black
FSTL4	8.98E-28	0.688265251	0.457	0.248	2.03E-23	6.65E-27	18.01673233	26.17701867	black
CDC42SE2	9.03E-28	0.379194557	0.315	0.129	2.04E-23	6.69E-27	9.925274421	26.17462263	black
RALGPS1	9.24E-28	0.327082169	0.687	0.385	2.09E-23	6.83E-27	8.558240006	26.16541287	black
MIA3	9.24E-28	0.296672159	0.498	0.244	2.09E-23	6.83E-27	7.762549525	26.16541287	black
RTL8A	9.28E-28	0.343641523	0.459	0.222	2.10E-23	6.86E-27	8.991009478	26.16392047	black
PRXL2A	9.33E-28	0.574414831	0.263	0.102	2.11E-23	6.88E-27	15.02797399	26.16223186	black
AP2A2	9.76E-28	0.331299462	0.463	0.228	2.21E-23	7.19E-27	8.661172142	26.14303108	black
ATP6V1A	9.85E-28	0.368912158	0.595	0.318	2.23E-23	7.26E-27	9.643118509	26.1393351	black
PDE6D	1.00E-27	0.57394017	0.242	0.089	2.27E-23	7.37E-27	14.99842275	26.13238024	black
PDXP	1.00E-27	0.491788447	0.289	0.116	2.27E-23	7.37E-27	12.85160268	26.13238024	black
SERAC1	1.01E-27	0.498849281	0.211	0.07	2.27E-23	7.39E-27	13.03547108	26.13108124	black
LACTB	1.10E-27	0.662510465	0.182	0.054	2.49E-23	8.08E-27	17.28664181	26.09263207	black
RPL18	1.15E-27	0.363175424	0.339	0.144	2.60E-23	8.43E-27	9.469506441	26.07419393	black
SIRT2	1.21E-27	0.349223257	0.35	0.152	2.74E-23	8.90E-27	9.097558568	26.05083817	black
ADPRH	1.22E-27	0.441024773	0.29	0.116	2.75E-23	8.90E-27	11.48893708	26.05054812	black
MIA2	1.27E-27	0.340979028	0.413	0.193	2.88E-23	9.32E-27	8.875959834	26.03080867	black
RANBP1	1.31E-27	0.566187463	0.255	0.097	2.97E-23	9.59E-27	14.73127963	26.01837837	black
HSD17B12	1.31E-27	0.376717303	0.388	0.177	2.97E-23	9.59E-27	9.801573318	26.01837837	black
CDH22	1.31E-27	0.58077066	0.334	0.148	2.97E-23	9.59E-27	15.11052811	26.01806383	black
NDEL1	1.36E-27	0.506191889	0.312	0.131	3.06E-23	9.88E-27	13.16361117	26.00517997	black
PINK1	1.40E-27	0.685574704	0.211	0.071	3.17E-23	1.02E-26	17.81814023	25.9900783	black
PBX4	1.49E-27	0.458070265	0.263	0.102	3.37E-23	1.09E-26	11.89339422	25.96412631	black
SETD4	1.62E-27	0.483372582	0.31	0.13	3.66E-23	1.18E-26	12.53338	25.92902548	black
PLEKHM3	1.62E-27	0.37951294	0.472	0.23	3.67E-23	1.18E-26	9.840109263	25.92825758	black
MORN2	1.63E-27	0.588167532	0.225	0.079	3.69E-23	1.19E-26	15.24872668	25.92582188	black
COX11	1.75E-27	0.565200947	0.261	0.1	3.96E-23	1.27E-26	14.63644751	25.8960067	black
ZFAND2A	1.79E-27	0.704261395	0.152	0.039	4.05E-23	1.30E-26	18.23079065	25.88639784	black
SECISBP2	1.81E-27	0.464968116	0.287	0.114	4.10E-23	1.31E-26	12.03408712	25.8815319	black
CIRBP	2.01E-27	0.482299398	0.285	0.115	4.55E-23	1.46E-26	12.46117199	25.83700504	black
NOP10	2.05E-27	0.466589625	0.313	0.132	4.62E-23	1.48E-26	12.05202984	25.83004253	black
P4HTM	2.12E-27	0.361223669	0.47	0.234	4.79E-23	1.53E-26	9.325190752	25.81555846	black
GAD1	2.17E-27	0.37105922	0.768	0.47	4.91E-23	1.57E-26	9.575031792	25.80459201	black
AGPAT4	2.21E-27	0.509424115	0.286	0.116	5.00E-23	1.60E-26	13.14159017	25.79695344	black
PHKG2	2.30E-27	0.300088836	0.394	0.177	5.21E-23	1.66E-26	7.736259495	25.77989772	black
DDX24	2.38E-27	0.368675826	0.685	0.391	5.39E-23	1.72E-26	9.499109552	25.76547978	black
ARPC2	2.43E-27	0.332895676	0.459	0.221	5.49E-23	1.75E-26	8.574656469	25.75778866	black
CSNK2A1	2.46E-27	0.376743646	0.443	0.215	5.57E-23	1.77E-26	9.701943368	25.7521088	black
MAP2K1	2.55E-27	0.347095825	0.361	0.16	5.77E-23	1.83E-26	8.933120791	25.7367567	black
CCT3	2.66E-27	0.388997309	0.342	0.148	6.01E-23	1.91E-26	10.00486769	25.71963214	black
EID1	2.67E-27	0.442725138	0.252	0.093	6.04E-23	1.92E-26	11.38580766	25.71755406	black
NDUFB3	2.74E-27	0.537764624	0.329	0.146	6.19E-23	1.96E-26	13.8247172	25.70774755	black
ARXES1	2.75E-27	0.560433815	0.217	0.074	6.22E-23	1.97E-26	14.4064115	25.7058213	black
FBXO2	2.88E-27	0.660265439	0.183	0.056	6.50E-23	2.06E-26	16.96017357	25.68690191	black
PNKD	2.92E-27	0.337180689	0.555	0.293	6.60E-23	2.08E-26	8.659133843	25.68098985	black
UBE2E1	3.06E-27	0.397415568	0.361	0.16	6.92E-23	2.19E-26	10.19787362	25.66047845	black
PDZD2	3.07E-27	0.467228489	0.57	0.328	6.95E-23	2.19E-26	11.98870904	25.65919958	black
NCALD	3.10E-27	0.397749744	0.604	0.34	7.00E-23	2.21E-26	10.20482604	25.65639879	black
SOCS2	3.11E-27	0.878543947	0.147	0.037	7.02E-23	2.21E-26	22.53936293	25.65536193	black
SYP	3.23E-27	0.361854807	0.894	0.616	7.30E-23	2.30E-26	9.277454565	25.63861077	black
WBP4	3.34E-27	0.427610891	0.322	0.138	7.56E-23	2.38E-26	10.95707874	25.62394685	black
YARS	3.37E-27	0.405649816	0.316	0.133	7.62E-23	2.39E-26	10.39304489	25.62073117	black
ZSWIM7	3.69E-27	0.783178456	0.143	0.035	8.33E-23	2.62E-26	20.0355137	25.58230957	black
ARL6IP5	3.92E-27	0.558705026	0.199	0.065	8.87E-23	2.78E-26	14.27814104	25.55577699	black
ADCK1	4.08E-27	0.528056648	0.244	0.091	9.23E-23	2.89E-26	13.4859533	25.53883823	black
CCDC149	4.10E-27	0.45528293	0.285	0.114	9.28E-23	2.90E-26	11.6265064	25.53688188	black
PITPNC1	4.13E-27	0.343741007	0.683	0.402	9.34E-23	2.92E-26	8.777228877	25.53442472	black
NNAT	4.30E-27	0.997330236	0.221	0.081	9.72E-23	3.04E-26	25.44907726	25.51720218	black
LAPTM4A	4.33E-27	0.344886013	0.455	0.22	9.78E-23	3.06E-26	8.799732686	25.51490159	black
FAIM	4.71E-27	0.60442536	0.18	0.054	1.07E-22	3.33E-26	15.39960384	25.47809022	black
SNU13	4.78E-27	0.669344387	0.221	0.079	1.08E-22	3.37E-26	17.05005412	25.47276775	black
MVB12B	4.85E-27	0.414113842	0.405	0.193	1.10E-22	3.41E-26	10.54614188	25.46676978	black
RNF103	4.89E-27	0.578282922	0.282	0.114	1.10E-22	3.44E-26	14.72518098	25.4636276	black
ATPAF2	4.91E-27	0.635245422	0.157	0.042	1.11E-22	3.45E-26	16.17476177	25.46222485	black
TM6SF1	5.20E-27	0.5287021	0.239	0.089	1.18E-22	3.66E-26	13.44861947	25.4370457	black
PYGB	5.69E-27	0.419152345	0.345	0.154	1.29E-22	4.00E-26	10.64582789	25.39846911	black
X4930430F08RIK	5.73E-27	0.787818837	0.157	0.043	1.29E-22	4.02E-26	20.00753987	25.39611766	black
PIK3R1	5.74E-27	0.544762991	0.271	0.109	1.30E-22	4.02E-26	13.83458624	25.39560592	black
TOMM22	6.79E-27	0.581326214	0.211	0.073	1.53E-22	4.75E-26	14.72093703	25.3230229	black
RAB11FIP4	6.86E-27	0.341228763	0.419	0.196	1.55E-22	4.80E-26	8.639431597	25.3185913	black
RIN2	6.87E-27	0.860591867	0.184	0.059	1.55E-22	4.80E-26	21.78890188	25.31850777	black
ECHDC1	7.31E-27	0.51386506	0.255	0.098	1.65E-22	5.11E-26	12.99662566	25.29190381	black
DDX23	7.35E-27	0.631689558	0.179	0.054	1.66E-22	5.13E-26	15.9753085	25.28980936	black
HCFC1R1	7.38E-27	0.482306659	0.252	0.096	1.67E-22	5.15E-26	12.19681759	25.2885117	black
HLF	7.49E-27	0.599504972	0.228	0.083	1.69E-22	5.22E-26	15.15710837	25.28270669	black
CACNA1A	7.53E-27	0.335859508	0.937	0.744	1.70E-22	5.24E-26	8.490653368	25.28037223	black
RABEPK	7.58E-27	0.498816139	0.231	0.083	1.71E-22	5.27E-26	12.60919654	25.27824494	black
TCEAL5	7.84E-27	0.368179632	0.347	0.152	1.77E-22	5.45E-26	9.301506066	25.26349982	black
ST13	7.93E-27	0.37138341	0.446	0.218	1.79E-22	5.51E-26	9.380803718	25.25908124	black
VASH1	8.23E-27	0.757908798	0.13	0.029	1.86E-22	5.71E-26	19.13212059	25.24330187	black
PSMG2	8.77E-27	0.600263942	0.198	0.065	1.98E-22	6.08E-26	15.13624231	25.21597792	black
X1810034E14RIK	8.84E-27	0.550846692	0.185	0.058	2.00E-22	6.12E-26	13.88856742	25.21312665	black
RPLP0	9.04E-27	0.514940269	0.26	0.102	2.04E-22	6.26E-26	12.97833363	25.203571	black
UBASH3B	9.06E-27	0.454791146	0.393	0.19	2.05E-22	6.27E-26	11.46206785	25.20292658	black
MAP7	9.11E-27	0.321973482	0.466	0.23	2.06E-22	6.29E-26	8.114079425	25.20107981	black
TRMT13	9.16E-27	0.367400004	0.323	0.139	2.07E-22	6.32E-26	9.258185775	25.19919888	black
CDK11B	9.24E-27	0.337254416	0.332	0.145	2.09E-22	6.38E-26	8.497289873	25.1954888	black
CNTN2	9.41E-27	0.459476279	0.329	0.144	2.13E-22	6.49E-26	11.57330526	25.18803646	black
CCT8	9.49E-27	0.461619571	0.285	0.115	2.14E-22	6.53E-26	11.62582423	25.18485989	black
ZFP1	9.69E-27	0.405874543	0.292	0.121	2.19E-22	6.67E-26	10.21821353	25.17579315	black
LRP11	9.75E-27	0.342229206	0.362	0.162	2.20E-22	6.71E-26	8.615140224	25.17359735	black
DOLK	9.89E-27	0.732975641	0.135	0.032	2.24E-22	6.80E-26	18.44721942	25.167575	black
CAPZB	1.00E-26	0.399366887	0.34	0.149	2.27E-22	6.89E-26	10.04868728	25.16154347	black
G6PDX	1.03E-26	0.676083334	0.149	0.038	2.34E-22	7.09E-26	17.00322487	25.14959919	black
MEF2D	1.03E-26	0.411528346	0.385	0.179	2.34E-22	7.09E-26	10.34977296	25.14959919	black
GM15680	1.05E-26	0.964030772	0.103	0.016	2.36E-22	7.16E-26	24.24066286	25.14511317	black
TNFAIP8	1.06E-26	-1.783056175	0.012	0.107	2.39E-22	7.23E-26	44.82703755	25.14056382	blue
ANK1	1.07E-26	0.385251824	0.674	0.384	2.42E-22	7.32E-26	9.683399928	25.13524748	black
PPP1R2	1.09E-26	0.273548982	0.394	0.183	2.46E-22	7.44E-26	6.873798413	25.12821787	black
TYW1	1.11E-26	0.471749059	0.249	0.095	2.51E-22	7.57E-26	11.85071013	25.12079229	black
PRKCE	1.13E-26	0.405689125	0.81	0.526	2.56E-22	7.72E-26	10.18775339	25.11221713	black
RPL35	1.15E-26	0.404253246	0.366	0.165	2.60E-22	7.83E-26	10.14919304	25.10602734	black
RCAN3	1.15E-26	0.52684901	0.228	0.082	2.61E-22	7.85E-26	13.22659846	25.10510263	black
SWT1	1.18E-26	0.323446615	0.473	0.232	2.67E-22	8.03E-26	8.116998989	25.09532833	black
PDE10A	1.23E-26	0.500125478	0.877	0.689	2.78E-22	8.37E-26	12.54182275	25.07735221	black
RP9	1.26E-26	0.359780739	0.582	0.316	2.86E-22	8.59E-26	9.018310877	25.0661303	black
DLAT	1.27E-26	0.346566886	0.533	0.276	2.88E-22	8.65E-26	8.685965464	25.06288346	black
BET1L	1.30E-26	0.762023282	0.161	0.045	2.94E-22	8.83E-26	19.09186109	25.05417032	black
FABP3	1.31E-26	0.765289612	0.146	0.037	2.96E-22	8.88E-26	19.1716837	25.05154049	black
ZFP553	1.31E-26	0.748722594	0.128	0.028	2.97E-22	8.90E-26	18.75593088	25.05057417	black
LZTFL1	1.33E-26	0.354485148	0.446	0.216	3.01E-22	9.02E-26	8.878059213	25.04493983	black
LMO1	1.35E-26	0.656735896	0.176	0.053	3.04E-22	9.10E-26	16.44516805	25.0407632	black
ADD2	1.40E-26	0.353315997	0.524	0.273	3.18E-22	9.49E-26	8.840928048	25.02272221	black
ACTR1A	1.43E-26	0.362986603	0.353	0.157	3.23E-22	9.66E-26	9.080121176	25.01503113	black
SGMS1	1.48E-26	0.328048353	0.604	0.328	3.34E-22	9.98E-26	8.201488372	25.00085212	black
BLMH	1.48E-26	0.38491122	0.383	0.176	3.35E-22	9.99E-26	9.623006298	25.0005866	black
TRANK1	1.60E-26	-1.154571048	0.476	0.517	3.61E-22	1.08E-25	28.82772128	24.96833896	blue
GUCY1B1	1.64E-26	0.409362953	0.456	0.228	3.71E-22	1.10E-25	10.21641108	24.95685308	black
SYNJ1	1.68E-26	0.299901267	0.589	0.309	3.81E-22	1.13E-25	7.481297185	24.94586724	black
MAN1B1	1.75E-26	0.407757465	0.346	0.155	3.95E-22	1.17E-25	10.16566775	24.93067233	black
PSMA6	1.75E-26	0.52005735	0.212	0.073	3.96E-22	1.18E-25	12.96493343	24.92981482	black
MEAF6	1.76E-26	0.380486613	0.32	0.137	3.98E-22	1.18E-25	9.48461179	24.92758341	black
GM29536	1.82E-26	0.885515178	0.111	0.02	4.12E-22	1.22E-25	22.06117869	24.91338289	black
THOC3	1.95E-26	0.871822804	0.127	0.028	4.40E-22	1.30E-25	21.69519809	24.8848711	black
N4BP2L1	2.00E-26	0.346384066	0.488	0.246	4.51E-22	1.34E-25	8.615997262	24.87411552	black
TOMM6	2.14E-26	0.424803316	0.327	0.142	4.83E-22	1.43E-25	10.55407441	24.84461402	black
UTP3	2.15E-26	0.829411918	0.129	0.029	4.85E-22	1.43E-25	20.60556083	24.84357939	black
MED6	2.15E-26	0.397927432	0.289	0.119	4.86E-22	1.44E-25	9.885548685	24.8425916	black
VDAC3	2.20E-26	0.353791928	0.436	0.212	4.98E-22	1.47E-25	8.78575577	24.83311536	black
UBA2	2.21E-26	0.376425596	0.312	0.133	5.00E-22	1.47E-25	9.347186305	24.83143122	black
ABLIM2	2.22E-26	0.343822787	0.55	0.287	5.01E-22	1.48E-25	8.537455739	24.83097705	black
TAF8	2.28E-26	0.847056432	0.132	0.03	5.15E-22	1.52E-25	21.02313897	24.81905358	black
X3830406C13RIK	2.28E-26	0.493911206	0.245	0.092	5.16E-22	1.52E-25	12.25820495	24.81864108	black
FCF1	2.48E-26	0.598349287	0.196	0.065	5.60E-22	1.65E-25	14.82921406	24.78354095	black
UPF3B	2.52E-26	0.306277863	0.435	0.207	5.70E-22	1.67E-25	7.588389958	24.776162	black
ARID4A	2.58E-26	0.304881416	0.477	0.239	5.83E-22	1.71E-25	7.550823807	24.76642853	black
CCT6A	2.81E-26	0.455862134	0.26	0.101	6.36E-22	1.87E-25	11.27311099	24.72921118	black
RETREG1	3.02E-26	0.335781366	0.363	0.165	6.82E-22	2.00E-25	8.29357795	24.69933948	black
MRPL47	3.20E-26	0.610576252	0.187	0.06	7.24E-22	2.12E-25	15.06533171	24.67395622	black
RPP21	3.25E-26	0.378664204	0.292	0.121	7.34E-22	2.15E-25	9.341009287	24.66831873	black
PPM1D	3.27E-26	0.604687101	0.213	0.074	7.39E-22	2.16E-25	14.91482143	24.66535404	black
TTC3	3.49E-26	0.237712984	0.996	0.951	7.90E-22	2.31E-25	5.856547051	24.63705156	black
ATOX1	3.54E-26	0.662963114	0.166	0.048	8.01E-22	2.34E-25	16.32957992	24.63120434	black
2-Mar	3.59E-26	0.554357415	0.189	0.06	8.12E-22	2.37E-25	13.65123442	24.62533025	black
ARID1B	3.64E-26	0.327782958	0.605	0.335	8.22E-22	2.40E-25	8.070238694	24.62067807	black
MYNN	3.65E-26	0.516800153	0.228	0.083	8.26E-22	2.41E-25	12.72295477	24.61871325	black
MRPL38	3.81E-26	0.411431878	0.332	0.147	8.61E-22	2.50E-25	10.12175838	24.60129835	black
RALBP1	3.85E-26	0.276312816	0.432	0.208	8.69E-22	2.53E-25	6.796565085	24.59735736	black
TSPAN2	3.86E-26	0.706851888	0.181	0.056	8.72E-22	2.53E-25	17.38576123	24.59604553	black
SUCLG1	4.08E-26	0.293322098	0.413	0.194	9.22E-22	2.68E-25	7.207558536	24.57216344	black
NOS1AP	4.11E-26	0.410873659	0.442	0.227	9.29E-22	2.70E-25	10.09491054	24.56937874	black
HBB.BS	4.18E-26	0.608273065	0.117	0.023	9.44E-22	2.74E-25	14.94080964	24.56266847	black
CEND1	4.29E-26	0.381265895	0.334	0.148	9.70E-22	2.81E-25	9.360514356	24.55114521	black
KIF3C	4.40E-26	0.354367837	0.456	0.23	9.96E-22	2.88E-25	8.696331065	24.54040735	black
RWDD1	4.46E-26	0.518387749	0.203	0.068	1.01E-21	2.91E-25	12.71893814	24.53556853	black
IKBKB	4.48E-26	0.411702913	0.296	0.124	1.01E-21	2.93E-25	10.10051655	24.53350761	black
EIF5A	4.68E-26	0.462072695	0.289	0.12	1.06E-21	3.06E-25	11.32763191	24.5148264	black
MON1A	5.07E-26	0.640882221	0.149	0.039	1.15E-21	3.31E-25	15.68923931	24.48069053	black
TTC9C	5.17E-26	0.551025188	0.195	0.064	1.17E-21	3.37E-25	13.48501001	24.47258366	black
GNL3	5.35E-26	0.411187672	0.345	0.155	1.21E-21	3.48E-25	10.05693831	24.45826807	black
VPS37A	5.45E-26	0.37925678	0.361	0.163	1.23E-21	3.55E-25	9.272961495	24.45035127	black
SCRN1	5.48E-26	0.357041649	0.311	0.134	1.24E-21	3.56E-25	8.729159272	24.44857425	black
ST3GAL5	5.49E-26	0.388684303	0.422	0.206	1.24E-21	3.56E-25	9.502575593	24.44805595	black
CEP57	5.54E-26	0.551993876	0.196	0.065	1.25E-21	3.59E-25	13.49315969	24.44440109	black
RTL8B	5.73E-26	0.55800269	0.208	0.072	1.30E-21	3.72E-25	13.63188347	24.42978093	black
KIF1A	5.78E-26	0.376161665	0.743	0.456	1.31E-21	3.75E-25	9.188201181	24.42620297	black
PPP3CC	6.34E-26	0.346764285	0.421	0.205	1.43E-21	4.11E-25	8.45633647	24.38641131	black
SPATS2	6.70E-26	0.42304751	0.316	0.138	1.51E-21	4.33E-25	10.30675514	24.36311503	black
PPP1R16B	7.23E-26	0.411957106	0.345	0.157	1.63E-21	4.67E-25	10.02303994	24.33029989	black
X1700016P03RIK	7.46E-26	0.843710272	0.15	0.041	1.69E-21	4.82E-25	20.51659314	24.31710722	black
DHX30	7.51E-26	0.304776726	0.668	0.37	1.70E-21	4.85E-25	7.410505542	24.31453885	black
RBKS	7.59E-26	0.621872465	0.151	0.041	1.72E-21	4.90E-25	15.11764815	24.30988506	black
PPME1	7.72E-26	0.376876675	0.424	0.206	1.75E-21	4.98E-25	9.159137112	24.30274337	black
D10WSU102E	7.89E-26	0.491775549	0.233	0.087	1.78E-21	5.08E-25	11.94706316	24.29373153	black
X2700062C07RIK	8.36E-26	0.470535538	0.253	0.099	1.89E-21	5.38E-25	11.41942029	24.26898579	black
H2AFY	8.48E-26	0.447689982	0.344	0.156	1.92E-21	5.45E-25	10.86247615	24.26338893	black
SMIM20	8.48E-26	0.615363772	0.158	0.045	1.92E-21	5.45E-25	14.93079045	24.26335628	black
LYRM9	8.55E-26	0.627302525	0.157	0.044	1.93E-21	5.49E-25	15.21864744	24.2604594	black
NDUFAF4	8.55E-26	0.379450622	0.356	0.162	1.93E-21	5.49E-25	9.205646404	24.2604594	black
TMEM184B	8.56E-26	0.56928402	0.217	0.078	1.94E-21	5.49E-25	13.81093871	24.26019037	black
SLC48A1	9.08E-26	0.486793167	0.278	0.115	2.05E-21	5.82E-25	11.7974538	24.23504394	black
SIGMAR1	9.43E-26	0.506358213	0.217	0.077	2.13E-21	6.04E-25	12.26341722	24.21885715	black
NAALADL2	9.71E-26	-0.691787518	0.823	0.765	2.19E-21	6.21E-25	16.74612442	24.20703466	black
ME2	9.71E-26	0.413936329	0.249	0.096	2.19E-21	6.21E-25	10.02017107	24.20703466	black
CIAPIN1	9.73E-26	0.446996528	0.268	0.109	2.20E-21	6.22E-25	10.82021337	24.2064819	black
EFCAB14	9.84E-26	0.316564162	0.375	0.173	2.22E-21	6.28E-25	7.66140629	24.20174869	black
LRRC8B	9.89E-26	0.557471734	0.229	0.086	2.24E-21	6.31E-25	13.49079411	24.19996078	black
ZFP641	1.05E-25	0.460691577	0.328	0.147	2.37E-21	6.69E-25	11.1371078	24.1747589	black
BPNT1	1.06E-25	0.624317111	0.181	0.057	2.39E-21	6.74E-25	15.09053634	24.17126819	black
EIF3F	1.09E-25	0.510592668	0.216	0.077	2.46E-21	6.92E-25	12.33570541	24.15958196	black
GNA12	1.10E-25	0.560879433	0.198	0.067	2.49E-21	7.02E-25	13.5474264	24.15390117	black
CNIH2	1.11E-25	0.575860839	0.2	0.068	2.51E-21	7.05E-25	13.90810658	24.15185341	black
TAF11	1.13E-25	0.515721127	0.206	0.071	2.55E-21	7.16E-25	12.452215	24.14524894	black
UBR7	1.20E-25	0.607768414	0.18	0.057	2.71E-21	7.60E-25	14.65876076	24.11899074	black
SNRNP40	1.27E-25	0.502291455	0.263	0.105	2.87E-21	8.05E-25	12.10237982	24.09433745	black
IFFO1	1.29E-25	0.361976928	0.29	0.121	2.91E-21	8.16E-25	8.719508608	24.08857565	black
AMER2	1.31E-25	0.373624593	0.276	0.111	2.95E-21	8.27E-25	8.997828867	24.0825391	black
PSMC2	1.35E-25	0.443338558	0.248	0.096	3.05E-21	8.55E-25	10.67029557	24.06805223	black
DDR1	1.40E-25	0.38381426	0.309	0.135	3.16E-21	8.85E-25	9.2319484	24.05316674	black
SH3D19	1.40E-25	0.388318328	0.405	0.199	3.17E-21	8.85E-25	9.340283785	24.05316233	black
ADD3	1.52E-25	0.4479383	0.254	0.1	3.44E-21	9.60E-25	10.75841989	24.01763791	black
MICU2	1.53E-25	0.340889335	0.407	0.194	3.47E-21	9.67E-25	8.186264504	24.01443417	black
EIF3M	1.55E-25	0.525656762	0.217	0.078	3.50E-21	9.75E-25	12.62155927	24.01102808	black
WDR45B	1.57E-25	0.470139741	0.276	0.114	3.55E-21	9.89E-25	11.2855658	24.004705	black
ZSCAN22	1.60E-25	0.599061259	0.146	0.039	3.61E-21	1.01E-24	14.37608074	23.9976806	black
UQCRC2	1.77E-25	0.330174142	0.464	0.231	3.99E-21	1.11E-24	7.909062281	23.95421465	black
GON4L	1.84E-25	0.322577523	0.611	0.332	4.17E-21	1.16E-24	7.721130228	23.93573536	black
IDH2	1.87E-25	0.4393137	0.278	0.114	4.23E-21	1.17E-24	10.51293301	23.9303555	black
SLC44A2	1.91E-25	0.418328859	0.309	0.135	4.31E-21	1.20E-24	10.00734426	23.92219434	black
BRI3	1.92E-25	0.567498209	0.22	0.081	4.33E-21	1.20E-24	13.57456684	23.92001708	black
PIGT	1.93E-25	0.601303226	0.187	0.061	4.36E-21	1.21E-24	14.38187418	23.91783971	black
FYN	1.97E-25	0.3274013	0.56	0.301	4.46E-21	1.24E-24	7.827532274	23.90806714	black
TMEM218	2.10E-25	0.715734939	0.16	0.047	4.75E-21	1.31E-24	17.09264233	23.88124626	black
TMEM147	2.16E-25	0.32681021	0.454	0.225	4.89E-21	1.35E-24	7.800487855	23.86855614	black
PXK	2.35E-25	0.412618875	0.426	0.211	5.31E-21	1.47E-24	9.833968538	23.83305548	black
FAM155A	2.40E-25	-0.287039524	0.994	0.989	5.42E-21	1.50E-24	6.838626037	23.8246843	black
DGAT1	2.42E-25	0.404996536	0.336	0.153	5.47E-21	1.51E-24	9.647588505	23.82140995	black
DHDDS	2.48E-25	0.331257877	0.422	0.205	5.61E-21	1.55E-24	7.887276167	23.81007885	black
PPP1R9B	2.51E-25	0.578772282	0.192	0.064	5.67E-21	1.56E-24	13.77839964	23.80625346	black
TSPYL4	2.59E-25	0.359539823	0.407	0.195	5.86E-21	1.61E-24	8.554271497	23.79227821	black
IARS2	2.64E-25	0.509571999	0.262	0.105	5.97E-21	1.64E-24	12.11992684	23.78452281	black
ARL2BP	2.75E-25	0.489038487	0.297	0.128	6.22E-21	1.71E-24	11.62306796	23.76718454	black
KIRREL	2.76E-25	0.490786914	0.25	0.099	6.23E-21	1.71E-24	11.66433218	23.76659166	black
LRRC24	2.90E-25	0.357025251	0.275	0.112	6.56E-21	1.80E-24	8.47740321	23.744548	black
NAPG	3.04E-25	0.332102499	0.445	0.22	6.87E-21	1.88E-24	7.879106165	23.72492286	black
LGI2	3.04E-25	0.489656962	0.336	0.155	6.88E-21	1.89E-24	11.61695267	23.72467577	black
GM43847	3.05E-25	0.830676434	0.127	0.029	6.90E-21	1.89E-24	19.70658671	23.72354132	black
SYT5	3.05E-25	0.59488095	0.203	0.071	6.90E-21	1.89E-24	14.1126828	23.72354132	black
SH3BGRL3	3.35E-25	0.691597859	0.172	0.054	7.56E-21	2.07E-24	16.37991588	23.6841622	black
GLRX5	3.44E-25	0.597366081	0.17	0.052	7.77E-21	2.12E-24	14.14123869	23.6726509	black
ATXN10	3.69E-25	0.308732094	0.699	0.4	8.35E-21	2.28E-24	7.298977842	23.64178514	black
OLA1	3.72E-25	0.306726649	0.44	0.216	8.40E-21	2.29E-24	7.25092695	23.6397032	black
RPL5	4.01E-25	0.32787309	0.345	0.156	9.06E-21	2.47E-24	7.740169088	23.60721059	black
ANKRD29	4.20E-25	0.603366984	0.226	0.086	9.50E-21	2.59E-24	14.23137836	23.58660442	black
CSAD	4.33E-25	0.623596864	0.198	0.069	9.79E-21	2.67E-24	14.70066612	23.57398982	black
RNF34	4.58E-25	0.341909469	0.309	0.135	1.03E-20	2.81E-24	8.052219498	23.55073558	black
MRPL40	4.58E-25	0.657577758	0.143	0.038	1.03E-20	2.81E-24	15.48643991	23.55073558	black
PTPRF	5.07E-25	0.416070599	0.362	0.17	1.15E-20	3.12E-24	9.780355928	23.50648174	black
PFKM	5.16E-25	0.449251273	0.342	0.157	1.17E-20	3.17E-24	10.55696719	23.49902563	black
GTF3C1	5.22E-25	0.270245461	0.359	0.163	1.18E-20	3.20E-24	6.349434746	23.49506531	black
CCDC93	5.22E-25	0.460423219	0.284	0.12	1.18E-20	3.20E-24	10.81767361	23.49506531	black
PPM1L	5.37E-25	0.35144923	0.696	0.422	1.21E-20	3.29E-24	8.252898008	23.4824757	black
RPAP3	5.54E-25	0.610760893	0.181	0.059	1.25E-20	3.39E-24	14.33436187	23.46967861	black
PDAP1	5.66E-25	0.635975144	0.223	0.084	1.28E-20	3.46E-24	14.92058559	23.46095713	black
RNF14	5.66E-25	0.288726113	0.495	0.25	1.28E-20	3.46E-24	6.773790968	23.46095713	black
SOGA1	6.02E-25	0.423196661	0.298	0.128	1.36E-20	3.68E-24	9.917286412	23.43422652	black
SEC24A	6.07E-25	0.297972733	0.501	0.255	1.37E-20	3.71E-24	6.981816504	23.4310584	black
PPP2R1A	6.13E-25	0.435413271	0.28	0.117	1.39E-20	3.74E-24	10.20048566	23.42713542	black
NPM1	6.31E-25	0.348471583	0.401	0.194	1.43E-20	3.84E-24	8.159511835	23.4151427	black
MAN1A2	6.40E-25	0.283231244	0.541	0.285	1.45E-20	3.90E-24	6.630199048	23.40913719	black
SRSF4	6.42E-25	0.482048149	0.265	0.109	1.45E-20	3.91E-24	11.283939	23.40832347	black
TMEM184C	6.58E-25	0.44108209	0.225	0.084	1.49E-20	4.00E-24	10.32036219	23.39782643	black
DFFB	6.61E-25	0.500606724	0.211	0.075	1.50E-20	4.02E-24	11.71207669	23.39576385	black
NIPSNAP1	6.69E-25	0.30313468	0.413	0.199	1.51E-20	4.06E-24	7.090762091	23.39145783	black
GRIA4	6.71E-25	-0.317102133	0.99	0.971	1.52E-20	4.07E-24	7.417101463	23.39026037	black
ATP6V1C1	7.00E-25	0.280224907	0.356	0.163	1.58E-20	4.24E-24	6.549460945	23.37215851	black
BMYC	7.30E-25	0.51027333	0.274	0.116	1.65E-20	4.42E-24	11.917128	23.35440105	black
KCTD17	7.67E-25	0.48325421	0.217	0.079	1.73E-20	4.65E-24	11.27574316	23.33294344	black
NIPA1	7.79E-25	0.375674549	0.38	0.18	1.76E-20	4.71E-24	8.763235636	23.32666844	black
RPS10	7.85E-25	0.34119055	0.366	0.172	1.77E-20	4.75E-24	7.957758834	23.32350307	black
ZRSR2	8.47E-25	0.668070685	0.149	0.041	1.91E-20	5.12E-24	15.55990443	23.29080556	black
GAD2	8.51E-25	0.339862959	0.881	0.642	1.92E-20	5.14E-24	7.91519843	23.28938245	black
FBXW8	8.88E-25	0.265117379	0.316	0.136	2.01E-20	5.36E-24	6.169482027	23.27075675	black
REXO1	8.99E-25	0.498084107	0.221	0.081	2.03E-20	5.42E-24	11.58839576	23.26594163	black
CEBPG	9.06E-25	0.497995329	0.195	0.067	2.05E-20	5.46E-24	11.58491384	23.2630974	black
GM9856	9.20E-25	0.462161854	0.271	0.111	2.08E-20	5.54E-24	10.74816929	23.25628827	black
SPOCK3	9.23E-25	-0.707453978	0.775	0.74	2.09E-20	5.55E-24	16.45227997	23.25561873	black
RPS24	9.31E-25	0.301359939	0.558	0.297	2.10E-20	5.60E-24	7.007205802	23.2519486	black
TAF3	9.42E-25	0.337731243	0.469	0.24	2.13E-20	5.66E-24	7.851235312	23.24699145	black
DDX5	9.90E-25	0.309317734	0.72	0.42	2.24E-20	5.94E-24	7.184232772	23.22606166	black
NTN3	1.00E-24	0.700371914	0.119	0.026	2.26E-20	6.00E-24	16.26399344	23.22193841	black
AURKAIP1	1.01E-24	0.523708313	0.183	0.06	2.29E-20	6.08E-24	12.1583876	23.21595305	black
SUSD4	1.05E-24	0.341730414	0.605	0.332	2.37E-20	6.27E-24	7.929106619	23.20281221	black
IGSF9B	1.06E-24	0.311801074	0.503	0.264	2.40E-20	6.35E-24	7.232864442	23.19704787	black
WDR12	1.06E-24	0.320471257	0.366	0.171	2.40E-20	6.35E-24	7.433982208	23.19703263	black
PDCD11	1.12E-24	0.466658158	0.254	0.103	2.54E-20	6.71E-24	10.81399229	23.17326313	black
INTS3	1.13E-24	0.287135638	0.36	0.165	2.55E-20	6.73E-24	6.653520843	23.17204817	black
X5430400D12RIK	1.15E-24	0.724852182	0.103	0.018	2.60E-20	6.87E-24	16.78993725	23.16325681	black
ITCH	1.16E-24	0.333630716	0.695	0.406	2.61E-20	6.90E-24	7.727338943	23.16135349	black
X4930555F03RIK	1.18E-24	0.793344676	0.203	0.074	2.68E-20	7.06E-24	18.36708911	23.15146201	black
LMAN1	1.19E-24	0.43315934	0.245	0.096	2.69E-20	7.10E-24	10.02701113	23.14855114	black
RINT1	1.25E-24	0.507893761	0.233	0.089	2.84E-20	7.47E-24	11.74588344	23.12665431	black
AGBL4	1.26E-24	-0.400508082	0.945	0.892	2.84E-20	7.48E-24	9.262224618	23.12618655	black
H13	1.33E-24	0.313401235	0.424	0.207	3.01E-20	7.90E-24	7.240247133	23.10216528	black
NDUFV2	1.33E-24	0.351459581	0.411	0.201	3.02E-20	7.93E-24	8.119052577	23.10095676	black
DDX50	1.37E-24	0.302598838	0.593	0.322	3.09E-20	8.11E-24	6.987384207	23.09124603	black
SEM1	1.38E-24	0.335848493	0.325	0.144	3.12E-20	8.19E-24	7.753706311	23.08691706	black
EIF3C	1.43E-24	0.368117763	0.255	0.101	3.24E-20	8.49E-24	8.492899939	23.07114948	black
X4732463B04RIK	1.45E-24	0.689498307	0.181	0.06	3.29E-20	8.62E-24	15.90296349	23.06454318	black
RBMX	1.46E-24	0.401876088	0.266	0.109	3.30E-20	8.64E-24	9.268654298	23.06346305	black
COQ3	1.47E-24	0.398447486	0.324	0.147	3.32E-20	8.68E-24	9.188767175	23.06142593	black
MYO9B	1.49E-24	0.269207789	0.376	0.176	3.37E-20	8.82E-24	6.206495391	23.05466499	black
MRPS12	1.51E-24	0.636668985	0.18	0.059	3.42E-20	8.94E-24	14.67424981	23.04847598	black
MICOS13	1.53E-24	0.625057047	0.205	0.074	3.46E-20	9.04E-24	14.40362174	23.04369148	black
IFNAR1	1.56E-24	0.592848543	0.187	0.062	3.52E-20	9.20E-24	13.65711739	23.03643579	black
UQCRH	1.57E-24	0.289623799	0.462	0.234	3.55E-20	9.25E-24	6.671086479	23.03362675	black
BSCL2	1.64E-24	0.273041838	0.522	0.272	3.70E-20	9.65E-24	6.284182338	23.01545576	black
GLT8D1	1.69E-24	0.293438581	0.421	0.203	3.82E-20	9.94E-24	6.749852515	23.0026075	black
PHB2	1.80E-24	0.440355226	0.263	0.108	4.08E-20	1.06E-23	10.11673545	22.97403292	black
CCDC186	1.81E-24	0.446953975	0.274	0.116	4.08E-20	1.06E-23	10.26833533	22.97403292	black
SLC1A2	1.82E-24	0.404374033	0.278	0.117	4.12E-20	1.07E-23	9.288615528	22.97035606	black
JAGN1	1.83E-24	0.476996163	0.2	0.07	4.14E-20	1.07E-23	10.95596708	22.96866919	black
SAMD10	1.84E-24	0.46502967	0.176	0.056	4.16E-20	1.08E-23	10.68035046	22.96703018	black
GIPC1	1.89E-24	0.599009073	0.153	0.044	4.26E-20	1.11E-23	13.75106762	22.95635949	black
RSRP1	2.02E-24	-0.408010311	0.937	0.892	4.57E-20	1.18E-23	9.354191616	22.92636083	black
GLRX3	2.02E-24	0.301778264	0.3	0.129	4.57E-20	1.18E-23	6.918677379	22.92636083	black
PKM	2.04E-24	0.328991828	0.688	0.402	4.62E-20	1.20E-23	7.5413138	22.92249579	black
BCL2	2.14E-24	0.430434554	0.466	0.248	4.84E-20	1.25E-23	9.857887976	22.90217616	black
SLC4A10	2.14E-24	-0.639543331	0.78	0.729	4.85E-20	1.25E-23	14.64693402	22.90217616	black
EMC9	2.20E-24	0.402197003	0.266	0.11	4.97E-20	1.28E-23	9.207040269	22.89186693	black
CDC40	2.27E-24	0.381928085	0.262	0.106	5.14E-20	1.33E-23	8.737370634	22.8770048	black
FBXL16	2.45E-24	0.395456112	0.273	0.114	5.53E-20	1.43E-23	9.034551231	22.84590113	black
GM17106	2.49E-24	0.632152891	0.143	0.039	5.63E-20	1.45E-23	14.43732817	22.83834872	black
HOOK2	2.52E-24	0.295895865	0.317	0.14	5.71E-20	1.47E-23	6.756123903	22.83277569	black
PRDX6	2.72E-24	0.518929006	0.189	0.065	6.16E-20	1.58E-23	11.83162218	22.80007871	black
SLC25A11	2.73E-24	0.442323338	0.211	0.076	6.18E-20	1.59E-23	10.08445453	22.79882987	black
FBXW2	2.85E-24	0.28567052	0.366	0.172	6.44E-20	1.66E-23	6.507871708	22.78104056	black
HRH2	2.88E-24	0.511750335	0.171	0.054	6.50E-20	1.67E-23	11.65632059	22.77735801	black
RPS26	2.93E-24	0.370805224	0.366	0.173	6.63E-20	1.70E-23	8.44277877	22.76876977	black
MANBA	2.94E-24	0.524250014	0.313	0.143	6.65E-20	1.71E-23	11.9362166	22.76817605	black
FMN1	2.96E-24	0.31628052	0.482	0.256	6.70E-20	1.72E-23	7.20024425	22.76537376	black
FSD1L	2.97E-24	0.350960614	0.381	0.184	6.71E-20	1.72E-23	7.989506575	22.76468141	black
MRPL52	3.22E-24	0.451674088	0.213	0.079	7.28E-20	1.86E-23	10.26649812	22.72988068	black
PER2	3.29E-24	0.626390628	0.201	0.072	7.43E-20	1.90E-23	14.23224011	22.72102979	black
HIP1	3.46E-24	0.490199489	0.296	0.13	7.83E-20	2.00E-23	11.12690786	22.69873412	black
SLC1A1	3.57E-24	0.364924527	0.436	0.218	8.08E-20	2.06E-23	8.278470335	22.68543146	black
BCR	3.61E-24	0.247617176	0.376	0.178	8.17E-20	2.09E-23	5.616175493	22.68088013	black
PRKCZ	3.71E-24	0.278381261	0.581	0.315	8.39E-20	2.14E-23	6.310821076	22.66970502	black
SNX9	3.82E-24	0.597207962	0.208	0.077	8.64E-20	2.20E-23	13.5310661	22.65720981	black
YIPF3	3.86E-24	0.643637108	0.175	0.057	8.71E-20	2.22E-23	14.58083898	22.65381967	black
ZFP704	3.86E-24	0.291981228	0.606	0.337	8.72E-20	2.22E-23	6.614490079	22.65381967	black
HRAS	3.88E-24	0.447227638	0.219	0.081	8.77E-20	2.23E-23	10.13035298	22.65144664	black
GTF2H5	4.00E-24	0.490474536	0.209	0.077	9.04E-20	2.30E-23	11.10367756	22.63864227	black
RHOU	4.05E-24	0.697118584	0.114	0.024	9.16E-20	2.33E-23	15.77784307	22.63294	black
CHN1	4.08E-24	0.266752831	0.571	0.306	9.23E-20	2.34E-23	6.036628423	22.63004449	black
GSE1	4.21E-24	0.307033238	0.528	0.281	9.51E-20	2.41E-23	6.944362236	22.61762372	black
MINPP1	4.30E-24	0.348510484	0.287	0.122	9.71E-20	2.46E-23	7.87936759	22.60869601	black
MED4	4.30E-24	0.528566959	0.15	0.043	9.72E-20	2.46E-23	11.95001896	22.60833514	black
ABAT	4.35E-24	0.297988719	0.588	0.326	9.83E-20	2.49E-23	6.735714346	22.60392398	black
MAX	4.36E-24	0.448738077	0.213	0.079	9.86E-20	2.50E-23	10.14276737	22.60286768	black
CLCC1	4.41E-24	0.508194635	0.196	0.069	9.96E-20	2.52E-23	11.48454456	22.59871274	black
CITED2	4.66E-24	0.811623082	0.123	0.029	1.05E-19	2.66E-23	18.32211228	22.57465649	black
AKR1B10	4.71E-24	0.683257924	0.169	0.054	1.07E-19	2.69E-23	15.4213059	22.5702555	black
BDH1	4.74E-24	0.538539171	0.204	0.074	1.07E-19	2.71E-23	12.15348632	22.56750666	black
WASF3	4.94E-24	0.226970755	0.421	0.206	1.12E-19	2.82E-23	5.118294333	22.55045733	black
SLC25A25	5.00E-24	0.345892527	0.247	0.098	1.13E-19	2.85E-23	7.798227261	22.54523201	black
RAB11B	5.01E-24	0.419033257	0.235	0.092	1.13E-19	2.85E-23	9.447061676	22.54489713	black
CCT2	5.17E-24	0.599914013	0.189	0.065	1.17E-19	2.94E-23	13.51704635	22.53163964	black
RILPL1	5.31E-24	0.53548825	0.162	0.05	1.20E-19	3.02E-23	12.05936295	22.52031289	black
MIEN1	5.78E-24	0.757298281	0.149	0.043	1.31E-19	3.29E-23	17.02660509	22.48335367	black
TMSB10	5.90E-24	0.358043772	0.541	0.292	1.33E-19	3.35E-23	8.047066256	22.47509073	black
GALNTL6	6.07E-24	-0.656725231	0.93	0.93	1.37E-19	3.45E-23	14.75173045	22.46256084	black
ZFP961	6.24E-24	0.47695173	0.248	0.1	1.41E-19	3.54E-23	10.70819364	22.45131522	black
DIXDC1	6.41E-24	0.301964832	0.418	0.207	1.45E-19	3.63E-23	6.776118279	22.44009093	black
RNF170	6.46E-24	0.297376462	0.371	0.175	1.46E-19	3.66E-23	6.672062295	22.43641698	black
CSTB	6.62E-24	0.772640124	0.11	0.023	1.50E-19	3.75E-23	17.32728702	22.42607713	black
VPS28	6.66E-24	0.349216709	0.3	0.132	1.51E-19	3.77E-23	7.830756536	22.42377391	black
METTL16	6.67E-24	0.383755678	0.373	0.179	1.51E-19	3.77E-23	8.605155329	22.42352574	black
TUSC3	7.03E-24	0.294996058	0.654	0.373	1.59E-19	3.97E-23	6.608328101	22.40141157	black
UBE2F	7.52E-24	0.362081504	0.26	0.106	1.70E-19	4.24E-23	8.10059346	22.37229287	black
ATP5G2	7.55E-24	0.337372772	0.302	0.133	1.71E-19	4.26E-23	7.547279098	22.3707416	black
ST3GAL2	7.71E-24	0.611825054	0.176	0.058	1.74E-19	4.34E-23	13.68171326	22.36213304	black
KLC2	7.84E-24	0.297695574	0.464	0.236	1.77E-19	4.42E-23	6.654973826	22.35496394	black
PALM	7.84E-24	0.351563211	0.298	0.13	1.77E-19	4.42E-23	7.859182905	22.35496394	black
EIF3I	8.02E-24	0.511380246	0.185	0.063	1.81E-19	4.51E-23	11.42714065	22.34568257	black
USP46	8.07E-24	0.303110533	0.317	0.142	1.82E-19	4.54E-23	6.772468457	22.34323033	black
NDUFS2	8.15E-24	0.425577586	0.28	0.12	1.84E-19	4.58E-23	9.507049706	22.33916922	black
ZFP637	8.38E-24	0.650850903	0.151	0.044	1.89E-19	4.70E-23	14.53194124	22.32760404	black
TMEM38A	8.48E-24	0.223205102	0.47	0.237	1.92E-19	4.76E-23	4.982467324	22.32237202	black
RNF130	8.55E-24	0.299995742	0.734	0.437	1.93E-19	4.79E-23	6.695688663	22.31927902	black
NUDCD2	9.03E-24	0.490626576	0.192	0.067	2.04E-19	5.06E-23	10.9389658	22.29590966	black
AIFM1	9.18E-24	0.339276119	0.324	0.147	2.08E-19	5.14E-23	7.562109164	22.28895209	black
CNNM2	9.42E-24	0.361138829	0.307	0.136	2.13E-19	5.27E-23	8.045547465	22.27826758	black
OCIAD2	1.00E-23	0.446363939	0.246	0.099	2.27E-19	5.61E-23	9.931948682	22.25078646	black
POLR2J	1.06E-23	0.642601113	0.149	0.043	2.39E-19	5.92E-23	14.28371388	22.22796319	black
BC005561	1.08E-23	0.267601463	0.756	0.456	2.44E-19	6.04E-23	5.945882648	22.21917089	black
STX12	1.15E-23	0.329765495	0.362	0.172	2.60E-19	6.43E-23	7.318158569	22.19200821	black
SORT1	1.16E-23	0.33440957	0.513	0.276	2.63E-19	6.49E-23	7.419757841	22.1876361	black
SEC14L1	1.16E-23	0.499317418	0.22	0.084	2.63E-19	6.49E-23	11.07866395	22.18761763	black
GMIP	1.21E-23	0.5230357	0.186	0.064	2.74E-19	6.75E-23	11.59590304	22.17038537	black
UBE2J1	1.28E-23	0.473558163	0.199	0.071	2.89E-19	7.12E-23	10.48809361	22.14742441	black
MACROD2	1.29E-23	-0.371659171	0.985	0.953	2.91E-19	7.16E-23	8.230527711	22.14536422	black
RPS29	1.29E-23	0.286299184	0.696	0.4	2.92E-19	7.18E-23	6.339771373	22.14386812	black
UEVLD	1.31E-23	0.44947008	0.228	0.089	2.97E-19	7.29E-23	9.95003588	22.13725969	black
FGFR1OP	1.35E-23	0.433282939	0.217	0.081	3.05E-19	7.50E-23	9.586303281	22.12481133	black
XBP1	1.36E-23	0.464208727	0.222	0.085	3.08E-19	7.56E-23	10.26908821	22.12170433	black
PLEKHB2	1.42E-23	0.350252325	0.353	0.165	3.20E-19	7.86E-23	7.742205138	22.10465027	black
SRRM4	1.42E-23	0.34123315	0.495	0.266	3.21E-19	7.86E-23	7.542821998	22.10459915	black
PAX7	1.47E-23	0.665334312	0.195	0.07	3.32E-19	8.14E-23	14.69695734	22.08958275	black
UTP11	1.47E-23	0.32653437	0.268	0.114	3.33E-19	8.14E-23	7.212895086	22.08923699	black
EXT2	1.52E-23	0.291572758	0.375	0.18	3.43E-19	8.39E-23	6.436893661	22.07645769	black
BCL2L1	1.58E-23	0.323193076	0.312	0.14	3.56E-19	8.71E-23	7.129580774	22.05981905	black
CBFA2T2	1.60E-23	0.262046922	0.605	0.331	3.61E-19	8.82E-23	5.779354499	22.05465517	black
PHF6	1.63E-23	0.271368659	0.405	0.198	3.70E-19	9.02E-23	5.982225682	22.04464474	black
ERAL1	1.65E-23	0.62311706	0.142	0.04	3.73E-19	9.11E-23	13.73376695	22.04042842	black
C1QTNF4	1.67E-23	0.312506997	0.54	0.288	3.78E-19	9.23E-23	6.886090031	22.0349947	black
CYLD	1.70E-23	0.232518572	0.533	0.277	3.83E-19	9.34E-23	5.122326811	22.0297534	black
CCNH	1.70E-23	0.298546327	0.435	0.219	3.85E-19	9.38E-23	6.576305377	22.02775511	black
SH3GL3	1.71E-23	0.369521737	0.232	0.09	3.86E-19	9.40E-23	8.139455135	22.02699958	black
MRAS	1.79E-23	0.452561751	0.213	0.08	4.05E-19	9.85E-23	9.959270453	22.00643432	black
SYNDIG1L	1.80E-23	0.846331871	0.129	0.033	4.06E-19	9.87E-23	18.62415164	22.00573117	black
ZWINT	1.83E-23	0.319539868	0.772	0.473	4.14E-19	1.01E-22	7.029176359	21.99780708	black
GM14399	1.92E-23	0.588898264	0.157	0.048	4.34E-19	1.05E-22	12.94270034	21.97782051	black
MID1IP1	2.10E-23	0.795113934	0.108	0.023	4.74E-19	1.15E-22	17.44446572	21.93957994	black
PCGF5	2.10E-23	0.308008811	0.486	0.257	4.74E-19	1.15E-22	6.757552023	21.93947631	black
HIVEP3	2.10E-23	0.308850791	0.723	0.433	4.74E-19	1.15E-22	6.776024603	21.93947631	black
ACVR2B	2.15E-23	0.46221323	0.214	0.081	4.86E-19	1.18E-22	10.13587857	21.92901006	black
APBA2	2.25E-23	0.345367826	0.615	0.353	5.10E-19	1.23E-22	7.566645828	21.90894827	black
GM10516	2.26E-23	0.410742391	0.24	0.097	5.11E-19	1.23E-22	8.99874109	21.90847912	black
RRP1	2.26E-23	0.274598123	0.35	0.164	5.11E-19	1.24E-22	6.015901593	21.9080215	black
TPST1	2.28E-23	0.449691308	0.251	0.103	5.15E-19	1.24E-22	9.850719286	21.90551411	black
NAV3	2.31E-23	-0.460682255	0.896	0.871	5.21E-19	1.26E-22	10.08904205	21.90021851	black
SREBF2	2.38E-23	0.279114702	0.406	0.198	5.37E-19	1.30E-22	6.109093612	21.88739453	black
NDUFS7	2.45E-23	0.296647632	0.418	0.209	5.54E-19	1.34E-22	6.489019262	21.87450217	black
PITPNB	2.48E-23	0.328037674	0.248	0.1	5.61E-19	1.35E-22	7.173991569	21.8694136	black
PLS3	2.50E-23	0.407749775	0.299	0.134	5.64E-19	1.36E-22	8.916197115	21.86683514	black
ATG7	2.60E-23	0.569894187	0.186	0.065	5.88E-19	1.41E-22	12.45203441	21.84973051	black
MRPS25	2.63E-23	0.679047703	0.16	0.051	5.94E-19	1.43E-22	14.8340448	21.84536481	black
MLF2	2.65E-23	0.247150682	0.422	0.209	5.99E-19	1.44E-22	5.398320953	21.84222561	black
TSC22D4	2.67E-23	0.526524181	0.218	0.084	6.04E-19	1.45E-22	11.49865013	21.8387883	black
GM16083	2.68E-23	0.437511702	0.506	0.282	6.05E-19	1.45E-22	9.554497139	21.83826647	black
GNAZ	2.73E-23	0.479410579	0.214	0.081	6.17E-19	1.48E-22	10.46538856	21.82969884	black
SLC23A2	2.76E-23	0.259329565	0.555	0.294	6.24E-19	1.49E-22	5.660010154	21.82554906	black
SNX8	2.81E-23	0.504391388	0.212	0.08	6.35E-19	1.52E-22	11.00492686	21.8182291	black
PSMA4	2.88E-23	0.432284842	0.25	0.104	6.52E-19	1.56E-22	9.426838074	21.80700586	black
NOM1	2.90E-23	0.521069482	0.219	0.085	6.56E-19	1.57E-22	11.36154726	21.80428457	black
ZFP239	2.91E-23	0.322555682	0.256	0.106	6.59E-19	1.57E-22	7.032670066	21.80296448	black
PHLDB2	3.02E-23	0.936370029	0.102	0.02	6.82E-19	1.63E-22	20.40178415	21.78816443	black
BCAS2	3.03E-23	0.424310125	0.297	0.132	6.84E-19	1.63E-22	9.244382887	21.78685434	black
RHOBTB3	3.03E-23	0.318116618	0.297	0.131	6.86E-19	1.64E-22	6.930527565	21.78612234	black
GFER	3.05E-23	0.536103265	0.146	0.042	6.90E-19	1.64E-22	11.67848006	21.78401217	black
PLA2G3	3.09E-23	0.695428405	0.157	0.049	6.99E-19	1.67E-22	15.14537144	21.77847688	black
FBXL15	3.21E-23	0.56933323	0.158	0.049	7.25E-19	1.73E-22	12.39017945	21.76261423	black
PTPRE	3.38E-23	0.45241769	0.306	0.141	7.64E-19	1.82E-22	9.835722177	21.74035716	black
PRKACA	3.39E-23	0.261254496	0.453	0.228	7.67E-19	1.82E-22	5.67946528	21.73920587	black
HIKESHI	3.47E-23	0.529693065	0.172	0.056	7.84E-19	1.86E-22	11.51005614	21.72967118	black
LAGE3	3.48E-23	0.321154173	0.339	0.159	7.87E-19	1.87E-22	6.978180875	21.72844529	black
DESI1	3.52E-23	0.272630533	0.389	0.19	7.97E-19	1.89E-22	5.922451999	21.72336288	black
NUCKS1	3.58E-23	0.260993354	0.418	0.207	8.10E-19	1.92E-22	5.667885736	21.71659031	black
PDPR	3.71E-23	0.288201084	0.302	0.133	8.39E-19	1.99E-22	6.254353135	21.70135187	black
ZFP512	3.81E-23	0.286365243	0.376	0.181	8.61E-19	2.04E-22	6.211346908	21.6902961	black
MFHAS1	3.85E-23	0.351574722	0.315	0.143	8.71E-19	2.06E-22	7.624109713	21.68560263	black
SMAD7	4.16E-23	0.716005105	0.14	0.04	9.40E-19	2.22E-22	15.50369159	21.65304616	black
RCAN1	4.19E-23	0.52283341	0.198	0.072	9.46E-19	2.24E-22	11.31942712	21.65016027	black
TCTN2	4.22E-23	0.513327465	0.167	0.054	9.54E-19	2.25E-22	11.11199638	21.64699366	black
PHF3	4.36E-23	0.286806965	0.637	0.365	9.86E-19	2.33E-22	6.204430316	21.63277424	black
GALNT2	4.40E-23	0.406468614	0.256	0.106	9.94E-19	2.35E-22	8.791754615	21.62960266	black
LLGL1	4.59E-23	0.552185072	0.17	0.056	1.04E-18	2.44E-22	11.9337035	21.6117822	black
ZFP983	4.63E-23	0.335390718	0.318	0.144	1.05E-18	2.47E-22	7.247039842	21.60775318	black
COG7	4.70E-23	0.519665226	0.192	0.068	1.06E-18	2.50E-22	11.22578091	21.60194748	black
GSKIP	4.75E-23	0.451951097	0.181	0.062	1.07E-18	2.53E-22	9.760988623	21.59744423	black
CCNG1	4.80E-23	0.713171843	0.135	0.037	1.08E-18	2.55E-22	15.39968024	21.59322524	black
PRMT2	5.01E-23	0.380551442	0.318	0.146	1.13E-18	2.66E-22	8.210429215	21.57508373	black
SMG5	5.12E-23	0.34203076	0.391	0.192	1.16E-18	2.72E-22	7.376022633	21.56537801	black
CTNNBIP1	5.18E-23	0.369214113	0.271	0.116	1.17E-18	2.75E-22	7.960546671	21.56078654	black
NKAIN4	5.60E-23	0.805592303	0.114	0.026	1.26E-18	2.97E-22	17.34235379	21.52745715	black
CMPK1	5.65E-23	0.497427996	0.209	0.079	1.28E-18	3.00E-22	10.7063034	21.52332294	black
RPL13A	5.67E-23	0.276183128	0.696	0.401	1.28E-18	3.01E-22	5.944012014	21.52199543	black
RRBP1	5.72E-23	0.364715891	0.247	0.101	1.29E-18	3.03E-22	7.848222204	21.51872842	black
DNPEP	5.77E-23	0.71502094	0.117	0.028	1.30E-18	3.05E-22	15.38397737	21.51542216	black
COPS6	5.82E-23	0.598664085	0.176	0.06	1.31E-18	3.08E-22	12.87853616	21.51212423	black
FKBP8	6.04E-23	0.344702029	0.339	0.159	1.36E-18	3.19E-22	7.409715139	21.49600096	black
11-Mar	6.13E-23	0.32882793	0.386	0.193	1.39E-18	3.24E-22	7.066343652	21.48948737	black
GMPR2	6.23E-23	0.548896285	0.158	0.049	1.41E-18	3.29E-22	11.79209825	21.48329032	black
SNAP47	6.37E-23	0.346080771	0.417	0.211	1.44E-18	3.36E-22	7.431561318	21.4734881	black
CTHRC1	6.60E-23	0.62317131	0.17	0.056	1.49E-18	3.48E-22	13.37228827	21.45844657	black
NICN1	7.16E-23	0.296812736	0.238	0.095	1.62E-18	3.77E-22	6.35876472	21.42349012	black
SIPA1L2	7.48E-23	0.518103801	0.235	0.095	1.69E-18	3.94E-22	11.08981546	21.40462092	black
ZFP941	7.50E-23	0.365157528	0.302	0.136	1.69E-18	3.94E-22	7.815841811	21.40402759	black
TXNDC9	7.50E-23	0.533068842	0.177	0.06	1.70E-18	3.95E-22	11.40977044	21.40393422	black
SBDS	7.67E-23	0.464621244	0.23	0.091	1.73E-18	4.03E-22	9.940444401	21.3947264	black
X4430402I18RIK	7.72E-23	0.389639929	0.266	0.114	1.75E-18	4.06E-22	8.335100245	21.39180211	black
DCAF7	7.82E-23	0.349203137	0.322	0.149	1.77E-18	4.11E-22	7.46823796	21.38651453	black
TMOD3	8.12E-23	0.240206824	0.358	0.171	1.83E-18	4.26E-22	5.133425377	21.37085575	black
LIMK1	8.23E-23	0.434393793	0.35	0.169	1.86E-18	4.31E-22	9.280905232	21.36518839	black
HSF1	8.33E-23	0.408666904	0.226	0.089	1.88E-18	4.36E-22	8.729147573	21.36005507	black
ATRAID	8.45E-23	0.208158204	0.404	0.198	1.91E-18	4.42E-22	4.445089726	21.3543816	black
DPF3	8.49E-23	0.456941421	0.31	0.147	1.92E-18	4.44E-22	9.756769214	21.35234138	black
NKAIN2	8.81E-23	-0.522477881	0.936	0.921	1.99E-18	4.61E-22	11.14778111	21.33636945	black
LETMD1	8.82E-23	0.490189492	0.203	0.076	1.99E-18	4.61E-22	10.45876792	21.33617323	black
DNAJC25	8.84E-23	0.447007537	0.163	0.052	2.00E-18	4.62E-22	9.537147969	21.33554177	black
LEF1	8.94E-23	0.496469613	0.408	0.221	2.02E-18	4.67E-22	10.59008349	21.33077882	black
PFKFB4	9.86E-23	0.334904112	0.241	0.097	2.23E-18	5.14E-22	7.129750837	21.28893192	black
MARK3	9.93E-23	0.301207998	0.657	0.379	2.24E-18	5.18E-22	6.411491289	21.28592641	black
LAMTOR5	1.03E-22	0.534503459	0.17	0.056	2.32E-18	5.35E-22	11.36996582	21.27201544	black
SDHD	1.03E-22	0.668872267	0.141	0.041	2.32E-18	5.35E-22	14.22800941	21.271639	black
NELFE	1.03E-22	0.578674137	0.132	0.036	2.32E-18	5.35E-22	12.30933869	21.27162404	black
USF2	1.03E-22	0.460295655	0.205	0.077	2.33E-18	5.36E-22	9.79096164	21.27102771	black
RPL41	1.03E-22	0.284049693	0.734	0.434	2.33E-18	5.36E-22	6.041895486	21.27055809	black
STARD5	1.08E-22	0.553522701	0.263	0.116	2.43E-18	5.59E-22	11.7638638	21.25272149	black
MFAP3L	1.08E-22	0.556055296	0.177	0.061	2.44E-18	5.61E-22	11.81687359	21.25125624	black
ERI3	1.11E-22	0.250430184	0.455	0.231	2.50E-18	5.75E-22	5.319234193	21.24038769	black
DELE1	1.13E-22	0.442537611	0.195	0.071	2.55E-18	5.84E-22	9.39659076	21.2334286	black
FAM122A	1.13E-22	0.487407243	0.141	0.04	2.56E-18	5.87E-22	10.34832477	21.23137259	black
SGSM1	1.16E-22	0.299472486	0.418	0.211	2.63E-18	6.02E-22	6.354865564	21.22019841	black
AP2S1	1.20E-22	0.48412208	0.209	0.079	2.71E-18	6.19E-22	10.2672813	21.20804179	black
GM44644	1.20E-22	0.365644955	0.361	0.176	2.71E-18	6.20E-22	7.754545837	21.20785676	black
PEX14	1.21E-22	0.2891403	0.401	0.198	2.73E-18	6.25E-22	6.13102028	21.20430905	black
CADPS	1.26E-22	-0.338257763	0.983	0.954	2.85E-18	6.52E-22	7.166200419	21.18561994	black
ARPP19	1.29E-22	0.260125481	0.27	0.115	2.91E-18	6.66E-22	5.508617159	21.17676872	black
MCFD2	1.30E-22	0.561546247	0.168	0.055	2.93E-18	6.69E-22	11.89042587	21.17443743	black
CEP164	1.34E-22	0.22867375	0.433	0.217	3.02E-18	6.90E-22	4.83901315	21.16120959	black
PRPF31	1.37E-22	0.534474472	0.171	0.058	3.09E-18	7.04E-22	11.30551525	21.1525823	black
IFT57	1.39E-22	0.575887299	0.155	0.048	3.13E-18	7.14E-22	12.17805787	21.14659916	black
AMMECR1L	1.39E-22	0.354573174	0.298	0.134	3.14E-18	7.16E-22	7.497541077	21.14525755	black
TMEM44	1.59E-22	0.542175668	0.161	0.052	3.60E-18	8.19E-22	11.43263277	21.08658402	black
RXYLT1	1.62E-22	0.357349839	0.282	0.123	3.66E-18	8.32E-22	7.532894491	21.07988772	black
WDR5	1.62E-22	0.446772813	0.174	0.059	3.67E-18	8.33E-22	9.417662486	21.07930967	black
LSM1	1.63E-22	0.319117872	0.255	0.107	3.68E-18	8.36E-22	6.726333029	21.07789508	black
NDUFAF2	1.76E-22	0.30225255	0.354	0.171	3.98E-18	9.04E-22	6.360619782	21.04405664	black
PSMC3	1.85E-22	0.346295009	0.279	0.122	4.17E-18	9.46E-22	7.280510065	21.02401097	black
RAB14	1.90E-22	0.230409643	0.544	0.293	4.29E-18	9.72E-22	4.841483736	21.01250485	black
DENND5A	1.91E-22	0.294422423	0.414	0.209	4.31E-18	9.77E-22	6.18585306	21.0101289	black
MSRA	1.95E-22	0.35011904	0.5	0.284	4.40E-18	9.97E-22	7.352997785	21.00142219	black
DAGLA	1.97E-22	0.455840325	0.215	0.083	4.45E-18	1.01E-21	9.571319112	20.99708733	black
RPLP1	2.00E-22	0.2509159	0.674	0.383	4.52E-18	1.02E-21	5.26689471	20.99067739	black
UNC50	2.01E-22	0.439081217	0.212	0.082	4.53E-18	1.02E-21	9.216078147	20.98946114	black
RGS3	2.04E-22	0.648610198	0.148	0.045	4.60E-18	1.04E-21	13.61001495	20.98335024	black
RPL27	2.04E-22	0.31268198	0.44	0.226	4.60E-18	1.04E-21	6.561115505	20.98335024	black
PSMB4	2.06E-22	0.342204808	0.252	0.105	4.67E-18	1.05E-21	7.178671319	20.97770442	black
KCNIP1	2.14E-22	0.360517647	0.727	0.498	4.85E-18	1.09E-21	7.556998174	20.96152085	black
EPS15L1	2.21E-22	0.306619362	0.558	0.314	5.01E-18	1.13E-21	6.422958826	20.94766225	black
H2.T22	2.23E-22	0.674460121	0.138	0.04	5.05E-18	1.14E-21	14.12594113	20.94407169	black
CHCHD4	2.36E-22	0.455233532	0.226	0.091	5.32E-18	1.20E-21	9.524091366	20.92133089	black
PHAX	2.50E-22	0.487383013	0.184	0.065	5.64E-18	1.27E-21	10.18451887	20.89633533	black
GM7467	2.51E-22	0.705015115	0.102	0.021	5.68E-18	1.28E-21	14.73044831	20.89380496	black
SNUPN	2.58E-22	0.527227845	0.203	0.077	5.83E-18	1.31E-21	11.01009021	20.88298314	black
MRPL18	2.64E-22	0.567879432	0.154	0.048	5.98E-18	1.34E-21	11.85284199	20.87211003	black
VPS35L	2.75E-22	0.318684606	0.428	0.219	6.23E-18	1.40E-21	6.646054226	20.8546447	black
HGSNAT	2.84E-22	0.444987501	0.248	0.103	6.43E-18	1.44E-21	9.274093789	20.8412456	black
LDHA	3.07E-22	0.599598436	0.125	0.033	6.93E-18	1.55E-21	12.47673981	20.80849294	black
CLPB	3.09E-22	0.257056405	0.287	0.127	6.98E-18	1.56E-21	5.348304136	20.80595556	black
CNTFR	3.14E-22	0.357593982	0.263	0.114	7.10E-18	1.59E-21	7.437473123	20.79865294	black
POLR2F	3.21E-22	0.580134206	0.141	0.041	7.26E-18	1.63E-21	12.0604948	20.78914617	black
PCYOX1	3.29E-22	0.414301845	0.28	0.124	7.43E-18	1.66E-21	8.60897785	20.77948228	black
BRK1	3.30E-22	0.346375851	0.28	0.123	7.45E-18	1.67E-21	7.19714599	20.77842888	black
SHC3	3.31E-22	0.319837118	0.348	0.167	7.48E-18	1.67E-21	6.64524397	20.776963	black
ANKRD12	3.32E-22	0.272035675	0.898	0.663	7.50E-18	1.67E-21	5.651901406	20.77632427	black
TOMM7	3.35E-22	0.395482285	0.244	0.1	7.57E-18	1.69E-21	8.21521155	20.77264104	black
ZFP821	3.43E-22	0.393642686	0.25	0.104	7.75E-18	1.73E-21	8.173040765	20.76258762	black
TIPIN	3.57E-22	0.463970631	0.228	0.092	8.07E-18	1.80E-21	9.625140889	20.74515118	black
ZFP667	3.58E-22	0.514992748	0.143	0.042	8.10E-18	1.80E-21	10.68284478	20.74368	black
RNPS1	3.63E-22	0.190240766	0.375	0.179	8.20E-18	1.83E-21	3.945313627	20.73852896	black
X9530068E07RIK	3.73E-22	0.393158812	0.236	0.096	8.43E-18	1.87E-21	8.149027996	20.72706436	black
SERP2	3.73E-22	0.242205439	0.337	0.159	8.44E-18	1.88E-21	5.020181979	20.72695806	black
SNX30	3.80E-22	0.335290895	0.317	0.146	8.59E-18	1.91E-21	6.946986138	20.71928062	black
ZFP566	3.95E-22	0.72721334	0.108	0.024	8.92E-18	1.98E-21	15.05548086	20.70297674	black
MAP2K2	4.02E-22	0.260067711	0.51	0.272	9.08E-18	2.01E-21	5.382305558	20.6957855	black
STX17	4.03E-22	0.48098607	0.2	0.074	9.12E-18	2.02E-21	9.953592069	20.6941379	black
EIF5B	4.11E-22	0.22204815	0.528	0.285	9.29E-18	2.06E-21	4.593410096	20.68654968	black
ADSSL1	4.24E-22	0.640191474	0.127	0.034	9.58E-18	2.12E-21	13.23468688	20.67301333	black
DMD	4.26E-22	-0.495469025	0.924	0.869	9.63E-18	2.13E-21	10.2419333	20.67118787	black
RRAGA	4.45E-22	0.422239776	0.212	0.083	1.01E-17	2.23E-21	8.720274606	20.65242334	black
CHERP	4.48E-22	0.323655259	0.221	0.087	1.01E-17	2.24E-21	6.683605698	20.65038496	black
MYL6	4.49E-22	0.268551241	0.548	0.297	1.02E-17	2.24E-21	5.545275554	20.64885471	black
SLC35F3	4.60E-22	0.35075196	0.477	0.261	1.04E-17	2.30E-21	7.239218831	20.63914005	black
PIP4K2B	4.71E-22	0.294264289	0.278	0.121	1.06E-17	2.35E-21	6.070382796	20.62901625	black
WWC2	4.73E-22	0.566284759	0.225	0.092	1.07E-17	2.36E-21	11.68113453	20.62766894	black
PHKA2	4.77E-22	0.369068783	0.35	0.169	1.08E-17	2.38E-21	7.611561862	20.6236946	black
CEP68	4.88E-22	0.349956819	0.241	0.099	1.10E-17	2.43E-21	7.214083684	20.61421091	black
ZFP846	4.89E-22	0.303144892	0.361	0.177	1.11E-17	2.44E-21	6.248846239	20.61339776	black
SON	4.91E-22	0.315883444	0.884	0.62	1.11E-17	2.44E-21	6.510982741	20.61197847	black
STIP1	5.18E-22	0.300080169	0.318	0.147	1.17E-17	2.58E-21	6.178298154	20.58882523	black
STX7	5.39E-22	0.382397103	0.289	0.13	1.22E-17	2.68E-21	7.866835568	20.5724246	black
RASSF1	5.49E-22	0.498178497	0.181	0.064	1.24E-17	2.73E-21	10.24476783	20.5644521	black
LDLR	5.54E-22	0.537656582	0.212	0.084	1.25E-17	2.75E-21	11.05448793	20.56049957	black
FAAP100	5.55E-22	0.550742089	0.136	0.039	1.26E-17	2.75E-21	11.32324013	20.55996873	black
HEATR6	5.67E-22	0.32355757	0.293	0.131	1.28E-17	2.81E-21	6.649584409	20.5514722	black
ADAT1	5.70E-22	0.382763322	0.241	0.1	1.29E-17	2.82E-21	7.865587805	20.54948151	black
SNTB2	5.78E-22	0.223118853	0.419	0.213	1.31E-17	2.86E-21	4.583663464	20.54359553	black
KCNAB2	5.78E-22	0.400268242	0.277	0.124	1.31E-17	2.86E-21	8.222886532	20.54343982	black
RAB12	5.82E-22	0.259015914	0.367	0.177	1.32E-17	2.88E-21	5.320384157	20.54076165	black
NFASC	5.85E-22	0.291433183	0.683	0.405	1.32E-17	2.89E-21	5.985660281	20.53870539	black
ANAPC11	5.96E-22	0.438893879	0.23	0.095	1.35E-17	2.94E-21	9.010928919	20.53099701	black
BRINP3	6.07E-22	-0.687574846	0.762	0.764	1.37E-17	2.99E-21	14.11156572	20.52367942	black
ERGIC3	6.26E-22	0.275716942	0.353	0.17	1.41E-17	3.09E-21	5.65504122	20.51031461	black
NFKB1	6.30E-22	0.296670481	0.503	0.275	1.42E-17	3.11E-21	6.084063452	20.5078154	black
CAPN10	6.35E-22	0.319037896	0.231	0.093	1.44E-17	3.13E-21	6.541732429	20.50456238	black
DHRS7B	6.39E-22	0.427970365	0.217	0.085	1.44E-17	3.15E-21	8.774235822	20.50197057	black
GPHN	6.44E-22	-0.343968337	0.978	0.92	1.46E-17	3.17E-21	7.050873472	20.49861198	black
SPAG7	6.45E-22	0.582013238	0.158	0.051	1.46E-17	3.18E-21	11.93024875	20.49824294	black
GOLGA4	6.62E-22	0.224996912	0.538	0.288	1.50E-17	3.26E-21	4.60958642	20.48733189	black
GM19710	6.78E-22	0.595671095	0.142	0.042	1.53E-17	3.33E-21	12.19757072	20.47702302	black
KLF13	6.91E-22	0.432175565	0.228	0.092	1.56E-17	3.39E-21	8.846304369	20.4692377	black
RALA	7.01E-22	0.250099533	0.386	0.19	1.58E-17	3.44E-21	5.117857486	20.46328288	black
AIRN	7.03E-22	0.442549968	0.514	0.303	1.59E-17	3.45E-21	9.055603122	20.46232918	black
BCLAF3	7.04E-22	0.327359701	0.297	0.135	1.59E-17	3.45E-21	6.698424793	20.46197123	black
YIPF4	7.07E-22	0.308300257	0.321	0.149	1.60E-17	3.46E-21	6.30799606	20.46056052	black
ATXN7L1	7.19E-22	0.208535939	0.52	0.276	1.62E-17	3.52E-21	4.265308675	20.45359041	black
TMEM192	7.20E-22	0.529303534	0.163	0.054	1.63E-17	3.53E-21	10.8256847	20.4526968	black
NIPA2	7.36E-22	0.356287943	0.267	0.117	1.66E-17	3.60E-21	7.283849291	20.44371535	black
ATP1A1	7.59E-22	0.327842138	0.333	0.156	1.72E-17	3.71E-21	6.697925538	20.43033756	black
IFT140	7.73E-22	0.385924904	0.237	0.098	1.75E-17	3.78E-21	7.881597716	20.42262013	black
BAG1	7.77E-22	0.483083997	0.187	0.068	1.76E-17	3.79E-21	9.86509001	20.42106565	black
ZFP273	7.90E-22	0.758541033	0.121	0.032	1.78E-17	3.85E-21	15.48498782	20.41417293	black
PAK6	7.92E-22	0.612213354	0.184	0.067	1.79E-17	3.86E-21	12.49722994	20.41319397	black
RPL36AL	7.92E-22	0.38215679	0.323	0.152	1.79E-17	3.86E-21	7.801040644	20.41319388	black
LHX5	8.04E-22	0.434555014	0.202	0.077	1.82E-17	3.92E-21	8.868029653	20.40715069	black
YAE1D1	8.12E-22	0.394527553	0.22	0.088	1.84E-17	3.96E-21	8.049471525	20.4028121	black
AAMDC	8.20E-22	0.461605715	0.186	0.067	1.85E-17	3.99E-21	9.416287611	20.39898404	black
RAB34	8.27E-22	0.386749805	0.323	0.153	1.87E-17	4.02E-21	7.887887238	20.39532314	black
VPS13C	8.34E-22	0.269272775	0.541	0.297	1.88E-17	4.05E-21	5.491084176	20.39227388	black
SCD2	8.73E-22	0.284072541	0.563	0.313	1.97E-17	4.24E-21	5.787279855	20.37254231	black
SQLE	9.11E-22	0.476056673	0.192	0.072	2.06E-17	4.42E-21	9.689882533	20.35447267	black
ETNK2	9.17E-22	0.664680567	0.132	0.037	2.07E-17	4.45E-21	13.52734377	20.35164624	black
MB21D2	9.24E-22	0.672115595	0.137	0.04	2.09E-17	4.48E-21	13.6767216	20.34876396	black
ADGRA1	9.27E-22	0.253638002	0.332	0.156	2.10E-17	4.49E-21	5.16089962	20.34750151	black
STXBP4	9.50E-22	0.220075787	0.401	0.2	2.15E-17	4.60E-21	4.475707412	20.3371187	black
MEF2C	9.51E-22	0.296112616	0.262	0.115	2.15E-17	4.60E-21	6.022056741	20.33704885	black
SNRK	9.51E-22	0.394647634	0.291	0.133	2.15E-17	4.60E-21	8.025959301	20.33702625	black
PLEKHA6	9.60E-22	0.26201743	0.579	0.323	2.17E-17	4.64E-21	5.32762225	20.33308336	black
GRK5	9.68E-22	0.266677419	0.392	0.197	2.19E-17	4.68E-21	5.421535123	20.32993699	black
WDCP	9.84E-22	0.472004134	0.173	0.06	2.23E-17	4.75E-21	9.59250189	20.32291924	black
TSEN15	9.85E-22	0.355898194	0.206	0.079	2.23E-17	4.75E-21	7.232890259	20.32291924	black
PLD3	1.00E-21	0.219200607	0.485	0.255	2.26E-17	4.83E-21	4.453243741	20.31583669	black
SLC49A4	1.01E-21	0.319602409	0.253	0.108	2.29E-17	4.88E-21	6.491711803	20.31183629	black
PFDN4	1.02E-21	0.532267593	0.167	0.057	2.30E-17	4.90E-21	10.81014542	20.3096066	black
CCDC12	1.04E-21	0.241569652	0.291	0.131	2.35E-17	5.00E-21	4.904095812	20.30095988	black
X1110004F10RIK	1.06E-21	0.48084265	0.246	0.105	2.39E-17	5.10E-21	9.757630145	20.29277177	black
GRIA1	1.06E-21	0.387651026	0.883	0.729	2.39E-17	5.10E-21	7.866505453	20.29275024	black
RPS18	1.06E-21	0.278909183	0.363	0.176	2.40E-17	5.11E-21	5.65955825	20.29176013	black
PPM1E	1.07E-21	0.316934306	0.86	0.607	2.41E-17	5.12E-21	6.430791516	20.29061353	black
ADARB1	1.09E-21	0.258300415	0.543	0.293	2.45E-17	5.21E-21	5.239057317	20.2828064	black
SKP1A	1.16E-21	0.37348166	0.223	0.09	2.62E-17	5.57E-21	7.564630721	20.25435661	black
ANK2	1.17E-21	-0.302883606	0.99	0.971	2.64E-17	5.61E-21	6.133746581	20.25116729	black
DHPS	1.17E-21	0.380106995	0.219	0.088	2.65E-17	5.63E-21	7.696961805	20.24946111	black
COG6	1.18E-21	0.444805734	0.228	0.093	2.68E-17	5.68E-21	9.005534688	20.24599506	black
PFN1	1.19E-21	0.438246247	0.212	0.084	2.69E-17	5.70E-21	8.872071252	20.24448885	black
CLASRP	1.20E-21	0.269207342	0.574	0.322	2.72E-17	5.76E-21	5.448607861	20.23944752	black
C1QBP	1.21E-21	0.593914486	0.141	0.043	2.73E-17	5.77E-21	12.0201719	20.23889326	black
FBXO10	1.21E-21	0.31221844	0.363	0.18	2.73E-17	5.77E-21	6.318955692	20.23889326	black
PFDN1	1.23E-21	0.20352553	0.424	0.215	2.78E-17	5.88E-21	4.117476928	20.2307638	black
MAP3K13	1.24E-21	0.325368264	0.323	0.153	2.80E-17	5.92E-21	6.581343642	20.2273681	black
CRBN	1.27E-21	0.33318219	0.222	0.089	2.86E-17	6.04E-21	6.7366135	20.2190084	black
STAT2	1.27E-21	0.516622751	0.196	0.074	2.86E-17	6.05E-21	10.44538548	20.21859367	black
CPOX	1.27E-21	0.436712334	0.208	0.081	2.87E-17	6.06E-21	8.829214933	20.21746183	black
MRM3	1.30E-21	0.663856225	0.137	0.041	2.93E-17	6.18E-21	13.41575987	20.20883343	black
TRMT10B	1.30E-21	0.541661814	0.143	0.043	2.94E-17	6.19E-21	10.9459904	20.20816334	black
EIF2S2	1.35E-21	0.228471386	0.549	0.298	3.06E-17	6.44E-21	4.613095263	20.19112912	black
BANP	1.36E-21	0.204981237	0.378	0.185	3.08E-17	6.49E-21	4.13816402	20.18801366	black
ENPP2	1.37E-21	0.370833819	0.334	0.162	3.09E-17	6.50E-21	7.486170973	20.18740091	black
HMGXB4	1.39E-21	0.383635748	0.219	0.088	3.14E-17	6.59E-21	7.742145821	20.1809812	black
CLIP3	1.42E-21	0.308994069	0.334	0.16	3.22E-17	6.76E-21	6.232330176	20.16974049	black
DUT	1.45E-21	0.55403172	0.146	0.046	3.27E-17	6.87E-21	11.17092069	20.16296231	black
RBMXL1	1.46E-21	0.59352017	0.118	0.03	3.31E-17	6.95E-21	11.96421611	20.15806154	black
X1110002L01RIK	1.51E-21	0.582697085	0.138	0.041	3.41E-17	7.16E-21	11.73852615	20.14516024	black
SMC1A	1.52E-21	0.421156768	0.222	0.09	3.44E-17	7.21E-21	8.48291047	20.1419308	black
VPS37D	1.56E-21	0.524876981	0.186	0.068	3.54E-17	7.41E-21	10.56592202	20.1302827	black
GM49179	1.60E-21	0.736068664	0.102	0.022	3.63E-17	7.59E-21	14.80941351	20.11960872	black
SDAD1	1.62E-21	0.443460876	0.201	0.077	3.66E-17	7.66E-21	8.920579028	20.11581968	black
RAB3IP	1.62E-21	0.42847535	0.21	0.083	3.67E-17	7.67E-21	8.618757076	20.11494262	black
PI4K2A	1.63E-21	0.37199054	0.274	0.122	3.69E-17	7.71E-21	7.481797647	20.11287075	black
CAMTA1	1.69E-21	0.271357221	0.958	0.808	3.81E-17	7.97E-21	5.453886246	20.0985484	black
DVL3	1.72E-21	0.593946878	0.163	0.055	3.89E-17	8.12E-21	11.93267175	20.09046969	black
RCAN2	1.72E-21	0.321851476	0.796	0.515	3.89E-17	8.13E-21	6.466021019	20.09007729	black
RTN4	1.72E-21	0.307424327	0.84	0.573	3.90E-17	8.13E-21	6.176160986	20.09002032	black
SASH1	1.86E-21	0.304550962	0.344	0.169	4.21E-17	8.77E-21	6.108395433	20.05705516	black
NDUFA7	1.87E-21	0.33789131	0.265	0.115	4.23E-17	8.82E-21	6.776264743	20.05456943	black
NAPEPLD	1.91E-21	0.617677216	0.116	0.029	4.31E-17	8.98E-21	12.38228588	20.04653169	black
MRPS15	1.99E-21	0.305643199	0.299	0.137	4.50E-17	9.36E-21	6.121632849	20.0286899	black
GM12743	2.00E-21	0.271201533	0.221	0.088	4.52E-17	9.40E-21	5.431356989	20.02701436	black
TSEN34	2.00E-21	0.376998514	0.241	0.101	4.53E-17	9.41E-21	7.549905684	20.02635395	black
JPT1	2.01E-21	0.430341084	0.224	0.091	4.55E-17	9.46E-21	8.617190823	20.02409517	black
UBAC2	2.02E-21	0.256498433	0.481	0.257	4.56E-17	9.46E-21	5.136119306	20.02397927	black
LRPPRC	2.02E-21	0.280140405	0.467	0.246	4.57E-17	9.49E-21	5.609205339	20.02283585	black
DUS2	2.02E-21	0.303534278	0.23	0.094	4.58E-17	9.49E-21	6.077556962	20.02263799	black
TBC1D13	2.03E-21	0.426353253	0.206	0.08	4.59E-17	9.52E-21	8.536110929	20.02121684	black
LANCL1	2.07E-21	0.25110245	0.439	0.228	4.68E-17	9.69E-21	5.025440519	20.01350651	black
ZFP449	2.09E-21	0.624420453	0.133	0.039	4.72E-17	9.78E-21	12.49452074	20.00978776	black
SGSM3	2.12E-21	0.334553047	0.333	0.159	4.78E-17	9.90E-21	6.692491769	20.00427684	black
YIPF5	2.12E-21	0.180213461	0.388	0.192	4.80E-17	9.93E-21	3.604849862	20.00322197	black
UPP2	2.28E-21	-0.518187521	0.834	0.777	5.15E-17	1.06E-20	10.34976795	19.9730166	black
DAZAP2	2.28E-21	0.557614255	0.165	0.056	5.16E-17	1.07E-20	11.13686357	19.97234372	black
VAMP2	2.29E-21	0.284139738	0.506	0.274	5.18E-17	1.07E-20	5.674426456	19.97054861	black
EMC6	2.32E-21	0.558071159	0.138	0.041	5.24E-17	1.08E-20	11.14222653	19.96560178	black
NAP1L2	2.34E-21	0.543387518	0.141	0.043	5.28E-17	1.09E-20	10.84765404	19.96301661	black
A230006K03RIK	2.36E-21	-0.556934558	0.789	0.761	5.33E-17	1.10E-20	11.11576001	19.95882612	black
TMEM223	2.36E-21	0.472562769	0.2	0.077	5.34E-17	1.10E-20	9.431718948	19.95865855	black
E230016M11RIK	2.37E-21	0.267993609	0.482	0.261	5.35E-17	1.10E-20	5.348544775	19.95773256	black
MBOAT2	2.38E-21	0.215468857	0.449	0.235	5.39E-17	1.11E-20	4.299718725	19.95517487	black
FNTB	2.40E-21	0.351964266	0.243	0.103	5.42E-17	1.11E-20	7.022661677	19.95276893	black
STXBP3	2.40E-21	0.731583739	0.124	0.034	5.44E-17	1.12E-20	14.59638841	19.95176716	black
PLPP3	2.42E-21	0.692074552	0.11	0.027	5.48E-17	1.13E-20	13.80608265	19.94883732	black
POLDIP3	2.43E-21	0.444427788	0.202	0.078	5.50E-17	1.13E-20	8.865127652	19.94728476	black
PET100	2.45E-21	0.344851646	0.259	0.113	5.54E-17	1.14E-20	6.877908009	19.94454165	black
BC004004	2.46E-21	0.197414813	0.301	0.136	5.57E-17	1.14E-20	3.93693914	19.94247074	black
ZC3H15	2.51E-21	0.264786061	0.456	0.24	5.68E-17	1.16E-20	5.278190503	19.93379288	black
GM10649	2.53E-21	0.336164645	0.365	0.185	5.72E-17	1.17E-20	6.700198947	19.93130163	black
DNAJB6	2.59E-21	0.274727431	0.434	0.223	5.85E-17	1.20E-20	5.472990789	19.92153013	black
CEP57L1	2.60E-21	0.378248275	0.208	0.082	5.88E-17	1.20E-20	7.534473947	19.91938745	black
ANXA6	2.65E-21	0.380970505	0.218	0.087	5.99E-17	1.23E-20	7.585744416	19.91163176	black
WWC1	2.66E-21	0.418073343	0.259	0.115	6.01E-17	1.23E-20	8.324170108	19.91078898	black
PFDN6	2.72E-21	0.403682392	0.181	0.066	6.16E-17	1.26E-20	8.033408562	19.90031946	black
SNRPE	2.75E-21	0.443020186	0.181	0.066	6.21E-17	1.27E-20	8.814809774	19.8970838	black
WSCD2	2.76E-21	0.480604945	0.218	0.089	6.24E-17	1.27E-20	9.561649642	19.89502969	black
TRUB2	2.81E-21	0.411350268	0.212	0.085	6.35E-17	1.30E-20	8.180794379	19.88766026	black
NCAPH2	2.86E-21	0.338570197	0.267	0.118	6.47E-17	1.32E-20	6.730695381	19.87976332	black
EIF2B1	2.91E-21	0.552044107	0.129	0.036	6.57E-17	1.34E-20	10.97096938	19.87335658	black
MUS81	2.93E-21	0.573672515	0.125	0.034	6.63E-17	1.35E-20	11.3986782	19.86966066	black
NDUFB7	2.98E-21	0.461588932	0.25	0.109	6.74E-17	1.37E-20	9.168247396	19.86236403	black
SMU1	2.99E-21	0.445581931	0.182	0.066	6.76E-17	1.38E-20	8.849837229	19.86130187	black
SCCPDH	3.00E-21	0.366478914	0.211	0.083	6.79E-17	1.38E-20	7.278244467	19.85992695	black
PIGK	3.05E-21	0.278008933	0.465	0.246	6.89E-17	1.40E-20	5.519539743	19.85382156	black
ARHGEF10L	3.07E-21	0.389523002	0.251	0.109	6.93E-17	1.41E-20	7.732488119	19.85117201	black
PNMAL2	3.11E-21	0.252078492	0.377	0.186	7.03E-17	1.43E-20	5.002669079	19.84567995	black
YAF2	3.16E-21	0.270443351	0.349	0.169	7.15E-17	1.45E-20	5.365107266	19.83819254	black
GM16599	3.19E-21	0.436364326	0.234	0.098	7.21E-17	1.46E-20	8.655279158	19.83498337	black
TAF7	3.20E-21	0.633126422	0.124	0.034	7.23E-17	1.47E-20	12.55742396	19.83399133	black
METTL9	3.29E-21	0.479788625	0.2	0.077	7.44E-17	1.51E-20	9.510289541	19.82183206	black
A430033K04RIK	3.30E-21	0.383173896	0.185	0.068	7.46E-17	1.51E-20	7.594798906	19.8207628	black
TMED10	3.40E-21	0.242399375	0.484	0.26	7.68E-17	1.55E-20	4.801557305	19.8084558	black
IMPA1	3.45E-21	0.433745362	0.18	0.065	7.79E-17	1.58E-20	8.589293027	19.80261641	black
EPS15	3.45E-21	0.22139485	0.439	0.225	7.81E-17	1.58E-20	4.384039489	19.80190362	black
RBFOX3	3.47E-21	0.253938272	0.644	0.382	7.84E-17	1.58E-20	5.028070568	19.80036538	black
TBC1D9B	3.50E-21	0.26886507	0.382	0.19	7.91E-17	1.60E-20	5.322619878	19.79662095	black
CTNNBL1	3.60E-21	0.255551766	0.415	0.212	8.14E-17	1.64E-20	5.055913709	19.78430352	black
X2700054A10RIK	3.64E-21	0.396732983	0.301	0.141	8.22E-17	1.66E-20	7.847431752	19.78013449	black
GTF2A2	3.67E-21	0.325475439	0.313	0.146	8.30E-17	1.67E-20	6.436791451	19.77658123	black
ACTN1	3.92E-21	0.246023185	0.319	0.149	8.85E-17	1.78E-20	4.858637632	19.74869819	black
GRIA3	3.95E-21	-0.659242152	0.777	0.725	8.93E-17	1.80E-20	13.01683272	19.74514627	black
ANKRD13A	4.00E-21	0.300886659	0.315	0.148	9.04E-17	1.82E-20	5.939550269	19.74015824	black
SGTA	4.04E-21	0.290888168	0.27	0.12	9.13E-17	1.84E-20	5.740985101	19.73605575	black
KLF6	4.07E-21	0.630339034	0.11	0.027	9.20E-17	1.85E-20	12.43826444	19.73265778	black
CLDND1	4.13E-21	0.345151258	0.267	0.117	9.33E-17	1.88E-20	6.808729738	19.72679972	black
GUSB	4.14E-21	0.419230885	0.173	0.061	9.35E-17	1.88E-20	8.269846597	19.72623417	black
PAPSS1	4.16E-21	0.425149622	0.219	0.089	9.41E-17	1.89E-20	8.385640261	19.7239744	black
RASA3	4.16E-21	0.232477185	0.292	0.133	9.41E-17	1.89E-20	4.585374051	19.7239744	black
GM11417	4.25E-21	0.718016905	0.121	0.033	9.60E-17	1.92E-20	14.15618185	19.71566651	black
ARSK	4.27E-21	0.659285476	0.117	0.03	9.65E-17	1.93E-20	12.99671768	19.7133384	black
BRD3	4.27E-21	0.324838629	0.277	0.124	9.66E-17	1.94E-20	6.403607792	19.71319673	black
ASAP1	4.40E-21	0.308032376	0.821	0.56	9.95E-17	1.99E-20	6.06840301	19.70053632	black
NTAN1	4.50E-21	0.247869967	0.325	0.153	1.02E-16	2.03E-20	4.880985593	19.6917184	black
GLRX	4.73E-21	0.578051334	0.133	0.039	1.07E-16	2.14E-20	11.37038989	19.67020786	black
PCYT1A	4.89E-21	0.273243688	0.243	0.103	1.10E-16	2.21E-20	5.370892716	19.65605413	black
TRERF1	4.99E-21	0.346638011	0.813	0.561	1.13E-16	2.26E-20	6.810325381	19.64679338	black
ZFP809	5.04E-21	0.689445692	0.127	0.036	1.14E-16	2.27E-20	13.54291996	19.64320051	black
PTMS	5.07E-21	0.307531594	0.331	0.16	1.15E-16	2.29E-20	6.040174242	19.64082505	black
RPRD2	5.09E-21	0.239942423	0.467	0.247	1.15E-16	2.30E-20	4.712262135	19.63913706	black
ELOC	5.29E-21	0.427747239	0.221	0.09	1.20E-16	2.38E-20	8.393626976	19.62286652	black
APMAP	5.40E-21	0.464982955	0.204	0.08	1.22E-16	2.43E-20	9.120200889	19.61405422	black
ZMYM6	5.52E-21	0.278463457	0.29	0.131	1.25E-16	2.49E-20	5.459177621	19.60464645	black
CSNK2B	5.58E-21	0.512282638	0.156	0.052	1.26E-16	2.51E-20	10.0408532	19.60022154	black
CARS	5.71E-21	0.303902236	0.274	0.122	1.29E-16	2.57E-20	5.953623627	19.59058841	black
MAP1A	5.80E-21	0.269156784	0.345	0.167	1.31E-16	2.61E-20	5.27109313	19.58372753	black
DNAJC6	6.05E-21	0.300792264	0.841	0.571	1.37E-16	2.72E-20	5.885324201	19.5660757	black
TRAPPC12	6.26E-21	0.293195419	0.334	0.16	1.42E-16	2.81E-20	5.732265882	19.55100766	black
AKAP12	6.33E-21	0.505778008	0.182	0.067	1.43E-16	2.84E-20	9.886301409	19.5467206	black
DHCR7	6.67E-21	0.484875387	0.154	0.051	1.51E-16	2.99E-20	9.466702596	19.52399079	black
ZMYND8	6.74E-21	0.327889043	0.865	0.602	1.52E-16	3.02E-20	6.400325574	19.51979097	black
CNPY2	6.78E-21	0.391016363	0.216	0.087	1.53E-16	3.04E-20	7.631533021	19.5171705	black
MICU1	6.79E-21	0.219430088	0.41	0.209	1.54E-16	3.04E-20	4.282606188	19.51695059	black
FUCA2	6.87E-21	0.351309462	0.181	0.065	1.55E-16	3.07E-20	6.854956132	19.51258611	black
USP36	6.87E-21	0.267423353	0.309	0.143	1.55E-16	3.07E-20	5.218121196	19.51258611	black
CENPT	7.13E-21	0.530030597	0.154	0.051	1.61E-16	3.19E-20	10.33370754	19.49643587	black
ZKSCAN16	7.14E-21	0.252091374	0.293	0.135	1.61E-16	3.19E-20	4.914807674	19.49613583	black
A330023F24RIK	7.20E-21	-0.579951132	0.808	0.727	1.63E-16	3.22E-20	11.30475992	19.49260775	black
SORBS1	7.22E-21	0.29907476	0.794	0.517	1.63E-16	3.22E-20	5.8294763	19.49170267	black
BRI3BP	7.37E-21	0.272710304	0.285	0.129	1.67E-16	3.29E-20	5.313282369	19.48324755	black
SEC61G	7.41E-21	0.20056972	0.304	0.141	1.67E-16	3.30E-20	3.907318036	19.48109629	black
GLRX2	7.52E-21	0.308219341	0.241	0.102	1.70E-16	3.35E-20	6.00243997	19.47457273	black
RPL7L1	7.53E-21	0.675007383	0.124	0.035	1.70E-16	3.35E-20	13.14533772	19.47436138	black
CCT7	7.67E-21	0.316699583	0.299	0.14	1.73E-16	3.41E-20	6.165075148	19.46663487	black
MFAP1A	7.86E-21	0.389173513	0.235	0.099	1.78E-16	3.50E-20	7.571855867	19.45624665	black
SEZ6L	8.00E-21	0.259529443	0.503	0.276	1.81E-16	3.56E-20	5.047560897	19.44889502	black
BUD13	8.12E-21	0.709224625	0.105	0.024	1.84E-16	3.61E-20	13.78901797	19.44238466	black
REEP3	8.18E-21	0.348010917	0.297	0.139	1.85E-16	3.63E-20	6.765179938	19.43956242	black
OIP5OS1	8.20E-21	0.272967343	0.379	0.192	1.85E-16	3.64E-20	5.306111443	19.43863098	black
ARMCX3	8.21E-21	0.391826274	0.202	0.079	1.86E-16	3.65E-20	7.616432347	19.43828897	black
PHLDA3	8.52E-21	0.659118591	0.126	0.036	1.93E-16	3.78E-20	12.80177921	19.42257341	black
ZCCHC12	8.55E-21	0.313618923	0.279	0.126	1.93E-16	3.79E-20	6.090817502	19.42107782	black
ZFP771	8.76E-21	0.247611091	0.3	0.139	1.98E-16	3.88E-20	4.806389351	19.41104225	black
KIF13A	8.78E-21	0.325397373	0.413	0.216	1.98E-16	3.89E-20	6.316097473	19.41041322	black
MGAT5B	8.90E-21	0.334987447	0.356	0.179	2.01E-16	3.94E-20	6.500289013	19.4045749	black
FAM216A	8.92E-21	0.424704846	0.192	0.073	2.02E-16	3.95E-20	8.240805874	19.40360687	black
RPL21	8.97E-21	0.194519671	0.509	0.273	2.03E-16	3.97E-20	3.774021272	19.40174608	black
RTRAF	8.98E-21	0.449926831	0.165	0.058	2.03E-16	3.97E-20	8.729132483	19.40122678	black
POLR2E	9.46E-21	0.494531295	0.172	0.061	2.14E-16	4.18E-20	9.583443224	19.37884077	black
RBM8A	9.58E-21	0.482822935	0.184	0.068	2.16E-16	4.23E-20	9.354137941	19.37384756	black
ERP44	9.59E-21	0.22193821	0.363	0.179	2.17E-16	4.23E-20	4.29975902	19.37367621	black
MAGEE1	9.64E-21	0.397668891	0.201	0.078	2.18E-16	4.25E-20	7.703395965	19.3713819	black
MRPL23	9.66E-21	0.387343172	0.197	0.076	2.18E-16	4.26E-20	7.503227428	19.37100735	black
B4GALT5	9.73E-21	0.335271239	0.329	0.16	2.20E-16	4.29E-20	6.493467644	19.36780398	black
DNAJC2	1.07E-20	0.509160704	0.194	0.075	2.43E-16	4.73E-20	9.839750313	19.32543151	black
ZFP943	1.15E-20	0.40289989	0.195	0.074	2.61E-16	5.08E-20	7.773546568	19.29399028	black
FBXO25	1.16E-20	0.441533751	0.208	0.083	2.62E-16	5.11E-20	8.518059808	19.29197888	black
MACO1	1.19E-20	0.280161125	0.659	0.394	2.68E-16	5.21E-20	5.40236562	19.28306652	black
JAKMIP1	1.21E-20	0.208562081	0.426	0.219	2.73E-16	5.32E-20	4.019923179	19.27446807	black
TMEM126A	1.26E-20	0.188119411	0.437	0.224	2.84E-16	5.52E-20	3.622781188	19.25788074	black
ELMSAN1	1.28E-20	0.45419475	0.184	0.068	2.90E-16	5.64E-20	8.742738872	19.24887698	black
TUBG1	1.29E-20	0.565903104	0.119	0.032	2.91E-16	5.66E-20	10.89214859	19.24737383	black
RAB30	1.31E-20	0.241673355	0.548	0.307	2.96E-16	5.73E-20	4.650191827	19.24164051	black
STK24	1.33E-20	0.410183787	0.206	0.082	3.01E-16	5.83E-20	7.889565356	19.23422039	black
APOPT1	1.34E-20	0.365044225	0.202	0.08	3.04E-16	5.89E-20	7.019773397	19.22992592	black
ATP2B2	1.35E-20	0.318412432	0.831	0.572	3.04E-16	5.90E-20	6.122863289	19.22934748	black
SRPRB	1.40E-20	0.38454349	0.183	0.067	3.16E-16	6.12E-20	7.388372819	19.2133608	black
DISP2	1.41E-20	0.240639336	0.571	0.319	3.19E-16	6.18E-20	4.622425891	19.20893715	black
PSMC6	1.41E-20	0.336406935	0.291	0.134	3.20E-16	6.18E-20	6.462001896	19.20888434	black
CACNG7	1.49E-20	0.276813595	0.345	0.168	3.37E-16	6.52E-20	5.310836349	19.18560518	black
SNX15	1.53E-20	0.34149175	0.19	0.072	3.46E-16	6.69E-20	6.547934771	19.17450357	black
DEXI	1.54E-20	0.183803915	0.321	0.152	3.47E-16	6.71E-20	3.5241341	19.17333538	black
TBCA	1.54E-20	0.334994357	0.32	0.155	3.48E-16	6.72E-20	6.422739749	19.17268041	black
GDPD1	1.59E-20	0.255515632	0.494	0.272	3.59E-16	6.93E-20	4.895521774	19.15938269	black
MYO1D	1.64E-20	0.401926694	0.178	0.066	3.70E-16	7.14E-20	7.695507643	19.14654527	black
PSMA2	1.65E-20	0.314861292	0.326	0.158	3.73E-16	7.18E-20	6.027674787	19.1439054	black
7-Sep	1.67E-20	0.22475495	0.568	0.322	3.76E-16	7.25E-20	4.30172286	19.13961341	black
ZMAT5	1.68E-20	0.433315546	0.161	0.055	3.80E-16	7.31E-20	8.291874002	19.13587935	black
MCF2L	1.74E-20	0.267055311	0.535	0.299	3.94E-16	7.58E-20	5.106146792	19.12018442	black
TMEM205	1.78E-20	0.312162641	0.219	0.09	4.01E-16	7.72E-20	5.966183618	19.11242035	black
BCAS3OS1	1.79E-20	0.558334664	0.111	0.028	4.04E-16	7.76E-20	10.66970079	19.10986634	black
ILDR2	1.79E-20	0.447573318	0.233	0.099	4.05E-16	7.78E-20	8.552704461	19.10905795	black
PDXDC1	1.87E-20	0.112051621	0.421	0.213	4.24E-16	8.13E-20	2.139038044	19.08975554	black
COPS4	1.90E-20	0.333933585	0.252	0.11	4.30E-16	8.25E-20	6.372716308	19.08378373	black
USP10	1.94E-20	0.27067805	0.241	0.103	4.38E-16	8.41E-20	5.163283848	19.0753696	black
SAP130	1.98E-20	0.179041232	0.44	0.226	4.48E-16	8.58E-20	3.413688908	19.06649582	black
PHYH	2.01E-20	0.342619278	0.223	0.092	4.54E-16	8.70E-20	6.530407282	19.06024473	black
VBP1	2.03E-20	0.238768371	0.23	0.096	4.60E-16	8.80E-20	4.549825352	19.05539383	black
SLC35D1	2.15E-20	0.389823275	0.22	0.092	4.86E-16	9.30E-20	7.41893437	19.03153263	black
CHD3	2.20E-20	0.189131175	0.409	0.209	4.97E-16	9.51E-20	3.597608312	19.02176259	black
X2210408F21RIK	2.28E-20	0.293930976	0.59	0.345	5.15E-16	9.86E-20	5.586527941	19.00625794	black
GOLGA7B	2.30E-20	0.387630873	0.178	0.066	5.19E-16	9.93E-20	7.366232939	19.00321529	black
TTC1	2.34E-20	0.526031695	0.195	0.077	5.28E-16	1.01E-19	9.992444712	18.99589856	black
NSRP1	2.35E-20	0.376744039	0.209	0.085	5.32E-16	1.01E-19	7.155727985	18.99360641	black
HNRNPL	2.45E-20	0.219751615	0.482	0.26	5.54E-16	1.06E-19	4.169904512	18.97553524	black
TTC7B	2.46E-20	0.269752087	0.573	0.324	5.55E-16	1.06E-19	5.11863003	18.97531207	black
FERMT2	2.60E-20	0.302212844	0.289	0.134	5.87E-16	1.12E-19	5.727195524	18.95086738	black
DBN1	2.71E-20	0.210389573	0.349	0.169	6.12E-16	1.17E-19	3.983371567	18.93331262	black
KCNK2	2.78E-20	0.375487941	0.328	0.163	6.29E-16	1.20E-19	7.104874024	18.92171023	black
HEATR5A	2.79E-20	0.370441075	0.234	0.1	6.31E-16	1.20E-19	7.008988889	18.92065802	black
RAB4A	2.81E-20	0.492757294	0.154	0.052	6.35E-16	1.21E-19	9.321933383	18.91790034	black
RAP1A	2.82E-20	0.318742532	0.371	0.188	6.37E-16	1.21E-19	6.029515578	18.91657048	black
TARDBP	2.92E-20	-1.133635951	0.37	0.432	6.59E-16	1.25E-19	21.42809938	18.90209935	blue
NDUFV3	2.94E-20	0.2960179	0.31	0.148	6.64E-16	1.26E-19	5.594494696	18.89917701	black
PRELID1	3.08E-20	0.531812614	0.144	0.047	6.95E-16	1.32E-19	10.0403213	18.87943427	black
GTF2IRD1	3.09E-20	0.230805233	0.462	0.248	7.00E-16	1.33E-19	4.356895045	18.87693353	black
PRXL2C	3.12E-20	0.241780082	0.271	0.123	7.05E-16	1.34E-19	4.563372003	18.87406091	black
ZFP169	3.21E-20	0.324056488	0.285	0.133	7.25E-16	1.37E-19	6.112283133	18.86178294	black
LRRC7	3.38E-20	-0.376024302	0.954	0.895	7.64E-16	1.45E-19	7.084009883	18.83923419	black
LY6E	3.41E-20	0.344417851	0.265	0.118	7.70E-16	1.46E-19	6.48747841	18.83606898	black
GGT7	3.52E-20	0.21485845	0.519	0.284	7.95E-16	1.51E-19	4.044151	18.82239679	black
X2700069I18RIK	3.54E-20	0.512705171	0.257	0.118	8.00E-16	1.51E-19	9.648996016	18.81977512	black
STAMBP	3.55E-20	0.663138995	0.111	0.029	8.03E-16	1.52E-19	12.47939309	18.81866878	black
KSR2	3.64E-20	0.291154391	0.781	0.501	8.24E-16	1.56E-19	5.475969965	18.80778765	black
GSG1L	3.65E-20	0.456817894	0.217	0.091	8.25E-16	1.56E-19	8.591537533	18.80735769	black
FNDC5	3.65E-20	0.275180454	0.418	0.221	8.26E-16	1.56E-19	5.175362062	18.80715721	black
PRKCSH	3.71E-20	0.328981481	0.268	0.121	8.38E-16	1.58E-19	6.185201692	18.80106341	black
B3GALNT1	3.79E-20	0.398835917	0.217	0.089	8.57E-16	1.62E-19	7.494778041	18.79163266	black
OTX2	3.86E-20	0.443476317	0.251	0.113	8.72E-16	1.64E-19	8.330270381	18.78402536	black
CFAP54	4.03E-20	0.520392249	0.168	0.061	9.12E-16	1.72E-19	9.7651352	18.76495128	black
TACC1	4.06E-20	0.270498741	0.525	0.29	9.18E-16	1.73E-19	5.075091393	18.76197784	black
PIN1	4.11E-20	0.466644962	0.161	0.056	9.30E-16	1.75E-19	8.752833036	18.75694319	black
SSB	4.12E-20	0.219661594	0.498	0.267	9.30E-16	1.75E-19	4.120147245	18.75679393	black
NFS1	4.15E-20	0.325686954	0.228	0.097	9.37E-16	1.76E-19	6.107891839	18.75387318	black
MTERF2	4.20E-20	0.420123263	0.181	0.068	9.49E-16	1.78E-19	7.876696549	18.74853703	black
KLHDC2	4.22E-20	0.219277065	0.296	0.137	9.55E-16	1.79E-19	4.110628114	18.74627482	black
SRP19	4.23E-20	0.571405135	0.166	0.06	9.57E-16	1.80E-19	10.71118629	18.7453448	black
VPS72	4.34E-20	0.510317617	0.157	0.054	9.81E-16	1.84E-19	9.560852702	18.73510219	black
PREP	4.34E-20	0.479311453	0.148	0.049	9.82E-16	1.84E-19	8.979735296	18.73465622	black
MYO18A	4.35E-20	0.237335411	0.514	0.28	9.84E-16	1.84E-19	4.446280351	18.73416333	black
[truncated: 6,473 more rows]
