# Supplementary material for: Single-Cell Analyses Reveal Necroptosis's Potential Role in Neuron Degeneration and Show Enhanced Neuron-Immune Cell Interaction in Parkinson's Disease Progression
Source: Parkinsons Dis. 2023 Dec 19;2023:5057778. doi: 10.1155/2023/5057778 (PMC10751163; doi:10.1155/2023/5057778)
Supplement: Supplementary Materials — Figure S1: DA and GABA subclusters distribution. A: Heatmap showing DEGs expression of DA and GABA in single cells. B: KEGG enrichment of DEGs. C: PCA of two DA subclusters between PD and control samples. D: PCA of two GABA subclusters between PD and normal samples. Table S1: Detailed information of the patient samples and control samples were listed. Dataset column shows the sources of the samples. The sample name column shows the name of each sample appeared in the dataset. The brain position where samples came from includes Midbrain and substantia nigra. The patients and control samples' gender and ages were also provided. Table S2: Differential expression genes between Control and Parkinson's disease patients in cell subtypes (GABA, DA and GLU respectively) with statistical test. [file 5057778.f1.zip › Table S2-GLU DEGs (1).txt]

	p_val	avg_log2FC	pct.1	pct.2	p_val_adj	BH	PFC	log_padj	color
PTGDS	0	2.896482595	0.906	0.146	0	0	717.1811354	299.9972367	red
SNHG11	0	1.055627579	1	0.999	0	0	717.1811354	299.9972367	red
SNHG14	0	-0.802611126	0.99	0.991	0	0	717.1811354	299.9972367	black
UBB	0	1.805203008	0.911	0.314	0	0	717.1811354	299.9972367	red
RTN1	0	1.142158976	0.998	0.935	0	0	717.1811354	299.9972367	red
HSP90AA1	0	1.56949857	0.91	0.377	0	0	717.1811354	299.9972367	red
MALAT1	0	1.825602105	1	1	0	0	717.1811354	299.9972367	red
PLP1	0	2.422163028	0.857	0.229	0	0	717.1811354	299.9972367	red
AC149090.1	0	-1.681482049	0.665	0.893	0	0	717.1811354	299.9972367	blue
MEG3	1.14E-303	0.473113544	1	1	2.58E-299	1.01E-300	141.9327558	299.9972367	black
FTH1	2.53E-301	1.543495589	0.922	0.425	5.73E-297	2.03E-298	459.4869702	297.6924413	red
FGF14	1.18E-296	-0.642308283	0.998	0.999	2.67E-292	8.69E-294	188.2355931	293.061133	black
SLC25A4	6.43E-283	1.557537908	0.843	0.291	1.45E-278	4.36E-280	435.1143261	279.3603442	red
HSP90AB1	5.75E-276	1.568542096	0.821	0.279	1.30E-271	3.62E-273	427.3359082	272.4414661	red
SCG5	5.44E-273	1.13397928	0.975	0.665	1.23E-268	3.20E-270	305.6020121	269.4952346	red
CCSER1	2.48E-267	-0.837046335	0.995	0.994	5.61E-263	1.37E-264	220.8665853	263.8642284	black
NRXN1	5.75E-260	-0.582960758	1	1	1.30E-255	2.98E-257	149.5444859	256.5258191	black
CDR1OS	7.15E-255	-1.058386341	0.924	0.946	1.62E-250	3.50E-252	266.1374942	251.455904	blue
APOD	1.66E-254	2.856005244	0.479	0.043	3.75E-250	7.70E-252	717.1811354	251.1133819	red
PPIA	2.40E-251	1.476741062	0.826	0.29	5.43E-247	1.06E-248	366.1954146	247.9753723	red
ITM2B	3.24E-247	1.265409006	0.919	0.484	7.32E-243	1.36E-244	308.5910678	243.86666	red
PRELID3A	9.11E-243	1.651548058	0.66	0.15	2.06E-238	3.65E-240	395.4430396	239.4378036	red
STMN1	2.41E-232	1.531934578	0.723	0.206	5.44E-228	9.22E-230	350.8667273	229.0350596	red
TUBA1A	2.10E-229	1.537575409	0.702	0.195	4.75E-225	7.72E-227	347.6648001	226.1123573	red
APLP1	6.04E-216	1.164663859	0.928	0.534	1.36E-211	2.13E-213	247.6911779	212.671816	red
CALM1	3.92E-212	1.099830193	0.934	0.543	8.85E-208	1.33E-209	229.729086	208.876868	red
CD81	2.03E-208	1.366635959	0.772	0.28	4.59E-204	6.63E-206	280.4044097	205.1785685	red
CAR2	7.17E-203	2.373640396	0.422	0.046	1.62E-198	2.26E-200	473.8884934	199.6462877	red
NRG3	1.93E-196	-0.480147875	1	1	4.37E-192	5.88E-194	92.77931227	193.2307048	black
COX5A	2.27E-192	1.485291046	0.603	0.155	5.12E-188	6.66E-190	280.9819088	189.1763298	red
IL1RAPL1	2.58E-192	-0.739361696	0.988	0.971	5.84E-188	7.35E-190	139.8383082	189.1338285	black
CNTNAP2	5.20E-190	-0.737832482	0.999	0.999	1.18E-185	1.43E-187	137.8595017	186.8439044	black
RNF121	2.54E-189	1.544032639	0.63	0.185	5.73E-185	6.78E-187	287.4511343	186.169079	red
MDH1	2.25E-180	1.133123431	0.78	0.312	5.08E-176	5.83E-178	200.8286255	177.2345536	red
CADM2	2.94E-180	-0.693459646	0.996	0.993	6.65E-176	7.41E-178	122.8326676	177.1302315	black
CALM2	1.98E-179	0.990008893	0.928	0.541	4.48E-175	4.85E-177	174.5524079	176.3139797	black
SCG2	8.31E-178	1.479116982	0.793	0.374	1.88E-173	1.98E-175	258.4067057	174.7033594	red
TRIM35	2.25E-174	1.259254327	0.663	0.209	5.09E-170	5.22E-172	215.6875911	171.2819931	red
CNP	3.69E-174	2.048434977	0.38	0.043	8.33E-170	8.33E-172	350.4448242	171.0793011	red
NDUFA4	1.17E-171	1.224077051	0.702	0.247	2.65E-167	2.59E-169	206.363724	168.5872011	red
APOE	1.30E-168	1.472950106	0.567	0.151	2.93E-164	2.79E-166	243.8533441	165.5543818	red
X6030458C11RIK	1.86E-168	1.530082907	0.471	0.092	4.21E-164	3.91E-166	253.0877676	165.4078785	red
LINGO2	1.24E-163	-0.69060125	0.971	0.975	2.81E-159	2.55E-161	110.9064447	160.59404	black
CHCHD2	1.22E-159	1.272174883	0.636	0.209	2.75E-155	2.44E-157	199.2384803	156.6124933	red
HSPA8	1.65E-159	1.056458932	0.802	0.348	3.72E-155	3.23E-157	165.3266202	156.4912892	red
TRF	2.16E-159	2.269701725	0.409	0.071	4.89E-155	4.14E-157	354.9419022	156.3826199	red
EIF2S3Y	1.75E-156	0.9848108	0.833	0.421	3.95E-152	3.28E-154	151.1531538	153.48446	black
NDFIP1	5.87E-156	0.780716355	0.955	0.67	1.33E-151	1.08E-153	119.4238291	152.9669878	black
BSG	6.60E-156	0.970948945	0.866	0.449	1.49E-151	1.19E-153	148.4826363	152.9252769	black
COX4I1	5.75E-155	0.974761865	0.831	0.389	1.30E-150	1.01E-152	148.1580581	151.9941058	black
PSMA1	2.32E-153	1.07605769	0.708	0.275	5.24E-149	4.01E-151	161.836056	150.3971929	red
KCNA1	2.86E-152	1.524540078	0.514	0.141	6.47E-148	4.85E-150	227.6354928	149.3142071	red
GM48677	3.11E-152	2.171541834	0.265	0.006	7.03E-148	5.17E-150	324.1812166	149.2861945	red
ATP5A1	6.16E-152	1.095454541	0.676	0.239	1.39E-147	1.01E-149	163.2200398	148.9975473	red
LUC7L2	5.87E-151	-0.73242938	0.957	0.938	1.33E-146	9.40E-149	108.4190648	148.0266463	black
MAL	4.46E-149	2.384875093	0.307	0.027	1.01E-144	7.02E-147	348.5578363	146.1534977	red
EIF1	5.99E-149	1.102563378	0.679	0.248	1.35E-144	9.27E-147	161.0107086	146.0330642	red
HAGH	1.06E-147	1.229789927	0.55	0.156	2.39E-143	1.60E-145	178.0669237	144.7945862	red
ACP1	1.34E-147	1.116925702	0.693	0.264	3.03E-143	2.00E-145	161.6167967	144.6978939	red
CLDN11	1.63E-147	2.451247989	0.321	0.036	3.69E-143	2.40E-145	354.4987659	144.6197069	red
X9530059O14RIK	6.91E-147	1.101142794	0.802	0.425	1.56E-142	9.98E-145	158.5653866	144.0007486	red
ATP1B1	3.06E-145	0.712875947	0.972	0.773	6.91E-141	4.35E-143	101.4863333	142.3618425	black
PTMA	1.49E-142	1.188178673	0.589	0.188	3.38E-138	2.09E-140	165.9642778	139.679563	red
UBC	5.82E-142	1.146474954	0.563	0.168	1.31E-137	8.01E-140	159.4702498	139.096148	red
COX6A1	8.33E-142	1.133853278	0.601	0.196	1.88E-137	1.13E-139	157.5452586	138.9467771	red
UNC80	2.54E-140	-0.707248356	0.956	0.943	5.73E-136	3.39E-138	97.22554502	137.4701605	black
CST3	3.63E-140	0.956013278	0.806	0.379	8.20E-136	4.77E-138	131.2807327	137.3210349	black
ZFP933	2.60E-138	1.952722147	0.276	0.02	5.88E-134	3.37E-136	264.5398308	135.472336	red
NOVA1	2.87E-138	-1.418045549	0.543	0.691	6.49E-134	3.67E-136	192.0533984	135.4352816	blue
GLUL	3.48E-138	1.448739737	0.434	0.098	7.88E-134	4.39E-136	196.0980598	135.357687	red
TSPAN3	4.25E-138	0.948460379	0.774	0.338	9.61E-134	5.28E-136	128.305186	135.2773282	black
RPL6	7.96E-138	1.033941078	0.706	0.284	1.80E-133	9.74E-136	139.5936827	135.0112551	red
MDGA2	3.35E-137	-0.533238104	0.999	0.998	7.56E-133	4.04E-135	71.66367191	134.3933815	black
CAMK1	5.29E-136	1.298726328	0.466	0.116	1.20E-131	6.30E-134	172.9909564	133.2004694	red
GM15478	2.97E-135	1.513604707	0.398	0.08	6.71E-131	3.49E-133	200.4874748	132.4569578	red
LDHB	5.38E-135	1.071488582	0.65	0.243	1.22E-130	6.25E-133	141.6555108	132.2044054	red
ATP5J	6.27E-135	1.125693533	0.579	0.189	1.42E-130	7.17E-133	148.7538931	132.1442193	red
TMSB4X	4.11E-134	1.034711884	0.669	0.252	9.30E-130	4.65E-132	135.8914883	131.3326833	red
SNHG9	4.34E-134	-2.202764599	0.166	0.432	9.80E-130	4.84E-132	289.2564944	131.3152093	blue
SPARCL1	5.80E-134	1.198022104	0.677	0.29	1.31E-129	6.39E-132	157.1737267	131.1943462	red
PEBP1	1.32E-132	1.168656589	0.539	0.163	2.98E-128	1.44E-130	151.7418623	129.8429871	red
EEF1A1	5.16E-132	0.95410378	0.771	0.35	1.17E-127	5.55E-130	123.3235882	129.2559475	black
ZRSR1	3.29E-131	1.83824485	0.276	0.023	7.43E-127	3.49E-129	236.1347969	128.4566617	red
RPS13	7.08E-130	0.982120337	0.642	0.23	1.60E-125	7.43E-128	124.8561975	127.1292252	black
RPS23	1.14E-129	1.065086256	0.626	0.226	2.57E-125	1.18E-127	135.1895106	126.9282276	red
ATP6V0C	2.97E-129	0.66199543	0.979	0.753	6.71E-125	3.05E-127	83.75328161	126.5164046	black
4-Sep	1.57E-128	1.148474535	0.605	0.223	3.56E-124	1.60E-126	144.4747853	125.7971169	red
BTAF1	2.27E-128	0.940353977	0.762	0.351	5.13E-124	2.27E-126	118.1490622	125.6431781	black
CHCHD10	3.18E-126	1.17179386	0.502	0.148	7.20E-122	3.15E-124	144.7177344	123.5010178	red
CRYAB	3.86E-126	1.847523015	0.267	0.023	8.73E-122	3.78E-124	228.0252056	123.4221191	red
MBP	1.30E-123	1.535926458	0.585	0.225	2.95E-119	1.26E-121	185.6915842	120.8987469	red
CTSL	1.09E-121	1.291044613	0.422	0.104	2.46E-117	1.04E-119	153.6096714	118.9809165	red
SNRNP70	3.83E-121	0.610675258	0.967	0.749	8.66E-117	3.63E-119	72.32819786	118.4397057	black
ADGRB3	5.02E-121	-0.481934658	0.998	0.994	1.14E-116	4.71E-119	57.02574162	118.326708	black
NLGN1	1.80E-119	-0.539510565	0.997	0.995	4.07E-115	1.67E-117	63.00226077	116.7766952	black
PTN	8.17E-119	1.079044629	0.662	0.283	1.85E-114	7.50E-117	125.3039141	116.124867	red
DBNDD2	1.04E-118	1.160975437	0.451	0.123	2.35E-114	9.45E-117	134.7018526	116.0247222	red
X5430405H02RIK	1.83E-118	1.520471536	0.316	0.051	4.14E-114	1.65E-116	176.0452552	115.7833284	red
MOG	7.10E-118	2.295182979	0.262	0.028	1.61E-113	6.33E-116	264.4022508	115.1987677	red
PCYT2	1.87E-117	0.907537434	0.711	0.308	4.23E-113	1.65E-115	104.1698322	114.7829592	black
GNG3	3.37E-117	0.987096681	0.542	0.181	7.62E-113	2.94E-115	113.0534102	114.5312434	black
ATPIF1	1.74E-116	0.871970795	0.743	0.343	3.93E-112	1.50E-114	99.25086919	113.8236162	black
PSMD7	2.09E-115	1.000750129	0.542	0.184	4.72E-111	1.79E-113	112.832656	112.7480804	red
GAPDH	1.68E-114	0.930356828	0.72	0.32	3.79E-110	1.42E-112	104.0576429	111.8470244	black
GM27241	3.13E-114	1.663039242	0.258	0.027	7.08E-110	2.63E-112	185.5620879	111.5801018	red
LRRC4C	6.94E-114	-0.694403096	0.992	0.984	1.57E-109	5.77E-112	77.24438845	111.2385428	black
NAP1L5	1.40E-113	0.79672992	0.858	0.48	3.17E-109	1.15E-111	88.38719284	110.937459	black
RAPGEF4OS1	4.77E-113	1.241027652	0.39	0.094	1.08E-108	3.89E-111	137.0212525	110.409508	red
VTI1B	5.65E-113	0.920470396	0.586	0.214	1.28E-108	4.57E-111	101.5648683	110.340179	black
NRG3OS	7.19E-113	0.950626843	0.583	0.213	1.63E-108	5.76E-111	104.7965206	110.2393871	black
ISCU	8.83E-113	1.167943746	0.432	0.12	2.00E-108	7.02E-111	128.653586	110.1539234	red
YPEL2	2.46E-112	1.114918441	0.514	0.177	5.56E-108	1.94E-110	122.3213892	109.713307	red
NME2	4.71E-112	1.170789995	0.376	0.086	1.06E-107	3.67E-110	128.1252925	109.4349055	red
CTNNA2	5.23E-112	-0.552162547	0.995	0.991	1.18E-107	4.05E-110	60.40262055	109.3928243	black
RAB3A	9.92E-111	0.943549713	0.599	0.225	2.24E-106	7.61E-109	102.0153971	108.1187305	black
AW209491	6.77E-110	1.481671231	0.278	0.039	1.53E-105	5.15E-108	158.9660327	107.2883305	red
RNPC3	2.31E-109	0.830159151	0.731	0.34	5.22E-105	1.74E-107	88.62761157	106.7597838	black
MOBP	2.35E-109	1.627295482	0.331	0.069	5.32E-105	1.76E-107	173.7213667	106.7546543	red
MFAP3	5.63E-109	1.075111893	0.394	0.098	1.27E-104	4.17E-107	114.370423	106.3800184	red
COX8A	2.79E-108	0.794574235	0.748	0.348	6.30E-104	2.05E-106	83.97739138	105.6885408	black
SLC25A27	2.64E-107	0.863399046	0.66	0.275	5.97E-103	1.92E-105	90.41134208	104.7155918	black
ACOT7	9.37E-107	0.830164253	0.583	0.218	2.12E-102	6.77E-105	86.47775613	104.169453	black
NACA	9.75E-107	1.066296793	0.441	0.129	2.20E-102	6.99E-105	111.0609948	104.1557994	red
JKAMP	2.57E-106	0.987225778	0.529	0.185	5.81E-102	1.83E-104	102.4130346	103.7382096	black
LRPAP1	1.14E-105	0.905719554	0.607	0.24	2.57E-101	8.01E-104	93.37626834	103.0962265	black
GM20642	1.33E-105	0.871067841	0.662	0.282	3.00E-101	9.28E-104	89.74824928	103.0324448	black
BABAM1	1.96E-105	1.063976752	0.414	0.113	4.44E-101	1.36E-103	109.4466578	102.8656477	red
RAB5B	2.86E-105	0.96697093	0.504	0.171	6.47E-101	1.97E-103	99.3128717	102.7051265	black
COX7B	5.87E-105	0.811794888	0.743	0.362	1.33E-100	4.01E-103	83.12501961	102.3965793	black
ATP6V1E1	6.07E-105	1.016369379	0.471	0.148	1.37E-100	4.11E-103	104.0617164	102.3857257	red
PRKCA	1.72E-104	0.889757308	0.689	0.328	3.88E-100	1.15E-102	90.69966554	101.9375336	black
PCP4	1.80E-104	0.818631778	0.646	0.268	4.08E-100	1.20E-102	83.43433446	101.9192471	black
X6430590A07RIK	4.73E-104	1.6825934	0.218	0.017	1.07E-99	3.14E-102	170.7887823	101.5032998	red
MAG	6.38E-104	1.941264422	0.297	0.058	1.44E-99	4.20E-102	196.7991108	101.3767669	red
MT1	9.71E-104	1.058854693	0.41	0.112	2.20E-99	6.34E-102	107.1537196	101.1977567	red
KCND2	1.02E-103	-0.705533105	0.936	0.968	2.30E-99	6.59E-102	71.38679155	101.1813493	black
FKBP3	1.03E-103	1.068808677	0.446	0.135	2.33E-99	6.63E-102	108.1407466	101.1787693	red
CLTA	1.14E-103	0.934150765	0.514	0.177	2.57E-99	7.28E-102	94.47813206	101.1379914	black
SNX21	5.00E-103	1.110235464	0.404	0.111	1.13E-98	3.17E-101	111.5772132	100.4986932	red
RBM39	7.26E-103	0.475892951	0.992	0.859	1.64E-98	4.57E-101	47.75104966	100.339897	black
PPT1	1.49E-102	0.818388283	0.669	0.287	3.36E-98	9.30E-101	81.86466167	100.0315662	black
HINT1	1.52E-102	0.839509921	0.568	0.21	3.43E-98	9.42E-101	83.97292421	100.0261249	black
OSBPL9	1.55E-102	0.64600414	0.929	0.635	3.50E-98	9.56E-101	64.61302053	100.0195147	black
PNN	3.03E-102	0.774693706	0.757	0.372	6.86E-98	1.86E-100	77.26099972	99.73102807	black
SEC11C	9.41E-102	1.048022278	0.461	0.148	2.13E-97	5.72E-100	104.0081223	99.24228186	red
ATP5F1	1.27E-101	0.889167354	0.578	0.223	2.88E-97	7.69E-100	88.12920481	99.11430559	black
ARGLU1	2.88E-101	-1.049850304	0.669	0.716	6.50E-97	1.73E-99	103.6863454	98.76298084	blue
NDUFA6	7.93E-101	1.023273165	0.437	0.132	1.79E-96	4.72E-99	100.6141597	98.32580703	red
PRICKLE1	1.38E-100	0.699031556	0.917	0.631	3.11E-96	8.14E-99	68.5676719	98.08952309	black
COX7C	1.20E-99	0.842434902	0.601	0.241	2.71E-95	7.04E-98	81.84444344	97.1522467	black
ACTL6A	1.38E-99	1.281444271	0.296	0.056	3.12E-95	8.06E-98	124.4202275	97.09374824	red
MAPK8IP1	1.43E-98	0.941926446	0.484	0.162	3.23E-94	8.30E-97	90.50110273	96.08085969	black
NDUFB8	6.99E-98	0.886428141	0.483	0.16	1.58E-93	4.03E-96	84.56058846	95.39474729	black
AHSA1	1.05E-97	1.190518499	0.335	0.078	2.37E-93	6.01E-96	113.3625642	95.22116982	red
TXNDC15	1.22E-97	0.878682631	0.568	0.219	2.76E-93	6.94E-96	83.61433902	95.15874798	black
LZTR1	1.74E-97	0.917539333	0.469	0.155	3.92E-93	9.81E-96	87.17377468	95.00821554	black
TPT1	2.27E-97	0.926486257	0.51	0.181	5.13E-93	1.28E-95	87.91840669	94.89445308	black
PPP1R1A	3.64E-97	1.178499892	0.319	0.07	8.22E-93	2.03E-95	111.5953623	94.69272177	red
LSAMP	5.36E-97	-0.483838396	0.999	0.998	1.21E-92	2.97E-95	45.73588348	94.52718903	black
RPS5	6.40E-97	0.902371391	0.461	0.148	1.45E-92	3.52E-95	85.23161698	94.4529246	black
X3110021N24RIK	3.07E-96	0.898883738	0.471	0.157	6.95E-92	1.68E-94	84.29181327	93.77387717	black
CHGB	3.15E-96	0.850372877	0.648	0.286	7.13E-92	1.72E-94	79.7355956	93.76545011	black
ZBTB16	3.31E-96	1.422555751	0.297	0.062	7.48E-92	1.79E-94	133.3604098	93.74705329	red
GM2516	6.19E-96	1.446123644	0.324	0.078	1.40E-91	3.33E-94	135.1805222	93.47784526	red
VMP1	6.56E-96	0.837330545	0.743	0.383	1.48E-91	3.50E-94	78.25299785	93.4553246	black
RPL13	8.18E-96	0.690125499	0.758	0.371	1.85E-91	4.32E-94	64.43304375	93.36424151	black
GM42418	8.19E-96	0.774235224	0.669	0.3	1.85E-91	4.32E-94	72.28588448	93.36424151	black
ALDOA	1.03E-95	0.81869607	0.671	0.302	2.32E-91	5.40E-94	76.3580741	93.2679133	black
CEP19	1.73E-95	1.192457478	0.313	0.068	3.92E-91	9.04E-94	110.9505706	93.0436285	red
ATP5J2	6.06E-95	0.837793349	0.546	0.207	1.37E-90	3.14E-93	77.49792523	92.50243548	black
LAMP1	6.34E-95	0.866894666	0.543	0.207	1.43E-90	3.27E-93	80.17542982	92.48578052	black
RPL7	1.01E-94	0.986595835	0.426	0.131	2.29E-90	5.19E-93	91.04778273	92.28478321	black
MRI1	1.41E-94	1.249096546	0.305	0.065	3.18E-90	7.17E-93	115.0975928	92.14467301	red
CKB	3.23E-94	0.76200063	0.731	0.355	7.31E-90	1.64E-92	69.94069355	91.78561124	black
HSBP1	3.67E-94	0.960175334	0.41	0.122	8.29E-90	1.85E-92	88.08006154	91.73330992	black
BTBD9	4.11E-94	0.663525271	0.848	0.513	9.28E-90	2.06E-92	60.83652984	91.68683163	black
CDC37L1	1.30E-93	0.906735866	0.541	0.21	2.93E-89	6.45E-92	82.68545557	91.19023378	black
TMED9	2.07E-93	0.827070647	0.566	0.223	4.67E-89	1.02E-91	75.25492359	90.98971642	black
MECR	2.09E-93	1.007958496	0.434	0.14	4.71E-89	1.03E-91	91.71245103	90.98832084	red
TECR	1.12E-92	0.533526529	0.975	0.79	2.53E-88	5.49E-91	48.1565171	90.26077335	black
COX6C	1.31E-92	0.719653052	0.721	0.341	2.95E-88	6.36E-91	64.9103224	90.19668881	black
EMC4	2.78E-92	0.915380929	0.481	0.169	6.28E-88	1.35E-90	82.26599552	89.87077716	black
STMN3	2.88E-92	0.598606693	0.933	0.641	6.51E-88	1.39E-90	53.78963014	89.85805004	black
CFL1	3.53E-92	0.80507381	0.553	0.213	7.98E-88	1.69E-90	72.27298049	89.77186883	black
P2RY14	1.36E-91	1.001628481	0.409	0.127	3.08E-87	6.50E-90	89.33260335	89.18736346	red
SGK1	1.40E-91	0.847810682	0.581	0.243	3.16E-87	6.63E-90	75.60646916	89.17848144	black
TMEM59L	1.64E-91	0.702547109	0.753	0.377	3.71E-87	7.73E-90	62.60517514	89.11171125	black
SQSTM1	3.03E-91	0.973513653	0.403	0.123	6.84E-87	1.42E-89	86.49451036	88.84776303	black
DNAJC3	6.59E-91	1.051112299	0.355	0.095	1.49E-86	3.07E-89	93.03658391	88.51250623	red
BORCS5	8.81E-91	1.15084221	0.291	0.061	1.99E-86	4.09E-89	101.7210298	88.38833761	red
TUBB4A	1.34E-90	0.938415961	0.501	0.186	3.02E-86	6.17E-89	82.77736913	88.2096773	black
SLC25A5	2.00E-90	1.24312595	0.285	0.059	4.52E-86	9.17E-89	109.44169	88.03749132	red
ATP5O	4.79E-90	0.924613015	0.408	0.125	1.08E-85	2.19E-88	81.05168807	87.66012024	black
NDUFB2	6.45E-90	0.965696703	0.38	0.109	1.46E-85	2.93E-88	84.53017721	87.53284233	black
NTMT1	1.59E-89	1.106607568	0.312	0.073	3.60E-85	7.20E-88	96.43276186	87.14269147	red
UBE4BOS1	1.78E-89	1.671779173	0.164	0.004	4.02E-85	7.99E-88	145.6074473	87.09729709	red
TPR	2.44E-89	0.707531828	0.737	0.365	5.51E-85	1.09E-87	61.528433	86.96207086	black
CSRP1	1.71E-88	1.594919047	0.237	0.038	3.87E-84	7.62E-87	137.3508884	86.11778055	red
DYNLL1	1.82E-88	0.866502112	0.422	0.136	4.11E-84	8.05E-87	74.60083429	86.09423247	black
ERMN	2.07E-88	1.658642519	0.179	0.011	4.69E-84	9.14E-87	142.7078241	86.0389279	red
DISC1	3.75E-88	1.322600835	0.237	0.036	8.48E-84	1.65E-86	113.4574443	85.78358736	red
MAN2B1	3.78E-88	1.156772767	0.28	0.057	8.55E-84	1.65E-86	99.23037209	85.78207829	red
MRPS18A	9.24E-88	0.990987493	0.392	0.12	2.09E-83	4.01E-86	84.6270554	85.39669368	black
ATP6AP2	9.73E-88	0.751649064	0.605	0.257	2.20E-83	4.21E-86	64.17289835	85.37614354	black
CCNL2	1.26E-87	0.732877018	0.622	0.266	2.85E-83	5.42E-86	62.48958732	85.26613027	black
RPS6	3.26E-87	0.811885925	0.527	0.204	7.37E-83	1.40E-85	68.89264183	84.85507591	black
SHISA4	3.83E-87	0.850311476	0.442	0.15	8.65E-83	1.63E-85	72.09617759	84.78796253	black
GABARAPL2	8.41E-87	0.944527644	0.474	0.177	1.90E-82	3.57E-85	79.76340015	84.44792556	black
SIRT3	1.82E-86	1.011825247	0.334	0.088	4.12E-82	7.69E-85	85.10865374	84.11398512	red
MRFAP1	2.31E-86	0.871015837	0.42	0.136	5.22E-82	9.69E-85	73.17729133	84.01373225	black
ATP5L	4.79E-86	0.715149183	0.619	0.269	1.08E-81	2.00E-84	59.8568137	83.69835989	black
ATP5H	5.78E-86	0.792665265	0.546	0.219	1.31E-81	2.41E-84	66.28169331	83.61876854	black
CNOT3	7.22E-86	0.818076878	0.485	0.177	1.63E-81	2.99E-84	68.32971098	83.52480407	black
NELFB	2.14E-85	0.876003145	0.387	0.117	4.84E-81	8.82E-84	72.7561093	83.05462111	black
CTNNA3	2.94E-85	0.842787877	0.586	0.26	6.65E-81	1.21E-83	69.88279703	82.91860729	black
BLOC1S2	3.73E-85	0.92202468	0.346	0.094	8.44E-81	1.52E-83	76.3594411	82.81713361	black
RPL23A	3.86E-85	0.747577207	0.602	0.258	8.73E-81	1.57E-83	61.90257283	82.80425386	black
HSPA5	3.91E-85	0.755344652	0.622	0.28	8.83E-81	1.58E-83	62.54347946	82.80124745	black
PDIA6	4.22E-85	0.87736174	0.43	0.144	9.55E-81	1.70E-83	72.6187713	82.76947575	black
PPP1R14A	5.21E-85	1.448646253	0.192	0.018	1.18E-80	2.08E-83	119.7760156	82.68134153	red
NDUFS4	5.22E-85	0.636031747	0.745	0.362	1.18E-80	2.08E-83	52.58795806	82.68134153	black
SF3B2	5.64E-85	0.76948235	0.564	0.229	1.27E-80	2.24E-83	63.59773651	82.65002633	black
TMEM59	1.10E-84	0.70548774	0.64	0.284	2.48E-80	4.33E-83	58.10617584	82.3631263	black
AGAP1	1.99E-84	0.632127508	0.848	0.498	4.49E-80	7.82E-83	51.90207	82.10696308	black
MFSD11	2.64E-84	0.854303314	0.436	0.15	5.97E-80	1.03E-82	70.04027274	81.9852523	black
H3F3A	2.79E-84	0.929975431	0.387	0.12	6.31E-80	1.09E-82	76.22359065	81.9630155	black
EMC3	3.60E-84	0.962400899	0.372	0.111	8.14E-80	1.40E-82	78.77651259	81.85415522	black
DLG2	4.01E-84	-0.36460363	1	0.999	9.06E-80	1.55E-82	29.82809717	81.80965496	black
GM47283	4.26E-84	0.656150493	0.741	0.382	9.62E-80	1.64E-82	53.66363973	81.78556642	black
MEF2C	5.19E-84	1.306768218	0.368	0.121	1.17E-79	1.99E-82	106.7644715	81.70115412	red
PDE4A	5.81E-84	0.709776659	0.649	0.295	1.31E-79	2.22E-82	57.95615653	81.65407501	black
NDUFS5	9.06E-84	0.769981165	0.498	0.188	2.05E-79	3.44E-82	62.72499403	81.46302391	black
GM9856	1.14E-83	0.951851326	0.326	0.084	2.59E-79	4.33E-82	77.4460591	81.363609	black
BAIAP2	1.19E-83	0.938382039	0.495	0.196	2.68E-79	4.47E-82	76.33673574	81.34931464	black
RPS27A	3.11E-83	0.722544741	0.569	0.234	7.04E-79	1.17E-81	58.47745076	80.93263638	black
ADGRL3	3.97E-83	-0.474926534	0.995	0.983	8.97E-79	1.48E-81	38.3878193	80.82896311	black
ZFP740	9.13E-83	0.755068542	0.496	0.187	2.06E-78	3.40E-81	60.75953574	80.46890094	black
VPS9D1	1.21E-82	0.916059538	0.383	0.12	2.73E-78	4.48E-81	73.60415428	80.34865771	black
GM15398	1.71E-82	1.209580861	0.326	0.091	3.86E-78	6.31E-81	97.00867448	80.20023928	red
CPNE5	1.79E-82	0.999537632	0.408	0.138	4.04E-78	6.57E-81	80.14543518	80.18250897	black
SNHG3	2.14E-82	1.373227011	0.213	0.03	4.84E-78	7.84E-81	110.0035672	80.10588662	red
JUND	2.15E-82	0.915021795	0.371	0.113	4.87E-78	7.85E-81	73.29799587	80.10519125	black
DNM2	7.86E-82	0.749898534	0.533	0.217	1.78E-77	2.85E-80	59.65053771	79.54481172	black
IDE	8.20E-82	0.751858928	0.458	0.164	1.85E-77	2.96E-80	59.79417444	79.52844907	black
NCEH1	2.21E-81	0.756219547	0.586	0.255	4.99E-77	7.95E-80	59.81661415	79.09953454	black
BACH2	2.65E-81	0.760889453	0.649	0.31	6.00E-77	9.51E-80	60.12679649	79.02172414	black
RPL3	3.64E-81	0.704200387	0.668	0.316	8.23E-77	1.30E-79	55.55175403	78.88628727	black
HERC1	3.99E-81	-0.741820344	0.843	0.82	9.02E-77	1.42E-79	58.49115608	78.84814229	black
CACNA1A	6.53E-81	0.564452023	0.971	0.823	1.48E-76	2.31E-79	44.38636835	78.63621097	black
PACSIN1	7.11E-81	0.576299271	0.877	0.556	1.61E-76	2.51E-79	45.29764031	78.60089817	black
NME1	8.53E-81	0.830330317	0.385	0.122	1.93E-76	3.00E-79	65.20030405	78.52333305	black
BEX2	1.55E-80	0.716420096	0.608	0.269	3.51E-76	5.43E-79	56.07068626	78.2650941	black
SEC62	1.97E-80	0.584614394	0.87	0.559	4.46E-76	6.87E-79	45.6950712	78.1627542	black
METTL2	2.44E-80	0.866304757	0.35	0.102	5.52E-76	8.48E-79	67.63363011	78.07140564	black
RCHY1	3.47E-80	0.77549135	0.482	0.182	7.84E-76	1.20E-78	60.42706763	77.92100789	black
RPS11	4.18E-80	0.713185785	0.568	0.238	9.44E-76	1.44E-78	55.51588365	77.84210624	black
CCK	5.02E-80	0.8114924	0.4	0.135	1.14E-75	1.72E-78	63.10470167	77.76376179	black
RPL24	9.41E-80	0.675774998	0.598	0.257	2.13E-75	3.22E-78	52.36770589	77.4928135	black
ARPC1A	1.21E-79	0.723486344	0.481	0.18	2.74E-75	4.12E-78	55.98707844	77.38512128	black
STK19	1.26E-79	0.757537152	0.441	0.155	2.86E-75	4.29E-78	58.60886377	77.36764281	black
GMCL1	1.45E-79	0.652041127	0.707	0.355	3.27E-75	4.88E-78	50.41020292	77.31138544	black
CSMD3	1.47E-79	-0.470744866	0.989	0.981	3.32E-75	4.94E-78	36.39136984	77.30593037	black
UBL5	1.49E-79	0.898886953	0.36	0.109	3.36E-75	4.98E-78	69.48648424	77.30280656	black
TUBB2A	1.54E-79	0.764242434	0.488	0.187	3.48E-75	5.14E-78	59.06745237	77.28889382	black
RPS3	1.58E-79	0.808345685	0.43	0.15	3.58E-75	5.27E-78	62.46771322	77.27846439	black
FDPS	2.33E-79	1.167141826	0.265	0.058	5.28E-75	7.74E-78	90.00002519	77.1114728	red
TCF7L2	4.14E-79	0.833117528	0.663	0.38	9.35E-75	1.37E-77	64.03720942	76.86455662	black
TMEM186	5.75E-79	0.901322788	0.347	0.103	1.30E-74	1.89E-77	69.15214654	76.72295375	black
ANKRD24	5.83E-79	0.776490005	0.588	0.265	1.32E-74	1.91E-77	59.57114535	76.71849604	black
STMN4	1.92E-78	0.814536164	0.465	0.177	4.34E-74	6.27E-77	62.07016045	76.2030751	black
PDCD7	2.24E-78	0.790115953	0.471	0.177	5.06E-74	7.28E-77	60.15777241	76.1379038	black
CIT	2.35E-78	0.585946417	0.899	0.614	5.31E-74	7.62E-77	44.60111528	76.1180783	black
NDN	5.78E-78	0.651008134	0.585	0.253	1.31E-73	1.87E-76	49.29994624	75.7286179	black
FAM133B	8.12E-78	0.723745274	0.52	0.209	1.84E-73	2.61E-76	54.70269687	75.58280359	black
COX5B	8.84E-78	0.776022878	0.525	0.218	2.00E-73	2.83E-76	58.62656959	75.54747577	black
GDE1	1.48E-77	0.712676658	0.479	0.183	3.33E-73	4.71E-76	53.68358982	75.32671267	black
RPS16	1.48E-77	0.783701091	0.494	0.196	3.35E-73	4.71E-76	59.03356036	75.3266278	black
TRIM26	1.57E-77	0.939939036	0.297	0.076	3.55E-73	4.99E-76	70.77946589	75.30218786	black
KIF3A	1.64E-77	0.701292128	0.559	0.24	3.70E-73	5.18E-76	52.7973567	75.28582535	black
RAE1	1.76E-77	0.720753505	0.458	0.168	3.97E-73	5.53E-76	54.24169103	75.25692298	black
MBNL2	2.66E-77	0.592895048	0.86	0.534	6.00E-73	8.33E-76	44.51411601	75.07925075	black
DDRGK1	3.60E-77	0.709619711	0.477	0.18	8.14E-73	1.13E-75	53.18506271	74.94868291	black
QDPR	4.98E-77	1.187044018	0.25	0.053	1.13E-72	1.55E-75	88.80216393	74.80949535	red
PSMD9	5.25E-77	0.839790639	0.395	0.132	1.19E-72	1.63E-75	62.80624271	74.78797664	black
NDUFB9	7.54E-77	0.838284122	0.416	0.147	1.71E-72	2.33E-75	62.56270912	74.63186701	black
ZKSCAN1	7.82E-77	0.885023624	0.334	0.097	1.77E-72	2.41E-75	66.0387524	74.61806739	black
MRPS10	1.22E-76	0.920134716	0.316	0.087	2.76E-72	3.75E-75	68.48219843	74.42627397	black
RPS8	3.01E-76	0.574105745	0.777	0.411	6.81E-72	9.22E-75	42.50409627	74.03530908	black
PVALB	3.28E-76	1.064676469	0.272	0.065	7.42E-72	1.00E-74	78.78557776	73.99954829	red
SRP14	3.41E-76	0.911017246	0.326	0.093	7.71E-72	1.04E-74	67.40074915	73.98405404	black
UQCRB	4.05E-76	0.826347568	0.391	0.131	9.16E-72	1.23E-74	61.07607612	73.91088026	black
EVL	5.02E-76	0.593744435	0.753	0.394	1.14E-71	1.52E-74	43.82974676	73.81921274	black
ENO1	5.29E-76	0.835213886	0.38	0.125	1.20E-71	1.59E-74	61.63735952	73.79829351	black
SF3B6	6.47E-76	0.803850051	0.378	0.123	1.46E-71	1.94E-74	59.25406808	73.71283741	black
PSMB5	6.48E-76	0.924291535	0.33	0.097	1.47E-71	1.94E-74	68.13215163	73.71283741	black
PRDX5	7.35E-76	0.742681516	0.444	0.161	1.66E-71	2.19E-74	54.70586707	73.65992807	black
RMDN1	7.69E-76	0.576268329	0.796	0.438	1.74E-71	2.28E-74	42.43734372	73.64163806	black
DBI	8.38E-76	0.993396847	0.284	0.07	1.89E-71	2.48E-74	73.11982343	73.60585417	black
CLMN	8.99E-76	1.08109553	0.31	0.088	2.03E-71	2.65E-74	79.54327177	73.57654305	red
RPL10	1.43E-75	0.650880463	0.593	0.261	3.23E-71	4.20E-74	47.75938218	73.37657971	black
ITM2C	1.67E-75	0.661676174	0.785	0.449	3.77E-71	4.88E-74	48.50835726	73.31132539	black
FTL1	1.97E-75	0.868860701	0.391	0.133	4.46E-71	5.76E-74	63.63483415	73.23939736	black
FGF1	2.04E-75	1.137559378	0.245	0.052	4.61E-71	5.93E-74	83.29961152	73.22660524	red
BC005624	2.08E-75	0.908438504	0.314	0.087	4.70E-71	6.03E-74	66.51561581	73.21972318	black
MOK	2.27E-75	0.940908004	0.327	0.096	5.13E-71	6.56E-74	68.85826873	73.18278558	black
PRDX2	2.39E-75	0.799822102	0.409	0.143	5.41E-71	6.89E-74	58.51620723	73.16152812	black
GSE1	3.00E-75	0.668254416	0.58	0.257	6.78E-71	8.62E-74	48.8257422	73.06460086	black
RIMS1	3.59E-75	-0.454457563	0.973	0.963	8.12E-71	1.03E-73	33.16994534	72.9879928	black
TTC19	3.99E-75	0.636597119	0.772	0.423	9.01E-71	1.14E-73	46.43592806	72.9439808	black
SNW1	4.01E-75	0.994840614	0.314	0.089	9.07E-71	1.14E-73	72.56614459	72.94248302	black
TM2D3	4.48E-75	0.639711317	0.557	0.235	1.01E-70	1.27E-73	46.63236816	72.89595623	black
RBM26	8.21E-75	-0.998328253	0.657	0.675	1.86E-70	2.32E-73	72.51314896	72.63457559	black
NDUFB5	8.90E-75	0.728893218	0.508	0.208	2.01E-70	2.51E-73	52.91809027	72.60060725	black
CD9	9.09E-75	1.719095791	0.157	0.011	2.06E-70	2.55E-73	124.7940988	72.5928709	red
RPL19	1.49E-74	0.66596922	0.622	0.287	3.37E-70	4.18E-73	48.20231984	72.37920072	black
CALY	1.92E-74	0.602648087	0.798	0.449	4.33E-70	5.35E-73	43.55443559	72.2717561	black
TIMM23	2.05E-74	0.732703486	0.419	0.15	4.62E-70	5.69E-73	52.93415507	72.2449887	black
PGAM1	2.36E-74	0.728579448	0.474	0.184	5.33E-70	6.54E-73	52.59208553	72.18442089	black
ALDOC	2.62E-74	0.821648347	0.376	0.125	5.92E-70	7.24E-73	59.27386188	72.1401827	black
WASL	3.11E-74	0.757420689	0.446	0.166	7.02E-70	8.56E-73	54.58561044	72.06775741	black
SLC35B1	3.26E-74	0.663588038	0.439	0.159	7.36E-70	8.95E-73	47.81036619	72.048264	black
LETM2	3.81E-74	0.673233839	0.535	0.224	8.61E-70	1.04E-72	48.4605862	71.98180392	black
SCPEP1OS	6.13E-74	1.479700461	0.142	0.005	1.38E-69	1.67E-72	106.2080848	71.77674644	red
BNIP3L	6.18E-74	0.926263458	0.333	0.101	1.40E-69	1.68E-72	66.48180205	71.77418204	black
PGP	1.80E-73	1.008304711	0.285	0.075	4.06E-69	4.88E-72	71.90398505	71.31176151	red
D130043K22RIK	2.45E-73	0.829405986	0.427	0.161	5.55E-69	6.64E-72	59.03558961	71.17815718	black
SELENOK	3.83E-73	0.683431582	0.555	0.24	8.66E-69	1.03E-71	48.51396667	70.98584259	black
IFT122	4.43E-73	0.830745782	0.342	0.106	1.00E-68	1.19E-71	58.92001392	70.92424083	black
NAXD	5.42E-73	0.906152652	0.297	0.08	1.22E-68	1.45E-71	64.19026026	70.83824135	black
GSTZ1	5.67E-73	0.807175199	0.375	0.125	1.28E-68	1.52E-71	57.16375714	70.81951624	black
TCTA	6.04E-73	0.980522204	0.243	0.052	1.36E-68	1.61E-71	69.4146616	70.7935642	black
X4930549G23RIK	7.03E-73	0.921450082	0.298	0.082	1.59E-68	1.87E-71	65.17289909	70.72862695	black
YWHAH	7.94E-73	0.659067226	0.55	0.239	1.80E-68	2.10E-71	46.58095587	70.67709341	black
CFDP1	9.62E-73	0.700223773	0.505	0.207	2.17E-68	2.54E-71	49.4325151	70.59531115	black
RPL35A	1.04E-72	0.64808551	0.589	0.264	2.34E-68	2.73E-71	45.73181744	70.56448062	black
GM5141	1.70E-72	1.17459903	0.203	0.033	3.84E-68	4.45E-71	82.63470672	70.35141748	red
BCAP31	3.22E-72	0.818521496	0.404	0.145	7.27E-68	8.42E-71	57.35762421	70.07467059	black
GM43713	3.47E-72	0.919820324	0.307	0.088	7.84E-68	9.05E-71	64.42719645	70.04324082	black
ACTG1	5.47E-72	0.657369259	0.539	0.23	1.24E-67	1.42E-70	45.91504446	69.84665598	black
COX7A2	8.06E-72	0.711472694	0.491	0.201	1.82E-67	2.09E-70	49.57532887	69.67987571	black
CLPP	9.56E-72	0.622983329	0.595	0.274	2.16E-67	2.47E-70	43.36412641	69.60720202	black
ROBO1	1.14E-71	-0.644805339	0.95	0.927	2.59E-67	2.95E-70	44.8333703	69.53008545	black
SLC38A2	1.21E-71	0.640821241	0.695	0.355	2.74E-67	3.12E-70	44.54093267	69.50601794	black
RAB2A	1.64E-71	0.632187317	0.626	0.29	3.71E-67	4.21E-70	43.85837679	69.37560378	black
CHGA	2.05E-71	0.611601304	0.649	0.313	4.62E-67	5.23E-70	42.37283769	69.28179755	black
GRIA3	2.35E-71	-0.818127183	0.781	0.798	5.32E-67	6.00E-70	56.63223915	69.22180356	black
PITPNA	3.41E-71	0.619119513	0.7	0.361	7.71E-67	8.67E-70	42.75767372	69.06206775	black
H3F3B	3.71E-71	0.748901874	0.431	0.161	8.38E-67	9.40E-70	51.69446723	69.0270235	black
RHEB	3.89E-71	0.751566726	0.457	0.181	8.80E-67	9.84E-70	51.86336507	69.00700001	black
SNCB	4.36E-71	0.604675299	0.665	0.326	9.86E-67	1.10E-69	41.69792401	68.95919858	black
RPS4X	7.39E-71	0.781803526	0.427	0.159	1.67E-66	1.86E-69	53.73448915	68.73144899	black
SELENOS	7.87E-71	0.982802259	0.294	0.083	1.78E-66	1.97E-69	67.52390962	68.70548883	black
CYCS	9.70E-71	0.933912046	0.292	0.081	2.19E-66	2.42E-69	64.08083949	68.6154973	black
ACSL1	9.87E-71	0.710013918	0.44	0.166	2.23E-66	2.46E-69	48.71373765	68.60955313	black
LRP1B	1.02E-70	-0.540417105	0.987	0.987	2.31E-66	2.54E-69	37.07004263	68.59524297	black
GRIA4	1.08E-70	-0.451264622	0.988	0.976	2.44E-66	2.67E-69	30.94467089	68.57322589	black
TPI1	1.46E-70	0.767899798	0.438	0.168	3.31E-66	3.61E-69	52.55661825	68.44202644	black
RPS17	1.74E-70	0.744458221	0.45	0.176	3.94E-66	4.29E-69	50.89651851	68.36719253	black
RPS2	2.40E-70	0.657268154	0.611	0.283	5.43E-66	5.90E-69	44.84463037	68.22881966	black
CNIH1	2.73E-70	0.882592243	0.329	0.102	6.17E-66	6.69E-69	60.17033862	68.17456088	black
SLCO3A1	2.77E-70	0.691647604	0.635	0.318	6.25E-66	6.76E-69	47.14973534	68.17017089	black
IFT52	4.05E-70	0.773054343	0.385	0.136	9.15E-66	9.86E-69	52.57255929	68.00629187	black
ATE1	4.15E-70	0.758229714	0.387	0.136	9.38E-66	1.01E-68	51.55708734	67.99665904	black
ANK	9.91E-70	0.624574987	0.646	0.318	2.24E-65	2.40E-68	42.2335123	67.61960244	black
DYNC1LI2	1.03E-69	0.681568154	0.49	0.201	2.34E-65	2.50E-68	46.07563666	67.60239075	black
ATP2C1	1.85E-69	0.624520645	0.672	0.341	4.17E-65	4.45E-68	42.06254737	67.35173243	black
MDH2	2.33E-69	0.71093126	0.428	0.161	5.28E-65	5.61E-68	47.81099635	67.25122247	black
FSD1	2.49E-69	0.695240058	0.445	0.171	5.63E-65	5.96E-68	46.73711392	67.2244261	black
RPS7	2.73E-69	0.646679681	0.53	0.225	6.16E-65	6.52E-68	43.44787386	67.18608165	black
RPL27A	3.12E-69	0.623293656	0.692	0.352	7.06E-65	7.44E-68	41.84075627	67.12848084	black
SPCS2	3.18E-69	0.77032045	0.449	0.18	7.18E-65	7.55E-68	51.70539094	67.12192429	black
ATP5MD	4.95E-69	0.659226657	0.543	0.238	1.12E-64	1.17E-67	44.12230969	66.93040886	black
SPOCK3	5.29E-69	-0.868147125	0.702	0.75	1.20E-64	1.25E-67	58.08135486	66.90266341	black
BOD1L	7.73E-69	0.574181666	0.638	0.305	1.75E-64	1.82E-67	38.32057699	66.73946466	black
GLO1	8.82E-69	0.93099067	0.272	0.072	1.99E-64	2.07E-67	62.08129738	66.68304997	black
NEFM	1.18E-68	0.947003587	0.346	0.119	2.67E-64	2.77E-67	63.03017913	66.55748717	black
ZDHHC14	1.24E-68	0.649990064	0.488	0.202	2.80E-64	2.90E-67	43.24890373	66.53779203	black
MCCC1	1.33E-68	0.682041776	0.442	0.173	3.00E-64	3.09E-67	45.36230048	66.50956302	black
GALNTL6	1.39E-68	-0.803402279	0.919	0.926	3.14E-64	3.23E-67	53.41832387	66.49013239	black
NRGN	1.83E-68	0.824842535	0.372	0.132	4.14E-64	4.25E-67	54.74638573	66.37192359	black
FA2H	2.47E-68	1.799549011	0.169	0.022	5.59E-64	5.72E-67	119.206851	66.24262541	red
CAMK2A	2.62E-68	0.631022651	0.739	0.406	5.93E-64	6.06E-67	41.78496718	66.21785626	black
TIMM17A	3.22E-68	0.849021596	0.289	0.081	7.28E-64	7.41E-67	56.14579381	66.12999489	black
B4GAT1	3.35E-68	0.841296257	0.327	0.103	7.58E-64	7.70E-67	55.62104075	66.11350077	black
FKBP4	3.57E-68	0.70479385	0.352	0.116	8.06E-64	8.17E-67	46.57837963	66.08794844	black
EMC10	4.58E-68	0.553771457	0.647	0.307	1.03E-63	1.05E-66	36.53822891	65.98070092	black
HNRNPH3	4.94E-68	0.568961228	0.689	0.347	1.12E-63	1.13E-66	37.52228722	65.94875951	black
HDGF	5.50E-68	0.586569896	0.548	0.238	1.24E-63	1.25E-66	38.65750628	65.90434748	black
NBEA	5.50E-68	-0.431395243	0.98	0.96	1.24E-63	1.25E-66	28.43082202	65.90434748	black
CFAP54	7.76E-68	0.728266889	0.407	0.153	1.75E-63	1.75E-66	47.88777359	65.75580228	black
GSTM5	7.93E-68	0.989801139	0.24	0.055	1.79E-63	1.79E-66	65.07769633	65.74825364	black
POMP	7.94E-68	0.974542166	0.273	0.075	1.79E-63	1.79E-66	64.07444551	65.74825364	black
PDHB	8.54E-68	0.641112291	0.441	0.17	1.93E-63	1.92E-66	42.13239107	65.71764673	black
D030068K23RIK	8.97E-68	0.943764055	0.378	0.141	2.03E-63	2.01E-66	62.0026914	65.69723768	black
PMS2	1.39E-67	0.917673326	0.288	0.081	3.13E-63	3.09E-66	60.11617616	65.50934246	black
A230006K03RIK	1.62E-67	-0.51434523	0.946	0.908	3.65E-63	3.60E-66	33.66077915	65.4439415	black
MORN1	2.39E-67	0.807671673	0.318	0.098	5.39E-63	5.30E-66	52.72137139	65.27574651	black
SON	2.69E-67	0.516380441	0.901	0.615	6.08E-63	5.96E-66	33.68076779	65.22471631	black
PDIA3	3.71E-67	0.710296447	0.429	0.165	8.39E-63	8.20E-66	46.2303044	65.08592941	black
SLC3A2	4.21E-67	0.693113581	0.432	0.166	9.52E-63	9.29E-66	45.07461195	65.03207151	black
ATAT1	4.28E-67	0.679192435	0.424	0.164	9.68E-63	9.42E-66	44.1652592	65.02613538	black
CCDC58	5.54E-67	0.822372655	0.354	0.122	1.25E-62	1.21E-65	53.38482454	64.91561242	black
LARS	5.67E-67	0.645492951	0.501	0.214	1.28E-62	1.24E-65	41.89676891	64.90662505	black
YPEL3	5.68E-67	0.581263065	0.568	0.255	1.28E-62	1.24E-65	37.72782383	64.90662505	black
SAR1B	6.18E-67	0.802169086	0.331	0.108	1.40E-62	1.35E-65	52.03761096	64.8711249	black
LNCPINT	6.54E-67	0.498298931	0.924	0.671	1.48E-62	1.42E-65	32.31342201	64.84746399	black
RPL11	8.00E-67	0.620029172	0.637	0.315	1.81E-62	1.73E-65	40.15394152	64.76137464	black
RPL4	8.03E-67	0.679644322	0.44	0.172	1.81E-62	1.73E-65	44.01425623	64.76072083	black
SUB1	9.12E-67	0.802037445	0.33	0.107	2.06E-62	1.97E-65	51.89678395	64.7061858	black
TIMM9	1.24E-66	0.544293026	0.702	0.363	2.80E-62	2.67E-65	35.14727189	64.57417276	black
DCTN4	1.30E-66	0.62762801	0.53	0.232	2.93E-62	2.78E-65	40.5167661	64.55538221	black
SELENOF	1.35E-66	0.740148201	0.376	0.133	3.06E-62	2.90E-65	47.7675337	64.53779612	black
RNF114	1.45E-66	0.746619915	0.35	0.117	3.29E-62	3.10E-65	48.16311077	64.50820536	black
MYL12B	1.69E-66	0.693930362	0.388	0.141	3.83E-62	3.61E-65	44.71901523	64.44308776	black
SCN1B	1.70E-66	0.636200588	0.61	0.299	3.84E-62	3.61E-65	40.99871093	64.44305727	black
GM20275	1.78E-66	0.944120942	0.262	0.069	4.03E-62	3.78E-65	60.82283264	64.42271316	black
CYP51	2.74E-66	0.884636222	0.297	0.089	6.20E-62	5.80E-65	56.82613445	64.23672582	black
DPM1	3.39E-66	0.602618408	0.524	0.23	7.67E-62	7.16E-65	38.65508319	64.14520812	black
GM26724	4.81E-66	1.19464592	0.174	0.025	1.09E-61	1.01E-64	76.45139731	63.99502648	red
HARS	5.17E-66	0.810287775	0.303	0.091	1.17E-61	1.08E-64	51.82985778	63.96475347	black
TM7SF3	6.00E-66	0.924515577	0.252	0.064	1.36E-61	1.26E-64	59.07753091	63.901066	black
ATP6V1F	6.75E-66	0.736029354	0.372	0.132	1.53E-61	1.41E-64	46.99598461	63.85069339	black
ZFP74	8.20E-66	0.864837778	0.326	0.104	1.85E-61	1.71E-64	55.1480769	63.76696103	black
RPL15	8.58E-66	0.640314669	0.426	0.163	1.94E-61	1.78E-64	40.81919984	63.74865645	black
CISD2	9.09E-66	0.719645693	0.41	0.155	2.05E-61	1.89E-64	45.8591915	63.72467997	black
BASP1	9.14E-66	0.565746137	0.67	0.339	2.07E-61	1.89E-64	36.05116281	63.72321515	black
TSPAN5	1.00E-65	0.59267152	0.763	0.442	2.26E-61	2.07E-64	37.74429444	63.68501468	black
SERINC1	2.06E-65	0.53493729	0.868	0.55	4.66E-61	4.25E-64	33.90001465	63.37194157	black
ATP5B	2.28E-65	0.566010281	0.673	0.336	5.15E-61	4.68E-64	35.84503501	63.32930017	black
MAU2	2.39E-65	0.643226532	0.503	0.216	5.40E-61	4.90E-64	40.72242211	63.30961194	black
GOT2	3.32E-65	0.635659054	0.465	0.19	7.51E-61	6.79E-64	40.15323326	63.16787753	black
ARHGAP23	3.46E-65	0.773974593	0.5	0.225	7.81E-61	7.05E-64	48.87776612	63.15164165	black
NAP1L3	5.65E-65	1.007073096	0.228	0.052	1.28E-60	1.15E-63	63.38405757	62.93888479	red
RPL14	6.02E-65	0.567536135	0.631	0.306	1.36E-60	1.22E-63	35.70526815	62.91276617	black
TTLL7	7.22E-65	0.619455771	0.612	0.303	1.63E-60	1.46E-63	38.92335423	62.83475923	black
NDUFA10	7.65E-65	0.586686943	0.523	0.228	1.73E-60	1.55E-63	36.85010743	62.81051222	black
MIF	7.82E-65	0.692769359	0.392	0.145	1.77E-60	1.58E-63	43.5071196	62.80173771	black
PEX19	8.93E-65	0.919960699	0.292	0.087	2.02E-60	1.80E-63	57.72320044	62.74528953	black
DEGS1	1.09E-64	0.834345693	0.279	0.08	2.47E-60	2.19E-63	52.27913584	62.65884307	black
STMN2	1.56E-64	0.5776697	0.754	0.425	3.52E-60	3.12E-63	36.10737411	62.50522419	black
VCP	2.19E-64	0.611659858	0.514	0.224	4.96E-60	4.39E-63	38.14175027	62.35777906	black
FTL1.PS1	2.78E-64	1.413025405	0.123	0.005	6.27E-60	5.53E-63	87.97131897	62.25742201	red
PFDN2	2.78E-64	0.643802869	0.443	0.177	6.28E-60	5.53E-63	40.08150693	62.25742201	black
PPP1R16B	2.86E-64	0.774721364	0.479	0.211	6.46E-60	5.68E-63	48.22321733	62.24588549	black
TMED2	2.92E-64	0.686850218	0.389	0.144	6.61E-60	5.80E-63	42.7474455	62.23692504	black
POLB	3.01E-64	0.540491591	0.787	0.455	6.80E-60	5.94E-63	33.63259658	62.2259386	black
PLLP	4.34E-64	1.353956218	0.162	0.021	9.80E-60	8.55E-63	84.03720735	62.06789127	red
PIGP	5.41E-64	0.983771557	0.247	0.064	1.22E-59	1.06E-62	60.96709829	61.97282067	black
TIMMDC1	6.94E-64	0.714044301	0.398	0.152	1.57E-59	1.36E-62	44.17489542	61.86576289	black
PGAM5	7.53E-64	0.868473626	0.273	0.078	1.70E-59	1.48E-62	53.69867173	61.83109091	black
X6330403K07RIK	7.65E-64	0.658134472	0.584	0.286	1.73E-59	1.50E-62	40.68921792	61.82508234	black
COPE	7.80E-64	0.676980464	0.387	0.142	1.76E-59	1.52E-62	41.84921192	61.81745873	black
TSNAX	9.00E-64	0.695713037	0.358	0.125	2.03E-59	1.75E-62	42.96489942	61.75663981	black
ASPA	9.65E-64	1.52991111	0.155	0.018	2.18E-59	1.87E-62	94.43726438	61.72728845	red
EXOSC1	1.76E-63	0.820969376	0.277	0.08	3.98E-59	3.41E-62	50.46272919	61.46724916	black
SFR1	1.83E-63	0.951631776	0.226	0.053	4.15E-59	3.55E-62	58.47801923	61.45025916	black
SORCS2	2.00E-63	0.810667443	0.471	0.211	4.52E-59	3.86E-62	49.78565858	61.41317133	black
CDK8	2.65E-63	0.589198719	0.592	0.279	6.00E-59	5.11E-62	36.11292863	61.29159396	black
TMEM246	3.03E-63	0.652152734	0.443	0.178	6.84E-59	5.81E-62	39.93500106	61.23565689	black
ITGB1	3.20E-63	0.631941436	0.456	0.189	7.23E-59	6.13E-62	38.68275301	61.21255989	black
RPL23	3.34E-63	0.569646302	0.569	0.261	7.54E-59	6.38E-62	34.85961007	61.1951837	black
RPL9	3.41E-63	0.566797442	0.639	0.311	7.70E-59	6.50E-62	34.68051289	61.18678447	black
KCTD13	3.42E-63	1.047077185	0.275	0.082	7.72E-59	6.51E-62	64.06709073	61.18659796	red
ZMAT2	3.89E-63	0.83549407	0.29	0.088	8.80E-59	7.39E-62	51.07468828	61.13112006	black
GM45435	4.14E-63	0.778524854	0.37	0.134	9.36E-59	7.85E-62	47.57170716	61.10493061	black
PDCD2L	4.99E-63	0.760846089	0.341	0.118	1.13E-58	9.45E-62	46.43034675	61.02462431	black
RPL8	5.24E-63	0.57229833	0.58	0.269	1.18E-58	9.89E-62	34.91301378	61.00491987	black
SPCS1	7.10E-63	0.63405982	0.461	0.19	1.60E-58	1.34E-61	38.5975264	60.87363552	black
GM15614	9.02E-63	1.151452652	0.167	0.025	2.04E-58	1.70E-61	69.97456406	60.77068296	red
CWC15	1.01E-62	0.803623921	0.315	0.102	2.28E-58	1.89E-61	48.79863514	60.7232237	black
FBXO21	1.07E-62	0.656900446	0.424	0.169	2.41E-58	2.00E-61	39.87386312	60.70000919	black
NDUFA8	1.38E-62	0.87295182	0.276	0.08	3.13E-58	2.58E-61	52.89010213	60.58765319	black
ANAPC16	1.40E-62	0.830570802	0.277	0.081	3.17E-58	2.61E-61	50.3184844	60.58301622	black
PTPN11	1.49E-62	0.580793763	0.454	0.186	3.36E-58	2.77E-61	35.1718101	60.55817464	black
NDUFB6	2.20E-62	0.908794237	0.246	0.064	4.98E-58	4.09E-61	54.88038939	60.38813533	black
RPL17	3.26E-62	0.554278967	0.614	0.298	7.37E-58	6.04E-61	33.37797427	60.21872786	black
DNAJC8	4.30E-62	0.552784988	0.478	0.201	9.72E-58	7.95E-61	33.22226401	60.09979423	black
YWHAQ	7.28E-62	0.626166302	0.486	0.211	1.65E-57	1.34E-60	37.48978208	59.87192533	black
NME7	7.78E-62	0.840569918	0.369	0.142	1.76E-57	1.43E-60	50.30301512	59.84393925	black
ERG28	8.07E-62	0.654427436	0.378	0.141	1.82E-57	1.48E-60	39.15374503	59.82900909	black
RPL37	1.02E-61	0.548142773	0.644	0.316	2.31E-57	1.87E-60	32.73961533	59.72826231	black
MRPS21	1.03E-61	0.7822202	0.316	0.105	2.32E-57	1.88E-60	46.71880208	59.72589573	black
PIK3IP1	1.05E-61	0.728471263	0.341	0.119	2.38E-57	1.92E-60	43.50140624	59.71602237	black
NDUFB4	1.14E-61	0.757130949	0.313	0.102	2.58E-57	2.08E-60	45.18674015	59.68153884	black
TMBIM6	1.21E-61	0.601927939	0.525	0.236	2.74E-57	2.21E-60	35.90893454	59.65653395	black
CCDC47	1.22E-61	0.632640759	0.465	0.196	2.75E-57	2.21E-60	37.74094183	59.65619708	black
NAGK	1.22E-61	0.658630373	0.422	0.171	2.76E-57	2.21E-60	39.29102599	59.65565453	black
MICAL2	1.45E-61	0.71278179	0.4	0.157	3.29E-57	2.63E-60	42.46789792	59.58050349	black
OLIG1	1.51E-61	1.300628492	0.138	0.012	3.41E-57	2.72E-60	77.47238345	59.56534394	red
SEC61A1	2.23E-61	0.663790159	0.357	0.128	5.05E-57	4.02E-60	39.42647869	59.39599762	black
GNG11	2.44E-61	1.290400634	0.129	0.009	5.52E-57	4.38E-60	76.59609813	59.35838538	red
XPNPEP1	3.41E-61	0.826871244	0.275	0.082	7.71E-57	6.11E-60	48.96214134	59.213743	black
CCDC191	3.49E-61	0.86344681	0.272	0.08	7.90E-57	6.25E-60	51.11974837	59.20428193	black
MAP7	3.69E-61	0.73191838	0.564	0.282	8.35E-57	6.59E-60	43.31572597	59.18108788	black
B230206L02RIK	3.94E-61	1.245658756	0.153	0.019	8.90E-57	7.02E-60	73.68557665	59.15390254	red
GRIA2	3.99E-61	-0.378068832	0.996	0.991	9.02E-57	7.10E-60	22.36239694	59.14900956	black
NDUFAF7	4.47E-61	0.567255695	0.444	0.182	1.01E-56	7.94E-60	33.52502441	59.10037516	black
ARFGAP1	4.55E-61	0.673764358	0.4	0.155	1.03E-56	8.06E-60	39.81515498	59.09359034	black
CCDC174	7.75E-61	0.656888947	0.433	0.178	1.75E-56	1.37E-59	38.66678642	58.86350593	black
RNASEK	7.93E-61	0.509643906	0.718	0.386	1.79E-56	1.40E-59	29.99466527	58.85416246	black
CTIF	9.44E-61	0.541572446	0.661	0.342	2.13E-56	1.66E-59	31.83344658	58.77966433	black
MLLT11	1.14E-60	0.666842032	0.412	0.164	2.57E-56	2.00E-59	39.14313828	58.69926669	black
SYNGR3	1.18E-60	0.592972523	0.592	0.286	2.67E-56	2.07E-59	34.79778414	58.68363674	black
ZFP408	1.33E-60	0.888726412	0.222	0.053	3.01E-56	2.33E-59	52.10843365	58.63270514	black
ANKRD11	1.51E-60	0.506511971	0.776	0.449	3.41E-56	2.64E-59	29.67107383	58.57921531	black
GM11867	1.75E-60	-0.399561842	0.978	0.951	3.94E-56	3.04E-59	23.38114855	58.51697052	black
SMAD7	1.75E-60	0.969919922	0.224	0.055	3.97E-56	3.05E-59	56.75532494	58.51547502	black
TUBB3	1.83E-60	0.528122205	0.648	0.334	4.14E-56	3.18E-59	30.89399823	58.49782101	black
SIPA1L1	1.93E-60	0.592426782	0.648	0.337	4.36E-56	3.34E-59	34.64263421	58.47580709	black
NRSN2	3.43E-60	0.547395711	0.666	0.347	7.75E-56	5.92E-59	31.87340159	58.2273499	black
UQCRQ	3.54E-60	0.569137596	0.459	0.194	7.99E-56	6.10E-59	33.13204306	58.21446921	black
PCGF6	4.05E-60	0.676305973	0.36	0.132	9.15E-56	6.97E-59	39.3318265	58.15685218	black
KRTCAP2	4.40E-60	0.663960928	0.403	0.158	9.94E-56	7.56E-59	38.59036276	58.12143626	black
SARAF	5.13E-60	0.534357049	0.638	0.323	1.16E-55	8.81E-59	31.02221686	58.05522148	black
PKIG	5.54E-60	0.698719962	0.358	0.132	1.25E-55	9.48E-59	40.54187308	58.02306404	black
X2700069I18RIK	5.60E-60	0.850658703	0.309	0.106	1.26E-55	9.56E-59	49.35474571	58.01944486	black
MAPRE2	5.96E-60	0.539508793	0.602	0.299	1.35E-55	1.02E-58	31.28750187	57.99257081	black
DPP10	9.48E-60	-0.873548912	0.87	0.9	2.14E-55	1.61E-58	50.48441364	57.79231472	black
GAD2	1.00E-59	1.046657152	0.238	0.065	2.27E-55	1.71E-58	60.46315368	57.76786941	red
DNAJC15	1.07E-59	0.634945157	0.366	0.135	2.42E-55	1.81E-58	36.66269033	57.74150713	black
PNKP	1.15E-59	0.749573873	0.301	0.098	2.59E-55	1.94E-58	43.25964412	57.71231586	black
TBCB	1.34E-59	0.774553535	0.297	0.096	3.03E-55	2.26E-58	44.6495154	57.64548658	black
CHUK	1.35E-59	0.521313251	0.562	0.263	3.04E-55	2.27E-58	30.05079344	57.64440745	black
KLF9	1.37E-59	0.710921395	0.347	0.127	3.11E-55	2.31E-58	40.97448493	57.63574601	black
MYO9A	1.60E-59	-0.611732566	0.853	0.809	3.61E-55	2.68E-58	35.21854721	57.57180371	black
EEF1A2	1.63E-59	0.599982382	0.435	0.178	3.68E-55	2.73E-58	34.53716658	57.56363455	black
HSPA12A	2.21E-59	0.684887055	0.41	0.166	5.00E-55	3.70E-58	39.33412529	57.43155019	black
HSPA4	2.26E-59	0.543082973	0.576	0.27	5.10E-55	3.77E-58	31.18573993	57.42352731	black
TMX2	2.37E-59	0.563791776	0.586	0.285	5.35E-55	3.95E-58	32.36384024	57.40388846	black
GM15283	2.40E-59	1.069623195	0.17	0.028	5.43E-55	4.00E-58	61.39438556	57.39814345	red
UQCRFS1	3.34E-59	0.91308771	0.236	0.062	7.54E-55	5.54E-58	52.28021098	57.25650492	black
NUDC	3.58E-59	0.75647399	0.308	0.103	8.08E-55	5.93E-58	43.29084767	57.22714626	black
PEX13	3.62E-59	0.554719249	0.481	0.209	8.18E-55	5.99E-58	31.74264097	57.2228943	black
HEATR5A	3.79E-59	0.739947556	0.344	0.126	8.57E-55	6.26E-58	42.32769616	57.20364342	black
ZFP335OS	3.83E-59	0.804976428	0.275	0.084	8.65E-55	6.31E-58	46.04478526	57.20016593	black
SDHB	5.07E-59	0.661789651	0.4	0.159	1.15E-54	8.34E-58	37.77429021	57.07899811	black
SYCP3	6.14E-59	0.853723023	0.264	0.079	1.39E-54	1.01E-57	48.65921107	56.99648453	black
CSAD	6.44E-59	0.794968118	0.265	0.078	1.46E-54	1.06E-57	45.29438876	56.97635884	black
TAGLN3	7.41E-59	0.719616047	0.358	0.134	1.68E-54	1.21E-57	40.95790272	56.91632768	black
MORF4L1	9.04E-59	0.50414381	0.73	0.399	2.04E-54	1.48E-57	28.65101849	56.83104289	black
ANKRD61	9.16E-59	1.243494311	0.132	0.012	2.07E-54	1.49E-57	70.66277864	56.82597663	red
HBEGF	1.08E-58	1.193746445	0.147	0.018	2.44E-54	1.75E-57	67.75210756	56.75586124	red
X2610035D17RIK	1.10E-58	0.63739817	0.424	0.176	2.48E-54	1.78E-57	36.17179293	56.74913204	black
MAPT	1.13E-58	0.439509578	0.933	0.699	2.55E-54	1.83E-57	24.93664192	56.7374254	black
FAU	1.14E-58	0.486359024	0.662	0.335	2.58E-54	1.85E-57	27.5926349	56.73305833	black
PTPRE	1.22E-58	0.565563769	0.558	0.268	2.76E-54	1.97E-57	32.07002916	56.70453256	black
RPS14	1.25E-58	0.544374595	0.609	0.297	2.82E-54	2.01E-57	30.86447058	56.69711786	black
X0610030E20RIK	2.05E-58	0.692128037	0.287	0.09	4.63E-54	3.29E-57	39.09288864	56.48216302	black
B230219D22RIK	2.33E-58	0.669002903	0.342	0.123	5.26E-54	3.74E-57	37.74998201	56.427232	black
SH3GL1	2.46E-58	0.712377497	0.303	0.1	5.56E-54	3.94E-57	40.18126006	56.40444879	black
CISD1	2.61E-58	0.698366461	0.361	0.136	5.90E-54	4.17E-57	39.37350593	56.37943419	black
MANF	2.75E-58	0.656425695	0.377	0.145	6.21E-54	4.39E-57	36.9948343	56.35799232	black
FYCO1	2.99E-58	0.524324138	0.477	0.205	6.76E-54	4.77E-57	29.53067923	56.32141857	black
C030029H02RIK	3.20E-58	1.644405453	0.13	0.011	7.22E-54	5.09E-57	92.56952374	56.29361274	red
SUMO2	4.00E-58	0.576121126	0.432	0.18	9.04E-54	6.35E-57	32.3762668	56.19697899	black
PSMA7	4.32E-58	0.600063436	0.401	0.159	9.76E-54	6.85E-57	33.702319	56.16459353	black
RPS9	4.40E-58	0.621957229	0.43	0.179	9.94E-54	6.96E-57	34.92737069	56.15719069	black
NDUFA5	4.73E-58	0.595256036	0.429	0.179	1.07E-53	7.47E-57	33.40960074	56.12643753	black
ZCCHC9	5.62E-58	0.722963637	0.31	0.106	1.27E-53	8.86E-57	40.52404333	56.0526716	black
SREBF2	5.90E-58	0.609720792	0.45	0.192	1.33E-53	9.28E-57	34.16408038	56.03233616	black
SYT5	6.31E-58	0.75931696	0.344	0.129	1.43E-53	9.91E-57	42.52457567	56.00372163	black
NDUFB10	6.84E-58	0.706177369	0.328	0.117	1.55E-53	1.07E-56	39.5241305	55.96912652	black
PSMB6	6.88E-58	0.75561103	0.321	0.113	1.56E-53	1.08E-56	42.28957442	55.9673863	black
MPC1	8.00E-58	0.506640889	0.625	0.312	1.81E-53	1.25E-56	28.32272995	55.90296908	black
SLC6A6	8.52E-58	0.501943696	0.598	0.289	1.93E-53	1.33E-56	28.04664029	55.87606843	black
FRMPD3	8.65E-58	0.599076442	0.564	0.282	1.96E-53	1.35E-56	33.47062141	55.87036817	black
DDX24	1.16E-57	0.52886427	0.733	0.402	2.61E-53	1.80E-56	29.48186383	55.7456147	black
PGK1	1.43E-57	0.767372047	0.306	0.105	3.24E-53	2.23E-56	42.70597325	55.6522399	black
SORL1	1.46E-57	0.563794729	0.51	0.235	3.30E-53	2.26E-56	31.37262895	55.64548111	black
GPR37	1.48E-57	1.217877861	0.141	0.017	3.35E-53	2.29E-56	67.76303024	55.64025131	red
ANP32A	1.59E-57	0.724445857	0.31	0.105	3.59E-53	2.45E-56	40.28701486	55.61080162	black
FOXN3	1.66E-57	0.461554835	0.79	0.473	3.76E-53	2.56E-56	25.65831424	55.5910421	black
TPM1	1.75E-57	0.684112078	0.325	0.114	3.96E-53	2.69E-56	38.01591074	55.56971141	black
CACYBP	1.85E-57	1.002573265	0.211	0.052	4.18E-53	2.84E-56	55.6895919	55.54665566	red
ABRAXAS2	1.88E-57	0.635703687	0.288	0.092	4.25E-53	2.88E-56	35.30724119	55.54040653	black
GUK1	2.01E-57	0.797279238	0.264	0.08	4.53E-53	3.07E-56	44.25920151	55.5127983	black
RPL30	2.06E-57	0.537491736	0.519	0.236	4.65E-53	3.14E-56	29.83223758	55.5026907	black
USP20	2.19E-57	0.562065044	0.379	0.145	4.96E-53	3.35E-56	31.18082404	55.47547278	black
IFT20	2.21E-57	0.533064041	0.553	0.26	5.00E-53	3.37E-56	29.57064518	55.47296927	black
CCDC85A	2.24E-57	-0.684544784	0.839	0.813	5.05E-53	3.40E-56	37.97088091	55.46880464	black
ZFP266	2.70E-57	0.53995905	0.46	0.198	6.09E-53	4.09E-56	29.90732551	55.38813641	black
WSCD2	2.82E-57	0.616107289	0.368	0.141	6.38E-53	4.27E-56	34.11328578	55.36906701	black
BUB3	3.88E-57	0.825286296	0.255	0.075	8.77E-53	5.87E-56	45.58181892	55.23152283	black
DTNBOS	4.78E-57	1.014367799	0.184	0.038	1.08E-52	7.22E-56	55.93361003	55.14135022	red
MGLL	4.93E-57	0.943993385	0.291	0.099	1.11E-52	7.43E-56	52.04133558	55.12891975	black
DYNLRB1	5.00E-57	0.662216717	0.32	0.112	1.13E-52	7.52E-56	36.50370389	55.12350102	black
RNF227	5.33E-57	0.580753659	0.471	0.208	1.20E-52	8.01E-56	31.99753422	55.09656931	black
HBA.A1	5.74E-57	1.154372161	0.159	0.025	1.30E-52	8.61E-56	63.56528992	55.06481538	red
NEDD8	6.37E-57	0.60658376	0.408	0.166	1.44E-52	9.54E-56	33.37464431	55.02066902	black
ACTB	7.54E-57	0.444392984	0.79	0.46	1.70E-52	1.13E-55	24.41856292	54.94812876	black
MAT2A	8.39E-57	0.479768344	0.823	0.518	1.90E-52	1.25E-55	26.34060772	54.90276303	black
NDUFC2	1.13E-56	0.548635173	0.42	0.174	2.55E-52	1.68E-55	30.05160975	54.77521532	black
GM10827	1.25E-56	1.065652711	0.178	0.035	2.82E-52	1.85E-55	58.32570056	54.73237194	red
GATM	1.43E-56	0.969146492	0.246	0.073	3.22E-52	2.12E-55	52.98727814	54.67416803	black
GM41231	1.45E-56	1.239966919	0.118	0.007	3.27E-52	2.14E-55	67.78725713	54.6686013	red
GNAO1	1.49E-56	0.490801438	0.821	0.515	3.36E-52	2.20E-55	26.82615813	54.65786374	black
RGS3	1.50E-56	1.035515684	0.203	0.048	3.39E-52	2.22E-55	56.59537082	54.65428644	red
ELOB	1.56E-56	0.562575151	0.432	0.182	3.52E-52	2.30E-55	30.73861524	54.63912722	black
PRR5L	1.56E-56	1.530942783	0.177	0.036	3.53E-52	2.30E-55	83.64899886	54.63887991	red
TMEM165	1.81E-56	0.653110323	0.363	0.138	4.08E-52	2.66E-55	35.64409837	54.57592253	black
D430042O09RIK	1.83E-56	0.591275928	0.397	0.159	4.14E-52	2.69E-55	32.26654713	54.57104811	black
CEP78	1.90E-56	0.654162366	0.343	0.124	4.30E-52	2.78E-55	35.68797511	54.55522507	black
TEX261	1.93E-56	0.888519119	0.215	0.054	4.37E-52	2.83E-55	48.46727541	54.54837649	black
PRXL2A	2.24E-56	0.745383138	0.289	0.095	5.06E-52	3.27E-55	40.61255681	54.48547834	black
YARS	3.17E-56	0.612516073	0.342	0.125	7.16E-52	4.62E-55	33.28140872	54.33556796	black
SF3B3	4.25E-56	0.543549609	0.41	0.167	9.60E-52	6.18E-55	29.46532563	54.20908251	black
TGS1	4.36E-56	0.55161106	0.426	0.177	9.85E-52	6.33E-55	29.89649324	54.19850216	black
NDUFA11	5.51E-56	0.658082167	0.369	0.145	1.25E-51	7.99E-55	35.60059144	54.09748692	black
PAK6	6.24E-56	0.913209908	0.226	0.06	1.41E-51	9.03E-55	49.35359569	54.04408698	black
NOS1AP	6.49E-56	0.515089366	0.502	0.236	1.47E-51	9.39E-55	27.82898116	54.02748146	black
OAZ1	6.81E-56	0.52594205	0.64	0.328	1.54E-51	9.83E-55	28.40483081	54.00752955	black
ZFP553	7.16E-56	1.022345737	0.163	0.028	1.62E-51	1.03E-54	55.19298873	53.98661798	red
GPATCH8	7.51E-56	0.409638521	0.953	0.757	1.70E-51	1.08E-54	22.1068103	53.9666295	black
TRAPPC2L	7.96E-56	0.720639685	0.279	0.089	1.80E-51	1.14E-54	38.87263456	53.94184553	black
SECISBP2	8.11E-56	0.64578861	0.326	0.118	1.83E-51	1.16E-54	34.83034493	53.93459157	black
KCNIP3	9.06E-56	0.857235072	0.298	0.104	2.05E-51	1.30E-54	46.19405356	53.88726506	black
SCD2	1.44E-55	0.646709024	0.636	0.343	3.25E-51	2.06E-54	34.71997932	53.68717311	black
TTYH2	1.53E-55	1.286423058	0.137	0.017	3.47E-51	2.19E-54	69.02895644	53.65960753	red
SCG3	1.54E-55	0.533886289	0.519	0.243	3.48E-51	2.19E-54	28.6480715	53.65950036	black
UGT8A	2.08E-55	1.130203521	0.199	0.048	4.71E-51	2.96E-54	60.49794655	53.52836495	red
PARK7	2.16E-55	0.656338429	0.328	0.118	4.89E-51	3.07E-54	35.12255607	53.51287462	black
GRID2	2.30E-55	-0.481800996	0.978	0.959	5.20E-51	3.26E-54	25.76994152	53.48669213	black
UBE2I	2.45E-55	0.636539961	0.304	0.105	5.54E-51	3.47E-54	34.02910493	53.45949509	black
DNAJB11	2.46E-55	0.722795919	0.26	0.079	5.57E-51	3.48E-54	38.63954546	53.4584444	black
MRPS14	2.63E-55	0.775230151	0.257	0.078	5.95E-51	3.71E-54	41.42063629	53.43011521	black
H2AFV	3.01E-55	0.944378926	0.203	0.049	6.81E-51	4.24E-54	50.40384313	53.37247765	black
PUF60	3.02E-55	0.675339472	0.311	0.11	6.82E-51	4.25E-54	36.04427505	53.37208401	black
MAFG	3.28E-55	0.53131178	0.473	0.21	7.40E-51	4.60E-54	28.33877981	53.33738282	black
FEZ1	3.33E-55	0.488436737	0.495	0.225	7.53E-51	4.67E-54	26.04862819	53.33060805	black
ECHDC1	3.40E-55	0.700271484	0.283	0.093	7.69E-51	4.76E-54	37.34003738	53.32223038	black
BC031181	3.42E-55	0.532144629	0.416	0.172	7.74E-51	4.79E-54	28.37397733	53.32004831	black
FSD1L	3.48E-55	0.513899781	0.478	0.209	7.86E-51	4.85E-54	27.39812111	53.31413264	black
NACC2	3.66E-55	0.691219784	0.305	0.107	8.28E-51	5.10E-54	36.83682117	53.2924867	black
TMEM237	4.42E-55	0.842711805	0.252	0.076	9.98E-51	6.14E-54	44.84217019	53.21175034	black
COPB1	4.48E-55	0.53427872	0.48	0.214	1.01E-50	6.22E-54	28.42693361	53.20618726	black
LMAN2L	4.88E-55	0.602010882	0.372	0.144	1.10E-50	6.76E-54	32.00880548	53.1698121	black
YWHAE	7.28E-55	0.479359208	0.679	0.361	1.65E-50	1.01E-53	25.40436446	52.99650871	black
MGAT4C	7.84E-55	-0.763383161	0.846	0.879	1.77E-50	1.08E-53	40.4328747	52.96537406	black
PLCL1	9.03E-55	0.863038385	0.615	0.363	2.04E-50	1.25E-53	45.65858237	52.90446307	black
MANBAL	1.02E-54	0.751166406	0.248	0.073	2.30E-50	1.40E-53	39.70196733	52.85375786	black
RAPGEF1	1.05E-54	0.481852829	0.521	0.24	2.37E-50	1.45E-53	25.46114977	52.84009603	black
TSC22D4	1.08E-54	0.724929703	0.266	0.083	2.43E-50	1.48E-53	38.29856814	52.8307338	black
TET3	1.37E-54	0.56698082	0.546	0.265	3.09E-50	1.88E-53	29.89499396	52.72664069	black
2-Mar	1.68E-54	0.616502087	0.455	0.205	3.80E-50	2.30E-53	32.45174817	52.63850495	black
AJAP1	1.72E-54	0.628780519	0.352	0.136	3.88E-50	2.35E-53	33.09247415	52.62961108	black
LRRC29	1.76E-54	0.784811717	0.25	0.075	3.97E-50	2.40E-53	41.29713724	52.62043919	black
MED27	2.03E-54	0.605730057	0.397	0.162	4.59E-50	2.76E-53	31.83618909	52.55837765	black
ATP5G1	2.09E-54	0.523185719	0.523	0.247	4.72E-50	2.84E-53	27.49137202	52.5461056	black
METTL16	2.16E-54	0.649175536	0.394	0.162	4.88E-50	2.93E-53	34.10318007	52.53306415	black
MRPL19	2.20E-54	0.885112457	0.177	0.036	4.98E-50	2.99E-53	46.49032662	52.52476818	black
BRINP3	2.52E-54	-0.717072389	0.868	0.866	5.70E-50	3.42E-53	37.62220626	52.46639924	black
TUBB4B	2.73E-54	0.684227875	0.353	0.137	6.18E-50	3.69E-53	35.87573775	52.4324411	black
ATP5C1	3.42E-54	0.590439329	0.425	0.181	7.73E-50	4.61E-53	30.90129923	52.3361126	black
BBS5	3.42E-54	0.634245859	0.348	0.134	7.73E-50	4.61E-53	33.19396271	52.3361126	black
RIMS2	3.55E-54	-0.399425813	0.975	0.951	8.02E-50	4.77E-53	20.89840019	52.32110566	black
RSRP1	3.62E-54	-0.483623623	0.956	0.908	8.18E-50	4.87E-53	25.29971704	52.31282314	black
DDX1	3.71E-54	0.577592532	0.353	0.134	8.40E-50	4.98E-53	30.20945183	52.30235877	black
RCN2	4.11E-54	0.590683687	0.469	0.212	9.28E-50	5.50E-53	30.86883391	52.25949964	black
NOB1	4.67E-54	0.56861114	0.335	0.124	1.06E-49	6.25E-53	29.68368921	52.20384746	black
MAGI2	5.62E-54	-0.317279088	0.998	0.993	1.27E-49	7.50E-53	16.53810195	52.12477782	black
AGPAT4	5.95E-54	0.647994612	0.344	0.132	1.35E-49	7.94E-53	33.76070587	52.10028798	black
GNAS	6.19E-54	0.447434345	0.932	0.706	1.40E-49	8.24E-53	23.30411258	52.08387071	black
SULF2	6.69E-54	0.827344574	0.245	0.074	1.51E-49	8.90E-53	43.06377652	52.05059403	black
ZSWIM7	6.86E-54	0.938128544	0.178	0.037	1.55E-49	9.11E-53	48.8206575	52.04047762	black
U2AF1	6.89E-54	0.590783916	0.419	0.178	1.56E-49	9.13E-53	30.74397872	52.03929543	black
SMC3	7.00E-54	0.544563566	0.453	0.198	1.58E-49	9.26E-53	28.33536913	52.03317099	black
JAM3	7.99E-54	0.545361427	0.425	0.182	1.81E-49	1.06E-52	28.34589407	51.97634577	black
TPRGL	9.05E-54	0.870051716	0.19	0.043	2.05E-49	1.19E-52	45.17557799	51.92286521	black
CXXC5	1.13E-53	0.749734578	0.242	0.072	2.56E-49	1.50E-52	38.85524587	51.82533528	black
PSMA5	1.23E-53	0.633112583	0.329	0.122	2.79E-49	1.62E-52	32.78883108	51.78989008	black
TTC9C	1.23E-53	0.847128028	0.215	0.057	2.79E-49	1.62E-52	43.87266743	51.78989008	black
GPM6B	1.27E-53	0.688291021	0.623	0.339	2.87E-49	1.67E-52	35.63815505	51.77774219	black
WWC1	1.36E-53	0.569884984	0.418	0.179	3.07E-49	1.78E-52	29.49132192	51.74960348	black
GAD1	1.54E-53	1.03781455	0.205	0.053	3.49E-49	2.02E-52	53.64970825	51.69488927	red
OPALIN	1.59E-53	1.063682981	0.133	0.016	3.60E-49	2.08E-52	54.97353384	51.68225383	red
COX6B1	1.70E-53	0.510225472	0.52	0.246	3.85E-49	2.22E-52	26.35490529	51.65344875	black
BTF3	1.84E-53	0.758563088	0.295	0.103	4.15E-49	2.39E-52	39.15818179	51.62152289	black
PPP2R5C	2.10E-53	0.46724096	0.697	0.377	4.74E-49	2.73E-52	24.09295976	51.56431439	black
GOT1	2.36E-53	0.580631198	0.378	0.153	5.33E-49	3.06E-52	29.91040852	51.51360905	black
P4HA1	2.64E-53	0.620929248	0.339	0.129	5.97E-49	3.43E-52	31.95626017	51.46521967	black
BTBD1	2.78E-53	0.484270067	0.541	0.255	6.29E-49	3.60E-52	24.91257954	51.44356681	black
X4930555F03RIK	3.73E-53	0.923701138	0.31	0.119	8.43E-49	4.82E-52	47.40143096	51.31684805	black
NEMF	5.98E-53	0.450274951	0.697	0.372	1.35E-48	7.72E-52	23.01466847	51.1124779	black
RBM4B	6.22E-53	0.53687075	0.458	0.203	1.41E-48	8.02E-52	27.43185443	51.09582599	black
MYCBP	6.92E-53	0.742522812	0.248	0.076	1.57E-48	8.91E-52	37.90581522	51.05003453	black
TCEAL9	7.13E-53	0.613812204	0.328	0.123	1.61E-48	9.17E-52	31.32751427	51.03762044	black
SH3BP5	7.40E-53	0.658573537	0.291	0.1	1.67E-48	9.49E-52	33.6021535	51.02262937	black
RPL37A	7.60E-53	0.463313333	0.62	0.316	1.72E-48	9.74E-52	23.63431774	51.01152082	black
TMEM60	7.63E-53	0.685881037	0.252	0.077	1.72E-48	9.76E-52	34.987169	51.01055007	black
SRP9	8.05E-53	0.668210516	0.288	0.098	1.82E-48	1.03E-51	34.07065503	50.9879061	black
TMCO1	8.80E-53	0.644235108	0.34	0.13	1.99E-48	1.12E-51	32.82350614	50.94957682	black
ARL15	9.46E-53	0.646624603	0.819	0.554	2.14E-48	1.20E-51	32.9254966	50.91902856	black
GM13830	9.62E-53	0.705903779	0.279	0.094	2.17E-48	1.22E-51	35.9391197	50.91220752	black
RBIS	9.76E-53	0.495846433	0.486	0.221	2.21E-48	1.24E-51	25.24184711	50.90658204	black
PRAF2	1.12E-52	0.703371157	0.303	0.108	2.54E-48	1.43E-51	35.76349886	50.84584223	black
PTPN1	1.20E-52	0.538654633	0.331	0.123	2.72E-48	1.52E-51	27.37293943	50.8172357	black
PXK	1.23E-52	0.531447748	0.461	0.207	2.77E-48	1.55E-51	27.00272777	50.80975104	black
ARL2	1.30E-52	0.641617284	0.282	0.095	2.94E-48	1.64E-51	32.58453142	50.78499633	black
PHB2	1.44E-52	0.632805655	0.296	0.103	3.25E-48	1.81E-51	32.1096863	50.74178152	black
ZFP397	1.52E-52	0.638778571	0.307	0.11	3.43E-48	1.91E-51	32.39778139	50.71832852	black
GPX4	1.58E-52	0.548882777	0.471	0.213	3.58E-48	1.99E-51	27.8289269	50.70103864	black
TMEM108	1.64E-52	0.563336708	0.714	0.428	3.71E-48	2.06E-51	28.55328621	50.68600326	black
FOXK1	1.65E-52	0.7852813	0.228	0.066	3.73E-48	2.07E-51	39.80170963	50.68465227	black
ARPP19	1.71E-52	0.658743076	0.3	0.107	3.86E-48	2.14E-51	33.3780867	50.66935489	black
DYNLT1B	2.03E-52	0.923245499	0.176	0.037	4.58E-48	2.53E-51	46.71281495	50.59630942	black
EIF4A1	2.10E-52	0.548012786	0.418	0.177	4.75E-48	2.63E-51	27.71888825	50.58073271	black
SERF2	2.11E-52	0.588329908	0.387	0.16	4.76E-48	2.63E-51	29.7581578	50.58073271	black
IGSF3	2.67E-52	0.648061159	0.354	0.141	6.04E-48	3.33E-51	32.71296062	50.47819975	black
CLTB	2.98E-52	0.46414177	0.53	0.25	6.73E-48	3.70E-51	23.40768073	50.43217884	black
PSMC5	2.98E-52	0.564127776	0.359	0.142	6.73E-48	3.70E-51	28.4501929	50.43217884	black
BEX3	3.24E-52	0.438201363	0.443	0.193	7.33E-48	4.02E-51	22.08340006	50.39555304	black
WBP2	3.45E-52	0.59850713	0.35	0.136	7.79E-48	4.27E-51	30.14658145	50.36962792	black
AGBL4	3.50E-52	-0.444876279	0.956	0.927	7.91E-48	4.32E-51	22.40578601	50.36408342	black
RBX1	3.50E-52	0.53973477	0.463	0.209	7.92E-48	4.32E-51	27.18324696	50.36408342	black
TMEM50A	3.54E-52	0.608145413	0.385	0.16	8.01E-48	4.37E-51	30.62590566	50.35951108	black
CRTC3	3.99E-52	0.490537824	0.549	0.269	9.03E-48	4.92E-51	24.67804628	50.30814157	black
STXBP3	4.42E-52	0.827715107	0.203	0.051	9.98E-48	5.43E-51	41.60518139	50.26509848	black
PSIP1	4.80E-52	0.472405809	0.638	0.332	1.09E-47	5.90E-51	23.72854239	50.22915036	black
GPKOW	5.12E-52	0.773965279	0.223	0.063	1.16E-47	6.28E-51	38.8546453	50.20205217	black
RTF1	5.16E-52	0.421092666	0.587	0.289	1.17E-47	6.32E-51	21.13863948	50.19949565	black
ATP1A1	6.32E-52	0.519764333	0.471	0.213	1.43E-47	7.73E-51	26.04636666	50.11187762	black
CALB2	6.33E-52	0.670793208	0.281	0.096	1.43E-47	7.73E-51	33.61470716	50.11187762	black
AKAP8	6.61E-52	0.472028539	0.593	0.298	1.49E-47	8.06E-51	23.64563759	50.09366099	black
HEPACAM	6.72E-52	1.301577528	0.144	0.023	1.52E-47	8.19E-51	65.19185942	50.08680467	red
ADIPOR2	7.86E-52	0.914686293	0.328	0.132	1.78E-47	9.55E-51	45.7524005	50.01977276	black
TELO2	8.04E-52	0.587172196	0.275	0.091	1.82E-47	9.77E-51	29.36465288	50.01029187	black
ARPC3	8.23E-52	0.797483045	0.221	0.062	1.86E-47	9.98E-51	39.87476679	50.00077062	black
X2310058D17RIK	8.38E-52	0.930854962	0.149	0.025	1.89E-47	1.01E-50	46.53692197	49.99374109	black
XNDC1	9.40E-52	0.661106341	0.262	0.084	2.13E-47	1.14E-50	33.01833637	49.94406243	black
X5330438D12RIK	1.03E-51	0.698972025	0.278	0.095	2.32E-47	1.24E-50	34.88275026	49.90578878	black
AY036118	1.34E-51	0.68190373	0.297	0.106	3.04E-47	1.62E-50	33.95236357	49.79055267	black
SLC2A8	1.49E-51	0.665952235	0.287	0.099	3.36E-47	1.79E-50	33.1293788	49.74737988	black
KRIT1	1.68E-51	0.440424473	0.851	0.557	3.81E-47	2.03E-50	21.88624876	49.69353455	black
VDAC2	2.09E-51	0.559226264	0.395	0.166	4.72E-47	2.51E-50	27.73785604	49.60041729	black
COX7A2L	2.21E-51	0.594810552	0.307	0.111	5.00E-47	2.65E-50	29.48845123	49.57620732	black
TM2D2	2.29E-51	0.796749207	0.232	0.069	5.19E-47	2.75E-50	39.48764371	49.56094508	black
GM32509	2.32E-51	0.584053156	0.414	0.184	5.25E-47	2.78E-50	28.94357176	49.55639986	black
TIGD2	3.27E-51	0.610992699	0.311	0.114	7.38E-47	3.90E-50	30.18832599	49.40865254	black
NDUFA2	3.41E-51	0.5889787	0.382	0.159	7.70E-47	4.06E-50	29.09032198	49.39112735	black
SLC38A9	3.44E-51	0.466385283	0.613	0.32	7.78E-47	4.10E-50	23.03354929	49.38738452	black
SMDT1	4.13E-51	0.697915066	0.306	0.113	9.34E-47	4.91E-50	34.41312934	49.30847753	black
SMS	4.49E-51	0.450366508	0.59	0.298	1.02E-46	5.34E-50	22.19065609	49.27243859	black
ELOVL5	5.74E-51	0.700695379	0.291	0.103	1.30E-46	6.81E-50	34.45084023	49.16664399	black
HAPLN2	5.88E-51	1.184405941	0.17	0.037	1.33E-46	6.97E-50	58.22143591	49.15665644	red
TMBIM4	6.92E-51	0.634812284	0.327	0.125	1.56E-46	8.19E-50	31.1607904	49.08662165	black
WDFY1	7.11E-51	0.549614724	0.384	0.159	1.61E-46	8.40E-50	26.97274717	49.07573612	black
ACTR10	7.47E-51	0.531654083	0.381	0.158	1.69E-46	8.82E-50	26.0799874	49.05442883	black
TOMM20	9.78E-51	0.533722568	0.435	0.193	2.21E-46	1.15E-49	26.11954984	48.93843999	black
USO1	1.07E-50	0.497809212	0.441	0.193	2.43E-46	1.26E-49	24.34215984	48.89857247	black
GABARAP	1.14E-50	0.637972111	0.285	0.1	2.57E-46	1.33E-49	31.18060019	48.87455054	black
UPP2	1.19E-50	-0.591371187	0.871	0.83	2.68E-46	1.39E-49	28.89192262	48.85581725	black
CDH22	1.21E-50	0.757743349	0.248	0.079	2.74E-46	1.42E-49	37.01399355	48.84766539	black
MTMR1	1.43E-50	0.527702042	0.417	0.182	3.24E-46	1.67E-49	25.73921647	48.77604106	black
SNX3	1.43E-50	0.553697781	0.379	0.156	3.24E-46	1.67E-49	27.00718568	48.77604106	black
ABHD6	1.43E-50	0.516400344	0.434	0.193	3.24E-46	1.67E-49	25.18796439	48.77604106	black
INSIG2	1.45E-50	0.556386234	0.386	0.161	3.28E-46	1.69E-49	27.13557006	48.77110253	black
NEAT1	1.50E-50	1.207602061	0.209	0.06	3.38E-46	1.74E-49	58.88088407	48.75851573	red
EIF2B3	1.67E-50	0.578711767	0.332	0.127	3.78E-46	1.94E-49	28.18981174	48.71131598	black
MAP1LC3B	1.73E-50	0.740061655	0.248	0.079	3.91E-46	2.01E-49	36.03886621	48.69711321	black
NDUFC1	1.75E-50	0.665480666	0.289	0.103	3.97E-46	2.04E-49	32.40309964	48.69127131	black
PTPRN2	2.29E-50	0.330803742	0.976	0.88	5.17E-46	2.65E-49	16.06940814	48.57686332	black
NKIRAS1	2.39E-50	0.567766366	0.357	0.144	5.39E-46	2.76E-49	27.57010921	48.5588983	black
PDZD2	2.55E-50	0.794447626	0.383	0.173	5.76E-46	2.95E-49	38.55517543	48.5307957	black
PIM2	2.69E-50	0.659290063	0.275	0.095	6.08E-46	3.10E-49	31.98100372	48.5082447	black
KDM5D	2.96E-50	0.481986451	0.473	0.216	6.69E-46	3.41E-49	23.36055476	48.46724365	black
UQCRH	2.99E-50	0.505409951	0.47	0.215	6.76E-46	3.44E-49	24.49373572	48.46310537	black
MRPL21	3.08E-50	0.545660776	0.303	0.11	6.97E-46	3.54E-49	26.43764101	48.45068986	black
TXN1	3.88E-50	0.845531573	0.212	0.059	8.77E-46	4.46E-49	40.88235925	48.3510735	black
ZCCHC14	4.11E-50	0.558433904	0.416	0.181	9.30E-46	4.72E-49	26.98712342	48.32644157	black
PRDX1	5.00E-50	0.675323224	0.279	0.098	1.13E-45	5.72E-49	32.57921699	48.24240579	black
TNFAIP8	5.80E-50	-1.835285084	0.019	0.123	1.31E-45	6.63E-49	88.42139489	48.17856129	blue
NAV3	6.06E-50	-0.410735218	0.976	0.951	1.37E-45	6.92E-49	19.78083595	48.15958086	black
ZFP182	7.70E-50	0.51406621	0.396	0.168	1.74E-45	8.78E-49	24.70413201	48.05632333	black
PSMB1	8.62E-50	0.545049938	0.377	0.157	1.95E-45	9.82E-49	26.16674181	48.00797138	black
GJC3	9.89E-50	1.305912394	0.135	0.021	2.24E-45	1.13E-48	62.61684077	47.94873	red
ARL3	9.97E-50	0.462436102	0.631	0.334	2.25E-45	1.13E-48	22.17196409	47.94600592	black
LGMN	1.05E-49	0.522127645	0.479	0.223	2.37E-45	1.19E-48	25.02293209	47.92493239	black
CADPS	1.08E-49	-0.395295565	0.978	0.956	2.43E-45	1.22E-48	18.93999892	47.91351226	black
RABAC1	1.09E-49	0.42223219	0.797	0.48	2.47E-45	1.24E-48	20.22816318	47.90767657	black
RAB6B	1.17E-49	0.437540278	0.533	0.255	2.66E-45	1.33E-48	20.94801171	47.87676193	black
CBX1	1.41E-49	0.554997923	0.397	0.169	3.19E-45	1.59E-48	26.52788976	47.79817848	black
C78859	1.41E-49	0.526702078	0.438	0.2	3.19E-45	1.59E-48	25.17539995	47.79817848	black
EXOSC10	1.46E-49	0.548916545	0.299	0.107	3.30E-45	1.64E-48	26.22944067	47.78402273	black
PDCD6	1.50E-49	0.805582099	0.198	0.052	3.40E-45	1.69E-48	38.48414529	47.77184765	black
GLE1	1.56E-49	0.492505807	0.387	0.161	3.52E-45	1.75E-48	23.52049233	47.7567817	black
H2AFY	1.59E-49	0.572066398	0.362	0.148	3.59E-45	1.78E-48	27.31582224	47.74939122	black
EMC7	1.87E-49	0.54428515	0.432	0.194	4.23E-45	2.10E-48	25.95080434	47.67869254	black
COQ5	1.87E-49	0.487437946	0.36	0.145	4.23E-45	2.10E-48	23.24032995	47.67854068	black
KTN1	2.05E-49	0.417452	0.836	0.545	4.63E-45	2.29E-48	19.88738547	47.63993337	black
ATG16L2	2.23E-49	0.535017825	0.38	0.159	5.05E-45	2.49E-48	25.46873104	47.6035187	black
GAREM1	2.28E-49	0.564887513	0.418	0.188	5.15E-45	2.54E-48	26.88576932	47.59490818	black
ITFG2	2.78E-49	0.536488153	0.343	0.136	6.29E-45	3.10E-48	25.48783007	47.50865409	black
VPS72	3.22E-49	0.744067327	0.205	0.056	7.28E-45	3.58E-48	35.30294708	47.44590418	black
NAALADL2	4.98E-49	-0.63039827	0.847	0.818	1.13E-44	5.54E-48	29.79062905	47.25683819	black
HMGCR	5.06E-49	0.652846706	0.287	0.103	1.14E-44	5.61E-48	30.84746404	47.25070028	black
TBL3	5.13E-49	0.666984839	0.264	0.09	1.16E-44	5.68E-48	31.51224129	47.2458135	black
TM2D1	5.45E-49	0.525902304	0.378	0.159	1.23E-44	6.03E-48	24.8331201	47.22002532	black
ZFP398	6.32E-49	0.462985846	0.654	0.35	1.43E-44	6.98E-48	21.83257864	47.15603908	black
COG4	6.53E-49	0.508781668	0.38	0.158	1.48E-44	7.20E-48	23.98527556	47.14257029	black
TEK	7.10E-49	1.117271296	0.101	0.006	1.60E-44	7.82E-48	52.63099523	47.10672818	red
CMIP	7.18E-49	0.415416187	0.803	0.512	1.62E-44	7.90E-48	19.56711546	47.1024386	black
GPS2	7.73E-49	0.530531792	0.318	0.12	1.75E-44	8.50E-48	24.97237684	47.07046252	black
CTNNBL1	8.47E-49	0.503015843	0.456	0.213	1.91E-44	9.30E-48	23.65756896	47.03145889	black
MACROD1	8.65E-49	0.678979912	0.265	0.091	1.95E-44	9.48E-48	31.92777353	47.02314894	black
MYNN	9.46E-49	0.650336628	0.251	0.082	2.14E-44	1.04E-47	30.55570187	46.98443939	black
SNHG20	9.93E-49	-1.020566701	0.527	0.563	2.24E-44	1.09E-47	47.92993108	46.96403579	blue
RCAN3	1.16E-48	0.740126162	0.23	0.071	2.61E-44	1.26E-47	34.7108912	46.89861403	black
RTCA	1.18E-48	0.516030435	0.345	0.137	2.67E-44	1.29E-47	24.19655858	46.88978969	black
FABP5	1.23E-48	0.674162314	0.223	0.066	2.79E-44	1.34E-47	31.59925171	46.871875	black
HSPE1	1.39E-48	0.665977532	0.274	0.096	3.14E-44	1.51E-47	31.18140179	46.82050111	black
EEF1G	1.64E-48	0.435272605	0.525	0.252	3.71E-44	1.78E-47	20.3484985	46.74886095	black
OSTC	1.69E-48	0.691418786	0.278	0.099	3.82E-44	1.83E-47	32.31475332	46.73687491	black
SLC25A23	1.72E-48	0.489610543	0.671	0.37	3.89E-44	1.87E-47	22.87889371	46.72876036	black
PARP2	1.79E-48	0.670256056	0.236	0.074	4.05E-44	1.94E-47	31.30932163	46.71247852	black
RRNAD1	1.89E-48	0.461279657	0.47	0.22	4.26E-44	2.04E-47	21.5372526	46.69022858	black
RTN4	1.97E-48	0.434797968	0.888	0.62	4.44E-44	2.12E-47	20.29321125	46.6727371	black
SETD4	2.02E-48	0.522722926	0.331	0.13	4.56E-44	2.18E-47	24.39111567	46.66165281	black
CNBP	2.24E-48	0.520157067	0.343	0.136	5.07E-44	2.42E-47	24.24817898	46.61703271	black
CNOT8	2.31E-48	0.741457286	0.208	0.059	5.21E-44	2.48E-47	34.55572657	46.605148	black
PPME1	2.40E-48	0.507465332	0.46	0.214	5.43E-44	2.58E-47	23.6416259	46.58766704	black
EIF4H	2.41E-48	0.533806053	0.38	0.16	5.44E-44	2.59E-47	24.8685627	46.58726251	black
RNF6	2.57E-48	0.856035024	0.185	0.046	5.81E-44	2.76E-47	39.85665798	46.55961132	black
S100B	2.70E-48	0.89495641	0.181	0.045	6.11E-44	2.90E-47	41.64964145	46.53817881	black
DUSP12	2.86E-48	0.672246659	0.24	0.077	6.46E-44	3.06E-47	31.26923565	46.51452743	black
FLRT1	2.98E-48	0.650141503	0.289	0.106	6.75E-44	3.19E-47	30.22912045	46.49621707	black
HDAC1	3.43E-48	0.67737102	0.258	0.086	7.74E-44	3.66E-47	31.4550005	46.43688552	black
A330023F24RIK	3.67E-48	-0.603899272	0.834	0.782	8.29E-44	3.91E-47	28.02553166	46.40762614	black
AKAP9	3.73E-48	0.390867861	0.852	0.537	8.43E-44	3.97E-47	18.13660461	46.4008593	black
PEG3	3.84E-48	-0.650588276	0.829	0.772	8.68E-44	4.08E-47	30.18011777	46.38896654	black
UGDH	3.86E-48	0.489849439	0.392	0.168	8.73E-44	4.10E-47	22.72251045	46.38672344	black
SST	3.95E-48	0.598456969	0.318	0.13	8.94E-44	4.20E-47	27.75479682	46.37726394	black
FAM220A.1	4.31E-48	0.771456139	0.174	0.041	9.75E-44	4.57E-47	35.74925867	46.33997563	black
NNAT	4.66E-48	1.017055414	0.263	0.095	1.05E-43	4.93E-47	47.09678983	46.30700471	red
MAP1B	4.75E-48	0.36667898	0.959	0.787	1.07E-43	5.02E-47	16.97701165	46.29938606	black
HK1	4.92E-48	0.463882348	0.452	0.208	1.11E-43	5.20E-47	21.47049979	46.2843647	black
VSTM5	5.03E-48	0.605257136	0.289	0.105	1.14E-43	5.31E-47	28.00833993	46.27510898	black
GPRC5B	5.63E-48	0.737509395	0.265	0.093	1.27E-43	5.93E-47	34.09292736	46.22710923	black
SETD7	5.94E-48	0.4541535	0.443	0.201	1.34E-43	6.25E-47	20.98388857	46.20439692	black
TNRC6A	6.45E-48	-0.572151079	0.862	0.803	1.46E-43	6.78E-47	26.4156674	46.16904232	black
EIF3K	6.55E-48	0.63639954	0.295	0.109	1.48E-43	6.87E-47	29.37795571	46.16275444	black
RPL32	6.67E-48	0.485719233	0.482	0.226	1.51E-43	6.99E-47	22.41852183	46.15531009	black
FXN	7.41E-48	1.001178184	0.146	0.027	1.68E-43	7.76E-47	46.16428523	46.10995924	red
NDUFB1.PS	8.18E-48	0.483727063	0.46	0.211	1.85E-43	8.55E-47	22.28423968	46.06779609	black
UBE2S	8.33E-48	0.615562338	0.316	0.121	1.88E-43	8.71E-47	28.3528795	46.06012706	black
NDUFAB1	1.01E-47	0.6194912	0.308	0.119	2.28E-43	1.05E-46	28.48314204	45.9782835	black
TAF6	1.01E-47	0.545671781	0.297	0.109	2.28E-43	1.05E-46	25.0887612	45.97775089	black
VAMP4	1.22E-47	0.434304557	0.528	0.256	2.76E-43	1.27E-46	19.93298191	45.89632222	black
MOCS2	1.54E-47	0.717999627	0.213	0.063	3.47E-43	1.60E-46	32.88207616	45.79678723	black
BCAS1	1.69E-47	1.248241126	0.134	0.022	3.81E-43	1.75E-46	57.11522813	45.75656654	red
DDX23	2.22E-47	0.774848724	0.187	0.048	5.02E-43	2.30E-46	35.36235272	45.6377505	black
SLC4A10	2.26E-47	-0.656679795	0.77	0.735	5.10E-43	2.34E-46	29.96494248	45.63097982	black
TRAM1L1	2.38E-47	0.66005646	0.252	0.084	5.38E-43	2.46E-46	30.10397843	45.60818696	black
ATP6V1G1	2.40E-47	0.697067484	0.25	0.085	5.42E-43	2.48E-46	31.79032012	45.60579982	black
SMIM7	2.45E-47	0.847778129	0.182	0.046	5.54E-43	2.53E-46	38.65618552	45.59705446	black
DNAJA1	2.56E-47	0.485453239	0.467	0.218	5.78E-43	2.64E-46	22.12641121	45.57887236	black
FCF1	2.61E-47	0.688211782	0.219	0.066	5.90E-43	2.69E-46	31.36218338	45.57054123	black
NDFIP2	2.86E-47	0.455610932	0.55	0.275	6.47E-43	2.94E-46	20.74442424	45.53100637	black
WIPF3	3.12E-47	0.927653295	0.252	0.089	7.06E-43	3.21E-46	42.20236454	45.49368257	black
IFFO1	3.62E-47	0.523681951	0.284	0.104	8.18E-43	3.71E-46	23.79101837	45.4302814	black
ITPA	3.74E-47	0.608750504	0.262	0.09	8.46E-43	3.84E-46	27.64706225	45.4160811	black
NCAPD3	3.82E-47	0.517535717	0.403	0.18	8.64E-43	3.92E-46	23.49985377	45.40721155	black
PTPRA	4.04E-47	0.453077575	0.604	0.315	9.12E-43	4.13E-46	20.56255507	45.3841819	black
PHF20	4.25E-47	0.472557973	0.465	0.218	9.60E-43	4.34E-46	21.43654487	45.36278321	black
MAML3	5.23E-47	0.647974059	0.508	0.272	1.18E-42	5.34E-46	29.33532851	45.27238106	black
EFCAB14	5.54E-47	0.472027204	0.415	0.185	1.25E-42	5.65E-46	21.35823834	45.24789709	black
TECPR1	5.63E-47	0.425186155	0.498	0.24	1.27E-42	5.73E-46	19.23627475	45.24200639	black
ATP2B3	5.87E-47	0.432579311	0.5	0.242	1.33E-42	5.97E-46	19.56311732	45.22434808	black
GFPT1	6.33E-47	0.522006976	0.396	0.174	1.43E-42	6.43E-46	23.59050475	45.19193386	black
MRPL42	6.69E-47	0.57773833	0.265	0.092	1.51E-42	6.79E-46	26.09544153	45.16827115	black
KLF13	7.43E-47	0.626189708	0.293	0.111	1.68E-42	7.53E-46	28.25562194	45.12310181	black
PIAS4	7.44E-47	0.521650311	0.298	0.112	1.68E-42	7.53E-46	23.53848008	45.12310181	black
DLGAP4	8.74E-47	0.438343848	0.592	0.31	1.98E-42	8.84E-46	19.74891865	45.0534865	black
IL33	8.83E-47	1.133386117	0.11	0.011	2.00E-42	8.92E-46	51.05876744	45.04975549	red
PEA15A	9.32E-47	0.566667641	0.318	0.124	2.11E-42	9.40E-46	25.51525286	45.02683936	black
MRPL47	9.42E-47	0.74837796	0.211	0.062	2.13E-42	9.49E-46	33.69396811	45.02266224	black
MIA3	9.49E-47	0.446479888	0.545	0.275	2.15E-42	9.55E-46	20.1005688	45.02009913	black
TRUB2	9.50E-47	0.610201782	0.245	0.081	2.15E-42	9.55E-46	27.47134471	45.02009913	black
LRRC58	9.64E-47	0.503176852	0.393	0.171	2.18E-42	9.68E-46	22.65009213	45.01417752	black
FBXO28	1.02E-46	0.548774668	0.297	0.112	2.32E-42	1.03E-45	24.68828604	44.98802055	black
RPLP0	1.05E-46	0.626819743	0.278	0.102	2.38E-42	1.05E-45	28.19262085	44.9772381	black
PEX14	1.06E-46	0.469210244	0.429	0.195	2.39E-42	1.06E-45	21.1033544	44.97632924	black
CDH8	1.06E-46	-0.892792232	0.638	0.698	2.41E-42	1.06E-45	40.15158728	44.97304729	black
SMIM10L1	1.07E-46	0.439381086	0.402	0.175	2.41E-42	1.07E-45	19.76002631	44.97240988	black
DDX18	1.09E-46	0.59567826	0.271	0.097	2.46E-42	1.09E-45	26.78385597	44.9636285	black
ACTR1A	1.18E-46	0.523112364	0.39	0.171	2.66E-42	1.17E-45	23.5038849	44.93085335	black
EIF3H	1.22E-46	0.526299146	0.32	0.125	2.77E-42	1.22E-45	23.63828221	44.9141565	black
FAIM	1.36E-46	0.709186182	0.206	0.059	3.08E-42	1.35E-45	31.8198438	44.86811025	black
AP1S1	1.45E-46	0.597199781	0.268	0.095	3.28E-42	1.44E-45	26.77946072	44.84171223	black
ZFHX3	1.74E-46	0.562971416	0.788	0.598	3.94E-42	1.73E-45	25.19960786	44.7617892	black
CNTN2	1.83E-46	0.50794654	0.419	0.191	4.15E-42	1.82E-45	22.7258796	44.74069183	black
NGDN	1.90E-46	0.550850843	0.26	0.089	4.30E-42	1.88E-45	24.63701573	44.72538449	black
DSCAML1	1.91E-46	0.501149912	0.652	0.401	4.33E-42	1.89E-45	22.41302302	44.72319061	black
MXI1	2.01E-46	0.726204952	0.241	0.081	4.53E-42	1.98E-45	32.46379659	44.70335338	black
TMOD1	2.10E-46	1.04988489	0.14	0.025	4.75E-42	2.07E-45	46.91207122	44.68306161	red
GNA12	2.14E-46	0.708609649	0.232	0.075	4.85E-42	2.11E-45	31.65725625	44.67516962	black
PGRMC1	2.19E-46	0.46844559	0.657	0.373	4.94E-42	2.15E-45	20.92413054	44.66715234	black
GM16638	2.25E-46	0.80317568	0.165	0.038	5.08E-42	2.21E-45	35.86633338	44.65565162	black
GIN1	2.56E-46	0.705969619	0.223	0.07	5.79E-42	2.51E-45	31.48593403	44.59955948	black
RPL22L1	2.70E-46	0.480641902	0.473	0.225	6.10E-42	2.65E-45	21.42576055	44.57738801	black
ANKRA2	2.88E-46	0.652216034	0.24	0.079	6.51E-42	2.82E-45	29.05595636	44.54958917	black
SPIRE1	3.01E-46	0.431669227	0.707	0.404	6.81E-42	2.95E-45	19.22245243	44.53051365	black
TMBIM1	3.59E-46	1.075588117	0.158	0.035	8.11E-42	3.51E-45	47.8155067	44.45522033	red
CLCN4	3.63E-46	0.505706424	0.412	0.184	8.20E-42	3.54E-45	22.47892105	44.45053487	black
LRP8	5.04E-46	0.463310232	0.395	0.173	1.14E-41	4.92E-45	20.52856265	44.30845947	black
PREB	5.16E-46	0.360268468	0.426	0.188	1.17E-41	5.03E-45	15.95943026	44.29871519	black
PPA1	5.25E-46	0.653747237	0.255	0.09	1.19E-41	5.11E-45	28.95574529	44.29195819	black
DLD	5.58E-46	0.568924614	0.334	0.136	1.26E-41	5.42E-45	25.1839933	44.26595843	black
ZBTB38	6.13E-46	0.418500033	0.604	0.318	1.39E-41	5.96E-45	18.50815904	44.22498822	black
EIF5	6.60E-46	0.473909328	0.469	0.224	1.49E-41	6.40E-45	20.94373617	44.19355126	black
SNRPB	6.70E-46	0.548294067	0.333	0.136	1.52E-41	6.49E-45	24.22772997	44.18747428	black
M6PR	7.61E-46	0.613846805	0.277	0.101	1.72E-41	7.36E-45	27.09090376	44.13300444	black
ERLEC1	7.84E-46	0.404172106	0.483	0.228	1.77E-41	7.58E-45	17.8321866	44.12028026	black
MORN2	8.23E-46	0.59855513	0.262	0.092	1.86E-41	7.95E-45	26.3961563	44.0997913	black
STX16	8.97E-46	0.432460065	0.667	0.367	2.03E-41	8.65E-45	19.05548951	44.06300384	black
ATL1	9.20E-46	0.421865633	0.66	0.357	2.08E-41	8.86E-45	18.58420693	44.05243157	black
ARL6IP5	9.23E-46	0.68550786	0.225	0.071	2.09E-41	8.89E-45	30.19740821	44.051148	black
HYAL1	9.35E-46	0.90376782	0.134	0.023	2.11E-41	8.99E-45	39.80766907	44.04634488	black
AFG3L1	1.11E-45	0.433220689	0.42	0.189	2.52E-41	1.07E-44	19.04884658	43.9703067	black
FAM53B	1.21E-45	1.004859709	0.121	0.017	2.74E-41	1.16E-44	44.14772586	43.93421833	red
ATP5E	1.23E-45	0.587509407	0.308	0.121	2.78E-41	1.18E-44	25.80865573	43.92892335	black
QTRT1	1.29E-45	0.496858387	0.345	0.142	2.91E-41	1.23E-44	21.81688509	43.90966451	black
RPL5	1.42E-45	0.544441572	0.403	0.183	3.20E-41	1.36E-44	23.88354739	43.86797154	black
NDST4	1.47E-45	0.713141472	0.467	0.252	3.32E-41	1.40E-44	31.27327711	43.85283754	black
LANCL1	1.55E-45	0.422649945	0.53	0.262	3.50E-41	1.48E-44	18.52511298	43.8308657	black
MYO1C	1.60E-45	0.730769827	0.209	0.062	3.62E-41	1.53E-44	32.01971021	43.81640979	black
SLU7	1.84E-45	0.871918727	0.155	0.034	4.15E-41	1.75E-44	38.15309994	43.75763334	black
SEC14L1	1.98E-45	0.644284083	0.274	0.101	4.48E-41	1.88E-44	28.17129023	43.72495142	black
GNL3	2.02E-45	0.514926968	0.393	0.172	4.56E-41	1.92E-44	22.5113259	43.71751199	black
NARF	2.12E-45	0.556065549	0.335	0.139	4.78E-41	2.01E-44	24.29848956	43.69716775	black
RNF34	2.31E-45	0.515790549	0.329	0.132	5.22E-41	2.19E-44	22.51928391	43.65974516	black
PPM1D	2.37E-45	0.652339498	0.237	0.079	5.35E-41	2.24E-44	28.47408967	43.64918846	black
GM40841	2.74E-45	-0.756893045	0.712	0.7	6.20E-41	2.59E-44	32.9901135	43.58622889	black
PPIL2	2.80E-45	0.475423456	0.377	0.162	6.33E-41	2.65E-44	20.71770261	43.57736742	black
GART	2.84E-45	0.58891181	0.266	0.095	6.42E-41	2.68E-44	25.65985674	43.57164573	black
ST3GAL5	3.08E-45	0.430470886	0.444	0.205	6.95E-41	2.90E-44	18.74168437	43.53763512	black
D330023K18RIK	3.50E-45	0.57678149	0.272	0.1	7.90E-41	3.29E-44	25.07981011	43.48234216	black
LRP11	3.51E-45	0.441428119	0.39	0.169	7.93E-41	3.30E-44	19.19377779	43.4810946	black
UQCC2	3.64E-45	0.576589235	0.261	0.093	8.23E-41	3.42E-44	25.06198446	43.46592501	black
ATP5MPL	4.24E-45	0.511434495	0.414	0.186	9.58E-41	3.98E-44	22.19634368	43.40016932	black
PPP1R11	4.24E-45	0.611940939	0.253	0.087	9.59E-41	3.98E-44	26.55834036	43.40016932	black
ST3GAL3	4.82E-45	0.412547608	0.569	0.293	1.09E-40	4.52E-44	17.88182701	43.34488109	black
CCT5	5.24E-45	0.746767898	0.22	0.07	1.18E-40	4.91E-44	32.34202205	43.30933634	black
CEP57L1	5.60E-45	0.677856339	0.235	0.079	1.27E-40	5.24E-44	29.33819658	43.28084714	black
PFDN5	6.41E-45	0.506545272	0.364	0.156	1.45E-40	5.99E-44	21.89414897	43.22249198	black
RPL18A	7.61E-45	0.364591307	0.538	0.266	1.72E-40	7.10E-44	15.73155988	43.14847773	black
DNTTIP1	7.68E-45	0.568811775	0.279	0.104	1.73E-40	7.15E-44	24.54165173	43.14547065	black
MAN1A2	7.70E-45	0.394915046	0.595	0.313	1.74E-40	7.17E-44	17.03851459	43.14475925	black
ZADH2	7.90E-45	0.790259967	0.183	0.049	1.79E-40	7.35E-44	34.08687502	43.13374894	black
MRPS33	8.08E-45	0.605548212	0.25	0.087	1.83E-40	7.51E-44	26.11382327	43.12426778	black
NDUFB3	8.66E-45	0.535947267	0.341	0.141	1.96E-40	8.03E-44	23.09680059	43.09528571	black
GM29536	8.66E-45	0.860150045	0.147	0.03	1.96E-40	8.03E-44	37.06841195	43.09528571	black
CDK19	9.17E-45	0.660069994	0.333	0.143	2.07E-40	8.49E-44	28.42977498	43.07084892	black
X6430548M08RIK	9.90E-45	0.555731621	0.267	0.096	2.24E-40	9.16E-44	23.91764388	43.03811946	black
NDUFB7	1.01E-44	0.579950978	0.261	0.094	2.29E-40	9.38E-44	24.95400246	43.02777891	black
CD63	1.09E-44	0.646381484	0.236	0.08	2.47E-40	1.01E-43	27.79244675	42.99697231	black
DCTN3	1.10E-44	0.708673977	0.22	0.07	2.48E-40	1.01E-43	30.46931695	42.99482969	black
NDUFA13	1.12E-44	0.422037323	0.606	0.32	2.52E-40	1.03E-43	18.14244091	42.98776415	black
PPP1R2	1.30E-44	0.436663127	0.465	0.223	2.95E-40	1.20E-43	18.74207087	42.92112086	black
XBP1	1.34E-44	0.620134604	0.241	0.082	3.02E-40	1.23E-43	26.61038835	42.91066514	black
MED21	1.35E-44	0.844048192	0.174	0.045	3.05E-40	1.24E-43	36.2157624	42.90722109	black
LRRC59	1.44E-44	0.80665783	0.172	0.044	3.25E-40	1.32E-43	34.58888679	42.87925501	black
TLN2	1.51E-44	0.41848655	0.615	0.331	3.42E-40	1.39E-43	17.93546935	42.85793493	black
PSMB2	1.55E-44	0.402493189	0.525	0.261	3.50E-40	1.42E-43	17.24605031	42.84805504	black
BCL2L1	1.63E-44	0.488568815	0.36	0.155	3.69E-40	1.49E-43	20.92365814	42.82642993	black
FAF2	1.92E-44	0.468620719	0.458	0.219	4.34E-40	1.76E-43	20.0361078	42.75548855	black
TRAPPC4	2.11E-44	0.710961811	0.223	0.072	4.77E-40	1.93E-43	30.36867784	42.71492135	black
LMO7	2.13E-44	1.154940075	0.144	0.03	4.80E-40	1.94E-43	49.33061678	42.7127068	red
SLC4A4	2.27E-44	0.610899119	0.282	0.11	5.13E-40	2.07E-43	26.0759989	42.68462355	black
TMEM175	2.67E-44	0.402819209	0.486	0.237	6.03E-40	2.43E-43	17.16610285	42.61490629	black
GM28905	3.06E-44	0.527546813	0.55	0.317	6.91E-40	2.78E-43	22.45050231	42.5564173	black
RNPS1	3.33E-44	0.388774047	0.469	0.222	7.53E-40	3.02E-43	16.53043945	42.51940065	black
PLPBP	3.63E-44	0.50936072	0.287	0.11	8.20E-40	3.29E-43	21.63905653	42.48277436	black
CAMK2N2	4.18E-44	0.49824672	0.329	0.134	9.45E-40	3.79E-43	21.13648377	42.42172189	black
MPPED2	4.25E-44	0.55058246	0.624	0.373	9.60E-40	3.85E-43	23.35295546	42.41500076	black
KCNJ9	4.37E-44	0.558007864	0.28	0.106	9.88E-40	3.95E-43	23.66125296	42.40308156	black
VDAC1	4.79E-44	0.48912988	0.418	0.193	1.08E-39	4.33E-43	20.72133683	42.36367001	black
PARM1	5.24E-44	0.554077382	0.351	0.155	1.18E-39	4.73E-43	23.45139635	42.3251284	black
POLR3E	5.51E-44	0.572571751	0.268	0.098	1.25E-39	4.97E-43	24.2219601	42.30379874	black
PRDX4	5.62E-44	0.816236609	0.174	0.045	1.27E-39	5.06E-43	34.52353513	42.29598959	black
MYO1D	5.70E-44	0.587341238	0.3	0.12	1.29E-39	5.13E-43	24.83867629	42.29002613	black
EIF5B	5.81E-44	0.384906628	0.576	0.295	1.31E-39	5.22E-43	16.27459614	42.2819327	black
X4430402I18RIK	5.93E-44	0.542139407	0.288	0.111	1.34E-39	5.32E-43	22.91837219	42.27394631	black
DDX3Y	6.12E-44	0.419241424	0.531	0.266	1.38E-39	5.49E-43	17.71733104	42.26044951	black
NDUFV2	6.45E-44	0.497062966	0.43	0.202	1.46E-39	5.78E-43	20.99491644	42.23794138	black
TMED5	6.53E-44	0.560888076	0.254	0.091	1.48E-39	5.84E-43	23.68812639	42.23325012	black
RALYL	6.60E-44	-0.44218206	0.965	0.959	1.49E-39	5.90E-43	18.67293025	42.22905435	black
BBIP1	6.72E-44	0.457367295	0.444	0.211	1.52E-39	6.00E-43	19.31085514	42.22176648	black
INTS10	6.85E-44	0.427554581	0.472	0.226	1.55E-39	6.12E-43	18.04861381	42.21359008	black
GM37240	6.96E-44	0.62096782	0.288	0.112	1.57E-39	6.20E-43	26.20939732	42.2073358	black
X2300009A05RIK	7.15E-44	0.510298107	0.302	0.118	1.62E-39	6.37E-43	21.53258403	42.19608837	black
TALDO1	7.44E-44	0.68013905	0.225	0.075	1.68E-39	6.62E-43	28.68751147	42.17889188	black
SCARB1	8.63E-44	0.578491674	0.275	0.103	1.95E-39	7.67E-43	24.3633506	42.11530034	black
EEFSEC	8.92E-44	0.444825328	0.409	0.187	2.02E-39	7.92E-43	18.72775002	42.10135719	black
KLHL26	1.11E-43	0.710395585	0.217	0.07	2.50E-39	9.81E-43	29.84248853	42.00826859	black
NUDT5	1.12E-43	0.607449368	0.264	0.097	2.53E-39	9.93E-43	25.51478243	42.0031426	black
EIF1B	1.12E-43	0.578303619	0.307	0.125	2.54E-39	9.93E-43	24.29056939	42.0031426	black
RPL34	1.24E-43	0.458324266	0.474	0.229	2.80E-39	1.10E-42	19.23117808	41.95976413	black
EIF2S2	1.30E-43	0.380583916	0.574	0.298	2.94E-39	1.15E-42	15.96150171	41.93950669	black
RPS15A	1.37E-43	0.40320744	0.452	0.214	3.11E-39	1.21E-42	16.90092017	41.91619122	black
MIA2	1.51E-43	0.450965906	0.424	0.197	3.42E-39	1.33E-42	18.88416978	41.87493899	black
ZCCHC17	1.59E-43	0.525735258	0.306	0.123	3.61E-39	1.40E-42	22.00326468	41.8523665	black
OGFRL1	1.63E-43	0.481802906	0.368	0.161	3.69E-39	1.44E-42	20.15989939	41.84262719	black
ATXN7L3B	1.66E-43	0.371746246	0.488	0.238	3.74E-39	1.46E-42	15.55276461	41.8370455	black
NDUFAF4	1.79E-43	0.436759099	0.393	0.177	4.04E-39	1.57E-42	18.25842266	41.80433265	black
MCRIP1	1.82E-43	0.571951917	0.245	0.086	4.12E-39	1.60E-42	23.90534917	41.79608194	black
ERGIC1	1.93E-43	0.448810175	0.452	0.217	4.36E-39	1.69E-42	18.74761305	41.77180933	black
LSM12	1.97E-43	0.686820149	0.219	0.071	4.45E-39	1.72E-42	28.68415861	41.76371158	black
TMEM147	1.99E-43	0.340451529	0.472	0.222	4.49E-39	1.74E-42	14.21727695	41.76006191	black
OSBP2	2.07E-43	0.568335045	0.308	0.125	4.68E-39	1.81E-42	23.72355567	41.74220098	black
X3830406C13RIK	2.10E-43	0.556430313	0.27	0.1	4.75E-39	1.84E-42	23.22324736	41.73612905	black
KPTN	2.16E-43	0.754278029	0.163	0.04	4.89E-39	1.89E-42	31.47152224	41.72403416	black
RHBDL3	2.22E-43	0.482673553	0.506	0.266	5.02E-39	1.94E-42	20.13378854	41.71305519	black
AARSD1	2.24E-43	0.457976664	0.361	0.155	5.05E-39	1.95E-42	19.10264183	41.71095017	black
CLEC16A	2.31E-43	0.442479809	0.524	0.265	5.23E-39	2.01E-42	18.44976066	41.69627696	black
TMSB15B2	2.33E-43	0.697652582	0.145	0.03	5.27E-39	2.03E-42	29.08753941	41.69344479	black
TIMM8B	2.44E-43	0.628438648	0.281	0.108	5.51E-39	2.12E-42	26.18991989	41.67458508	black
SNRNP27	2.69E-43	0.585469521	0.262	0.095	6.08E-39	2.33E-42	24.37439596	41.63222009	black
LRFN5	2.70E-43	-0.336776776	0.992	0.978	6.11E-39	2.34E-42	14.0201654	41.63044009	black
RCAN2	3.33E-43	0.343134288	0.8	0.49	7.53E-39	2.88E-42	14.25394188	41.54041837	black
TSPOAP1	3.52E-43	-1.232933814	0.364	0.449	7.96E-39	3.05E-42	51.1869774	41.51640324	blue
NAPG	3.53E-43	0.399349972	0.475	0.23	7.98E-39	3.05E-42	16.5792983	41.51571174	black
ST18	3.83E-43	1.26286947	0.185	0.057	8.66E-39	3.30E-42	52.3854348	41.48127424	red
CASTOR2	3.83E-43	0.420419476	0.48	0.235	8.66E-39	3.30E-42	17.43953557	41.48127424	black
MSMO1	3.85E-43	0.536152504	0.313	0.128	8.70E-39	3.31E-42	22.23945831	41.47972481	black
CMTM5	4.16E-43	1.060709964	0.104	0.011	9.39E-39	3.57E-42	43.96295914	41.44672968	red
H2.D1	4.65E-43	-1.68387085	0.02	0.115	1.05E-38	4.00E-42	69.70891694	41.3980187	blue
TAF11	5.18E-43	0.62360064	0.234	0.08	1.17E-38	4.45E-42	25.78708656	41.35192446	black
DAGLA	6.08E-43	0.567186816	0.28	0.108	1.37E-38	5.21E-42	23.41511323	41.28289408	black
CAMK2G	6.14E-43	0.402578485	0.622	0.342	1.39E-38	5.27E-42	16.61786621	41.27857503	black
LRRC8B	6.49E-43	0.545655142	0.296	0.118	1.47E-38	5.55E-42	22.5112517	41.25545603	black
NEFL	7.77E-43	0.531796808	0.359	0.159	1.76E-38	6.65E-42	21.89800687	41.17739437	black
DIP2B	8.21E-43	0.41491134	0.753	0.462	1.85E-38	7.01E-42	17.07535313	41.15422137	black
X5430400D12RIK	8.63E-43	0.914656364	0.113	0.016	1.95E-38	7.37E-42	37.62234344	41.13276299	black
DOLK	8.97E-43	0.772442917	0.157	0.038	2.03E-38	7.65E-42	31.76002207	41.11633541	black
D130017N08RIK	9.59E-43	0.667976728	0.2	0.061	2.17E-38	8.17E-42	27.44578765	41.08793987	black
RTN4RL1	9.81E-43	0.572717723	0.291	0.116	2.22E-38	8.35E-42	23.52635156	41.07844163	black
GM10125	9.89E-43	-1.417997998	0.22	0.343	2.24E-38	8.41E-42	58.24445574	41.07513256	blue
COPS6	1.16E-42	0.750019951	0.188	0.055	2.63E-38	9.89E-42	30.75446261	41.00485938	black
CDC40	1.28E-42	0.553119167	0.284	0.111	2.89E-38	1.09E-41	22.65828618	40.96456518	black
MRPL20	1.33E-42	0.782380613	0.187	0.054	3.00E-38	1.13E-41	32.03742888	40.94864872	black
ANKS1	1.37E-42	0.441362585	0.432	0.205	3.09E-38	1.16E-41	18.0680456	40.93696706	black
SRSF7	1.40E-42	0.374006299	0.658	0.363	3.16E-38	1.18E-41	15.30686946	40.92676911	black
DMD	1.40E-42	-0.440372604	0.965	0.931	3.17E-38	1.19E-41	18.02281082	40.92627625	black
FIS1	1.44E-42	0.504313808	0.294	0.116	3.25E-38	1.21E-41	20.634584	40.91615908	black
C2CD3	1.50E-42	0.381787665	0.356	0.152	3.38E-38	1.26E-41	15.61453595	40.89848207	black
CEBPG	1.53E-42	0.662527223	0.226	0.077	3.46E-38	1.29E-41	27.09052756	40.88968218	black
EEF1B2	1.57E-42	0.530891632	0.292	0.115	3.56E-38	1.33E-41	21.70159417	40.87763465	black
SEZ6L2	1.65E-42	0.43584795	0.628	0.349	3.73E-38	1.39E-41	17.8075215	40.85718771	black
URGCP	1.71E-42	0.383559326	0.591	0.314	3.87E-38	1.44E-41	15.66536461	40.84209027	black
SMAD1	1.71E-42	0.429942301	0.423	0.197	3.87E-38	1.44E-41	17.55962529	40.84181817	black
DNAJB9	1.93E-42	0.675212966	0.206	0.065	4.37E-38	1.62E-41	27.54195854	40.79003205	black
FAM122A	1.95E-42	0.802381181	0.16	0.039	4.41E-38	1.64E-41	32.72601975	40.78612575	black
CPOX	1.99E-42	0.638502846	0.241	0.086	4.49E-38	1.67E-41	26.03723971	40.77858053	black
ARFGAP3	2.09E-42	0.598566358	0.237	0.082	4.72E-38	1.75E-41	24.39634994	40.75797043	black
SYNDIG1L	2.29E-42	0.920877044	0.154	0.037	5.18E-38	1.91E-41	37.49636361	40.71810003	black
TVP23B	2.43E-42	0.611035331	0.201	0.061	5.50E-38	2.03E-41	24.8645085	40.69242356	black
DNAJC30	2.47E-42	0.830624027	0.137	0.027	5.58E-38	2.06E-41	33.79505143	40.68633985	black
PLEKHB1	2.49E-42	0.961877164	0.115	0.017	5.62E-38	2.07E-41	39.13282334	40.68380538	black
FAM32A	2.58E-42	0.58654048	0.246	0.088	5.83E-38	2.15E-41	23.85331544	40.66780768	black
ARF1	2.58E-42	0.450271812	0.373	0.166	5.84E-38	2.15E-41	18.31156745	40.66780768	black
RPS18	2.82E-42	0.434908775	0.409	0.188	6.38E-38	2.35E-41	17.67013049	40.62951021	black
ASAP2	2.86E-42	0.412022988	0.483	0.237	6.47E-38	2.38E-41	16.73808242	40.624147	black
NONO	2.88E-42	0.505005471	0.268	0.1	6.52E-38	2.39E-41	20.51405659	40.62145415	black
COX17	3.05E-42	0.5775279	0.279	0.109	6.89E-38	2.53E-41	23.44628731	40.59767037	black
SEC14L5	3.27E-42	1.086421732	0.127	0.023	7.40E-38	2.71E-41	44.07297465	40.56709595	red
CEP57	3.47E-42	0.640209505	0.191	0.056	7.84E-38	2.87E-41	25.9555183	40.54222578	black
KCTD17	3.55E-42	0.61669311	0.244	0.087	8.03E-38	2.94E-41	24.99595272	40.53223933	black
GM19710	3.58E-42	0.766050467	0.166	0.043	8.10E-38	2.96E-41	31.04734044	40.52910583	black
TSPAN2	3.67E-42	0.648835448	0.27	0.104	8.29E-38	3.02E-41	26.29048209	40.51949097	black
SCRN1	3.77E-42	0.486788777	0.331	0.139	8.52E-38	3.10E-41	19.71886032	40.5080422	black
PIGT	3.85E-42	0.638400102	0.212	0.067	8.69E-38	3.17E-41	25.85489589	40.49951715	black
KLHL33	3.94E-42	0.421818739	0.378	0.169	8.91E-38	3.24E-41	17.07917002	40.48935822	black
A930005H10RIK	4.00E-42	0.557974199	0.206	0.065	9.05E-38	3.29E-41	22.58830815	40.48271086	black
RSAD1	4.28E-42	0.693590576	0.191	0.057	9.67E-38	3.51E-41	28.05877102	40.45437177	black
PFN2	4.35E-42	0.527648962	0.351	0.155	9.82E-38	3.56E-41	21.34231572	40.44794409	black
ZFP30	5.30E-42	0.584237027	0.232	0.08	1.20E-37	4.34E-41	23.5812348	40.36244486	black
MRPL38	5.37E-42	0.428474935	0.361	0.158	1.21E-37	4.40E-41	17.29189777	40.35684789	black
MICU1	5.95E-42	0.451506077	0.466	0.23	1.35E-37	4.87E-41	18.20136084	40.31254896	black
SENP8	6.29E-42	0.481251774	0.344	0.148	1.42E-37	5.14E-41	19.38907423	40.28883687	black
TSN	6.69E-42	0.472352277	0.449	0.22	1.51E-37	5.46E-41	19.0182001	40.2627467	black
UBXN11	6.76E-42	0.593482063	0.246	0.089	1.53E-37	5.51E-41	23.89286737	40.25878601	black
USP2	6.96E-42	0.755460778	0.199	0.062	1.57E-37	5.67E-41	30.40454289	40.24635529	black
SNRPE	7.02E-42	0.637722822	0.22	0.073	1.59E-37	5.72E-41	25.66371232	40.24273778	black
ENPP2	7.07E-42	0.719123106	0.398	0.196	1.60E-37	5.75E-41	28.93766127	40.24020508	black
NDUFA12	7.17E-42	0.462455381	0.358	0.157	1.62E-37	5.83E-41	18.60663045	40.23443385	black
DFFA	7.21E-42	0.618219533	0.211	0.068	1.63E-37	5.85E-41	24.87271933	40.23282672	black
MRPS15	7.55E-42	0.430702537	0.34	0.143	1.71E-37	6.12E-41	17.31992269	40.21318939	black
COPS8	7.87E-42	0.570518493	0.224	0.075	1.78E-37	6.38E-41	22.93203959	40.1950855	black
GTPBP2	7.94E-42	0.435912323	0.353	0.152	1.79E-37	6.43E-41	17.52018948	40.19200318	black
RNF7	8.81E-42	0.668698485	0.197	0.06	1.99E-37	7.12E-41	26.84647366	40.14735229	black
FGF12	8.93E-42	-0.319627856	0.988	0.967	2.02E-37	7.22E-41	12.8303974	40.14167467	black
GM16599	9.03E-42	0.533190885	0.291	0.116	2.04E-37	7.29E-41	21.40069393	40.13702132	black
AA465934	9.69E-42	0.735374893	0.172	0.047	2.19E-37	7.82E-41	29.49355024	40.10682243	black
RETREG1	9.92E-42	0.435697328	0.417	0.193	2.24E-37	8.00E-41	17.47014179	40.0969679	black
TAOK3	1.17E-41	0.379101597	0.491	0.242	2.64E-37	9.40E-41	15.17428894	40.02697183	black
TYW1	1.17E-41	0.544756047	0.275	0.106	2.65E-37	9.44E-41	21.80394127	40.02514773	black
NOVA2	1.30E-41	0.41841662	0.423	0.199	2.94E-37	1.05E-40	16.72843211	39.98032417	black
MT.CO3	1.37E-41	-0.57139834	0.811	0.803	3.10E-37	1.10E-40	22.83167161	39.95753924	black
GM46218	1.41E-41	0.898667459	0.115	0.018	3.18E-37	1.13E-40	35.89904024	39.94696801	black
SH3D19	1.55E-41	0.486320311	0.449	0.225	3.51E-37	1.24E-40	19.40671154	39.90520462	black
INF2	1.55E-41	1.00613392	0.106	0.014	3.51E-37	1.24E-40	40.1499403	39.90516519	red
LAMTOR5	1.79E-41	0.697909756	0.174	0.048	4.05E-37	1.44E-40	27.80689028	39.84310299	black
SLC12A2	2.05E-41	0.627125065	0.352	0.161	4.64E-37	1.64E-40	24.95001306	39.78474861	black
CBY1	2.21E-41	0.723799945	0.172	0.047	4.98E-37	1.76E-40	28.77410753	39.75422731	black
RANBP1	2.22E-41	0.57027902	0.266	0.101	5.03E-37	1.77E-40	22.66909514	39.75088395	black
PFKFB4	2.34E-41	0.509301298	0.263	0.099	5.29E-37	1.87E-40	20.23399987	39.72893832	black
TXNRD1	2.42E-41	0.561908275	0.25	0.092	5.47E-37	1.93E-40	22.31602377	39.71470923	black
ME2	2.44E-41	0.55096654	0.284	0.113	5.50E-37	1.94E-40	21.88036338	39.71268994	black
VPS29	2.67E-41	0.656488892	0.229	0.08	6.05E-37	2.13E-40	26.0444801	39.67238506	black
D7ERTD443E	2.71E-41	1.234160791	0.12	0.021	6.13E-37	2.15E-40	48.95542879	39.66697789	red
KLHDC1	2.86E-41	0.45093898	0.32	0.134	6.48E-37	2.27E-40	17.87670716	39.64329532	black
LZTFL1	2.93E-41	0.364301518	0.512	0.256	6.62E-37	2.32E-40	14.43879681	39.63419335	black
RINT1	2.96E-41	0.492751299	0.261	0.098	6.70E-37	2.35E-40	19.52757626	39.62967988	black
HNRNPU	2.96E-41	-0.865082137	0.595	0.59	6.70E-37	2.35E-40	34.28292816	39.62967988	black
IGSF9B	3.21E-41	0.401090181	0.557	0.294	7.27E-37	2.54E-40	15.88112344	39.59489464	black
CRYZL1	3.38E-41	0.350962808	0.548	0.28	7.65E-37	2.67E-40	13.88862816	39.57293438	black
COX19	3.48E-41	0.601181187	0.24	0.086	7.87E-37	2.75E-40	23.78320921	39.56080084	black
ERI3	3.50E-41	0.367275593	0.499	0.25	7.91E-37	2.76E-40	14.52917479	39.55932566	black
MRPS5	3.68E-41	0.387523886	0.392	0.178	8.32E-37	2.90E-40	15.32183369	39.53777877	black
MIGA1	3.75E-41	0.402456787	0.468	0.228	8.48E-37	2.95E-40	15.90904447	39.52982031	black
CCDC117	4.07E-41	0.761998991	0.147	0.034	9.20E-37	3.20E-40	30.09483343	39.49458438	black
TRMT10A	4.17E-41	0.744612459	0.174	0.049	9.44E-37	3.28E-40	29.40031426	39.48404826	black
ANK2	4.23E-41	-0.271195177	0.999	0.991	9.57E-37	3.32E-40	10.70632348	39.47829608	black
DDR1	4.66E-41	0.502133773	0.361	0.161	1.05E-36	3.65E-40	19.80282557	39.43735041	black
VDAC3	5.00E-41	0.392094669	0.425	0.198	1.13E-36	3.92E-40	15.45126277	39.40696976	black
CXCL14	5.67E-41	0.990019527	0.113	0.018	1.28E-36	4.44E-40	38.96023476	39.35299628	black
TRANK1	5.89E-41	-0.970876167	0.504	0.544	1.33E-36	4.61E-40	38.19101503	39.33664904	black
STK24	6.05E-41	0.539071791	0.243	0.088	1.37E-36	4.73E-40	21.19913623	39.32525611	black
BRINP2	6.19E-41	0.526005211	0.558	0.313	1.40E-36	4.83E-40	20.68040417	39.31596824	black
ADGRA1	6.81E-41	0.440507289	0.383	0.175	1.54E-36	5.31E-40	17.30075133	39.27460851	black
SORT1	7.04E-41	0.385889061	0.578	0.309	1.59E-36	5.49E-40	15.15030545	39.26077978	black
AMY1	7.08E-41	-0.806015243	0.613	0.623	1.60E-36	5.51E-40	31.64310215	39.25868948	black
SOX4	7.15E-41	0.777195752	0.185	0.055	1.62E-36	5.57E-40	30.50832598	39.25436536	black
HMGCL	7.87E-41	0.524174986	0.33	0.143	1.78E-36	6.12E-40	20.55473904	39.21350618	black
SIPA1L2	8.46E-41	0.56733594	0.287	0.116	1.91E-36	6.57E-40	22.22964147	39.18250177	black
RWDD3	8.96E-41	0.606034247	0.157	0.039	2.03E-36	6.95E-40	23.73095506	39.15777893	black
SHC3	9.09E-41	0.509118264	0.377	0.173	2.06E-36	7.05E-40	19.93289245	39.15179213	black
CPEB3	1.02E-40	0.346369693	0.939	0.732	2.30E-36	7.89E-40	13.54408767	39.10298136	black
SLC25A11	1.14E-40	0.65043424	0.22	0.075	2.57E-36	8.79E-40	25.40331758	39.05593525	black
GSN	1.21E-40	1.103209607	0.11	0.016	2.73E-36	9.33E-40	43.05848899	39.03019764	red
RAN	1.24E-40	0.450924333	0.309	0.127	2.81E-36	9.62E-40	17.59369445	39.01695507	black
CAPZB	1.25E-40	0.436181081	0.368	0.164	2.83E-36	9.68E-40	17.0172145	39.01410504	black
SWI5	1.26E-40	0.481979016	0.32	0.135	2.85E-36	9.72E-40	18.80304583	39.01216691	black
UPF3B	1.51E-40	0.367104737	0.407	0.19	3.42E-36	1.17E-39	14.29257331	38.93323045	black
TAC1	1.55E-40	1.253573996	0.281	0.123	3.50E-36	1.19E-39	48.79439083	38.92422065	red
EIF2B4	1.55E-40	0.56402333	0.243	0.089	3.51E-36	1.19E-39	21.95355963	38.92314108	black
LAGE3	1.56E-40	0.488425827	0.357	0.159	3.52E-36	1.20E-39	19.01037482	38.92172316	black
MAST3	1.60E-40	0.693612945	0.198	0.063	3.62E-36	1.23E-39	26.98851024	38.91004404	black
DLGAP2	1.61E-40	0.447804601	0.809	0.56	3.63E-36	1.23E-39	17.42363274	38.90900783	black
HIGD1A	1.73E-40	0.527080733	0.298	0.122	3.92E-36	1.33E-39	20.49084511	38.87610344	black
SLC22A17	1.75E-40	0.351350883	0.918	0.673	3.95E-36	1.34E-39	13.65820057	38.87339189	black
MCF2L	1.89E-40	0.344031279	0.586	0.311	4.28E-36	1.45E-39	13.36170378	38.83863061	black
TAF7	2.05E-40	0.808393299	0.132	0.027	4.63E-36	1.57E-39	31.36956606	38.80483187	black
RESP18	2.09E-40	0.478855141	0.87	0.641	4.72E-36	1.59E-39	18.57831225	38.79735361	black
CLU	2.25E-40	0.412592371	0.47	0.233	5.08E-36	1.72E-39	15.9942244	38.76519664	black
COMT	2.40E-40	0.425547563	0.485	0.244	5.42E-36	1.83E-39	16.48484946	38.73797168	black
NUP43	2.42E-40	0.758385088	0.138	0.03	5.48E-36	1.85E-39	29.37512129	38.7337802	black
SLC39A13	2.61E-40	0.651205105	0.227	0.08	5.90E-36	1.99E-39	25.20269503	38.70162385	black
EIF4EBP2	2.65E-40	0.529855009	0.236	0.085	6.00E-36	2.02E-39	20.50262814	38.69478967	black
AKR1A1	2.71E-40	0.413566839	0.397	0.184	6.12E-36	2.06E-39	15.99952187	38.68666526	black
SEC61G	2.84E-40	0.499813846	0.315	0.133	6.41E-36	2.15E-39	19.32625981	38.66691562	black
TXN2	2.88E-40	0.595154795	0.218	0.073	6.52E-36	2.19E-39	23.00856078	38.65979236	black
SNX30	2.92E-40	0.406576944	0.391	0.18	6.61E-36	2.22E-39	15.71604188	38.65453293	black
DPY30	3.02E-40	0.490816356	0.283	0.112	6.84E-36	2.29E-39	18.9651054	38.63992139	black
COX11	3.25E-40	0.559668703	0.264	0.101	7.35E-36	2.46E-39	21.60809905	38.60873217	black
TOMM22	3.46E-40	0.638086655	0.213	0.072	7.82E-36	2.62E-39	24.61883993	38.58228307	black
IGF2BP3	3.49E-40	0.473898696	0.353	0.158	7.88E-36	2.63E-39	18.28275004	38.57944791	black
NPM1	3.50E-40	0.427835487	0.409	0.193	7.90E-36	2.64E-39	16.50521282	38.57841002	black
FBXW2	3.82E-40	0.42066081	0.397	0.184	8.63E-36	2.88E-39	16.21262331	38.54084559	black
SLIRP	3.83E-40	0.445935984	0.313	0.132	8.65E-36	2.88E-39	17.18645236	38.54017839	black
CDH19	3.91E-40	1.177134502	0.103	0.014	8.84E-36	2.94E-39	45.3561648	38.53099601	red
BFAR	3.98E-40	0.393261219	0.361	0.161	8.99E-36	2.99E-39	15.15004455	38.52412544	black
RPL27	4.25E-40	0.375678632	0.484	0.239	9.60E-36	3.19E-39	14.46206748	38.49584789	black
ZFP112	4.44E-40	0.526682442	0.249	0.093	1.00E-35	3.33E-39	20.26511438	38.47691279	black
NFU1	4.45E-40	0.574771553	0.234	0.084	1.01E-35	3.34E-39	22.11511649	38.47635875	black
SUGP1	4.52E-40	0.364232321	0.433	0.207	1.02E-35	3.39E-39	14.01208544	38.47018679	black
GTF3C1	4.64E-40	0.410820477	0.368	0.164	1.05E-35	3.47E-39	15.79986072	38.45928237	black
ALKBH1	5.27E-40	0.481238831	0.324	0.139	1.19E-35	3.95E-39	18.48145496	38.40391458	black
CAP2	5.42E-40	0.471997544	0.539	0.295	1.22E-35	4.05E-39	18.12110039	38.39236163	black
TACC1	6.04E-40	0.414129215	0.582	0.319	1.37E-35	4.51E-39	15.8799881	38.34549102	black
X2810013P06RIK	6.18E-40	0.648140394	0.193	0.059	1.40E-35	4.62E-39	24.84692513	38.33571452	black
TRIM59	6.38E-40	1.085626926	0.117	0.02	1.44E-35	4.76E-39	41.6042711	38.32280693	red
CDC42EP3	6.54E-40	0.707407441	0.166	0.045	1.48E-35	4.87E-39	27.10224688	38.31207492	black
NCAPH2	6.62E-40	0.481428965	0.302	0.125	1.50E-35	4.93E-39	18.44227478	38.30736441	black
KIF3C	6.63E-40	0.353920905	0.51	0.257	1.50E-35	4.94E-39	13.55753764	38.30668787	black
CHST11	7.99E-40	0.453000965	0.318	0.135	1.81E-35	5.94E-39	17.31656205	38.22632487	black
ZFP692	1.01E-39	0.365877964	0.597	0.324	2.27E-35	7.47E-39	13.94962985	38.12645534	black
BCLAF3	1.15E-39	0.418577496	0.354	0.159	2.61E-35	8.57E-39	15.93409078	38.06724191	black
PLEKHH1	1.18E-39	0.870721415	0.181	0.055	2.66E-35	8.73E-39	33.13877577	38.05898787	black
TRP53INP2	1.20E-39	0.503556522	0.228	0.08	2.71E-35	8.90E-39	19.16075159	38.05084586	black
DAAM2	1.28E-39	0.973800514	0.123	0.023	2.90E-35	9.51E-39	37.02568352	38.02183608	black
PALM	1.30E-39	0.302668837	0.377	0.168	2.94E-35	9.64E-39	11.50628622	38.01609161	black
CTR9	1.32E-39	0.504197946	0.265	0.103	2.97E-35	9.72E-39	19.16563974	38.01213374	black
NTAN1	1.41E-39	0.476456629	0.331	0.144	3.18E-35	1.04E-38	18.0975172	37.98355633	black
CHN1	1.54E-39	0.373733612	0.672	0.387	3.49E-35	1.14E-38	14.18069735	37.94332883	black
CCDC93	1.56E-39	0.487023002	0.305	0.127	3.54E-35	1.15E-38	18.47670758	37.93805943	black
CDC42SE2	1.62E-39	0.432796554	0.363	0.164	3.67E-35	1.19E-38	16.41282285	37.92272072	black
NDUFA3	1.67E-39	0.437280008	0.358	0.162	3.78E-35	1.23E-38	16.57702223	37.90939886	black
CLUAP1	1.76E-39	0.457000324	0.328	0.143	3.99E-35	1.30E-38	17.31437845	37.8870157	black
UQCR11	1.80E-39	0.525867429	0.297	0.124	4.06E-35	1.32E-38	19.91948591	37.87929203	black
MEIS2	1.83E-39	0.564334235	0.524	0.316	4.14E-35	1.35E-38	21.37195582	37.8710957	black
MICOS13	1.92E-39	0.678994945	0.21	0.071	4.34E-35	1.41E-38	25.70088084	37.85135814	black
IER3IP1	2.10E-39	0.375536002	0.38	0.173	4.74E-35	1.54E-38	14.20019022	37.81312612	black
CCT6A	2.12E-39	0.482258417	0.273	0.107	4.80E-35	1.55E-38	18.23343492	37.80843272	black
A330076H08RIK	2.13E-39	0.314245389	0.961	0.839	4.81E-35	1.56E-38	11.88077026	37.80730181	black
E230029C05RIK	2.46E-39	-1.650316043	0.081	0.198	5.57E-35	1.80E-38	62.29075232	37.74474143	blue
PSMB7	2.49E-39	0.480050068	0.319	0.137	5.63E-35	1.82E-38	18.11697759	37.7397667	black
THAP4	2.51E-39	0.498342289	0.257	0.098	5.67E-35	1.83E-38	18.80602137	37.73715732	black
KLHL2	2.53E-39	0.436936172	0.431	0.21	5.72E-35	1.85E-38	16.48717222	37.73359426	black
NDUFB11	2.55E-39	0.497882483	0.279	0.112	5.77E-35	1.86E-38	18.78543182	37.73065421	black
MEF2D	2.69E-39	0.405196164	0.426	0.205	6.08E-35	1.96E-38	15.27926794	37.70832328	black
RPS19	2.71E-39	0.352419106	0.569	0.302	6.13E-35	1.97E-38	13.28783124	37.70462786	black
SRPR	2.73E-39	0.368146496	0.4	0.187	6.16E-35	1.98E-38	13.88022589	37.70299607	black
UBE2J2	3.19E-39	0.335120922	0.377	0.172	7.21E-35	2.32E-38	12.61242392	37.63544169	black
PER2	3.35E-39	0.658700919	0.219	0.077	7.57E-35	2.43E-38	24.77671524	37.61451444	black
X4930430F08RIK	3.51E-39	0.637327206	0.174	0.05	7.94E-35	2.55E-38	23.95963843	37.59393636	black
RPS20	3.66E-39	0.419159131	0.347	0.153	8.28E-35	2.65E-38	15.75033499	37.57602739	black
RPS25	3.81E-39	0.373295918	0.459	0.228	8.62E-35	2.76E-38	14.02064629	37.5590667	black
ZMYM6	4.00E-39	0.42689955	0.329	0.143	9.05E-35	2.90E-38	16.02502197	37.53815614	black
PRDX6	4.15E-39	0.656026531	0.196	0.063	9.38E-35	3.00E-38	24.61603771	37.52293018	black
KCNJ10	4.62E-39	0.932197206	0.106	0.016	1.04E-34	3.34E-38	34.93561985	37.4766408	black
FBXO9	4.78E-39	0.496268249	0.298	0.125	1.08E-34	3.45E-38	18.59132293	37.46224543	black
AIMP1	5.16E-39	0.529527543	0.264	0.103	1.17E-34	3.72E-38	19.81980179	37.42921791	black
ACSL3	5.56E-39	0.450261918	0.447	0.222	1.26E-34	4.00E-38	16.83873553	37.39764539	black
ALS2	5.69E-39	0.505651727	0.294	0.123	1.29E-34	4.10E-38	18.9049899	37.38737338	black
EIF3C	6.19E-39	0.554198172	0.26	0.101	1.40E-34	4.45E-38	20.70007947	37.35140339	black
RAB5IF	6.21E-39	0.488692963	0.235	0.086	1.40E-34	4.46E-38	18.2529477	37.35054337	black
ATP5G3	6.98E-39	0.407807012	0.403	0.189	1.58E-34	5.01E-38	15.21122503	37.30005763	black
SYT11	7.15E-39	0.324486049	0.91	0.679	1.62E-34	5.13E-38	12.10009325	37.29002611	black
FUCA1	7.65E-39	0.642151251	0.221	0.079	1.73E-34	5.49E-38	23.92701131	37.26070966	black
MAP1LC3A	7.73E-39	0.454719728	0.365	0.168	1.75E-34	5.54E-38	16.94138505	37.25676276	black
PXMP4	7.80E-39	0.665497467	0.188	0.059	1.76E-34	5.58E-38	24.79186355	37.25312983	black
PTDSS2	8.09E-39	0.347471626	0.338	0.146	1.83E-34	5.78E-38	12.9391059	37.23787769	black
GM10516	8.15E-39	0.440522666	0.279	0.112	1.84E-34	5.82E-38	16.40285469	37.23498465	black
X2310033P09RIK	8.47E-39	0.560644668	0.237	0.088	1.92E-34	6.05E-38	20.86621083	37.21824542	black
PDE8A	8.61E-39	1.01721499	0.11	0.018	1.95E-34	6.14E-38	37.85219839	37.21160107	red
ACAT1	8.75E-39	0.365310015	0.599	0.331	1.98E-34	6.24E-38	13.59136279	37.20501004	black
X4931415C17RIK	8.78E-39	0.887496003	0.104	0.015	1.98E-34	6.25E-38	33.01833048	37.20392021	black
ELP5	8.90E-39	0.614354039	0.201	0.066	2.01E-34	6.33E-38	22.85302703	37.1984647	black
NFASC	8.92E-39	0.360655958	0.755	0.472	2.02E-34	6.34E-38	13.41559099	37.19775233	black
GLT8D1	8.98E-39	0.388628854	0.424	0.205	2.03E-34	6.38E-38	14.45505167	37.1950037	black
SOX2OT	9.18E-39	0.942746716	0.215	0.079	2.07E-34	6.52E-38	35.05703666	37.18606074	black
CACNG8	9.32E-39	0.550264274	0.254	0.098	2.11E-34	6.61E-38	20.45860426	37.17959757	black
SH3BGRL3	1.06E-38	0.654967914	0.188	0.059	2.39E-34	7.51E-38	24.31528759	37.12439506	black
COA3	1.07E-38	0.676305159	0.179	0.054	2.42E-34	7.58E-38	25.10477667	37.12048673	black
WDR45B	1.12E-38	0.499730433	0.305	0.13	2.54E-34	7.94E-38	18.54008212	37.10016621	black
ITGAV	1.13E-38	0.739596639	0.177	0.054	2.55E-34	7.97E-38	27.43803557	37.09864825	black
SHC2	1.26E-38	0.459628469	0.28	0.113	2.84E-34	8.88E-38	17.03004108	37.05175421	black
SLC25A3	1.31E-38	0.369521721	0.627	0.349	2.95E-34	9.22E-38	13.685327	37.03524369	black
RNF149	1.31E-38	0.618259631	0.212	0.073	2.97E-34	9.26E-38	22.8962248	37.03334916	black
GPATCH11	1.46E-38	0.659973125	0.172	0.05	3.30E-34	1.03E-37	24.41085865	36.98765559	black
TAF13	1.46E-38	0.708763053	0.139	0.032	3.30E-34	1.03E-37	26.2154837	36.98765559	black
FKBP1A	1.51E-38	0.405272135	0.421	0.205	3.41E-34	1.06E-37	14.98439458	36.97366113	black
GFER	1.73E-38	0.695606942	0.169	0.049	3.91E-34	1.22E-37	25.67807135	36.91462781	black
LIMK2	1.74E-38	0.369843865	0.44	0.215	3.94E-34	1.22E-37	13.65177882	36.91227602	black
NDUFA1	1.85E-38	0.581135902	0.241	0.091	4.17E-34	1.30E-37	21.43657528	36.88737041	black
CEP164	1.87E-38	0.337467333	0.466	0.23	4.24E-34	1.31E-37	12.44622978	36.88128764	black
MYO18A	1.92E-38	0.346760429	0.56	0.298	4.34E-34	1.35E-37	12.78530752	36.87072242	black
CORO2B	2.13E-38	0.35336617	0.399	0.188	4.80E-34	1.49E-37	13.01349765	36.82723128	black
LAPTM4A	2.53E-38	0.376136227	0.463	0.229	5.72E-34	1.77E-37	13.82365591	36.75172692	black
YIF1B	2.60E-38	0.609623227	0.216	0.075	5.87E-34	1.82E-37	22.39810809	36.7409034	black
HS3ST1	2.61E-38	0.630401914	0.197	0.065	5.90E-34	1.82E-37	23.1602358	36.73884119	black
RP9	2.62E-38	0.340698339	0.623	0.344	5.93E-34	1.83E-37	12.51635649	36.73735691	black
NUDCD2	2.68E-38	0.538732249	0.206	0.07	6.06E-34	1.87E-37	19.78651319	36.72791674	black
MTO1	2.76E-38	0.408151433	0.275	0.11	6.24E-34	1.92E-37	14.98564168	36.71588648	black
NDUFA7	2.81E-38	0.479436487	0.265	0.105	6.35E-34	1.96E-37	17.59955143	36.70882777	black
CTSB	2.91E-38	0.357962239	0.811	0.525	6.58E-34	2.03E-37	13.13484151	36.69337172	black
TMED10	3.28E-38	0.371765229	0.512	0.268	7.42E-34	2.28E-37	13.62205583	36.64155427	black
CTTNBP2	3.29E-38	0.377874135	0.928	0.733	7.43E-34	2.28E-37	13.84586668	36.64147763	black
SRR	3.58E-38	0.351902405	0.49	0.25	8.09E-34	2.48E-37	12.88127956	36.60469312	black
ZSCAN22	3.59E-38	0.739021943	0.167	0.048	8.12E-34	2.49E-37	27.05081927	36.60354003	black
MGAT5B	3.62E-38	0.405008155	0.453	0.228	8.18E-34	2.51E-37	14.82367506	36.60092983	black
TCF25	3.62E-38	0.343351479	0.782	0.485	8.18E-34	2.51E-37	12.56698339	36.60092983	black
RNF187	3.69E-38	0.376486119	0.412	0.198	8.35E-34	2.56E-37	13.77660229	36.5925903	black
CCDC12	3.75E-38	0.413300771	0.302	0.127	8.47E-34	2.59E-37	15.12114095	36.58628778	black
BCS1L	3.79E-38	0.580887524	0.206	0.07	8.56E-34	2.62E-37	21.25025718	36.58239558	black
SIK3	4.36E-38	0.364502214	0.907	0.68	9.85E-34	3.01E-37	13.31227563	36.52179639	black
ARPC2	4.54E-38	0.36449082	0.459	0.227	1.03E-33	3.13E-37	13.30543351	36.50416631	black
GABRB1	4.64E-38	-0.492112927	0.912	0.886	1.05E-33	3.20E-37	17.959525	36.49472307	black
POLR2M	4.78E-38	0.536233893	0.222	0.079	1.08E-33	3.29E-37	19.56323153	36.48264646	black
HBB.BS	4.88E-38	0.959830098	0.123	0.025	1.10E-33	3.36E-37	35.00849919	36.47364179	black
TRMT13	5.35E-38	0.394145254	0.359	0.163	1.21E-33	3.68E-37	14.36038737	36.43425167	black
NMT1	5.49E-38	0.356352703	0.425	0.205	1.24E-33	3.77E-37	12.97955355	36.42333413	black
FAM162A	5.52E-38	0.577970141	0.206	0.071	1.25E-33	3.79E-37	21.05027398	36.42104063	black
CNIH2	5.76E-38	0.506396774	0.232	0.085	1.30E-33	3.96E-37	18.43428112	36.40284074	black
ZFP1	6.31E-38	0.435931534	0.304	0.129	1.43E-33	4.33E-37	15.8520468	36.36361579	black
QK	6.92E-38	0.628969589	0.53	0.302	1.56E-33	4.74E-37	22.84695462	36.32441858	black
SYS1	7.00E-38	0.358188513	0.35	0.157	1.58E-33	4.79E-37	13.00927582	36.31963438	black
RBMXL1	7.04E-38	0.793109422	0.129	0.028	1.59E-33	4.82E-37	28.80348921	36.31716936	black
SMAP1	7.58E-38	0.319989379	0.452	0.222	1.71E-33	5.18E-37	11.61102085	36.2856445	black
ADCK1	7.88E-38	0.543396258	0.256	0.1	1.78E-33	5.38E-37	19.70842555	36.26897549	black
CNTN1	8.43E-38	-0.38226397	0.962	0.918	1.91E-33	5.75E-37	13.85328306	36.24009623	black
RPS3A1	8.63E-38	0.385006057	0.421	0.204	1.95E-33	5.88E-37	13.94888209	36.2302926	black
ADD2	8.82E-38	0.352577916	0.6	0.332	1.99E-33	6.01E-37	12.77073697	36.22103485	black
MRAS	9.02E-38	0.492434304	0.244	0.093	2.04E-33	6.14E-37	17.83194176	36.21181875	black
JPT1	9.81E-38	0.514025714	0.264	0.106	2.22E-33	6.67E-37	18.59520235	36.17562668	black
EN1	9.88E-38	0.968208119	0.107	0.018	2.23E-33	6.71E-37	35.02301815	36.17302673	black
RPH3A	9.97E-38	0.40908637	0.465	0.242	2.25E-33	6.77E-37	14.79631158	36.16916295	black
PITPNC1	1.08E-37	0.372046204	0.726	0.463	2.45E-33	7.36E-37	13.44325609	36.13329728	black
TMED4	1.13E-37	0.372397385	0.358	0.161	2.56E-33	7.69E-37	13.44875814	36.1139973	black
BACE1	1.17E-37	0.476989525	0.253	0.098	2.64E-33	7.91E-37	17.22021105	36.10186419	black
SUCLA2	1.24E-37	0.36963066	0.345	0.154	2.80E-33	8.39E-37	13.33490182	36.07628707	black
UBE2E1	1.24E-37	0.385901977	0.372	0.173	2.80E-33	8.39E-37	13.92188021	36.07620856	black
CARS	1.27E-37	0.428653093	0.29	0.121	2.87E-33	8.60E-37	15.45962007	36.06557452	black
ADIPOR1	1.31E-37	0.433306596	0.27	0.108	2.96E-33	8.85E-37	15.62205272	36.05311545	black
MAP3K13	1.35E-37	0.457044053	0.356	0.164	3.05E-33	9.10E-37	16.47238654	36.0411353	black
MARK3	1.50E-37	0.345455674	0.716	0.428	3.39E-33	1.01E-36	12.43487224	35.99556521	black
CITED2	1.53E-37	0.672153158	0.148	0.038	3.46E-33	1.03E-36	24.18868793	35.98686945	black
ERGIC3	1.54E-37	0.377579852	0.405	0.193	3.48E-33	1.04E-36	13.58684385	35.98402767	black
ZFP809	1.77E-37	0.700675081	0.157	0.043	4.01E-33	1.19E-36	25.17061999	35.923384	black
ATP6V1G2	2.03E-37	0.360525787	0.414	0.201	4.59E-33	1.37E-36	12.93009805	35.86455814	black
PNPLA3	2.18E-37	0.51677431	0.196	0.065	4.93E-33	1.47E-36	18.51809703	35.83401242	black
IFNAR2	2.19E-37	0.466359333	0.217	0.077	4.94E-33	1.47E-36	16.7110539	35.8329998	black
N4BP2L1	2.34E-37	0.368809691	0.528	0.28	5.29E-33	1.57E-36	13.20499704	35.80436564	black
SNAP25	2.41E-37	0.296805559	0.983	0.884	5.44E-33	1.61E-36	10.62329027	35.79208659	black
PCDH11X	2.48E-37	-1.040807977	0.421	0.526	5.61E-33	1.66E-36	37.23923993	35.77916461	blue
ASPH	2.65E-37	0.384695774	0.504	0.261	5.99E-33	1.77E-36	13.75334447	35.75122318	black
ITPK1	2.90E-37	0.460886375	0.243	0.093	6.55E-33	1.94E-36	16.45940902	35.71250941	black
EPDR1	2.95E-37	0.435433954	0.318	0.139	6.67E-33	1.97E-36	15.5471962	35.7050617	black
CUEDC1	3.16E-37	0.394017626	0.375	0.175	7.15E-33	2.11E-36	14.05657018	35.6749781	black
PPP1R7	3.23E-37	0.541873124	0.231	0.086	7.31E-33	2.16E-36	19.32643807	35.66598385	black
METTL9	3.35E-37	0.518789828	0.214	0.076	7.58E-33	2.24E-36	18.4950056	35.6502857	black
ITPR1	3.40E-37	0.380154959	0.59	0.345	7.69E-33	2.27E-36	13.55032779	35.64422209	black
RIOK1	3.50E-37	0.311909291	0.389	0.183	7.91E-33	2.33E-36	11.11407008	35.63237905	black
RHOQ	3.56E-37	0.570021249	0.249	0.098	8.05E-33	2.37E-36	20.30715264	35.62525552	black
SERAC1	3.73E-37	0.514187112	0.216	0.077	8.42E-33	2.48E-36	18.30816657	35.60603943	black
HSD17B12	3.73E-37	0.403245715	0.375	0.176	8.44E-33	2.48E-36	14.35775896	35.60548426	black
PHF3	3.81E-37	0.320983802	0.671	0.383	8.61E-33	2.53E-36	11.42610011	35.59712375	black
BAG1	3.98E-37	0.579470971	0.186	0.06	9.01E-33	2.64E-36	20.61633594	35.57785805	black
COX14	3.99E-37	0.585763286	0.235	0.089	9.01E-33	2.64E-36	20.84016364	35.57779078	black
ARL14EP	4.15E-37	0.531499893	0.21	0.073	9.38E-33	2.75E-36	18.90058547	35.56084533	black
SF3B1	4.21E-37	0.307567295	0.74	0.441	9.52E-33	2.79E-36	10.93554037	35.55495189	black
TAF8	4.30E-37	0.726350138	0.138	0.034	9.72E-33	2.85E-36	25.8187518	35.54587582	black
PFDN1	4.32E-37	0.343838928	0.433	0.215	9.76E-33	2.85E-36	12.22167762	35.54477585	black
ZMIZ1	4.42E-37	0.393553418	0.381	0.182	9.98E-33	2.92E-36	13.98493945	35.53504762	black
SDF2	5.15E-37	0.40822771	0.359	0.166	1.16E-32	3.40E-36	14.47926287	35.46859392	black
CFL2	5.34E-37	0.405277359	0.33	0.147	1.21E-32	3.52E-36	14.36826951	35.45292922	black
SMIM20	5.65E-37	0.712909172	0.153	0.042	1.28E-32	3.72E-36	25.25780922	35.42921064	black
EPN2	5.99E-37	0.365760841	0.461	0.234	1.35E-32	3.95E-36	12.94931443	35.40377479	black
SNTG1	6.07E-37	-0.408965434	0.98	0.951	1.37E-32	4.00E-36	14.47672636	35.39841063	black
CSPG5	6.15E-37	0.386793121	0.67	0.401	1.39E-32	4.04E-36	13.68984132	35.39318718	black
RNF144A	6.31E-37	0.487326734	0.243	0.094	1.43E-32	4.15E-36	17.24279685	35.3824152	black
REXO2	6.83E-37	0.540627044	0.228	0.085	1.54E-32	4.48E-36	19.11028235	35.34836549	black
P4HTM	6.89E-37	0.324126066	0.474	0.238	1.56E-32	4.52E-36	11.45628475	35.34515106	black
ANAPC11	7.20E-37	0.489225999	0.235	0.089	1.63E-32	4.72E-36	17.28249623	35.32620153	black
DSCAM	8.27E-37	-0.370800044	0.943	0.91	1.87E-32	5.42E-36	13.07668091	35.26612552	black
TMEM9	8.84E-37	0.383250667	0.378	0.179	2.00E-32	5.79E-36	13.50483462	35.23760244	black
FGF22	8.85E-37	0.76081214	0.133	0.031	2.00E-32	5.79E-36	26.80890791	35.23722415	black
PPP2R1A	9.12E-37	0.478137865	0.279	0.116	2.06E-32	5.96E-36	16.84216578	35.224497	black
IQSEC1	9.42E-37	0.386642802	0.708	0.43	2.13E-32	6.15E-36	13.61400311	35.21080188	black
SEMA6A	1.06E-36	0.349306934	0.703	0.445	2.40E-32	6.92E-36	12.28153776	35.15973076	black
GM11817	1.11E-36	0.820048733	0.121	0.025	2.50E-32	7.22E-36	28.81769059	35.14143665	black
RPS26	1.13E-36	0.399596002	0.394	0.189	2.56E-32	7.39E-36	14.03832709	35.13130016	black
HACD2	1.15E-36	0.381511108	0.356	0.166	2.61E-32	7.51E-36	13.40024944	35.12413968	black
MAP1A	1.19E-36	0.315809956	0.399	0.191	2.70E-32	7.76E-36	11.08805058	35.10988293	black
DLAT	1.25E-36	0.330965754	0.496	0.256	2.84E-32	8.16E-36	11.61308379	35.08847562	black
CSNK2A1	1.27E-36	0.34223205	0.454	0.227	2.88E-32	8.27E-36	12.00639823	35.08262369	black
ILDR2	1.45E-36	0.548516317	0.281	0.12	3.27E-32	9.38E-36	19.21326798	35.02770547	black
RER1	1.47E-36	0.431046836	0.272	0.11	3.33E-32	9.54E-36	15.09536479	35.02024262	black
DGAT1	1.51E-36	0.356093275	0.329	0.148	3.42E-32	9.80E-36	12.46643985	35.00891688	black
NRN1	1.53E-36	0.422085798	0.466	0.243	3.46E-32	9.93E-36	14.77435713	35.00320831	black
FERMT2	1.56E-36	0.445652382	0.332	0.152	3.52E-32	1.01E-35	15.59631207	34.99658636	black
ARFGAP2	1.67E-36	0.539865285	0.218	0.079	3.77E-32	1.08E-35	18.87733954	34.9667594	black
ATP1A2	1.68E-36	0.693448941	0.15	0.04	3.80E-32	1.09E-35	24.2455659	34.96373626	black
TCP1	1.69E-36	0.449027889	0.297	0.128	3.82E-32	1.09E-35	15.69906841	34.96234597	black
D10WSU102E	1.80E-36	0.538332965	0.256	0.104	4.08E-32	1.16E-35	18.80608724	34.93393211	black
NDRG1	1.91E-36	0.713960765	0.134	0.032	4.31E-32	1.23E-35	24.92427677	34.90986897	black
TMEM63C	1.97E-36	0.452660217	0.326	0.147	4.44E-32	1.27E-35	15.79658249	34.89721848	black
MINPP1	2.07E-36	0.434821249	0.309	0.134	4.67E-32	1.33E-35	15.16477245	34.87587714	black
RMST	2.09E-36	-0.473193046	0.894	0.901	4.72E-32	1.34E-35	16.50104434	34.87169664	black
NICN1	2.35E-36	0.450382455	0.243	0.094	5.30E-32	1.51E-35	15.68292455	34.82134876	black
URM1	2.46E-36	0.453347895	0.261	0.105	5.57E-32	1.58E-35	15.77674914	34.8005347	black
KMT2D	2.49E-36	-1.565064931	0.121	0.236	5.62E-32	1.60E-35	54.45939823	34.79689383	blue
ZMYND8	2.59E-36	0.346815691	0.852	0.588	5.84E-32	1.66E-35	12.06230977	34.78017314	black
LRCH3	2.85E-36	0.321684536	0.633	0.357	6.44E-32	1.83E-35	11.1747666	34.73827722	black
PRXL2C	2.93E-36	0.501736226	0.292	0.126	6.63E-32	1.88E-35	17.42318463	34.72578565	black
RFC2	3.05E-36	0.413412539	0.31	0.136	6.90E-32	1.96E-35	14.34902047	34.70872101	black
IKBKB	3.38E-36	0.336167309	0.318	0.139	7.65E-32	2.17E-35	11.65307008	34.66449524	black
PPP2R2C	3.66E-36	0.318586043	0.502	0.258	8.26E-32	2.34E-35	11.03305451	34.63131777	black
PDCD5	3.81E-36	0.478103836	0.249	0.099	8.60E-32	2.43E-35	16.54912999	34.61409164	black
PARL	3.81E-36	0.376052535	0.252	0.099	8.62E-32	2.43E-35	13.01660438	34.61379242	black
RPAP1	3.86E-36	-1.489425746	0.174	0.287	8.72E-32	2.46E-35	51.54707439	34.60869031	blue
DRG1	3.86E-36	0.353483939	0.579	0.317	8.74E-32	2.46E-35	12.23350849	34.60838563	black
CALR	3.94E-36	0.362308633	0.634	0.363	8.90E-32	2.51E-35	12.53604862	34.60046899	black
RABEPK	4.05E-36	0.545388388	0.223	0.083	9.15E-32	2.58E-35	18.86431145	34.58876621	black
ZRANB2	4.32E-36	0.334460128	0.857	0.588	9.76E-32	2.75E-35	11.55928453	34.56102405	black
TFAP2D	4.35E-36	0.537140397	0.344	0.169	9.83E-32	2.77E-35	18.56261307	34.5582145	black
AFF3	4.38E-36	0.358215748	0.814	0.557	9.90E-32	2.78E-35	12.37843334	34.55580441	black
PINK1	4.41E-36	0.508133886	0.228	0.086	9.96E-32	2.80E-35	17.55760991	34.55311759	black
KCNB2	4.87E-36	-0.466994059	0.887	0.893	1.10E-31	3.09E-35	16.11588087	34.50981987	black
CSMD2	5.12E-36	0.34788687	0.855	0.607	1.16E-31	3.24E-35	11.9982972	34.4890774	black
CLPB	5.16E-36	0.387854196	0.352	0.161	1.17E-31	3.27E-35	13.37526426	34.48528956	black
A230057D06RIK	5.18E-36	-0.336356216	0.978	0.952	1.17E-31	3.28E-35	11.59894877	34.48412197	black
FSTL4	5.35E-36	0.647855108	0.363	0.185	1.21E-31	3.38E-35	22.3320088	34.47068417	black
ARXES2	5.48E-36	0.404228563	0.348	0.159	1.24E-31	3.46E-35	13.93005888	34.46084754	black
BICRA	5.58E-36	0.35274908	0.366	0.171	1.26E-31	3.53E-35	12.15312399	34.45260291	black
C1QTNF4	5.76E-36	0.352725007	0.592	0.332	1.30E-31	3.63E-35	12.14773608	34.43967913	black
MT2	5.97E-36	0.717468385	0.145	0.038	1.35E-31	3.76E-35	24.69845535	34.42445115	black
TMEM80	5.98E-36	0.522252236	0.226	0.085	1.35E-31	3.77E-35	17.9778088	34.42361286	black
PSMD4	6.61E-36	0.349044949	0.389	0.187	1.49E-31	4.16E-35	12.0004627	34.38085192	black
RAB11FIP2	6.62E-36	0.336919464	0.495	0.258	1.50E-31	4.17E-35	11.58329739	34.38001848	black
TIPIN	6.76E-36	0.476065559	0.269	0.111	1.53E-31	4.25E-35	16.36305581	34.37143371	black
GALNT13	6.87E-36	-0.47951101	0.903	0.866	1.55E-31	4.32E-35	16.47827602	34.36475008	black
TPRKB	6.88E-36	0.367323887	0.23	0.086	1.55E-31	4.32E-35	12.62292364	34.36455967	black
SLITRK3	6.97E-36	0.503013334	0.225	0.084	1.58E-31	4.37E-35	17.28316027	34.35924877	black
EIF5A	7.23E-36	0.440916944	0.304	0.133	1.63E-31	4.53E-35	15.14267489	34.3435994	black
ABLIM2	8.13E-36	0.318864335	0.667	0.387	1.84E-31	5.10E-35	10.93475944	34.29282691	black
SYCP2	8.42E-36	0.518304583	0.249	0.1	1.90E-31	5.27E-35	17.76635507	34.27782749	black
RNF103	8.81E-36	0.400548559	0.317	0.142	1.99E-31	5.51E-35	13.72229897	34.25876506	black
NDUFS6	9.03E-36	0.578780934	0.233	0.09	2.04E-31	5.65E-35	19.82225925	34.24829341	black
GNA11	9.40E-36	0.463837798	0.235	0.09	2.13E-31	5.88E-35	15.8776081	34.2309492	black
MED4	9.93E-36	0.601744668	0.168	0.051	2.24E-31	6.20E-35	20.5842826	34.2076693	black
ZFP2	1.02E-35	0.461861955	0.254	0.102	2.29E-31	6.33E-35	15.79488454	34.19828016	black
ANK1	1.04E-35	0.380660734	0.698	0.425	2.34E-31	6.47E-35	13.01450986	34.18926275	black
TTC7B	1.09E-35	0.331142361	0.616	0.346	2.47E-31	6.80E-35	11.31425597	34.16734703	black
WDR12	1.13E-35	0.387570683	0.374	0.179	2.56E-31	7.06E-35	13.23595459	34.1510727	black
VPS28	1.29E-35	0.329052304	0.297	0.127	2.93E-31	8.05E-35	11.21873851	34.09408886	black
RPLP2	1.34E-35	0.319075972	0.524	0.277	3.03E-31	8.34E-35	10.87376906	34.07893419	black
GON4L	1.37E-35	0.316931896	0.651	0.368	3.10E-31	8.53E-35	10.79753781	34.06895288	black
PRPF31	1.41E-35	0.594461881	0.179	0.058	3.19E-31	8.76E-35	20.24593236	34.05757883	black
SLC32A1	1.42E-35	0.987788909	0.137	0.036	3.21E-31	8.82E-35	33.63855754	34.05439891	black
TMEFF1	1.49E-35	0.361959113	0.352	0.164	3.36E-31	9.22E-35	12.31940257	34.03534306	black
PHAX	1.56E-35	0.54247882	0.198	0.069	3.52E-31	9.65E-35	18.45261678	34.01536818	black
TXNDC17	1.57E-35	0.6635543	0.135	0.033	3.55E-31	9.72E-35	22.56905368	34.01236899	black
X3110082I17RIK	1.60E-35	0.605179097	0.163	0.049	3.62E-31	9.92E-35	20.57827703	34.00361499	black
CMAS	1.62E-35	0.427978198	0.294	0.127	3.66E-31	1.00E-34	14.55086869	33.99908861	black
PPP1R9B	1.71E-35	0.435962652	0.215	0.078	3.87E-31	1.06E-34	14.81194339	33.97525757	black
BPNT1	1.74E-35	0.52889239	0.205	0.073	3.93E-31	1.07E-34	17.96585142	33.96882195	black
RANGAP1	1.86E-35	0.29929802	0.447	0.224	4.20E-31	1.15E-34	10.15841396	33.94079906	black
PTPRF	1.92E-35	0.332200701	0.459	0.232	4.33E-31	1.18E-34	11.27077239	33.92759962	black
MAP2K2	2.09E-35	0.297241469	0.549	0.289	4.72E-31	1.29E-34	10.07361068	33.89032737	black
GPI1	2.15E-35	0.304585029	0.542	0.29	4.85E-31	1.32E-34	10.31909077	33.87917921	black
CTNND2	2.20E-35	-0.313095045	0.992	0.975	4.97E-31	1.35E-34	10.60421485	33.86899611	black
SOGA1	2.21E-35	0.457253675	0.311	0.139	5.01E-31	1.36E-34	15.48534704	33.86598707	black
CHCHD4	2.28E-35	0.476765788	0.217	0.081	5.16E-31	1.40E-34	16.14008226	33.85327272	black
X2210016L21RIK	2.43E-35	0.304462014	0.411	0.199	5.50E-31	1.49E-34	10.29870592	33.82591404	black
JADE1	2.76E-35	0.453012546	0.273	0.115	6.24E-31	1.69E-34	15.2988208	33.77129601	black
FBXO2	2.77E-35	0.569453125	0.189	0.064	6.26E-31	1.70E-34	19.23036665	33.76988522	black
GM16168	2.85E-35	1.084980877	0.111	0.022	6.45E-31	1.75E-34	36.626122	33.75738943	red
SPINT2	2.87E-35	0.503066413	0.28	0.12	6.50E-31	1.76E-34	16.980756	33.75450155	black
MAP2	3.04E-35	-0.357239438	0.957	0.907	6.87E-31	1.86E-34	12.05000158	33.73088271	black
LSM3	3.19E-35	0.666575273	0.149	0.041	7.21E-31	1.95E-34	22.47017347	33.7098815	black
8-Sep	3.21E-35	0.345896038	0.376	0.179	7.27E-31	1.96E-34	11.65905543	33.70681985	black
PEX5L	3.25E-35	0.428493339	0.796	0.58	7.34E-31	1.98E-34	14.44134255	33.70260683	black
TEF	3.36E-35	0.327536943	0.559	0.304	7.59E-31	2.05E-34	11.03413338	33.68821016	black
CAMKK2	3.44E-35	0.277498594	0.408	0.197	7.76E-31	2.09E-34	9.345850669	33.67891175	black
DHDDS	3.55E-35	0.328254005	0.456	0.232	8.03E-31	2.16E-34	11.05059314	33.66476261	black
DAD1	3.63E-35	0.284663757	0.43	0.212	8.21E-31	2.21E-34	9.580387829	33.65510216	black
PHYHIPL	3.71E-35	0.366170174	0.431	0.217	8.38E-31	2.26E-34	12.32042651	33.64672328	black
TAF3	3.77E-35	0.377697874	0.47	0.248	8.53E-31	2.29E-34	12.70554752	33.63944676	black
ZFP846	3.89E-35	0.346974304	0.391	0.19	8.79E-31	2.36E-34	11.66751941	33.62646538	black
MRPS25	4.12E-35	0.618934733	0.163	0.049	9.31E-31	2.50E-34	20.79737861	33.60189289	black
GM42851	4.19E-35	0.711407722	0.15	0.043	9.47E-31	2.54E-34	23.89959437	33.59479188	black
MYO9B	4.37E-35	0.303946582	0.396	0.191	9.87E-31	2.65E-34	10.20567507	33.57719964	black
VPS37A	4.42E-35	0.358710375	0.39	0.187	9.99E-31	2.68E-34	12.04260547	33.57194636	black
SLC1A1	4.49E-35	0.337283844	0.459	0.236	1.01E-30	2.72E-34	11.32124461	33.56592613	black
A330015K06RIK	4.51E-35	0.930401354	0.116	0.025	1.02E-30	2.73E-34	31.2283041	33.56433648	black
RBMX	4.53E-35	0.434826706	0.261	0.107	1.02E-30	2.74E-34	14.59368335	33.5620677	black
TADA3	4.63E-35	0.61729648	0.16	0.048	1.05E-30	2.80E-34	20.71217346	33.55303995	black
RPL13A	4.75E-35	0.330233964	0.703	0.418	1.07E-30	2.87E-34	11.0769383	33.54269854	black
ERBB4	4.82E-35	-0.917627671	0.647	0.685	1.09E-30	2.91E-34	30.77344367	33.53587153	black
RPL36A	4.87E-35	0.328066418	0.36	0.168	1.10E-30	2.94E-34	11.00074119	33.53205503	black
ACTN1	4.97E-35	0.35104011	0.374	0.178	1.12E-30	2.99E-34	11.76818085	33.52374985	black
SSR2	5.12E-35	0.423461642	0.265	0.11	1.16E-30	3.08E-34	14.19074249	33.51128196	black
AP2S1	5.26E-35	0.520365259	0.228	0.087	1.19E-30	3.17E-34	17.43183872	33.49923619	black
BRK1	5.36E-35	0.449167312	0.291	0.127	1.21E-30	3.22E-34	15.04341265	33.4917797	black
RPL18	5.37E-35	0.373064862	0.346	0.16	1.21E-30	3.23E-34	12.49423657	33.49078896	black
SESN1	5.56E-35	0.301983972	0.562	0.306	1.26E-30	3.34E-34	10.10934035	33.47641363	black
RHOU	5.98E-35	0.668041394	0.132	0.033	1.35E-30	3.59E-34	22.34252403	33.4448198	black
DFFB	6.00E-35	0.45847368	0.242	0.096	1.36E-30	3.60E-34	15.33322072	33.44405883	black
SHOX2	6.94E-35	0.592731641	0.21	0.077	1.57E-30	4.16E-34	19.78600076	33.38104362	black
FAM155A	7.12E-35	-0.253631438	0.997	0.993	1.61E-30	4.26E-34	8.463727069	33.37018135	black
DHPS	7.40E-35	0.423806726	0.252	0.101	1.67E-30	4.43E-34	14.13562769	33.35394846	black
DNAJB4	7.40E-35	0.308714328	0.434	0.216	1.67E-30	4.43E-34	10.29684179	33.35394846	black
ARHGEF10	7.58E-35	0.825330154	0.13	0.032	1.71E-30	4.53E-34	27.51982897	33.34402463	black
CLIP3	9.10E-35	0.359705084	0.35	0.161	2.06E-30	5.44E-34	11.96544339	33.26459349	black
MVB12B	9.34E-35	0.338711389	0.453	0.231	2.11E-30	5.58E-34	11.26336053	33.25356306	black
MLF2	9.57E-35	0.342048195	0.439	0.222	2.16E-30	5.71E-34	11.37091941	33.24361767	black
ANKRD12	9.85E-35	0.298906156	0.935	0.715	2.23E-30	5.87E-34	9.933022817	33.231242	black
CLASRP	9.88E-35	0.285705196	0.608	0.341	2.23E-30	5.88E-34	9.49409149	33.23037738	black
H13	9.89E-35	0.334179832	0.469	0.242	2.23E-30	5.89E-34	11.10487925	33.23024968	black
ANXA7	1.02E-34	0.407913725	0.267	0.111	2.31E-30	6.09E-34	13.5491409	33.2157024	black
SPAG7	1.04E-34	0.650309895	0.152	0.043	2.36E-30	6.21E-34	21.59480727	33.2069486	black
RAB43	1.14E-34	0.443326312	0.251	0.103	2.58E-30	6.78E-34	14.70467004	33.16895393	black
NSG1	1.22E-34	0.360347751	0.711	0.434	2.75E-30	7.22E-34	11.94251105	33.14162783	black
EIF3F	1.22E-34	0.483095921	0.234	0.092	2.76E-30	7.24E-34	16.00985687	33.14012016	black
X4930509H03RIK	1.30E-34	0.637868134	0.164	0.05	2.94E-30	7.72E-34	21.12137229	33.11244311	black
H2AFZ	1.38E-34	0.398498725	0.348	0.164	3.11E-30	8.16E-34	13.18575406	33.08857274	black
GMIP	1.44E-34	0.411114233	0.264	0.109	3.26E-30	8.55E-34	13.59484139	33.06828199	black
TUSC3	1.50E-34	0.358160736	0.711	0.431	3.40E-30	8.90E-34	11.83735563	33.05040015	black
UBA2	1.52E-34	0.34674322	0.353	0.165	3.44E-30	9.01E-34	11.45830074	33.04549325	black
AURKAIP1	1.55E-34	0.488752751	0.189	0.064	3.51E-30	9.17E-34	16.14712183	33.03740344	black
ERO1LB	1.63E-34	0.460413332	0.234	0.092	3.69E-30	9.63E-34	15.20113221	33.01627291	black
LIG3	1.64E-34	0.548782443	0.178	0.059	3.70E-30	9.67E-34	18.11776284	33.01447242	black
BSDC1	1.66E-34	0.471641029	0.247	0.1	3.76E-30	9.80E-34	15.56834803	33.00889249	black
ANKRD13A	1.70E-34	0.391763688	0.322	0.147	3.85E-30	1.00E-33	12.92739373	32.99793762	black
SLC44A1	1.74E-34	0.360414443	0.622	0.36	3.92E-30	1.02E-33	11.89025263	32.99049989	black
SPOUT1	1.74E-34	0.496547373	0.261	0.11	3.93E-30	1.02E-33	16.38096216	32.98972678	black
STXBP1	1.89E-34	0.365719176	0.816	0.532	4.27E-30	1.11E-33	12.05214947	32.95465557	black
CLIC4	2.00E-34	0.892755293	0.103	0.019	4.52E-30	1.17E-33	29.39864874	32.930243	black
DBP	2.07E-34	0.529657869	0.194	0.068	4.68E-30	1.22E-33	17.43355686	32.91475096	black
MOB4	2.13E-34	0.388507183	0.35	0.165	4.81E-30	1.25E-33	12.78336763	32.90381279	black
XPR1	2.22E-34	0.340000104	0.743	0.461	5.01E-30	1.30E-33	11.18114007	32.88569605	black
X4932438A13RIK	2.36E-34	-0.677833582	0.73	0.677	5.33E-30	1.38E-33	22.2730468	32.8591669	black
ID2	2.38E-34	0.797149458	0.128	0.031	5.37E-30	1.39E-33	26.19151025	32.85646121	black
PSMC2	2.46E-34	0.442253573	0.254	0.105	5.57E-30	1.44E-33	14.52391634	32.84069871	black
GLMN	2.50E-34	0.287872322	0.421	0.208	5.64E-30	1.46E-33	9.452484122	32.83568231	black
MAP3K10	2.52E-34	0.519229776	0.216	0.081	5.69E-30	1.47E-33	17.04762058	32.83251724	black
NXT1	2.87E-34	0.777643649	0.101	0.018	6.49E-30	1.68E-33	25.48744825	32.77522844	black
PIP5K1B	2.94E-34	0.341174782	0.555	0.318	6.64E-30	1.72E-33	11.17877641	32.76554127	black
ABCG1	3.01E-34	0.418689912	0.267	0.112	6.80E-30	1.76E-33	13.71443433	32.75558818	black
NARS	3.12E-34	0.349346644	0.363	0.173	7.05E-30	1.82E-33	11.43761297	32.74001103	black
UBASH3B	3.14E-34	0.384417146	0.392	0.196	7.11E-30	1.83E-33	12.58466202	32.7369946	black
NELFE	3.24E-34	0.666431638	0.144	0.04	7.33E-30	1.89E-33	21.80809884	32.72368476	black
MBD5	3.27E-34	-0.398214788	0.927	0.862	7.39E-30	1.90E-33	13.0297894	32.72050614	black
TMEM9B	3.37E-34	0.399775224	0.329	0.152	7.62E-30	1.96E-33	13.07565795	32.70752452	black
RNF8	3.52E-34	0.354501235	0.301	0.132	7.96E-30	2.05E-33	11.58833513	32.68912489	black
PHF6	3.58E-34	0.294222416	0.402	0.2	8.09E-30	2.08E-33	9.615854906	32.68226482	black
ARID4A	3.81E-34	0.31893253	0.502	0.265	8.62E-30	2.21E-33	10.41477348	32.6550994	black
CBLL1	3.88E-34	0.479029095	0.216	0.081	8.76E-30	2.25E-33	15.63944674	32.64821889	black
VASH1	4.07E-34	0.638329516	0.141	0.038	9.20E-30	2.36E-33	20.8268234	32.62707249	black
PLA2G3	4.14E-34	0.690929614	0.16	0.049	9.36E-30	2.40E-33	22.53815494	32.62004475	black
REXO1	4.15E-34	0.401464175	0.233	0.091	9.37E-30	2.40E-33	13.09565451	32.6197338	black
MTUS1	4.31E-34	0.493946121	0.274	0.119	9.74E-30	2.49E-33	16.10430575	32.60336516	black
NTNG2	4.43E-34	0.765357279	0.284	0.134	1.00E-29	2.56E-33	24.94412659	32.59148017	black
DNAJA3	4.57E-34	0.417173925	0.243	0.098	1.03E-29	2.64E-33	13.59101994	32.57878576	black
PSMA6	4.74E-34	0.59470988	0.211	0.079	1.07E-29	2.74E-33	19.36512544	32.56230657	black
ADCY3	4.83E-34	0.296143045	0.389	0.188	1.09E-29	2.79E-33	9.640984641	32.5551615	black
GM16196	5.07E-34	-1.549301231	0.03	0.117	1.15E-29	2.93E-33	50.40460993	32.53377001	blue
SMG5	5.25E-34	0.275826875	0.421	0.208	1.19E-29	3.02E-33	8.969691586	32.51928077	black
SAP130	5.28E-34	0.344334697	0.476	0.249	1.19E-29	3.04E-33	11.19689714	32.51748154	black
NUCB2	5.28E-34	0.616563338	0.173	0.057	1.19E-29	3.04E-33	20.04908696	32.51748154	black
HIKESHI	5.63E-34	0.540206238	0.203	0.075	1.27E-29	3.24E-33	17.55100641	32.4894553	black
CUX1	5.66E-34	0.333557543	0.725	0.443	1.28E-29	3.25E-33	10.83663078	32.48803998	black
MEAF6	6.34E-34	0.367900525	0.343	0.161	1.43E-29	3.64E-33	11.93432783	32.43900735	black
ACO2	6.81E-34	0.246731446	0.524	0.277	1.54E-29	3.91E-33	7.996102103	32.40811917	black
SGTB	7.25E-34	0.452211744	0.227	0.089	1.64E-29	4.16E-33	14.64311712	32.38110758	black
CRBN	7.45E-34	0.471281848	0.235	0.094	1.68E-29	4.27E-33	15.255269	32.36973599	black
KCNIP2	7.46E-34	0.549620461	0.202	0.074	1.69E-29	4.27E-33	17.79075555	32.3691653	black
SCFD1	7.84E-34	0.315327707	0.507	0.27	1.77E-29	4.49E-33	10.20021139	32.34797059	black
MAT2B	7.87E-34	0.66536788	0.155	0.047	1.78E-29	4.50E-33	21.52226657	32.34641647	black
GAS5	8.43E-34	-0.959697448	0.475	0.507	1.90E-29	4.82E-33	31.01472536	32.31719063	black
WDR47	8.53E-34	0.242224527	0.556	0.298	1.93E-29	4.87E-33	7.826803253	32.31218304	black
RASSF1	8.54E-34	0.478645467	0.199	0.072	1.93E-29	4.88E-33	15.46589621	32.31179919	black
RPL7A	8.78E-34	0.395538466	0.291	0.129	1.98E-29	5.01E-33	12.7759593	32.30016903	black
GSG1L	8.84E-34	0.484535798	0.255	0.108	2.00E-29	5.04E-33	15.64918397	32.29727095	black
UQCRC1	8.93E-34	0.323054853	0.424	0.214	2.02E-29	5.09E-33	10.43248268	32.29322381	black
UBE4B	8.96E-34	0.297791494	0.568	0.316	2.03E-29	5.10E-33	9.616302142	32.29206458	black
UFD1	9.36E-34	0.352099049	0.36	0.171	2.12E-29	5.33E-33	11.36349836	32.27358434	black
SEM1	9.86E-34	0.35467575	0.326	0.15	2.23E-29	5.61E-33	11.4386855	32.25110683	black
ST13	9.87E-34	0.312467467	0.467	0.242	2.23E-29	5.61E-33	10.07742164	32.25110683	black
ATP2B2	1.01E-33	0.360779119	0.849	0.609	2.28E-29	5.74E-33	11.63187298	32.24098171	black
TMEM184B	1.07E-33	0.4032918	0.266	0.113	2.43E-29	6.09E-33	12.99211539	32.2151737	black
POLR2F	1.11E-33	0.627531497	0.159	0.048	2.52E-29	6.32E-33	20.20612201	32.199375	black
CAMTA1	1.12E-33	0.256774455	0.972	0.857	2.53E-29	6.35E-33	8.267369345	32.19700863	black
DUS2	1.22E-33	0.36153502	0.257	0.107	2.77E-29	6.94E-33	11.62648258	32.1586622	black
HIP1	1.25E-33	0.36597687	0.378	0.186	2.82E-29	7.07E-33	11.7663649	32.15056979	black
ITCH	1.30E-33	0.340424436	0.731	0.457	2.93E-29	7.33E-33	10.93941866	32.13464581	black
NRIP1	1.31E-33	0.372793358	0.375	0.186	2.95E-29	7.39E-33	11.97838073	32.13142207	black
CIRBP	1.38E-33	0.445368371	0.261	0.111	3.12E-29	7.79E-33	14.30004777	32.10835949	black
PCP4L1	1.40E-33	0.62108628	0.17	0.055	3.17E-29	7.92E-33	19.93782438	32.10153728	black
MICAL3	1.41E-33	0.341899413	0.812	0.541	3.19E-29	7.97E-33	10.97454909	32.0987655	black
PDE10A	1.43E-33	0.502275958	0.858	0.667	3.24E-29	8.09E-33	16.11902362	32.09196731	black
YIPF1	1.57E-33	0.422130358	0.276	0.119	3.55E-29	8.84E-33	13.53070703	32.05338533	black
CIAPIN1	1.57E-33	0.421040411	0.255	0.106	3.55E-29	8.85E-33	13.49569931	32.05321621	black
ENSA	1.61E-33	0.412151251	0.284	0.124	3.63E-29	9.05E-33	13.20663319	32.04317143	black
TUBB5	1.69E-33	0.306479565	0.412	0.205	3.81E-29	9.49E-33	9.81427204	32.0225984	black
SYNJ1	1.78E-33	0.283952444	0.624	0.343	4.02E-29	1.00E-32	9.086484404	32.00002179	black
UBR7	1.81E-33	0.530786101	0.194	0.069	4.08E-29	1.02E-32	16.98166809	31.9934302	black
FAAP100	1.82E-33	0.55595816	0.174	0.057	4.12E-29	1.02E-32	17.7852612	31.9902872	black
INTS9	1.85E-33	0.390594177	0.285	0.125	4.18E-29	1.04E-32	12.4926797	31.98378373	black
DEXI	1.87E-33	0.34554208	0.331	0.155	4.23E-29	1.05E-32	11.05007709	31.97896208	black
GM2164	1.91E-33	0.769081609	0.2	0.076	4.31E-29	1.07E-32	24.58854387	31.97130652	black
TIAM1	1.92E-33	0.325263032	0.51	0.28	4.34E-29	1.08E-32	10.3980426	31.96810455	black
GOLGA5	1.98E-33	0.360442827	0.305	0.136	4.47E-29	1.11E-32	11.51828104	31.9559169	black
GM32036	2.02E-33	0.779375739	0.12	0.028	4.56E-29	1.13E-32	24.89940228	31.94787961	black
RRBP1	2.04E-33	0.391090961	0.262	0.11	4.60E-29	1.14E-32	12.49288711	31.94368662	black
CFAP36	2.07E-33	0.296773991	0.51	0.273	4.69E-29	1.16E-32	9.477724599	31.93583297	black
RTL8B	2.08E-33	0.541430617	0.21	0.08	4.69E-29	1.16E-32	17.29103775	31.93583297	black
WDTC1	2.08E-33	0.525133846	0.191	0.068	4.70E-29	1.16E-32	16.77025505	31.93520122	black
SNRPD2	2.10E-33	0.464030625	0.228	0.089	4.75E-29	1.17E-32	14.81681733	31.93068849	black
GTF2H5	2.13E-33	0.411413638	0.224	0.087	4.82E-29	1.19E-32	13.13428046	31.92475707	black
CMC2	2.16E-33	0.652596508	0.145	0.042	4.88E-29	1.20E-32	20.83070622	31.9197329	black
ATG7	2.19E-33	0.583873089	0.179	0.061	4.95E-29	1.22E-32	18.63354524	31.91369084	black
TMEM258	2.29E-33	0.48444275	0.221	0.086	5.17E-29	1.27E-32	15.45141423	31.89523267	black
MED6	2.38E-33	0.356829718	0.301	0.134	5.39E-29	1.32E-32	11.37495277	31.87781793	black
HSPH1	2.42E-33	0.44195705	0.268	0.116	5.48E-29	1.35E-32	14.08558441	31.87093502	black
ID4	2.45E-33	0.544028217	0.205	0.077	5.53E-29	1.36E-32	17.33662236	31.86713818	black
LSM1	2.45E-33	0.407866571	0.27	0.116	5.53E-29	1.36E-32	12.99749175	31.86701896	black
MMEL1	2.53E-33	-1.608513662	0.034	0.12	5.71E-29	1.40E-32	51.2367177	31.85345509	blue
PBX4	2.56E-33	0.336648624	0.356	0.17	5.78E-29	1.42E-32	10.72188417	31.84888757	black
GM11417	2.59E-33	0.645148546	0.161	0.051	5.85E-29	1.43E-32	20.54390384	31.84367996	black
EIF4G3	2.63E-33	0.306839199	0.811	0.531	5.95E-29	1.46E-32	9.768725467	31.8366281	black
SAMD15	2.66E-33	0.687597076	0.114	0.025	6.02E-29	1.47E-32	21.88736852	31.83167771	black
TMCC3	2.77E-33	0.555315985	0.355	0.182	6.27E-29	1.53E-32	17.66719579	31.81467176	black
CSNK2B	2.84E-33	0.600410836	0.157	0.048	6.41E-29	1.57E-32	19.09593937	31.80478804	black
TMEM184C	2.85E-33	0.391044113	0.247	0.102	6.43E-29	1.57E-32	12.43662743	31.80364315	black
RPS10	3.06E-33	0.341077692	0.405	0.205	6.91E-29	1.69E-32	10.83701437	31.77286183	black
MICU2	3.41E-33	0.359124403	0.429	0.222	7.71E-29	1.88E-32	11.39347753	31.72571245	black
NDUFA9	3.45E-33	0.493371963	0.221	0.086	7.81E-29	1.90E-32	15.64994989	31.7203876	black
PSMC3	3.64E-33	0.416679261	0.272	0.118	8.22E-29	2.00E-32	13.20812203	31.69853476	black
SLC43A2	3.67E-33	0.34148648	0.337	0.158	8.31E-29	2.02E-32	10.82310266	31.69408829	black
FNTB	3.75E-33	0.404318115	0.272	0.118	8.48E-29	2.06E-32	12.81102176	31.68550034	black
SUCLG1	3.75E-33	0.315490778	0.411	0.208	8.48E-29	2.06E-32	9.996483159	31.68550034	black
PTPA	3.99E-33	0.276305845	0.486	0.254	9.01E-29	2.19E-32	8.747711832	31.65952507	black
ARL2BP	4.12E-33	0.398956405	0.307	0.14	9.31E-29	2.26E-32	12.62526368	31.64572248	black
CCDC173	4.21E-33	0.562187971	0.171	0.057	9.52E-29	2.31E-32	17.78559304	31.63638133	black
EDF1	4.28E-33	0.340431852	0.291	0.129	9.68E-29	2.35E-32	10.76761419	31.62927943	black
UROS	4.35E-33	0.592608808	0.155	0.047	9.82E-29	2.38E-32	18.74015779	31.62315093	black
MAGT1	4.64E-33	0.52548056	0.173	0.057	1.05E-28	2.54E-32	16.60270999	31.59528867	black
NDEL1	4.90E-33	0.368621139	0.328	0.153	1.11E-28	2.68E-32	11.63798842	31.57167935	black
STARD5	5.08E-33	0.494066714	0.291	0.133	1.15E-28	2.78E-32	15.59076328	31.555988	black
RNF170	5.20E-33	0.31990993	0.386	0.19	1.17E-28	2.84E-32	10.09206333	31.54657728	black
PFN1	5.24E-33	0.473754724	0.234	0.095	1.18E-28	2.86E-32	14.94385123	31.54343475	black
ANAPC5	5.26E-33	0.26864493	0.557	0.307	1.19E-28	2.87E-32	8.47351658	31.5416955	black
KIF1A	5.47E-33	0.316550191	0.751	0.471	1.24E-28	2.99E-32	9.979224948	31.52493735	black
MAN1B1	5.76E-33	0.328248373	0.378	0.185	1.30E-28	3.14E-32	10.34073488	31.50277577	black
SIGMAR1	5.78E-33	0.454772717	0.211	0.081	1.31E-28	3.15E-32	14.32612479	31.50172439	black
GOLGA7	5.91E-33	0.564412165	0.163	0.052	1.34E-28	3.22E-32	17.77471898	31.49244486	black
TBC1D22A	6.15E-33	0.541470076	0.18	0.062	1.39E-28	3.35E-32	17.04287807	31.47519837	black
MMP16	6.51E-33	-0.569619148	0.812	0.766	1.47E-28	3.54E-32	17.91489044	31.45064648	black
UBXN2A	6.57E-33	0.373204206	0.245	0.101	1.48E-28	3.57E-32	11.73629102	31.44737075	black
TBK1	6.58E-33	0.328395732	0.312	0.142	1.49E-28	3.57E-32	10.32698975	31.44678428	black
RAB12	6.63E-33	0.276495674	0.373	0.181	1.50E-28	3.60E-32	8.694136606	31.444024	black
GMPR2	7.10E-33	0.555275298	0.165	0.053	1.60E-28	3.85E-32	17.44362955	31.41438057	black
ABLIM3	7.22E-33	0.320081879	0.48	0.255	1.63E-28	3.92E-32	10.05280099	31.40696692	black
UNC50	7.39E-33	0.488052725	0.225	0.089	1.67E-28	4.00E-32	15.32364223	31.39751395	black
LASP1	7.70E-33	0.402723496	0.228	0.09	1.74E-28	4.17E-32	12.63736055	31.37974489	black
VPS35L	7.92E-33	0.314926893	0.477	0.252	1.79E-28	4.29E-32	9.878505092	31.36761361	black
DDX5	8.75E-33	0.31863401	0.768	0.486	1.98E-28	4.73E-32	9.981196338	31.32495601	black
SLC48A1	9.04E-33	0.399856883	0.312	0.144	2.04E-28	4.89E-32	12.51996245	31.31110904	black
RPS24	9.37E-33	0.248516128	0.588	0.322	2.12E-28	5.06E-32	7.777495337	31.29573684	black
STAM2	9.59E-33	0.416361904	0.237	0.096	2.17E-28	5.18E-32	13.02617824	31.28571112	black
7-Sep	9.76E-33	0.390651178	0.636	0.38	2.21E-28	5.27E-32	12.21894571	31.27840484	black
UTP3	1.02E-32	0.597071162	0.142	0.041	2.30E-28	5.49E-32	18.6648083	31.26060926	black
SLC8A1	1.03E-32	-0.480806165	0.907	0.865	2.32E-28	5.53E-32	15.02873773	31.25737317	black
E230016M11RIK	1.19E-32	0.320632633	0.456	0.242	2.69E-28	6.40E-32	10.00174435	31.19378163	black
SPRED2	1.19E-32	0.329944921	0.449	0.237	2.69E-28	6.40E-32	10.2922294	31.19378035	black
LAMTOR2	1.20E-32	0.371525978	0.27	0.116	2.71E-28	6.46E-32	11.5878152	31.1897845	black
PRPF18	1.44E-32	0.357177073	0.28	0.122	3.25E-28	7.72E-32	11.11261386	31.11233814	black
MRPL23	1.45E-32	0.572755896	0.201	0.076	3.29E-28	7.81E-32	17.81696102	31.10742492	black
SAE1	1.47E-32	0.340238298	0.354	0.169	3.31E-28	7.87E-32	10.58274558	31.10392225	black
ARXES1	1.53E-32	0.475600416	0.216	0.084	3.45E-28	8.19E-32	14.78484737	31.0866998	black
E130308A19RIK	1.53E-32	0.31175891	0.546	0.302	3.45E-28	8.20E-32	9.691459208	31.08639047	black
RBM4	1.56E-32	0.35483957	0.306	0.14	3.52E-28	8.34E-32	11.02791498	31.07859414	black
PLS1	1.64E-32	0.481551655	0.223	0.09	3.71E-28	8.80E-32	14.95480466	31.05545275	black
REPS2	1.65E-32	0.337694664	0.554	0.313	3.73E-28	8.83E-32	10.48681513	31.05413334	black
ORC2	1.79E-32	0.328579451	0.393	0.198	4.05E-28	9.60E-32	10.19184533	31.01790234	black
DHX30	1.86E-32	0.304433301	0.692	0.409	4.20E-28	9.94E-32	9.438169373	31.00242107	black
CCT8	1.93E-32	0.446175806	0.263	0.113	4.37E-28	1.03E-31	13.82526117	30.98612922	black
RNF13	2.11E-32	0.321847717	0.459	0.242	4.77E-28	1.13E-31	9.960526974	30.94794979	black
SAT2	2.12E-32	0.510840179	0.181	0.063	4.79E-28	1.13E-31	15.80862911	30.94633071	black
ATOX1	2.21E-32	0.507181009	0.182	0.063	4.99E-28	1.18E-31	15.68641888	30.92864007	black
SSU72	2.44E-32	0.428183612	0.253	0.107	5.51E-28	1.30E-31	13.22487748	30.88599639	black
BCL2	2.46E-32	0.326054281	0.393	0.201	5.55E-28	1.31E-31	10.0696341	30.88330588	black
HMGCS1	2.57E-32	0.383927557	0.294	0.132	5.81E-28	1.37E-31	11.84955609	30.8640416	black
POLDIP3	2.63E-32	0.500375137	0.213	0.083	5.94E-28	1.40E-31	15.43869246	30.85423581	black
ZFP273	2.73E-32	0.666881289	0.124	0.031	6.17E-28	1.45E-31	20.56531461	30.83804414	black
KCNJ3	2.86E-32	-0.646654649	0.751	0.714	6.47E-28	1.52E-31	19.92855536	30.81792638	black
IDH3A	2.89E-32	0.421753049	0.231	0.094	6.53E-28	1.53E-31	12.99605708	30.81437615	black
RTL8A	2.89E-32	0.357887897	0.458	0.241	6.54E-28	1.54E-31	11.027763	30.81345608	black
CLCC1	3.01E-32	0.564008205	0.199	0.074	6.81E-28	1.60E-31	17.36925828	30.79610922	black
SQLE	3.05E-32	0.510087671	0.205	0.078	6.89E-28	1.62E-31	15.70641125	30.79159159	black
THOC3	3.10E-32	0.673793121	0.139	0.039	7.02E-28	1.64E-31	20.74201641	30.78395397	black
PDE6D	3.19E-32	0.39421351	0.232	0.095	7.21E-28	1.69E-31	12.13085336	30.77229229	black
NOP10	3.21E-32	0.414116251	0.298	0.136	7.27E-28	1.70E-31	12.74205761	30.76927695	black
RAB11B	3.34E-32	0.415417137	0.226	0.09	7.54E-28	1.77E-31	12.77541749	30.75322692	black
NTN3	3.41E-32	0.643047288	0.123	0.031	7.70E-28	1.80E-31	19.77031224	30.74472534	black
SEMA6D	3.76E-32	-0.989336332	0.463	0.543	8.49E-28	1.99E-31	30.37476507	30.70216275	black
THAP2	3.89E-32	0.271112731	0.394	0.195	8.79E-28	2.05E-31	8.319829237	30.68771134	black
PLEKHM3	3.96E-32	0.320401686	0.51	0.278	8.95E-28	2.09E-31	9.82990937	30.67995517	black
NDUFAF2	4.07E-32	0.334923928	0.35	0.17	9.19E-28	2.14E-31	10.27166501	30.66865087	black
WARS	4.22E-32	0.561576359	0.182	0.065	9.54E-28	2.22E-31	17.21387359	30.65277468	black
SGMS1	4.33E-32	0.297233928	0.62	0.355	9.79E-28	2.28E-31	9.107752766	30.64169969	black
DELE1	4.46E-32	0.437704118	0.19	0.068	1.01E-27	2.35E-31	13.40650774	30.62915605	black
NGEF	4.66E-32	0.38790987	0.271	0.12	1.05E-27	2.45E-31	11.87399707	30.61019577	black
GGPS1	4.75E-32	0.298471531	0.599	0.343	1.07E-27	2.50E-31	9.133880045	30.6021818	black
PPP1R10	4.79E-32	0.436066694	0.245	0.102	1.08E-27	2.51E-31	13.34341917	30.59949169	black
DIPK1B	4.95E-32	0.316832635	0.389	0.195	1.12E-27	2.60E-31	9.690288159	30.58488016	black
WDR60	5.10E-32	0.257838243	0.36	0.173	1.15E-27	2.68E-31	7.882785747	30.57260107	black
STK10	5.16E-32	0.584862008	0.169	0.057	1.17E-27	2.70E-31	17.87805889	30.5679949	black
SH3GL3	5.30E-32	0.354381669	0.289	0.13	1.20E-27	2.78E-31	10.82864293	30.55644203	black
ARL1	5.40E-32	0.448833941	0.221	0.088	1.22E-27	2.83E-31	13.711074	30.54821112	black
SLC25A38	5.43E-32	0.670706202	0.118	0.029	1.23E-27	2.84E-31	20.48737211	30.54597089	black
STK4	5.44E-32	0.36089994	0.248	0.103	1.23E-27	2.85E-31	11.02389427	30.54556965	black
RARB	5.50E-32	0.729098429	0.253	0.115	1.24E-27	2.88E-31	22.26755109	30.54121393	black
TMEM39B	5.61E-32	0.43107909	0.21	0.081	1.27E-27	2.93E-31	13.16222323	30.53319804	black
AKIRIN1	6.06E-32	0.432849962	0.236	0.098	1.37E-27	3.17E-31	13.20172669	30.49954455	black
WDR34	6.11E-32	0.331056401	0.242	0.099	1.38E-27	3.19E-31	10.09599523	30.49629971	black
PDZD11	6.16E-32	0.67460724	0.11	0.024	1.39E-27	3.22E-31	20.57067489	30.49281667	black
NDUFS7	6.19E-32	0.287107164	0.414	0.208	1.40E-27	3.23E-31	8.754235885	30.49117887	black
GM15738	6.68E-32	0.526419352	0.194	0.072	1.51E-27	3.48E-31	16.03389534	30.45840786	black
SUSD4	6.77E-32	0.271854941	0.63	0.364	1.53E-27	3.52E-31	8.278771616	30.45290106	black
PFKM	7.09E-32	0.338593253	0.339	0.16	1.60E-27	3.69E-31	10.30441794	30.43302799	black
PSMB4	7.27E-32	0.422160522	0.258	0.111	1.64E-27	3.78E-31	12.84315052	30.42243375	black
DNAJB12	7.32E-32	0.563000821	0.171	0.058	1.65E-27	3.80E-31	17.12636725	30.4197909	black
KCNH7	7.55E-32	-0.490580261	0.894	0.863	1.71E-27	3.92E-31	14.91674084	30.40632087	black
RPP21	7.86E-32	0.346798144	0.289	0.131	1.78E-27	4.08E-31	10.53899923	30.38943378	black
GLRX	7.98E-32	0.696589948	0.124	0.032	1.80E-27	4.14E-31	21.16454305	30.38307273	black
TMCO3	8.33E-32	0.367796376	0.279	0.123	1.88E-27	4.32E-31	11.16796226	30.36452502	black
GOLGB1	8.46E-32	0.278536695	0.706	0.422	1.91E-27	4.39E-31	8.455792852	30.35791336	black
LIMK1	8.89E-32	0.369758891	0.338	0.162	2.01E-27	4.60E-31	11.21729324	30.33677762	black
ZCCHC18	8.98E-32	0.309268605	0.824	0.557	2.03E-27	4.65E-31	9.380853443	30.33238196	black
TEX2	9.08E-32	0.33441691	0.365	0.177	2.05E-27	4.70E-31	10.14213887	30.32782905	black
STRIP2	9.45E-32	0.688716527	0.195	0.075	2.14E-27	4.89E-31	20.87563701	30.31092793	black
MAP6D1	9.66E-32	0.692469873	0.11	0.025	2.18E-27	4.99E-31	20.98294731	30.3016032	black
CAPN2	9.73E-32	0.329005145	0.384	0.194	2.20E-27	5.03E-31	9.968439626	30.29873474	black
ST3GAL2	1.01E-31	0.48283144	0.198	0.074	2.29E-27	5.23E-31	14.62088364	30.28154848	black
IFT140	1.02E-31	0.407967959	0.234	0.097	2.31E-27	5.28E-31	12.35217179	30.27730861	black
NSD1	1.03E-31	-0.541283331	0.794	0.726	2.32E-27	5.30E-31	16.38791802	30.27604415	black
BET1L	1.03E-31	0.505509882	0.18	0.064	2.33E-27	5.31E-31	15.30430341	30.27498362	black
MRPL18	1.07E-31	0.61795263	0.146	0.044	2.42E-27	5.51E-31	18.69872069	30.25914897	black
PIGX	1.10E-31	0.460587201	0.197	0.073	2.49E-27	5.67E-31	13.93113451	30.24646466	black
TPBG	1.10E-31	0.923346022	0.164	0.057	2.50E-27	5.68E-31	27.92703986	30.24547589	black
TMOD3	1.15E-31	0.233407594	0.396	0.197	2.59E-27	5.89E-31	7.055846044	30.22971924	black
GRM7	1.17E-31	-0.378924099	0.966	0.946	2.63E-27	5.99E-31	11.45210635	30.22269206	black
POR	1.17E-31	0.294150743	0.399	0.2	2.64E-27	6.01E-31	8.889623638	30.22131967	black
X1700010K24RIK	1.19E-31	0.666874447	0.123	0.032	2.68E-27	6.09E-31	20.14994298	30.21549718	black
FGFR1OP	1.36E-31	0.381928527	0.235	0.096	3.08E-27	6.99E-31	11.5173082	30.15566368	black
SNRPC	1.40E-31	0.521030504	0.176	0.061	3.17E-27	7.18E-31	15.70580207	30.14372855	black
CKLF	1.55E-31	0.720023954	0.123	0.032	3.50E-27	7.92E-31	21.67346134	30.10102817	black
CERK	1.61E-31	0.306085653	0.351	0.17	3.65E-27	8.27E-31	9.207844813	30.08257566	black
REEP5	1.67E-31	0.266088097	0.655	0.384	3.77E-27	8.53E-31	8.001039356	30.06913672	black
GM44644	1.74E-31	0.326306687	0.412	0.216	3.93E-27	8.90E-31	9.805695093	30.05054904	black
X5330439K02RIK	1.84E-31	0.526623824	0.189	0.07	4.16E-27	9.41E-31	15.81271794	30.02659053	black
SNU13	1.86E-31	0.424901695	0.246	0.104	4.20E-27	9.49E-31	12.75676673	30.02286618	black
MRPL43	1.92E-31	0.466951473	0.193	0.072	4.35E-27	9.81E-31	14.0123566	30.00816448	black
ZFP780B	1.94E-31	0.489924913	0.208	0.081	4.40E-27	9.92E-31	14.69939889	30.00337089	black
CCT3	2.00E-31	0.296266588	0.336	0.159	4.52E-27	1.02E-30	8.885407128	29.99125613	black
OS9	2.01E-31	0.252730146	0.39	0.193	4.55E-27	1.03E-30	7.579173172	29.98919313	black
GNAZ	2.04E-31	0.416509297	0.23	0.095	4.61E-27	1.04E-30	12.48857993	29.98391634	black
SIRPA	2.17E-31	0.289044086	0.479	0.255	4.90E-27	1.10E-30	8.659005673	29.95738744	black
MIEF1	2.20E-31	0.430031143	0.207	0.081	4.97E-27	1.12E-30	12.87983849	29.95094352	black
ADPRH	2.23E-31	0.359641174	0.279	0.125	5.04E-27	1.13E-30	10.76962438	29.94547107	black
NAXE	2.32E-31	0.464328362	0.238	0.1	5.25E-27	1.18E-30	13.89634489	29.92783993	black
PSMD5	2.45E-31	0.409663626	0.242	0.102	5.54E-27	1.25E-30	12.2508699	29.90470503	black
NPC2	2.71E-31	0.599918465	0.157	0.051	6.13E-27	1.38E-30	17.91417342	29.86101359	black
MAF	2.75E-31	0.480229353	0.241	0.106	6.21E-27	1.39E-30	14.33757267	29.85567748	black
PNRC1	2.77E-31	0.408598265	0.222	0.089	6.27E-27	1.41E-30	12.19751469	29.85209614	black
HSPA14	2.78E-31	0.394449725	0.238	0.099	6.27E-27	1.41E-30	11.77506034	29.85186605	black
ZFP941	2.97E-31	0.388848094	0.308	0.144	6.72E-27	1.51E-30	11.59633731	29.82228149	black
RALBP1	3.03E-31	0.274880529	0.446	0.234	6.85E-27	1.53E-30	8.195283519	29.81398341	black
SETD5	3.09E-31	-0.641093329	0.718	0.666	6.98E-27	1.56E-30	19.10871716	29.80645141	black
HIVEP2	3.14E-31	0.293003388	0.919	0.719	7.10E-27	1.59E-30	8.731335657	29.79943579	black
TUBA1B	3.15E-31	0.230374706	0.675	0.389	7.12E-27	1.59E-30	6.86476951	29.79827793	black
FBXW8	3.24E-31	0.303707492	0.324	0.155	7.33E-27	1.64E-30	9.046201941	29.78590318	black
GRIK3	3.36E-31	0.531733043	0.306	0.149	7.59E-27	1.69E-30	15.83027915	29.77110294	black
RBM25	3.47E-31	-0.528140601	0.831	0.754	7.84E-27	1.75E-30	15.71602124	29.75726771	black
ZFP961	3.55E-31	0.426306531	0.232	0.096	8.03E-27	1.79E-30	12.68141219	29.74716845	black
OCIAD2	3.64E-31	0.501115707	0.238	0.101	8.22E-27	1.83E-30	14.90162832	29.73690129	black
CCDC25	3.78E-31	0.49170671	0.172	0.06	8.54E-27	1.90E-30	14.61396274	29.72089343	black
SEMA4D	4.00E-31	0.308045501	0.373	0.186	9.04E-27	2.01E-30	9.147818867	29.69632354	black
FMN1	4.05E-31	0.28611665	0.419	0.219	9.15E-27	2.04E-30	8.495161018	29.69125016	black
OXA1L	4.11E-31	0.346944749	0.282	0.127	9.28E-27	2.06E-30	10.2991813	29.68536444	black
PRKAA2	4.26E-31	0.248231399	0.357	0.172	9.62E-27	2.14E-30	7.364993726	29.66987155	black
PRDM15	4.28E-31	0.410402492	0.238	0.1	9.68E-27	2.15E-30	12.17558301	29.66741976	black
X4732440D04RIK	4.39E-31	0.652858353	0.133	0.038	9.93E-27	2.21E-30	19.36149684	29.65650475	black
RASA3	4.49E-31	0.298874693	0.324	0.154	1.01E-26	2.25E-30	8.86093649	29.64766403	black
ASB13	4.52E-31	0.428462226	0.211	0.083	1.02E-26	2.26E-30	12.7018526	29.64520984	black
NUMB	4.68E-31	0.322538627	0.584	0.336	1.06E-26	2.34E-30	9.556946354	29.63039323	black
SNRNP40	4.71E-31	0.345892485	0.282	0.127	1.06E-26	2.36E-30	10.24793966	29.62752904	black
EBP	5.02E-31	0.620605209	0.132	0.037	1.14E-26	2.51E-30	18.36980324	29.59982124	black
ATP6V0B	5.19E-31	0.286639036	0.901	0.659	1.17E-26	2.59E-30	8.480522086	29.58606829	black
STAT2	5.19E-31	0.472143608	0.213	0.084	1.17E-26	2.59E-30	13.96879765	29.58590864	black
PFDN6	5.20E-31	0.453653619	0.192	0.072	1.18E-26	2.60E-30	13.42147981	29.58530308	black
HLF	5.34E-31	0.402430025	0.25	0.109	1.21E-26	2.67E-30	11.90144781	29.57395592	black
PCYT1A	5.44E-31	0.336339098	0.254	0.11	1.23E-26	2.71E-30	9.944332122	29.56638759	black
ATXN10	5.48E-31	0.295544082	0.71	0.427	1.24E-26	2.73E-30	8.73732511	29.5635259	black
COQ3	5.67E-31	0.363264105	0.335	0.163	1.28E-26	2.83E-30	10.73405454	29.54889953	black
IQCE	5.75E-31	0.328233408	0.346	0.168	1.30E-26	2.86E-30	9.697101488	29.5433105	black
GRAMD4	5.83E-31	0.363937718	0.265	0.117	1.32E-26	2.90E-30	10.74965137	29.53706315	black
GAB1	6.01E-31	0.761528783	0.144	0.045	1.36E-26	2.99E-30	22.48384897	29.52462137	black
LGI2	6.01E-31	0.518556325	0.265	0.12	1.36E-26	2.99E-30	15.31017914	29.52462137	black
UBR3	6.07E-31	-0.635553982	0.715	0.657	1.37E-26	3.01E-30	18.76206029	29.52079729	black
PDAP1	6.17E-31	0.452570908	0.22	0.089	1.40E-26	3.07E-30	13.35692271	29.51343641	black
ABHD16A	6.23E-31	0.25373582	0.42	0.214	1.41E-26	3.09E-30	7.487641548	29.50959603	black
CHCHD6	6.31E-31	0.249822025	0.448	0.232	1.43E-26	3.13E-30	7.370865208	29.50446504	black
RBKS	6.49E-31	0.614012291	0.171	0.06	1.47E-26	3.22E-30	18.10881702	29.49259693	black
RAP1A	6.69E-31	0.327148013	0.407	0.211	1.51E-26	3.31E-30	9.644205998	29.47964104	black
BCL11B	6.95E-31	0.517787177	0.349	0.183	1.57E-26	3.44E-30	15.2557141	29.46329065	black
CMSS1	7.07E-31	0.362275084	0.339	0.166	1.60E-26	3.50E-30	10.67125224	29.45621355	black
SMYD5	7.23E-31	0.401526759	0.201	0.076	1.63E-26	3.58E-30	11.82359713	29.44659817	black
PIK3C2B	7.32E-31	0.371047679	0.275	0.125	1.66E-26	3.62E-30	10.92406785	29.44114319	black
PACSIN2	7.33E-31	0.469022809	0.209	0.083	1.66E-26	3.62E-30	13.80839687	29.440779	black
ATP5D	7.42E-31	0.30150011	0.35	0.17	1.68E-26	3.66E-30	8.874979854	29.43607505	black
WBP4	7.53E-31	0.311307348	0.318	0.15	1.70E-26	3.72E-30	9.161677475	29.42968589	black
COIL	8.25E-31	0.519176053	0.184	0.067	1.87E-26	4.07E-30	15.25864999	29.39012671	black
CPLANE1	8.27E-31	-0.565206785	0.786	0.715	1.87E-26	4.08E-30	16.61111799	29.38945255	black
FAM234A	8.28E-31	0.421504736	0.25	0.109	1.87E-26	4.08E-30	12.38768862	29.38920388	black
RCL1	8.45E-31	0.480138377	0.178	0.064	1.91E-26	4.16E-30	14.10677366	29.38064176	black
KCNB1	8.49E-31	0.296971085	0.394	0.198	1.92E-26	4.18E-30	8.724719258	29.37901941	black
SLC31A2	8.51E-31	0.662862657	0.124	0.033	1.92E-26	4.19E-30	19.47366082	29.37812323	black
RGS10	8.71E-31	0.630968964	0.143	0.043	1.97E-26	4.29E-30	18.53030435	29.36801238	black
TOMM6	9.12E-31	0.31413444	0.342	0.166	2.06E-26	4.48E-30	9.219440765	29.34871056	black
SNRK	9.28E-31	0.350234771	0.32	0.152	2.10E-26	4.56E-30	10.27634658	29.34130881	black
GRIN2B	9.71E-31	0.262095845	0.96	0.842	2.19E-26	4.77E-30	7.685141927	29.32187623	black
HRAS	1.03E-30	0.392828347	0.214	0.085	2.32E-26	5.04E-30	11.50875094	29.29714982	black
LRPPRC	1.04E-30	0.31214002	0.469	0.252	2.34E-26	5.09E-30	9.14368087	29.29352301	black
PSTK	1.04E-30	0.279556032	0.345	0.166	2.35E-26	5.10E-30	8.188947375	29.29268708	black
PIP4P1	1.09E-30	0.337648092	0.324	0.152	2.46E-26	5.33E-30	9.88397373	29.27300338	black
ACTR3B	1.09E-30	0.272545709	0.294	0.135	2.47E-26	5.36E-30	7.977691383	29.27102179	black
CERS2	1.10E-30	0.520507193	0.198	0.077	2.48E-26	5.36E-30	15.23563394	29.27074618	black
PIK3R1	1.13E-30	0.368779118	0.334	0.164	2.56E-26	5.53E-30	10.78941318	29.25711535	black
GALNT2	1.16E-30	0.379030068	0.277	0.125	2.63E-26	5.69E-30	11.08470639	29.24492624	black
TMEM158	1.19E-30	0.51697183	0.172	0.06	2.68E-26	5.79E-30	15.1147767	29.23713792	black
GM9993	1.20E-30	0.639482683	0.118	0.03	2.71E-26	5.86E-30	18.69336689	29.23201422	black
BCAS2	1.21E-30	0.309988204	0.314	0.147	2.73E-26	5.90E-30	9.060646668	29.22900465	black
ST6GAL1	1.31E-30	0.524577285	0.226	0.095	2.96E-26	6.39E-30	15.31461522	29.19420199	black
GM17106	1.32E-30	0.508505312	0.16	0.054	2.99E-26	6.46E-30	14.84330726	29.19007313	black
TLE2	1.33E-30	0.354681459	0.279	0.128	3.00E-26	6.47E-30	10.35289578	29.18927819	black
SPG20	1.34E-30	0.6028908	0.119	0.03	3.03E-26	6.52E-30	17.59575686	29.18564498	black
GUF1	1.40E-30	0.306908729	0.416	0.215	3.15E-26	6.79E-30	8.951963404	29.16816165	black
PITPNB	1.44E-30	0.280077113	0.268	0.118	3.26E-26	7.01E-30	8.16551924	29.15453945	black
UTY	1.45E-30	0.281225493	0.782	0.51	3.29E-26	7.07E-30	8.197950837	29.15080969	black
B3GNT2	1.48E-30	0.433655031	0.196	0.075	3.34E-26	7.18E-30	12.6385166	29.1441715	black
MFAP3L	1.48E-30	0.478346455	0.171	0.06	3.34E-26	7.18E-30	13.94101112	29.1441715	black
YAE1D1	1.51E-30	0.000733433	0.24	0.101	3.42E-26	7.35E-30	0.021367668	29.13374938	black
PPP2R5B	1.53E-30	0.463919825	0.182	0.066	3.46E-26	7.43E-30	13.51363446	29.12924547	black
USP46	1.54E-30	0.340143921	0.353	0.175	3.47E-26	7.45E-30	9.907687926	29.12792885	black
EXT2	1.55E-30	0.245203414	0.411	0.21	3.51E-26	7.51E-30	7.141337404	29.12413529	black
ZWINT	1.57E-30	0.284032892	0.78	0.501	3.55E-26	7.60E-30	8.270785314	29.11911106	black
SNUPN	1.57E-30	0.479107721	0.213	0.086	3.56E-26	7.62E-30	13.9507555	29.11820223	black
MAP4K5	1.60E-30	0.245456543	0.511	0.277	3.61E-26	7.73E-30	7.145712436	29.11192483	black
EMC8	1.60E-30	0.367593372	0.242	0.102	3.62E-26	7.74E-30	10.70100721	29.11099066	black
IRX5	1.70E-30	0.744521421	0.101	0.022	3.84E-26	8.20E-30	21.65533979	29.08625486	black
USP10	1.72E-30	0.414848446	0.239	0.101	3.89E-26	8.31E-30	12.06391302	29.08028978	black
PSMA2	1.73E-30	0.362669808	0.325	0.156	3.90E-26	8.33E-30	10.54620037	29.07934475	black
ZBTB7C	1.73E-30	0.731880001	0.215	0.09	3.92E-26	8.36E-30	21.281311	29.07759601	black
ZMAT5	1.78E-30	0.499276525	0.164	0.056	4.02E-26	8.58E-30	14.5123013	29.06666059	black
ZDHHC20	1.84E-30	0.353666437	0.746	0.491	4.15E-26	8.84E-30	10.27524273	29.05348555	black
RNF115	1.87E-30	0.324556144	0.362	0.182	4.22E-26	9.00E-30	9.427012317	29.04585998	black
FARP1	1.90E-30	0.272162456	0.674	0.409	4.29E-26	9.13E-30	7.903483923	29.0395819	black
NFKB1	1.96E-30	0.292055296	0.497	0.271	4.43E-26	9.42E-30	8.477151231	29.02584317	black
SWT1	1.98E-30	0.261818768	0.49	0.263	4.47E-26	9.50E-30	7.598519476	29.02205803	black
ZFP612	1.99E-30	0.296452424	0.521	0.288	4.51E-26	9.58E-30	8.602612289	29.01852573	black
SIRT2	2.07E-30	0.273307889	0.36	0.178	4.69E-26	9.96E-30	7.926417539	29.00178829	black
AAMDC	2.09E-30	0.443343648	0.192	0.072	4.72E-26	1.00E-29	12.85656725	28.99910107	black
TENM1	2.12E-30	-0.577078774	0.817	0.794	4.80E-26	1.02E-29	16.73080853	28.99224386	black
TMEM208	2.21E-30	0.266653074	0.468	0.249	5.00E-26	1.06E-29	7.726181356	28.97465696	black
DCAF7	2.24E-30	0.280168263	0.372	0.187	5.06E-26	1.07E-29	8.116419873	28.96980477	black
SRRM4	2.26E-30	0.361184158	0.475	0.267	5.10E-26	1.08E-29	10.46207807	28.96604914	black
ZFP637	2.42E-30	0.578653864	0.147	0.046	5.48E-26	1.16E-29	16.74351683	28.93528908	black
VSTM2B	2.43E-30	0.502959348	0.216	0.089	5.50E-26	1.16E-29	14.55280724	28.9343608	black
MAX	2.47E-30	0.465204757	0.205	0.081	5.57E-26	1.18E-29	13.45763083	28.92840331	black
FSCN1	2.47E-30	0.435931054	0.217	0.088	5.59E-26	1.18E-29	12.61051822	28.92778137	black
CORO2A	2.51E-30	0.456710543	0.242	0.104	5.68E-26	1.20E-29	13.20850823	28.92096191	black
DDOST	2.56E-30	0.393606838	0.266	0.118	5.78E-26	1.22E-29	11.38064985	28.91375039	black
TUT4	2.57E-30	-0.696789781	0.691	0.652	5.82E-26	1.23E-29	20.14468132	28.91070143	black
SSBP3	2.60E-30	0.302521984	0.452	0.243	5.88E-26	1.24E-29	8.744879218	28.90659084	black
G6PDX	2.72E-30	0.523711503	0.146	0.046	6.16E-26	1.30E-29	15.12830646	28.8867179	black
TCEAL5	2.73E-30	0.320568682	0.358	0.177	6.16E-26	1.30E-29	9.260177071	28.8867179	black
ZFP771	2.78E-30	0.277014656	0.327	0.157	6.29E-26	1.32E-29	7.999615792	28.87795151	black
TMEM38A	2.82E-30	0.212687682	0.412	0.211	6.38E-26	1.34E-29	6.140773577	28.87225775	black
RDH14	2.85E-30	0.484759201	0.211	0.085	6.43E-26	1.35E-29	13.99431614	28.86859316	black
PHACTR3	2.90E-30	0.285007645	0.637	0.376	6.57E-26	1.38E-29	8.22528818	28.85988612	black
PCLO	2.91E-30	-0.354041957	0.941	0.899	6.58E-26	1.38E-29	10.21731185	28.8590424	black
TMEM88B	2.94E-30	0.668351335	0.116	0.029	6.64E-26	1.39E-29	19.28566057	28.85557276	black
NAE1	2.94E-30	0.257551981	0.397	0.202	6.65E-26	1.40E-29	7.431696642	28.85513293	black
TRERF1	3.05E-30	0.325227047	0.833	0.577	6.89E-26	1.45E-29	9.379435054	28.83965259	black
GRIK2	3.23E-30	-0.405842428	0.942	0.925	7.29E-26	1.53E-29	11.6944982	28.81536626	black
MPRIP	3.30E-30	0.291620307	0.63	0.369	7.45E-26	1.56E-29	8.400524654	28.80637747	black
MN1	3.36E-30	0.714604462	0.101	0.022	7.59E-26	1.59E-29	20.57948513	28.79842796	black
X1700016P03RIK	3.55E-30	0.770750418	0.162	0.057	8.03E-26	1.68E-29	22.1780193	28.77457964	black
BRDT	3.69E-30	0.327528841	0.309	0.146	8.34E-26	1.75E-29	9.419091485	28.7580521	black
STXBP4	3.72E-30	0.256841953	0.435	0.228	8.41E-26	1.76E-29	7.385473218	28.75493323	black
PKM	3.79E-30	0.295518031	0.693	0.417	8.57E-26	1.79E-29	8.495171796	28.7467122	black
NXPE4	3.91E-30	0.37808282	0.36	0.183	8.84E-26	1.85E-29	10.86374803	28.73377855	black
EIF4A2	4.02E-30	0.31110832	0.529	0.295	9.09E-26	1.90E-29	8.935574698	28.72174776	black
RBFOX1	4.04E-30	-0.294427828	0.985	0.976	9.14E-26	1.91E-29	8.455801465	28.71943703	black
SLC25A25	4.05E-30	0.424363245	0.253	0.111	9.17E-26	1.91E-29	12.18717002	28.71872193	black
KHDRBS1	4.06E-30	0.30205551	0.449	0.238	9.17E-26	1.91E-29	8.674648191	28.71872193	black
DNAJA2	4.07E-30	0.280620925	0.306	0.143	9.19E-26	1.91E-29	8.058837646	28.7178786	black
CNNM2	4.17E-30	0.323648145	0.321	0.154	9.42E-26	1.96E-29	9.291140748	28.70753591	black
NCALD	4.67E-30	0.310476401	0.619	0.368	1.06E-25	2.20E-29	8.897611801	28.65793265	black
FAM13C	4.82E-30	0.301688356	0.378	0.192	1.09E-25	2.27E-29	8.641756823	28.6446482	black
PAPSS1	4.98E-30	0.364703402	0.267	0.12	1.13E-25	2.34E-29	10.44158425	28.63034504	black
FBXL16	5.02E-30	0.382077515	0.277	0.128	1.14E-25	2.36E-29	10.93783365	28.62726336	black
MRPL52	5.06E-30	0.388649898	0.231	0.097	1.14E-25	2.38E-29	11.12474793	28.62408555	black
ZFP354C	5.14E-30	0.31434373	0.25	0.108	1.16E-25	2.41E-29	8.995894624	28.61801831	black
RABL6	5.18E-30	0.282532553	0.652	0.391	1.17E-25	2.43E-29	8.084524055	28.61448696	black
BMYC	5.20E-30	0.345828773	0.301	0.143	1.18E-25	2.44E-29	9.895204343	28.61301634	black
SRRM3	5.33E-30	0.288660547	0.761	0.486	1.21E-25	2.50E-29	8.256405922	28.60247443	black
GUCY1B1	5.38E-30	0.304310987	0.423	0.225	1.22E-25	2.52E-29	8.703024059	28.59911221	black
ZDHHC6	5.40E-30	0.271625454	0.387	0.196	1.22E-25	2.53E-29	7.767669912	28.59698823	black
ALG2	5.43E-30	0.295504973	0.323	0.153	1.23E-25	2.54E-29	8.45012398	28.59553904	black
FABP3	5.69E-30	0.55222777	0.142	0.044	1.29E-25	2.66E-29	15.78003411	28.57522741	black
SLC30A6	6.15E-30	0.422222295	0.258	0.114	1.39E-25	2.87E-29	12.05083185	28.54143894	black
MVB12A	6.25E-30	0.428499466	0.207	0.082	1.41E-25	2.92E-29	12.22709228	28.53467331	black
STX7	6.31E-30	0.323429043	0.311	0.148	1.43E-25	2.95E-29	9.227628578	28.53061218	black
HCFC1R1	6.57E-30	0.341932451	0.25	0.109	1.48E-25	3.06E-29	9.749726235	28.51360319	black
B3GALNT1	6.99E-30	0.337850532	0.233	0.097	1.58E-25	3.26E-29	9.624380135	28.48709482	black
NAPEPLD	7.27E-30	0.505164848	0.134	0.039	1.64E-25	3.39E-29	14.38218481	28.4702803	black
SRSF5	7.32E-30	0.254771961	0.623	0.361	1.66E-25	3.41E-29	7.252647679	28.46721302	black
PLEKHH2	7.48E-30	0.378335542	0.248	0.109	1.69E-25	3.48E-29	10.76674899	28.45820127	black
PCBP1	7.60E-30	0.552984075	0.154	0.051	1.72E-25	3.54E-29	15.7332754	28.45158861	black
2-Mar	7.61E-30	0.37509147	0.214	0.086	1.72E-25	3.54E-29	10.67184083	28.45130234	black
SC5D	7.87E-30	0.37546728	0.256	0.114	1.78E-25	3.66E-29	10.67697641	28.43650293	black
DHRS7	8.02E-30	0.567821607	0.171	0.061	1.81E-25	3.72E-29	16.14257243	28.42895062	black
F730043M19RIK	8.09E-30	0.555963394	0.191	0.075	1.83E-25	3.75E-29	15.80349319	28.42542038	black
PET100	8.36E-30	0.392402034	0.282	0.129	1.89E-25	3.88E-29	11.14868127	28.41137485	black
NKAIN2	8.36E-30	-0.360128594	0.959	0.957	1.89E-25	3.88E-29	10.23174847	28.41137485	black
GAS7	8.37E-30	0.380336682	0.27	0.123	1.89E-25	3.88E-29	10.80588498	28.41136682	black
ZFP239	8.38E-30	0.416648485	0.27	0.123	1.89E-25	3.88E-29	11.83741762	28.41104201	black
DNAJC18	8.75E-30	0.237704602	0.458	0.242	1.98E-25	4.05E-29	6.748982234	28.39230789	black
PSMB3	9.33E-30	0.308166523	0.315	0.151	2.11E-25	4.32E-29	8.741083651	28.36480604	black
SIPA1L3	9.35E-30	0.240672285	0.417	0.216	2.11E-25	4.32E-29	6.826469656	28.36417023	black
LRRFIP1	1.01E-29	0.286143584	0.618	0.367	2.28E-25	4.66E-29	8.10694997	28.33175521	black
ACOT13	1.02E-29	0.434260192	0.206	0.082	2.31E-25	4.73E-29	12.30064527	28.3255189	black
ZFP821	1.03E-29	0.337312051	0.276	0.126	2.33E-25	4.76E-29	9.553460132	28.32232084	black
RAB26OS	1.10E-29	-1.344983598	0.167	0.267	2.49E-25	5.10E-29	38.05341744	28.29284869	blue
PDXP	1.16E-29	0.371673122	0.277	0.127	2.62E-25	5.36E-29	10.50759325	28.27106036	black
PPFIBP2	1.30E-29	0.726664105	0.128	0.037	2.95E-25	6.01E-29	20.50731773	28.22117894	black
NRG1	1.33E-29	-0.605788627	0.889	0.876	3.01E-25	6.14E-29	17.09040949	28.21183614	black
TBC1D13	1.36E-29	0.386580079	0.209	0.084	3.08E-25	6.28E-29	10.90238655	28.20214269	black
BUD13	1.44E-29	0.603763604	0.115	0.03	3.24E-25	6.61E-29	17.01398428	28.1798773	black
CGREF1	1.47E-29	0.448709465	0.189	0.071	3.32E-25	6.75E-29	12.64040515	28.17057835	black
SPATA7	1.48E-29	0.271811527	0.64	0.378	3.35E-25	6.81E-29	7.656049024	28.16675622	black
HMGXB4	1.63E-29	0.310046339	0.233	0.099	3.67E-25	7.47E-29	8.72054866	28.12659775	black
AHDC1	1.65E-29	0.381632574	0.255	0.113	3.73E-25	7.57E-29	10.73180809	28.12078638	black
LHX9	1.69E-29	0.284459192	0.36	0.183	3.81E-25	7.74E-29	7.996477807	28.11115982	black
DENND5A	1.72E-29	0.23242452	0.425	0.222	3.89E-25	7.89E-29	6.531767707	28.10274797	black
SNAP47	1.74E-29	0.295403637	0.426	0.224	3.92E-25	7.97E-29	8.300490376	28.09880897	black
RNF152	1.78E-29	0.329632814	0.39	0.204	4.02E-25	8.15E-29	9.258916413	28.08857621	black
AVL9	1.90E-29	0.311752864	0.291	0.136	4.30E-25	8.71E-29	8.747817294	28.06010243	black
YIPF5	1.91E-29	0.251746735	0.421	0.218	4.31E-25	8.74E-29	7.063684979	28.0586955	black
ADSSL1	1.97E-29	0.618282563	0.116	0.03	4.46E-25	9.02E-29	17.33948622	28.04459846	black
SNAPC1	1.97E-29	0.343286339	0.248	0.109	4.46E-25	9.02E-29	9.627327541	28.04459846	black
SYT2	1.97E-29	0.418883109	0.462	0.274	4.46E-25	9.03E-29	11.74732697	28.04440361	black
TEX264	2.02E-29	0.352353731	0.252	0.111	4.57E-25	9.23E-29	9.878124498	28.03468117	black
VGLL4	2.02E-29	0.339013247	0.275	0.126	4.57E-25	9.24E-29	9.503950297	28.03415614	black
EML1	2.06E-29	0.286985554	0.364	0.184	4.67E-25	9.43E-29	8.042950198	28.02562736	black
HGSNAT	2.16E-29	0.335564216	0.266	0.12	4.89E-25	9.87E-29	9.397688443	28.00563346	black
PCGF5	2.27E-29	0.293326	0.494	0.277	5.14E-25	1.04E-28	8.208500437	27.98422382	black
PDPR	2.30E-29	0.297001166	0.3	0.141	5.19E-25	1.05E-28	8.310015841	27.97974149	black
PRKCZ	2.46E-29	0.2795705	0.692	0.416	5.55E-25	1.12E-28	7.814247053	27.95089991	black
EBPL	2.48E-29	0.48511817	0.217	0.09	5.60E-25	1.13E-28	13.55784776	27.94751589	black
GM19409	2.52E-29	0.566870088	0.129	0.038	5.70E-25	1.15E-28	15.83829993	27.9399112	black
NFIC	2.62E-29	0.307075272	0.318	0.153	5.92E-25	1.19E-28	8.574684325	27.92372132	black
BLMH	2.67E-29	0.232991423	0.37	0.186	6.04E-25	1.22E-28	6.503974265	27.91508026	black
SMC1A	2.73E-29	0.386993552	0.225	0.094	6.18E-25	1.24E-28	10.79925912	27.90552727	black
ZFP704	2.78E-29	0.273388873	0.641	0.382	6.29E-25	1.26E-28	7.627021127	27.89806714	black
TMCO6	2.84E-29	0.546072004	0.142	0.045	6.42E-25	1.29E-28	15.22953734	27.88924763	black
RALGPS1	2.92E-29	0.28290519	0.728	0.457	6.60E-25	1.33E-28	7.886731813	27.87764977	black
RHOBTB3	2.99E-29	0.320062046	0.338	0.168	6.76E-25	1.36E-28	8.919346499	27.8675545	black
NALCN	3.09E-29	-0.512316834	0.829	0.768	6.98E-25	1.40E-28	14.27008942	27.85403187	black
OLA1	3.11E-29	0.265293816	0.474	0.255	7.04E-25	1.41E-28	7.388552058	27.85044963	black
MFAP1A	3.20E-29	0.358610023	0.247	0.109	7.22E-25	1.45E-28	9.983519551	27.83948837	black
PNMAL2	3.21E-29	0.248815241	0.407	0.21	7.25E-25	1.45E-28	6.926569499	27.83820426	black
CABIN1	3.25E-29	0.229372337	0.404	0.206	7.35E-25	1.47E-28	6.384012272	27.83252924	black
SLC7A6OS	3.47E-29	0.296253969	0.326	0.158	7.84E-25	1.57E-28	8.237272939	27.80476825	black
RBM8A	3.53E-29	0.451010941	0.189	0.073	7.99E-25	1.60E-28	12.53662818	27.79672742	black
JAKMIP3	3.54E-29	0.227353565	0.384	0.193	8.00E-25	1.60E-28	6.319523608	27.79601719	black
VAT1L	3.70E-29	0.411483511	0.497	0.291	8.36E-25	1.67E-28	11.42994015	27.7773953	black
CUEDC2	3.88E-29	0.39005882	0.231	0.098	8.76E-25	1.75E-28	10.82695334	27.75723246	black
MICOS10	3.99E-29	0.277411039	0.42	0.221	9.02E-25	1.80E-28	7.696775483	27.74502234	black
PDE11A	4.11E-29	0.654589538	0.169	0.063	9.29E-25	1.85E-28	18.15319506	27.73218026	black
ABCB9	4.14E-29	0.350545021	0.309	0.15	9.35E-25	1.86E-28	9.72041565	27.7294358	black
PARD6G	4.19E-29	0.531585653	0.133	0.04	9.46E-25	1.89E-28	14.73801683	27.72463239	black
MIIP	4.24E-29	0.435497134	0.152	0.051	9.57E-25	1.91E-28	12.07188098	27.71977135	black
SLC24A5	4.39E-29	-1.381135907	0.129	0.23	9.91E-25	1.97E-28	38.26418905	27.70486875	blue
EXT1	4.40E-29	0.421105581	0.755	0.514	9.96E-25	1.98E-28	11.66599044	27.70324349	black
RAB11A	4.51E-29	0.322599878	0.283	0.13	1.02E-24	2.03E-28	8.933687791	27.69278106	black
CEND1	4.70E-29	0.347013748	0.299	0.143	1.06E-24	2.11E-28	9.603671506	27.67519027	black
ECE1	4.71E-29	0.361414595	0.228	0.095	1.06E-24	2.11E-28	10.00221769	27.67519027	black
GNPDA2	4.72E-29	0.544621637	0.15	0.05	1.07E-24	2.12E-28	15.07175112	27.67380155	black
NUCKS1	4.78E-29	0.270914824	0.414	0.217	1.08E-24	2.14E-28	7.495904618	27.66886102	black
ACVR2B	4.84E-29	0.31501905	0.249	0.109	1.09E-24	2.17E-28	8.714672548	27.66395412	black
VPS8	4.91E-29	0.294950235	0.381	0.195	1.11E-24	2.20E-28	8.157530946	27.6573129	black
PNKD	5.03E-29	0.268470808	0.524	0.295	1.14E-24	2.25E-28	7.422565371	27.64756969	black
ZRSR2	5.08E-29	0.601861457	0.141	0.045	1.15E-24	2.27E-28	16.63759598	27.64356444	black
A430033K04RIK	5.09E-29	0.413487317	0.204	0.082	1.15E-24	2.28E-28	11.42981287	27.64247511	black
JPH4	5.27E-29	0.262169438	0.427	0.223	1.19E-24	2.36E-28	7.243095732	27.62753653	black
ZFP667	5.33E-29	0.409934449	0.181	0.068	1.20E-24	2.38E-28	11.32367044	27.62312479	black
UEVLD	5.60E-29	0.345080913	0.249	0.11	1.27E-24	2.50E-28	9.524747487	27.6014903	black
PDCD11	5.66E-29	0.274624225	0.258	0.114	1.28E-24	2.53E-28	7.578934496	27.59747251	black
BCR	5.90E-29	0.240775732	0.416	0.218	1.33E-24	2.63E-28	6.640487444	27.57955463	black
DOK6	6.31E-29	-0.52622024	0.861	0.792	1.43E-24	2.81E-28	14.49787231	27.55095913	black
MRPS12	6.65E-29	0.428060031	0.196	0.077	1.50E-24	2.96E-28	11.78376377	27.52829722	black
ULK4	6.72E-29	0.369040114	0.234	0.101	1.52E-24	2.99E-28	10.1574243	27.52390298	black
ATG5	7.07E-29	0.355177563	0.266	0.122	1.60E-24	3.15E-28	9.768050647	27.50187982	black
DESI1	7.07E-29	0.231447293	0.383	0.197	1.60E-24	3.15E-28	6.365235622	27.50187982	black
SAMD10	7.09E-29	0.43937474	0.184	0.07	1.60E-24	3.15E-28	12.08335722	27.50125603	black
APOPT1	7.40E-29	0.339132603	0.227	0.097	1.67E-24	3.29E-28	9.320385205	27.48301141	black
HSF1	7.53E-29	0.389225831	0.236	0.102	1.70E-24	3.35E-28	10.69404009	27.47515517	black
MAPKBP1	7.56E-29	0.245533298	0.41	0.213	1.71E-24	3.36E-28	6.745736054	27.47381358	black
MTHFD1L	7.63E-29	0.372298387	0.265	0.12	1.72E-24	3.39E-28	10.22710534	27.47018436	black
LACTB	7.87E-29	0.479980739	0.159	0.055	1.78E-24	3.49E-28	13.17877643	27.45688597	black
CNIH3	8.05E-29	0.593829264	0.205	0.086	1.82E-24	3.57E-28	16.29901256	27.44730439	black
USP4	8.12E-29	0.252532	0.37	0.187	1.84E-24	3.60E-28	6.930428953	27.44376531	black
HIPK2	8.45E-29	0.314651255	0.533	0.311	1.91E-24	3.74E-28	8.629873756	27.42678957	black
PMM2	8.49E-29	0.374527656	0.228	0.097	1.92E-24	3.76E-28	10.27145036	27.42507848	black
GRCC10	8.52E-29	0.260260981	0.296	0.139	1.93E-24	3.77E-28	7.137315645	27.42368689	black
FAM189A2	9.24E-29	0.653264439	0.12	0.033	2.09E-24	4.09E-28	17.89184424	27.38836397	black
TSEN2	9.26E-29	0.261051928	0.264	0.12	2.09E-24	4.10E-28	7.149614505	27.38771002	black
OSBPL1A	9.61E-29	0.304819338	0.409	0.218	2.17E-24	4.25E-28	8.343542421	27.37209018	black
SAP30BP	9.62E-29	0.36053837	0.196	0.077	2.18E-24	4.25E-28	9.86845873	27.37145214	black
PTK7	9.74E-29	0.375799839	0.226	0.097	2.20E-24	4.30E-28	10.28428448	27.36638871	black
SNTB2	9.85E-29	0.304543436	0.502	0.286	2.23E-24	4.35E-28	8.332910715	27.36197777	black
RWDD1	1.08E-28	0.401469208	0.216	0.09	2.44E-24	4.76E-28	10.96895046	27.32202184	black
[truncated: 6,818 more rows]
