# Supplementary figures and images for: Single-Cell Analyses Reveal Necroptosis’s Potential Role in Neuron Degeneration and Show Enhanced Neuron-Immune Cell Interaction in Parkinson’s Disease Progression
Source: Hindawi journal article supplement (doi:10.1155/2023/5057778), 2023-12-19

**A**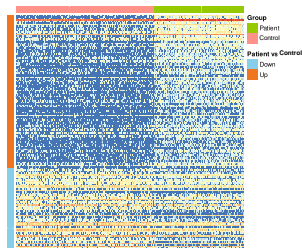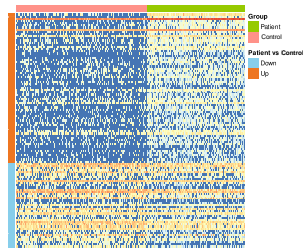**B**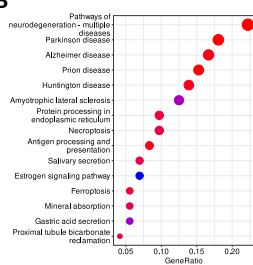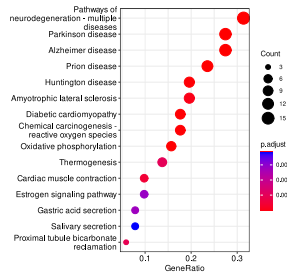**C**

PCA - DA - Patient

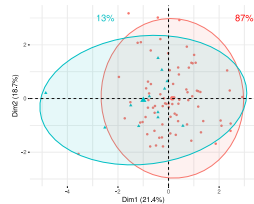

PCA - DA - Control

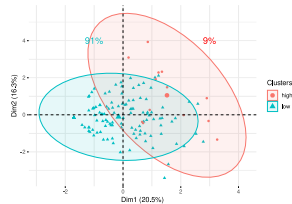**D**

PCA - GABA - Patient

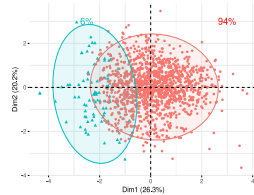

PCA - GABA - Control

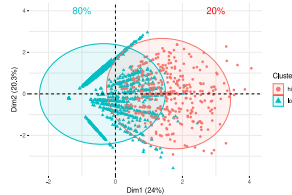

Supplement: f1 [file 5057778.f1.zip]
